# Supplementary material for: Olfactory receptors in macrophages and inflammation
Source: Front Immunol. 2022 Oct 13;13:1029244. doi: 10.3389/fimmu.2022.1029244 (PMC9606742; doi:10.3389/fimmu.2022.1029244)
Supplement: Supplementary file 1 [file Table_1.xlsx]

## Sheet:  Supplementary table 1a
Supplementary table 1a: OR genes expression in macrophages and monocytes subsets.
	IP Mø LPS			IP Mø Naïve			Vascular Mø Naïve			Vascular Mø Sepsis			BMDM Naive			BMDM LPS				SI Mø			Lung Mø			Spleen (RP) Mø			Mo.6C+II+.Bl		Mo.6C+II-.Bl			Mo.6C-II+.Bl		Mo.6C-II-.Bl		Microglia
GSM number	GSM1055989_Wildtype_._LPS_1.CEL.gz	GSM1055990_Wildtype_._LPS_2.CEL.gz	GSM1055992_Wildtype_._LPS_3.CEL.gz	GSM1055994_Wildtype_control_1.CEL.gz	GSM1055995_Wildtype_control_2.CEL.gz	GSM1055997_Wildtype_control_3.CEL.gz	GSM1689051_Sep_17_MoGene.1_0.st.v1_.CEL.gz	GSM1689052_Sep_29_MoGene.1_0.st.v1_.CEL.gz	GSM1689053_Sep_30_MoGene.1_0.st.v1_.CEL.gz	GSM1689054_Oct_14_MoGene.1_0.st.v1_.CEL.gz	GSM1689055_Oct_16_MoGene.1_0.st.v1_.CEL.gz	GSM1689056_Oct_17_MoGene.1_0.st.v1_.CEL.gz	GSM2044371_01_WB1.CEL.gz	GSM2044372_02_WB2.CEL.gz	GSM2044373_03_WB3.CEL.gz	GSM2044374_21_W5L1.CEL.gz	GSM2044375_22_W5L2.CEL.gz	GSM2044376_23_W5L3.CEL.gz	GSM2044377_24_W5L4.CEL.gz	GSM2680242_TLE_MP1_MoGene.CEL.gz	GSM2680243_TLE_MP2_MoGene.CEL.gz	GSM2680244_TLE_MP3_MoGene.CEL.gz	GSM538282_EA07068_87584_MoGene_MF.LU.1.CEL.gz	GSM538283_EA07068_87585_MoGene_MF.LU.2.CEL.gz	GSM538284_EA07068_87586_MoGene_MF.LU.3.CEL.gz	GSM605853_EA07068_105221_MoGene_MF.RP.SP.1.CEL.gz	GSM605854_EA07068_105222_MoGene_MF.RP.SP.2.CEL.gz	GSM605855_EA07068_105223_MoGene_MF.RP.SP.3.CEL.gz	GSM605868_EA07068_96442_MoGene_MO.6C.II..BL.1.CEL.gz	GSM605870_EA07068_96444_MoGene_MO.6C.II..BL.3.CEL.gz	GSM605872_EA07068_96439_MoGene_MO.6C.II..BL.1.CEL.gz	GSM605873_EA07068_96440_MoGene_MO.6C.II..BL.2.CEL.gz	GSM605874_EA07068_96441_MoGene_MO.6C.II..BL.3.CEL.gz	GSM605878_EA07068_96448_MoGene_MO.6C.II..BL.1.CEL.gz	GSM605879_EA07068_103617_MoGene_MO.6C.II..BL.4.CEL.gz	GSM605884_EA07068_96447_MoGene_MO.6C.II..BL.3.CEL.gz	GSM605885_EA07068_103621_MoGene_MO.6C.II..BL.4.CEL.gz	GSM854326_EA07068_111383_MoGene_MICROGLIA.CNS_1.CEL.gz	GSM854327_EA07068_111384_MoGene_MICROGLIA.CNS_2.CEL.gz	GSM854328_EA07068_111385_MoGene_MICROGLIA.CNS_3.CEL.gz
Gapdh	12.535	12.5335	12.3569	12.4431	12.6087	12.5219	9.67295	9.66848	9.95359	9.46657	9.89078	9.3304	10.9761	11.1091	11.0801	10.6641	10.6349	10.5799	10.7618	10.3265	10.9218	10.5869	12.145	12.2419	12.2145	11.0784	11.4709	11.3845	11.8185	11.6007	11.8049	11.7967	11.8491	11.5822	11.3297	11.6811	11.4043	11.8379	11.813	11.6975
Olfr1	5.16424	4.92174	5.0063	4.99426	4.76236	4.88771	4.58358	4.57622	4.41857	4.60343	4.6153	4.65807	4.87407	4.84425	4.55214	5.23943	4.83223	4.81247	4.75923	4.43617	4.83223	4.82629	4.78288	4.51795	4.8189	4.86607	5.30715	4.85151	4.74016	4.93917	4.93377	4.78594	4.83223	5.97002	5.01465	5.55317	5.28857	4.43336	4.83771	4.65706
Olfr10	5.03725	4.96286	5.07802	4.90872	4.67229	4.80889	5.68209	5.83578	6.92736	5.99272	5.90983	6.46133	4.97114	4.77083	4.74128	5.10079	4.63485	4.87521	5.13759	5.13452	4.98039	4.96639	4.7706	4.9904	4.89329	5.43206	5.2092	5.42843	4.81995	5.03928	5.36612	5.04149	5.10975	5.08331	4.28778	5.69629	5.17178	4.91691	5.51522	5.02494
Olfr100	4.42791	4.57996	4.45566	4.18901	4.32547	4.56441	4.64427	4.45096	5.58499	4.81081	4.80059	4.4166	4.79138	4.14244	4.39526	4.10554	4.82374	3.72636	4.39172	4.06908	4.08871	4.12565	4.33617	4.07359	4.0978	4.37583	3.72107	4.65327	4.36267	5.27415	3.94609	4.67958	4.28062	4.74882	4.39987	4.56814	4.48784	4.46743	5.00975	4.70056
Olfr1000	3.7889	3.90836	3.66187	4.11795	3.40565	3.62531	3.56274	3.51321	3.52292	3.7419	3.47404	3.9455	3.48005	3.62114	3.61012	3.81415	3.84136	3.59051	3.63097	4.03587	3.97278	4.63256	3.69169	3.65023	3.6113	3.81379	3.86683	3.41541	3.7879	3.66534	3.67767	3.66317	3.45456	4.07325	4.35928	3.71457	3.76871	4.13689	3.69328	3.72927
Olfr1002	3.85825	3.54362	3.69449	3.47329	3.53346	3.41877	3.03935	3.08865	3.28285	3.19366	3.19863	3.09276	3.28692	3.35453	3.36825	3.51654	3.6742	3.2801	3.4623	3.30887	3.40112	3.66757	3.23394	3.30684	3.07751	3.50128	3.28492	3.1687	3.53129	3.42001	3.33709	3.30294	3.19145	3.94703	3.75442	3.47748	3.49849	3.23262	3.24199	3.11598
Olfr1006	4.83871	5.08783	4.93693	4.34183	4.82296	4.57135	4.37877	4.54938	4.54876	4.33634	4.51975	4.61784	4.62188	4.89783	4.47217	4.72087	4.60586	4.78734	4.52663	5.26225	4.64955	4.76828	4.65056	4.34436	4.22591	4.84011	4.68049	4.40974	4.59166	4.57713	4.55156	4.59678	4.49311	5.12931	4.82423	4.72723	4.85919	4.89742	4.71922	5.22758
Olfr1008	3.73858	3.66888	3.97179	3.83328	3.7671	3.71767	3.64292	3.69174	4.01209	4.21753	3.83672	4.24348	3.84953	4.22113	4.10343	3.99377	4.17976	3.99131	4.0756	4.80778	3.80888	4.57382	3.80015	3.54589	3.63764	4.25865	3.70334	3.71389	3.65898	3.53304	3.82989	3.85067	3.87321	4.44776	4.13539	3.87697	4.16765	3.85703	4.00557	3.78674
Olfr1009	4.60505	4.73378	4.60083	4.66144	4.40677	4.39557	4.62466	4.62441	5.15316	4.69921	4.4822	5.14667	4.3427	4.38269	4.0957	4.39621	4.42843	4.13095	4.66818	4.62326	4.51194	4.39545	4.55282	4.35063	4.28835	4.55071	4.01561	4.15141	4.62096	4.44058	4.28844	4.04752	4.51194	4.82248	4.68017	4.70956	4.75582	4.86303	4.94423	4.5943
Olfr101	4.65882	4.44027	4.70589	4.37503	4.63913	4.52208	4.94331	4.40268	4.92784	4.43441	4.71164	4.94161	4.59245	4.5431	5.04253	4.87806	4.98474	4.97362	5.09049	4.63546	4.91362	4.8735	4.61567	4.31835	4.28129	4.51082	4.2745	4.69069	4.86823	4.62623	4.54028	4.86429	4.36692	4.74408	4.52585	4.91569	4.57688	4.68919	5.05353	4.15761
Olfr1010	4.88365	5.10046	4.94944	4.68889	4.84055	4.81772	5.13555	5.19727	5.38546	5.08503	4.91182	5.19799	4.66518	4.7895	4.72085	4.83424	4.54665	4.98365	4.53088	4.88365	4.67164	5.27144	4.83176	4.66411	4.53881	4.64717	4.74242	4.76038	4.95538	4.79172	4.62883	4.96601	4.51789	6.17144	4.96654	5.25485	4.97612	5.16822	5.10882	4.84874
Olfr1012	5.21162	5.1119	5.06523	4.98594	5.07369	5.04094	5.34605	5.05352	4.91541	5.18499	5.15997	5.49564	5.05352	5.17745	4.8997	5.81948	4.94324	5.57276	5.09912	4.80513	4.79936	5.26373	4.97745	4.74958	4.85643	5.05648	4.88824	5.13397	4.97529	4.8166	5.17588	4.9951	4.94344	4.75383	5.37908	4.95596	5.08745	5.29965	5.03556	5.27478
Olfr1013	3.97299	3.85796	3.63918	3.96144	3.88323	3.64732	3.50556	3.56188	3.60078	3.40509	3.69989	3.96797	3.51483	3.6806	3.88177	3.86428	3.75866	4.08727	3.97793	3.99927	3.619	4.10936	3.48942	3.49551	3.3522	3.84229	3.43341	3.68097	3.30155	3.77184	3.5914	3.77578	3.55643	3.75437	3.42268	3.63319	3.94491	3.46716	3.96006	3.53309
Olfr1014	3.77145	3.89674	3.74103	3.93536	3.86239	3.70594	3.49585	4.00028	3.74628	3.86134	3.93058	4.29699	3.65568	3.59068	3.40211	3.81089	3.76137	3.67979	3.5675	3.92991	4.03024	3.89911	3.41496	3.45061	3.57733	3.69485	3.64692	3.52584	3.73844	3.63779	3.58108	3.60441	3.51381	3.95468	3.71147	3.70899	3.76552	3.75224	3.6186	3.32154
Olfr1015	4.89227	4.83366	4.9989	5.04321	4.87879	4.87599	4.7748	5.06007	4.49405	4.83982	5.12955	4.86612	4.70312	4.78274	4.71233	4.85016	4.82681	5.13074	5.05962	5.07366	4.74529	5.28434	4.68964	4.67185	4.71495	5.11675	4.8068	4.82522	5.10972	5.23313	4.98921	5.1571	4.71442	5.4307	4.82137	5.33658	4.97645	5.39526	4.85262	4.84281
Olfr1016	5.25491	5.17702	5.46207	4.99116	5.06191	5.03053	5.06844	5.27895	4.92688	4.9406	5.16583	4.87508	4.97485	4.70269	4.52083	4.91907	5.12899	5.28585	4.79011	4.89923	4.8587	5.53093	4.99179	4.72352	4.68836	4.94251	5.10192	5.04928	4.96486	5.08307	5.16376	4.7285	5.05997	5.10447	4.87628	5.18912	5.05839	5.68779	5.12675	5.06839
Olfr1018	4.46072	4.36645	4.37134	4.3188	4.33022	4.39504	4.14132	3.97447	4.21953	3.91173	3.96689	4.05828	3.98094	4.13348	4.31721	4.02968	4.47702	4.22598	4.20206	4.32807	4.35969	4.76059	4.44513	4.33022	4.33259	4.53626	3.95817	4.17977	4.83873	4.5124	4.2511	4.22693	4.35849	4.38314	4.56623	4.82635	4.3604	4.7006	4.33774	4.46838
Olfr1019	4.96792	5.01317	4.66588	4.61514	4.53512	4.83709	4.35954	4.46348	3.9311	4.57337	4.40735	4.41809	4.38485	4.61986	4.48701	4.74473	4.69285	4.75734	4.57917	4.50353	4.81717	4.48724	4.65092	4.60804	4.52238	4.68704	4.5359	4.54881	4.91199	4.69337	4.60133	4.67139	4.67402	4.75214	4.25376	4.75777	4.85577	4.92695	4.74277	4.50701
Olfr102	4.42791	4.57996	4.45566	4.18901	4.32547	4.56441	4.64427	4.45096	5.58499	4.81081	4.80059	4.4166	4.79138	4.14244	4.39526	4.10554	4.82374	3.72636	4.39172	4.06908	4.08871	4.12565	4.33617	4.07359	4.0978	4.37583	3.72107	4.65327	4.36267	5.27415	3.94609	4.67958	4.28062	4.74882	4.39987	4.56814	4.48784	4.46743	5.00975	4.70056
Olfr1020	3.8467	3.92535	3.8937	3.62776	3.49583	3.7521	3.66856	3.81311	3.61748	3.89859	3.84268	4.16526	3.69516	3.84787	3.77867	3.80404	3.65165	3.70439	3.7403	3.72233	3.93215	3.46216	3.40484	3.55562	3.42667	3.5313	3.75138	3.26973	3.35274	3.51353	3.60748	3.61541	3.35802	3.91184	3.89715	3.69495	3.57742	3.67739	3.75803	3.42096
Olfr1022	3.76683	3.93453	3.75453	3.9336	3.71475	3.72085	3.77627	4.16799	4.51919	4.03024	4.05392	4.6039	3.67286	4.0578	4.08334	3.82381	3.69978	3.45925	3.57777	4.15542	3.73818	4.4381	3.63586	3.49289	3.62858	3.72418	3.65596	3.8116	3.71245	3.83142	3.62019	3.74108	3.62909	3.95247	4.24612	4.04019	3.78764	3.93307	3.87481	4.04713
Olfr1023	4.3855	4.0943	3.88755	4.16701	3.89148	3.82463	4.02171	3.74579	3.92608	4.07089	4.02171	4.15684	4.20533	4.01403	3.82881	3.84309	4.22793	4.32956	3.95789	4.50914	3.7823	4.08576	3.77337	3.98079	3.8749	3.74497	4.03282	3.79585	4.20007	4.05921	3.93272	4.04588	3.70021	4.71905	4.39182	4.38485	4.2189	4.02493	3.97288	4.29937
Olfr1024	4.54404	4.73929	4.12593	4.6897	4.50696	4.17577	4.57134	4.32629	4.40074	4.56091	4.6024	4.41429	4.45156	4.18531	4.52297	4.82181	4.35609	4.47528	4.59584	5.43031	4.52536	5.35853	4.52425	4.29612	4.26968	4.70048	4.42405	4.4755	4.67147	4.86293	4.62632	4.63521	4.28498	4.81359	4.62825	4.81136	4.80283	4.56091	4.64819	4.56091
Olfr1026	4.05643	3.94182	4.05043	3.78303	3.95709	3.95779	3.72956	3.78765	3.92203	3.65138	3.5587	3.90319	4.18384	3.92411	3.87339	4.14636	3.86403	3.99291	3.75072	4.0965	4.21164	4.21023	3.77023	3.89506	3.80925	4.20271	3.89472	3.98453	4.1487	4.21488	3.90962	3.80611	3.97462	4.46018	3.81117	3.90263	4.32516	4.28538	4.03024	4.1374
Olfr1028	3.96507	3.44898	3.78263	3.92924	3.69468	3.74883	4.61043	4.50306	4.74613	4.98354	4.42595	5.75973	3.93107	4.40939	4.51897	4.58656	3.99373	4.51103	4.12403	4.62325	4.25941	4.53942	3.81377	3.76804	3.62832	3.82678	3.66551	3.62958	3.9501	3.85101	3.77109	3.90069	3.7286	4.67678	4.66395	3.81748	4.36527	4.75388	3.70212	3.73138
Olfr1029	4.3835	4.54449	4.44806	4.51423	4.88616	4.60041	5.99315	6.96417	7.8178	6.11383	6.06906	8.41495	4.26244	5.51407	4.9425	3.95624	5.36998	5.1206	5.25774	4.72517	5.16706	5.24276	4.27999	4.25038	3.80312	4.60649	4.66191	4.16151	5.54827	4.62239	4.79927	4.87286	4.09134	4.57558	5.71171	4.7155	4.72324	4.86279	5.19704	5.07653
Olfr103	4.37412	4.60811	4.3574	4.27157	4.15658	4.09437	4.73977	4.31206	4.42373	4.19241	4.17437	4.57054	4.34115	4.20297	4.57657	4.63948	4.76856	4.43879	4.43445	4.17779	4.01649	4.26797	4.26232	4.16359	4.4509	4.2836	4.24156	4.02026	4.16708	3.91025	3.99114	4.20746	4.01053	4.40873	4.05416	4.19121	4.59711	4.33006	4.20259	4.26828
Olfr1030	4.20104	4.08787	4.17796	4.07649	3.98854	3.99387	3.82374	4.6434	4.69531	4.22885	4.16863	5.16642	3.91327	3.90076	3.96	4.11313	3.91567	3.98962	3.94617	4.12213	3.73743	3.87684	3.75881	3.69585	3.52707	4.13436	3.95904	3.76099	3.85774	3.8249	3.64307	3.8986	3.6473	3.6673	4.05433	3.74593	4.05354	4.23746	3.91338	4.15774
Olfr1031	3.85893	3.69753	3.8232	3.85803	3.87754	3.9241	3.77115	3.86355	3.86531	3.92884	3.63558	3.99251	3.80264	4.04991	3.82074	3.68492	3.88504	3.95975	3.77483	3.67052	3.52416	3.7855	3.6967	3.63669	3.87276	3.91666	3.6413	3.5392	3.84296	3.46184	3.65372	3.91727	3.61287	3.75575	4.19259	4.0349	3.91336	3.90415	3.77521	3.75186
Olfr1032	4.26039	4.23217	4.27495	4.25177	4.23217	4.19505	4.59675	4.80456	4.40691	4.63275	4.14414	4.64941	4.25284	4.17769	4.53678	4.15114	4.41201	3.87608	4.46829	4.36028	4.02399	4.34247	3.99034	4.12009	4.12898	4.16863	4.17523	4.17515	4.55994	4.16588	4.16587	4.19559	4.11791	4.98932	4.22611	4.3714	4.23766	4.31487	4.39508	4.12986
Olfr1033	3.21095	3.35464	3.24239	3.58519	3.35464	3.46588	3.53354	3.56097	3.36419	3.4719	3.69912	3.56497	3.81925	3.32788	3.33029	3.4519	3.53676	3.56042	3.32545	3.70584	3.30893	3.5026	3.24325	3.37322	3.27012	3.16454	3.14663	3.45856	3.35971	3.15758	3.21328	3.32987	3.26351	3.4697	3.91366	3.24059	3.63998	3.476	3.18571	3.31736
Olfr1034	5.16118	4.58928	4.73739	4.19516	4.94793	4.59186	4.54556	3.92457	4.62105	4.31643	4.19034	3.95514	4.0439	4.46892	4.23582	4.29764	4.759	3.85322	4.03024	4.81915	4.78864	4.25073	4.20483	4.14157	4.49377	4.89422	4.38318	4.76587	4.34556	4.55532	4.61648	4.24781	4.41464	4.59218	4.18258	4.49415	4.4124	4.77465	4.19561	4.34196
Olfr1036	5.16118	4.58928	4.73739	4.19516	4.94793	4.59186	4.54556	3.92457	4.62105	4.31643	4.19034	3.95514	4.0439	4.46892	4.23582	4.29764	4.759	3.85322	4.03024	4.81915	4.78864	4.25073	4.20483	4.14157	4.49377	4.89422	4.38318	4.76587	4.34556	4.55532	4.61648	4.24781	4.41464	4.59218	4.18258	4.49415	4.4124	4.77465	4.19561	4.34196
Olfr1037	3.32285	3.40535	3.41854	3.40535	3.50336	3.21672	3.24874	3.07909	3.56829	3.33961	3.18245	3.28533	3.4108	3.51879	3.33341	4.24595	3.50225	3.33352	3.40535	3.85744	3.24399	3.57515	3.25745	3.1765	3.39894	3.29135	3.34095	3.30632	3.60026	3.27212	3.1363	3.40535	3.38929	3.90005	3.79234	3.49733	3.38975	3.37993	3.23886	3.63104
Olfr1038-ps	3.62405	3.68019	3.73129	3.68593	3.41467	3.54587	3.73499	4.06844	4.36933	4.72312	4.10242	5.45561	3.913	3.68888	4.02871	3.66752	3.81131	3.97147	3.97443	4.0524	3.95502	3.82738	3.48375	3.61156	3.54272	3.86077	3.92477	3.82903	3.86082	3.67945	3.6523	3.6018	3.60987	4.14171	3.77817	3.98686	3.82738	3.69469	3.72861	4.03669
Olfr1039	2.77748	2.86588	2.89896	2.76309	2.75823	2.90404	2.97981	3.44371	3.62553	3.05757	2.94039	3.42235	2.90703	3.0511	3.43699	3.29065	3.3404	3.38554	3.1474	3.33947	3.01444	3.45117	2.88502	2.83356	3.02094	3.0511	2.75665	2.79294	3.05119	3.08602	2.82222	3.28388	2.91601	3.34988	3.213	3.00148	3.51583	3.14852	2.8871	3.26402
Olfr1040	4.71716	4.62071	4.74933	4.6625	4.66383	4.69421	4.66121	4.71866	4.4058	4.89394	4.51512	5.03303	4.63396	4.652	4.54325	4.44646	4.8446	4.54913	4.97793	4.90465	4.50174	5.05069	4.62892	4.34538	4.33686	4.90465	4.10773	4.75839	4.66121	4.5633	4.51151	4.86097	4.44536	4.44842	4.83093	4.66315	4.88979	4.66121	4.59104	4.33808
Olfr1042	5.45413	5.30526	5.00271	5.56389	5.1552	5.11621	4.59683	5.33344	5.145	4.74973	5.19879	5.11888	5.66769	5.60609	5.34938	6.06492	5.42426	6.09051	5.50557	5.67716	5.34986	6.28774	4.90536	4.72518	4.97592	5.31764	4.97902	5.16431	5.46902	4.96197	5.52894	5.20811	4.6804	5.03126	4.37705	4.76689	5.09839	5.31147	5.35604	4.98711
Olfr1043	4.8006	4.7627	4.69112	4.59763	4.63428	4.66095	4.61665	4.83991	4.84294	4.73359	5.0768	5.1722	4.69956	4.8389	4.51088	4.71911	4.93577	4.92487	4.77271	4.71341	4.22796	4.48133	4.26701	4.18838	4.57543	4.68869	4.28894	4.9778	4.49638	4.72412	4.72855	4.64507	4.45656	4.11705	4.62593	4.7657	4.88694	4.78449	5.26712	4.63381
Olfr1044	4.18453	4.36723	4.36571	4.41721	4.09929	3.99983	3.7865	3.88594	3.72678	3.92704	3.79255	3.96436	3.95065	4.44034	4.04157	4.17638	3.97509	4.18479	4.36723	4.22759	4.05433	4.19539	4.15457	3.85027	3.85202	4.02485	4.28099	3.94369	4.3288	4.31177	4.02485	4.11098	4.01779	4.69869	4.17968	4.24223	4.39964	4.0267	4.43305	4.33097
Olfr1045	4.61037	4.08247	4.13678	4.07562	4.29985	3.71122	4.07657	4.41912	4.65597	4.35034	4.6219	4.86552	3.84229	3.74553	3.91298	3.37453	4.38204	3.35185	3.71728	4.32798	4.11032	4.38306	3.95215	3.90427	4.00579	4.53036	3.61669	3.77011	4.70812	3.90892	3.96587	4.17517	4.11944	4.61955	4.16439	3.87773	4.28977	3.93598	4.19335	4.32319
Olfr1046	3.31753	3.30025	3.34651	3.13609	3.11179	3.0859	3.20366	3.0545	3.18275	3.02971	3.19247	3.35444	3.16034	3.37597	3.19113	3.32887	3.40497	3.33723	3.65331	3.18275	3.55082	3.72443	2.98464	3.03414	2.97124	3.38578	3.19569	2.99005	3.29877	3.21145	3.16291	2.85632	3.01747	3.35905	3.38195	3.18275	3.08292	3.35601	3.20316	2.9944
Olfr1047	2.94279	2.87081	2.96965	2.80727	2.88516	2.77825	2.84081	3.06163	3.13171	2.91991	2.92208	3.22716	2.96648	2.97851	2.98856	2.9909	2.78181	3.28632	2.92059	3.34373	2.9241	2.93388	2.76359	2.91975	2.89485	3.12638	2.74617	2.93747	2.9898	3.01158	2.91908	2.79589	2.8499	3.05267	3.45131	2.96997	2.91634	3.03011	2.92386	2.89907
Olfr1048	4.158	4.10774	4.03067	4.073	4.16449	3.97472	4.12044	3.99976	4.21716	3.90714	4.02578	4.27261	3.56277	3.96316	3.86918	3.9284	4.32593	4.11527	3.93326	4.41523	4.34877	4.62678	4.09753	3.98096	3.94815	3.98858	3.81971	3.85194	3.97908	4.18317	4.06345	4.03506	3.93102	4.69296	4.87922	3.86361	4.42067	4.07849	4.01063	4.68007
Olfr1049	2.99456	3.23524	2.78218	2.8646	2.993	2.91297	2.85708	2.78923	2.83674	2.65593	2.95623	2.62486	3.02264	3.71611	3.11849	3.66951	3.12656	3.12363	3.66571	2.92947	3.11173	3.37999	2.80626	3.04152	2.84361	3.38802	2.69861	2.86824	3.48313	3.10632	2.89845	3.05338	2.92047	4.24867	3.76526	2.97473	3.26899	2.95654	2.77067	2.84887
Olfr1051	3.2536	2.7086	2.93788	2.87918	2.65523	2.72152	2.80413	2.65661	2.895	2.72462	2.54222	2.95088	2.81318	3.08915	2.83743	3.66136	3.33276	3.56705	3.71091	3.03084	2.91596	3.58545	2.90613	3.05699	2.78684	2.95854	2.95159	2.70055	3.0706	2.81353	3.2363	2.72971	2.71881	3.31124	3.86129	3.35968	2.79439	2.88835	2.72146	2.97306
Olfr1052	3.87287	3.74236	3.70466	3.6552	3.59798	3.53148	3.37612	3.38609	3.57329	3.44461	3.61796	3.50424	3.65764	3.97189	3.95393	3.56298	3.74657	3.76381	3.65577	3.97749	3.73339	4.12191	3.60186	3.64827	3.64388	3.63238	4.03152	3.36485	3.9814	4.04314	3.76953	3.70391	3.60349	4.04728	4.40441	3.78157	3.6004	3.83606	3.94903	4.09004
Olfr1053	4.41824	4.68945	4.55665	4.3188	4.30239	3.90109	3.96737	4.1564	4.18368	4.39117	4.33307	4.4302	4.38867	4.57554	4.30653	4.31207	4.77231	4.49717	4.44278	5.02109	4.47745	4.98898	4.37654	3.99214	4.27631	4.74548	4.49717	4.36471	4.91607	4.09727	4.80486	4.49717	4.16975	5.60187	5.05917	4.33571	4.6274	4.60659	4.41282	4.69225
Olfr1054	4.43793	4.2677	4.59614	4.5146	4.40138	4.19942	4.34066	4.85369	4.59724	4.8133	4.68994	4.91516	4.31506	4.49704	4.35981	4.52441	4.55519	4.04559	4.44013	4.60139	4.51014	4.7445	4.48801	4.47479	4.20814	4.80048	4.5952	4.62108	4.44816	4.56227	4.07833	4.37854	4.42707	5.28129	4.55621	4.63324	4.72224	4.46623	4.58335	4.50968
Olfr1055	4.00545	3.60679	3.8828	3.57124	3.64315	3.48409	3.66321	3.4888	3.50641	3.74408	3.48153	3.82276	3.59611	3.79528	3.82007	3.63814	3.95213	3.90236	3.65451	3.95256	3.65026	3.63376	3.47335	3.58247	3.78314	3.76266	3.61119	3.55244	3.9267	3.72773	3.73973	3.70151	3.59754	4.49618	3.65827	3.56406	4.31756	3.85254	3.8242	3.7196
Olfr1056	4.45852	4.49278	4.29545	4.23807	4.26061	4.04161	4.25912	4.18937	3.97564	4.30545	4.28254	4.67237	3.6002	4.12889	3.99772	4.16262	3.79358	3.86167	4.26061	4.10476	4.45252	4.43357	4.09644	4.18212	4.188	4.07179	4.27348	4.21067	4.17468	4.16859	4.23217	4.51253	4.19452	4.93514	4.22987	4.35974	4.21203	4.48479	4.32147	4.13067
Olfr1057	4.12646	4.2678	4.22686	3.91424	4.23145	4.25451	4.30714	4.56183	4.61464	4.3106	4.56177	4.92022	4.16816	4.59271	4.64946	4.81406	4.3527	4.53454	4.30521	4.70791	4.23395	4.38764	4.20917	4.07069	4.06851	4.00017	4.18015	4.29426	4.48705	4.33557	4.06598	4.20797	4.02593	4.84435	4.24461	4.35587	4.47105	4.43294	4.19148	4.43158
Olfr1058	3.87169	3.81902	3.69237	3.73546	3.58652	3.54025	3.76718	4.14327	3.5351	3.97076	3.93925	4.55442	3.75982	4.11492	3.44353	3.88093	3.75573	3.97607	3.32005	3.85717	3.63017	4.22405	3.45493	3.37559	3.45171	3.42485	3.54186	3.7801	3.81211	3.56082	3.54294	3.39482	3.46511	3.57742	3.48381	3.44583	3.60756	3.88854	3.75691	3.35617
Olfr106-ps	3.21312	3.21312	3.18666	3.17011	3.06705	3.09828	3.13361	3.23676	3.01504	3.20656	3.1258	3.00613	3.11098	2.94479	3.32874	4.10578	4.59455	3.6191	3.75885	3.78579	3.47982	2.99123	3.11805	3.07496	2.99204	3.26202	3.06667	3.44594	3.4147	3.69698	3.06625	2.99523	3.14617	3.41531	3.55932	3.24201	3.38513	3.21406	3.21885	3.09047
Olfr1061	3.03084	2.90919	2.93254	3.11399	2.90202	3.01093	2.87032	3.10553	2.8007	2.87982	3.0136	3.27761	3.02189	2.97935	3.24041	3.19033	3.15122	3.23577	3.11116	3.45427	3.01987	3.11954	2.85266	2.94576	2.90881	2.99017	3.12366	2.74838	3.44714	3.07364	2.92853	2.95443	2.86206	3.97136	3.47915	2.89415	3.02722	3.19953	3.01242	3.06558
Olfr1062	4.65702	4.42214	4.35316	4.40862	4.29159	4.32956	4.14957	4.10817	4.19048	4.36319	4.0071	3.73948	4.0533	4.26064	3.80077	4.54425	4.35069	4.27872	4.30206	4.03989	4.64813	4.62829	4.05161	3.92834	4.03743	4.47398	4.16927	4.0839	3.19868	4.34253	4.0006	3.97761	4.05345	4.54813	4.48084	3.82584	4.04741	4.17788	3.83631	4.45056
Olfr1065	3.87169	3.81902	3.69237	3.73546	3.58652	3.54025	3.76718	4.14327	3.5351	3.97076	3.93925	4.55442	3.75982	4.11492	3.44353	3.88093	3.75573	3.97607	3.32005	3.85717	3.63017	4.22405	3.45493	3.37559	3.45171	3.42485	3.54186	3.7801	3.81211	3.56082	3.54294	3.39482	3.46511	3.57742	3.48381	3.44583	3.60756	3.88854	3.75691	3.35617
Olfr1066	3.0213	3.16227	3.10571	3.20008	3.02177	2.83432	3.06263	3.59161	3.78337	3.30124	3.11289	4.60715	3.10862	3.25326	3.14044	3.60064	3.06892	3.49122	3.1882	3.15402	3.04685	3.52406	2.91382	2.98585	2.95888	3.21114	2.91841	2.86169	3.25952	2.87326	2.98632	2.85005	2.85486	3.32487	3.1999	3.04542	3.00649	3.15797	3.03598	3.07382
Olfr107	3.41165	3.63492	3.36942	3.56064	3.65007	3.34621	3.32906	3.46938	3.09178	3.59379	3.25015	3.41755	4.07114	3.64206	4.40365	5.29493	4.55837	5.09406	4.29837	4.23568	3.47254	4.39545	3.37624	3.30833	3.42188	3.69075	3.51692	3.3472	3.5971	3.51495	3.49772	3.44573	3.2392	4.60827	4.17994	3.60411	3.5217	3.96246	3.44011	3.5338
Olfr1076	3.65854	3.59148	3.47026	3.47427	3.58566	3.69383	4.99783	5.66259	5.55357	5.30603	4.37513	6.97693	3.73137	3.81562	3.69464	4.29536	4.47336	3.59886	3.91056	4.78228	3.95031	4.34094	3.62406	3.45727	3.54965	4.19119	3.52768	3.45579	3.61045	3.72612	3.6159	3.32743	3.59505	3.76412	3.4643	3.7223	3.71084	4.12214	3.5359	3.52941
Olfr1077-ps1	4.73043	4.66506	4.84651	4.58012	4.77803	4.73816	4.57927	5.00934	5.15598	5.01683	4.83938	5.38652	4.70628	4.78117	4.6093	4.72445	4.67871	4.58026	4.62712	5.1798	5.20778	5.57456	4.72549	4.61972	4.65392	4.72888	4.55116	4.6885	4.88047	4.56226	4.57631	4.78085	4.68843	5.32395	5.28788	4.66243	4.91496	4.75334	4.78941	5.05575
Olfr1079	3.46444	3.38246	3.54508	3.47819	3.45002	3.39656	3.6181	3.43889	3.72186	3.59416	3.52739	4.38306	3.30429	3.66099	3.39129	3.69345	3.8958	3.76485	3.3947	3.86707	3.41626	3.53528	3.30515	3.20014	3.36788	3.54508	3.41509	3.54508	3.92544	3.4902	3.54334	3.38501	3.62387	3.64645	3.5713	3.62789	3.73256	3.71561	3.56531	3.54876
Olfr108	3.47709	3.40004	3.52423	3.6843	3.67245	3.59766	3.77144	3.98736	3.69244	4.06794	3.66074	4.50442	3.75637	3.84787	3.79059	4.45545	4.66107	5.6772	5.59677	3.94998	3.31615	3.69045	3.34619	3.31229	3.29022	3.52744	3.90353	3.4307	4.06017	3.53405	3.60194	3.68004	3.47688	3.7644	3.39046	3.74512	3.72001	3.60261	3.15913	3.82768
Olfr1080	3.02249	2.98462	3.05123	3.12108	2.93919	2.87329	3.04091	2.87506	3.24162	3.29531	2.87176	3.43066	3.04051	3.69788	3.07883	3.72401	3.31353	3.27661	3.17866	3.9003	3.17569	3.91458	2.80689	3.16996	3.01101	3.08974	3.10111	2.9959	3.4847	3.23726	3.05356	3.24687	2.96054	3.78008	3.54469	3.15899	2.94019	3.61544	3.0159	3.11411
Olfr1082	3.08689	3.05555	2.99055	2.94765	3.07564	2.91677	2.92787	2.98752	3.51588	3.35991	3.34519	3.45384	2.83481	2.92732	3.22155	3.04653	3.14963	3.17643	3.2607	3.44213	3.00591	3.6238	2.72073	2.73403	2.72179	2.94587	3.08188	2.775	3.52394	3.09444	2.91955	3.00663	2.74224	3.20991	3.08814	2.74518	3.46845	3.23262	2.76805	2.97392
Olfr1084	2.60861	2.71307	2.75723	2.75883	2.91697	2.79103	2.99106	3.06163	3.52278	3.27975	2.77887	4.92583	2.71216	3.16529	3.55549	3.13451	2.96607	3.4439	3.09789	3.11835	2.82938	2.78593	2.56196	2.7873	2.4871	2.93575	3.03411	2.56605	2.76592	2.60844	3.00293	2.75981	2.68597	4.28482	3.31214	2.72645	2.90586	3.27514	2.71434	3.0822
Olfr1085	4.5737	4.66004	4.76838	4.3066	4.5368	4.45207	4.31604	4.16419	4.28358	4.70864	5.26498	4.50167	4.51981	4.17079	4.31082	4.49412	5.16549	4.54162	4.89481	5.02332	5.5118	5.53052	4.51339	4.04577	4.04283	4.19306	4.35793	4.30297	4.65406	4.62751	4.36122	4.32946	4.5737	4.7751	5.42337	4.61548	5.32025	4.65979	5.11468	4.29357
Olfr1086	5.21968	4.88164	4.76614	4.94218	4.90965	4.78237	4.88345	4.75455	4.85278	4.57473	4.73141	4.38831	4.94484	5.08571	5.21599	5.64361	5.23645	5.0566	5.01069	4.97459	4.79977	5.53441	4.54575	4.46249	4.728	4.75758	4.73323	4.89514	4.854	5.24965	4.63204	4.91377	4.82503	5.12576	4.57603	5.04836	5.0482	4.55503	4.73338	4.61489
Olfr1087	3.70817	3.88182	3.72708	3.76451	3.93157	3.71595	3.82058	4.2629	3.70213	4.05572	3.79453	4.58383	3.71875	4.01735	3.84459	4.25733	4.02068	4.03166	3.964	4.53828	3.99098	4.17537	3.86857	3.76101	3.84099	3.94617	3.96375	3.92603	4.29333	3.57348	3.80026	3.94617	3.8043	4.05726	3.95992	3.76482	4.13266	3.94617	3.92566	4.42759
Olfr1089	4.20108	3.97734	4.16767	3.86486	3.99161	3.76393	4.12697	4.06126	4.18576	4.10468	4.0368	4.47524	4.09126	3.68631	4.13232	4.18031	3.86467	4.30278	4.41585	3.82994	4.12764	4.05502	3.66037	3.63911	3.89706	4.1641	3.72679	4.19203	4.41507	4.17769	3.80941	3.65411	3.88468	4.22734	3.95661	4.08879	3.94969	3.64309	3.8258	3.66726
Olfr109	5.317	5.32652	5.62336	5.40253	5.39321	5.27528	5.2058	4.93554	5.10052	4.98284	4.82886	4.61934	5.09847	5.22465	5.1843	6.81454	6.41859	6.67888	6.6991	4.80465	4.65382	5.22612	5.19735	5.0618	4.96285	5.44568	5.14927	5.34483	5.54242	5.38664	5.32934	5.16168	4.89309	5.39158	4.87337	5.65511	5.14614	5.24345	5.3131	5.10446
Olfr1090	3.78582	3.8175	3.68852	3.80898	3.75	3.6029	3.67111	4.00733	3.55255	3.80729	3.41894	4.34238	3.78582	4.19445	3.96853	3.85552	3.50778	3.61595	4.046	4.08597	3.93615	4.1548	3.57189	3.61986	3.56837	3.7809	3.81435	3.61914	3.82108	3.4541	3.71491	3.83229	3.71788	3.73257	3.95992	3.90466	3.62651	3.57327	3.63498	4.03185
Olfr1093	4.47195	4.487	4.51146	4.55315	4.49922	4.13554	4.12547	4.51802	4.31568	4.36048	4.28918	4.19868	4.57186	4.70132	4.79379	4.88881	4.39489	4.24408	4.51089	4.65379	4.4866	5.17937	4.51376	4.47807	4.69563	4.55315	4.37592	4.24619	4.61915	4.81295	4.49123	4.50015	4.54995	5.20441	4.9156	4.44903	4.88971	4.30675	4.43257	4.7029
Olfr1094	3.92599	3.77445	3.67233	3.69796	3.60181	3.69861	3.42424	3.46991	3.50883	3.26915	3.45674	3.49548	3.51525	3.84773	3.61653	3.8066	3.74424	3.70893	3.79307	4.03587	3.91824	4.12549	3.70375	3.40893	3.52293	3.74395	4.03198	3.86438	3.55503	3.74424	3.70195	3.80803	3.64075	4.15011	4.71417	3.70842	3.62905	4.20817	3.66518	3.70586
Olfr1095	3.52997	3.26042	3.44317	3.06896	3.32656	3.26196	2.95817	3.17512	2.93719	3.56922	3.02448	2.87234	2.70602	3.33412	3.27266	4.37697	4.2047	3.70508	3.50698	3.55828	3.71327	3.93141	3.16758	2.95946	2.98622	3.37072	3.22581	3.21633	3.11526	3.56189	3.20094	3.61078	3.21051	3.61657	3.76563	3.28621	4.19236	3.54538	3.50573	3.20003
Olfr1097	3.91509	3.82552	3.96869	3.67864	3.67211	3.67786	3.70643	3.89892	4.45955	3.95781	3.84998	4.62362	3.59999	3.59711	3.6282	3.69389	3.67146	3.83591	3.82631	3.83793	3.86209	4.33373	3.34702	3.44585	3.39498	3.65519	3.83844	3.45228	3.47367	4.26258	3.52169	3.70643	3.25843	3.54857	3.54889	3.90096	3.60408	3.73238	3.53053	3.71264
Olfr1098	4.03742	3.68138	3.63178	3.69049	3.59355	3.65869	3.60663	3.49452	3.78575	3.64326	3.67437	4.02917	3.62943	3.73635	4.05925	3.77344	3.4835	4.26323	3.3763	4.14644	3.59973	3.88218	3.49873	3.58093	3.68087	3.61703	3.49454	3.54497	3.6042	3.65409	3.51381	3.62637	3.4731	4.33472	3.65714	3.64405	3.57674	3.48818	3.97432	3.4691
Olfr1099	4.52707	4.51862	4.82747	4.38287	4.24264	4.17042	4.77532	4.8474	4.74951	5.23414	4.90007	4.97358	5.01362	4.77453	4.31975	4.74772	4.50971	4.99289	4.26263	5.15397	4.55207	4.90732	4.37679	4.06328	3.99033	4.53727	4.25609	4.66663	4.47754	4.54563	4.60646	4.76717	4.38205	4.05046	4.35834	4.55183	4.51431	4.83669	4.65408	4.5666
Olfr11	5.14575	5.11427	5.14575	4.82223	4.95319	5.00151	5.11949	5.10615	5.15978	4.92122	4.92084	5.05834	4.85286	4.75722	4.96547	5.393	5.16415	5.21085	5.28856	5.38627	5.37615	5.71267	4.92729	4.8625	4.96692	5.42979	4.68708	5.04928	5.21328	4.94018	5.15357	5.181	5.09233	5.96258	5.43047	5.25553	5.43642	4.9481	5.29698	5.10348
Olfr110	4.60742	4.5749	4.52534	4.45676	4.32933	4.5052	4.44852	4.66664	4.33576	4.33583	4.49452	4.8443	7.40694	6.97195	7.08163	5.94454	6.31396	6.98608	6.65368	4.7111	4.54386	4.90025	4.54163	4.3441	4.33068	4.61271	4.68758	4.42039	4.57021	4.49292	4.37732	4.32203	4.4933	4.54333	4.51965	4.68547	4.47702	4.77907	5.69477	5.01221
Olfr1100	3.36701	3.24084	3.22308	3.33138	3.19878	3.24416	3.5425	3.38937	4.16799	3.66808	3.37637	4.23118	3.22924	3.46298	3.41509	4.01798	3.42391	4.24584	3.65158	3.85977	3.50558	4.48222	3.23326	3.26619	3.09603	3.55889	3.20956	3.22619	3.8075	3.13242	3.44881	3.20664	3.17619	3.66262	3.3415	3.34151	3.48693	3.46589	3.27895	3.18454
Olfr1101	3.74881	3.75275	4.0436	3.82673	3.91322	3.80878	3.94499	3.93832	4.54258	4.25276	3.73833	4.40074	3.83371	3.86124	4.60465	4.16243	4.00298	4.11726	3.67084	3.96754	4.25336	4.40882	3.73499	3.6302	3.75228	3.9586	4.06504	3.81868	4.28162	4.0754	3.82081	3.85324	3.84416	4.6276	4.28666	4.74672	4.14091	3.7663	4.37554	3.63751
Olfr1102	3.12364	3.36824	3.30704	3.36901	3.00042	3.09707	3.0337	3.27443	3.53752	3.4126	3.28487	3.75126	2.97839	3.29196	3.55369	3.41796	3.3069	3.18527	3.12266	3.96448	2.88854	3.26452	3.09509	3.02095	2.99813	3.2127	2.99845	3.07984	3.34752	3.41518	3.26399	3.11425	3.0662	2.91555	3.20944	3.21898	3.29731	3.26792	3.35398	2.99866
Olfr1104	4.33802	4.11915	4.27317	4.28802	4.06942	3.97684	4.67928	4.70792	4.40675	4.28918	4.37294	5.02951	4.09769	4.19529	4.4861	4.19488	4.38409	4.10062	4.42721	4.55209	4.16892	4.53446	4.26347	4.1821	4.07386	4.36569	4.0817	4.39283	4.65694	4.49549	4.11416	4.0495	4.0772	4.15383	4.04457	4.70152	4.27172	4.1799	4.41746	4.26455
Olfr1105	4.65717	4.63881	4.75126	4.59259	4.46383	4.59539	4.48253	4.64884	4.60017	4.37679	4.6731	4.75058	4.63332	4.40137	4.69659	4.62956	4.44323	4.52698	4.88831	4.8805	4.72013	5.33631	4.59708	4.65822	4.5998	4.91381	4.58243	4.66517	5.12952	5.02669	4.84744	4.86755	4.65787	4.78599	4.33083	5.01449	5.25572	4.78187	5.16816	4.55722
Olfr1106	4.13939	4.25869	3.9313	4.19555	3.78156	4.19375	4.00113	4.41105	3.95033	4.10518	3.77059	4.24404	3.65584	3.85962	3.85027	3.64029	3.67374	3.6888	4.04198	3.8691	3.78613	3.8631	3.5284	3.63965	3.72584	3.7957	3.7515	3.93987	4.02953	3.88418	3.58269	3.85027	3.79947	3.98311	4.08935	4.10483	3.76314	3.94713	3.75687	3.9126
Olfr1107	3.35713	3.39311	3.43008	3.30074	3.15961	3.21917	3.63106	3.47512	3.68321	3.37224	3.35458	4.27727	3.42574	3.46673	3.64559	3.45166	3.37438	3.53413	3.72422	3.96779	3.80259	4.01649	3.0859	3.20158	3.23281	3.38942	3.33103	3.27664	3.07645	3.47749	3.19881	3.21608	3.20788	3.55611	3.42848	3.18724	3.28994	3.47175	3.53269	3.56509
Olfr1109	3.6199	3.43475	3.75324	3.42385	3.59468	3.31882	3.55724	3.45723	3.6142	3.62283	3.36905	3.98077	3.32066	3.6843	3.48851	3.13201	4.25964	4.16898	3.42883	4.16516	3.62694	4.00103	3.11326	3.22134	3.04188	3.39433	3.47175	3.39943	3.58429	3.67538	3.40963	3.36045	3.39227	4.53432	4.6475	3.59468	3.42159	3.4871	3.46767	3.66601
Olfr111	4.98581	4.8721	4.71164	5.10685	5.13685	4.70498	4.85468	5.10452	4.38943	4.80873	4.54095	4.92797	8.77946	8.86366	8.76886	8.35641	7.79559	8.49432	8.11219	4.79311	4.56857	4.87234	4.62052	4.67515	4.65284	5.32266	4.21487	4.82125	4.42565	4.15738	3.51151	4.03269	4.2331	4.04664	4.65625	4.38536	3.92174	5.15995	7.27381	6.27815
Olfr1110	3.94023	3.8045	3.82247	3.61664	3.75589	3.6747	4.28338	3.90935	4.03411	4.37387	4.13647	4.32352	4.02446	3.78272	4.23417	3.73087	3.59297	3.77998	3.88924	4.09119	3.85487	4.004	3.69399	3.57776	3.55255	4.0083	3.99349	3.87308	4.0864	4.66644	3.77327	4.20504	4.21051	4.5797	4.169	3.90396	4.28892	3.80905	3.74157	3.87427
Olfr1111	4.22314	4.11538	4.07774	4.10689	3.82494	3.97702	4.20612	4.53519	4.29661	4.15649	4.25154	4.43301	4.1578	4.4344	4.13909	4.10096	4.23813	4.59379	3.97355	4.2723	3.97295	4.2388	4.05607	4.02955	3.93609	4.00151	3.87333	4.03642	4.25105	4.06321	4.08262	3.97997	3.91792	4.57919	3.87101	3.97943	4.01236	4.30101	4.19732	3.85572
Olfr1112	3.40523	3.50925	3.57891	3.37808	3.30009	3.35747	3.5141	3.61592	3.50399	3.5835	3.36153	3.89542	3.39552	3.45305	3.73602	3.32282	3.59849	4.06756	3.58218	3.73002	3.39627	4.00269	3.34289	3.27096	3.24197	3.43383	3.38962	3.34044	3.74878	3.69566	3.37419	3.41382	3.18542	3.21072	3.6142	3.36696	3.68184	3.91233	3.5946	3.68121
Olfr1113	3.94334	4.06249	3.91392	4.19935	3.88437	3.91169	4.16553	4.39312	4.6867	4.56154	4.41652	5.30199	4.02057	4.24469	4.41483	4.6187	3.93364	4.75293	3.56657	4.33838	4.05274	4.484	3.78804	3.52617	3.58365	4.49783	3.88093	4.04384	3.76165	4.46802	4.0568	3.81663	3.90623	3.95272	4.15642	3.72199	4.21538	4.28238	4.20825	4.22879
Olfr1115	4.77674	4.72107	4.77099	4.75663	4.6123	4.63523	4.63392	4.99378	5.3435	4.8798	4.8961	5.10294	4.54961	4.69103	4.32846	4.72975	4.79133	4.50428	4.71692	5.04602	4.61056	5.16957	4.51312	4.48534	4.42006	4.71757	4.47143	4.69082	4.7734	4.77057	4.53104	4.61508	4.72975	5.08764	4.68413	4.83977	4.88354	4.75348	4.77453	4.58363
Olfr1116	3.43683	3.20768	3.37266	3.34074	3.29958	3.4437	3.60792	3.25161	3.74424	3.79348	3.42919	4.97192	3.50066	3.44153	3.28331	3.4479	3.58321	3.19812	3.1928	3.56999	3.27851	3.48474	2.98292	3.12972	3.04931	3.33699	3.10993	3.055	3.31715	3.28245	3.24223	3.21095	3.14726	3.91464	3.41583	3.05307	3.2933	3.14395	3.04715	3.30706
Olfr1118	4.23373	4.15196	4.26451	4.13021	4.13218	4.14553	4.69014	5.06452	4.64029	4.67142	4.52751	5.27877	3.90013	4.19051	4.41918	4.9722	4.88641	4.10788	4.20633	4.06681	3.89638	4.61128	4.07569	4.02721	3.96651	4.44117	4.15496	4.28167	4.3818	4.17647	4.26081	4.34751	4.08387	5.01551	4.28958	4.16412	4.59415	4.30553	4.30855	4.43158
Olfr112	3.50227	3.40336	3.44568	3.42947	3.63114	3.2488	3.38253	3.6206	3.49546	3.55597	3.3188	4.2363	6.81109	6.3785	7.03244	6.62252	6.43015	7.03613	6.83906	4.17389	3.58711	3.83436	3.20648	3.2313	3.04041	3.3913	3.33206	3.42398	3.65444	3.27024	3.31382	3.33558	3.42985	3.84048	3.47073	3.32247	3.38889	3.55686	3.26319	3.36762
Olfr1120	4.20396	4.14676	4.37864	4.3713	4.20396	4.10876	4.48582	4.57459	4.25778	4.21477	4.16863	4.71543	3.76664	4.26617	3.99117	4.07801	4.20294	4.31901	4.21933	4.16249	4.1323	3.94247	3.95181	3.97641	3.82981	4.41088	3.96661	4.21314	4.4398	4.35512	4.03206	4.20039	4.04934	4.74484	4.56733	4.44278	4.32465	4.41562	4.09952	4.32229
Olfr1121	3.81995	3.84577	3.85397	3.63612	3.80362	3.84107	3.72382	3.67124	3.53581	3.67877	3.74743	3.73893	3.9061	3.93255	3.64549	3.93834	3.98444	3.95228	3.85583	4.17832	3.99828	4.56367	3.81911	3.64955	3.75834	4.14154	4.35123	3.86475	3.79164	3.73411	3.7999	3.77736	3.67889	4.68914	3.82792	3.63325	4.05035	4.19566	3.91143	4.02411
Olfr1122	4.61447	4.57844	4.5349	4.37575	4.50057	4.55401	4.79366	4.80209	4.457	4.67063	4.38762	4.9024	4.79433	4.94352	4.3151	4.82136	4.67737	5.04948	4.87831	5.28225	4.79908	5.24776	4.31444	4.59544	4.42164	4.53798	4.63667	4.55071	4.77429	4.32132	4.38301	4.33444	4.36466	4.70726	4.62555	4.55807	4.56239	4.50073	4.51971	4.66392
Olfr1123	3.74319	3.65127	3.75664	3.67589	3.459	3.46828	3.27658	3.18254	3.19801	3.17878	3.23802	3.50207	3.25588	3.66294	3.29117	3.72401	3.5169	3.56655	3.40517	3.37473	3.02697	3.21381	3.5889	3.39014	3.46864	3.87755	3.38101	3.5186	3.63804	3.57671	3.43455	3.48498	3.35971	3.35155	3.68545	3.71334	3.46746	3.81517	3.67556	3.54962
Olfr1124	3.16748	3.22581	3.19455	3.28827	3.12272	3.39295	3.67204	4.29661	3.60213	3.95898	3.29453	4.62541	3.3671	3.03513	3.07592	3.752	3.25864	3.41337	3.39285	3.37933	3.51918	4.08973	3.02663	2.90443	2.98916	3.1869	3.14102	3.35845	3.4392	3.32014	3.08988	3.24233	3.00617	3.43161	3.18825	3.25744	3.19784	3.35155	2.98246	3.14667
Olfr1126	4.77343	4.58477	4.69346	4.61101	4.63267	4.66777	4.91739	5.0807	5.10926	5.19591	4.99299	5.3481	4.0701	4.62659	4.26806	4.89455	4.94324	4.95974	4.90988	4.77816	4.40185	4.85961	4.60012	4.32134	4.48824	4.87036	4.59912	4.51069	4.62722	4.62614	4.63285	4.54377	4.48402	4.85799	4.59895	4.87441	4.87926	4.93773	4.52502	4.74416
Olfr1128	5.1119	5.1026	4.93585	4.87027	4.70417	4.76901	5.04605	5.27039	5.33897	4.95807	5.16952	5.17989	4.62205	4.97189	5.08782	4.92584	4.80555	5.03047	4.66354	5.06713	5.22699	4.78668	4.71872	4.50838	4.53613	5.00696	4.84631	4.81928	4.73013	4.91334	4.90046	4.73333	4.66332	5.19382	5.37376	4.87896	5.01479	5.16156	4.99639	5.51626
Olfr1129	3.82834	3.80723	3.81451	3.80656	3.85212	3.81598	3.67845	3.79131	4.34756	4.09375	3.8285	4.55203	3.74576	3.67826	3.83087	4.10705	3.98981	4.18473	3.68193	3.74085	3.95499	3.57874	3.48907	3.4071	3.62144	3.87388	3.53966	3.49097	3.63877	3.811	3.57862	3.4668	3.41272	4.66218	3.72248	3.66346	3.91395	3.90553	3.97718	3.56954
Olfr113	5.24803	4.65573	5.09052	4.90415	5.16225	5.02158	5.49239	5.71908	5.88399	5.39038	5.54594	6.3809	6.8378	7.23122	6.80031	6.86202	6.8858	7.23704	7.64839	4.98297	4.83428	5.13515	4.73274	4.93401	5.14533	5.04954	5.03694	5.08813	4.98035	5.19963	4.98235	4.99022	5.24389	4.91772	5.44262	5.23483	5.49819	5.10722	5.55756	5.01167
Olfr1130	3.54071	3.53771	3.77418	3.43971	3.47693	3.60639	3.7273	3.64299	3.69342	3.66947	3.71684	4.32142	4.0311	4.05492	3.70458	4.60613	4.14216	4.18169	4.25275	4.2215	4.28929	4.5607	3.46513	3.49245	3.42145	3.82389	4.05609	3.70645	3.80443	3.90613	3.64425	3.49262	3.38681	4.02784	4.28936	4.04611	3.71276	3.79572	3.68899	3.57219
Olfr1131	4.41132	4.14869	4.04584	4.24013	4.21095	3.86822	4.29861	4.32087	4.07121	4.19341	4.06109	4.38638	3.65925	3.91275	4.19784	4.07055	3.92737	4.3619	3.57765	4.42229	3.85507	4.11745	3.82799	3.49854	3.58836	3.96469	3.74362	4.06582	4.41421	4.02804	4.01265	3.79477	3.79779	5.51308	4.09264	3.9278	3.76314	4.00059	4.01881	3.93479
Olfr1132	4.77011	4.52676	4.5262	4.39385	4.30223	4.33206	4.58361	4.4443	4.45089	4.17803	4.64307	4.29465	4.45483	3.86834	4.42208	4.62956	5.01525	4.61159	4.23991	5.14462	4.28062	5.21478	4.32428	4.41813	4.28672	4.24165	4.14895	4.00882	4.11385	4.72427	4.086	4.38548	4.47464	5.59193	4.55188	4.63076	4.47464	4.27353	4.64991	4.59484
Olfr1133	4.67873	4.65202	4.75793	4.69407	4.5736	4.59483	5.42499	4.92299	4.97472	4.99279	5.12331	5.05134	4.73652	4.64291	4.79128	5.33069	4.94324	4.79023	5.10382	5.14886	5.34185	5.11802	4.44471	4.644	4.68939	4.85517	4.667	4.56135	4.69135	4.86718	4.71108	4.70548	4.60477	5.20904	5.08612	4.66979	5.14942	5.0248	4.68071	4.62914
Olfr1134	3.72387	3.53606	3.75301	3.99288	3.90721	3.83452	3.32199	3.46328	3.43755	3.08632	3.65017	3.13068	3.57653	3.25019	3.46085	3.27369	3.37253	4.18835	3.44852	4.15403	3.60855	3.61797	3.28062	3.51825	3.07963	2.94106	3.92034	3.13132	3.47748	3.56313	3.07777	3.19468	3.17834	4.28172	4.18024	3.47736	4.06756	3.72397	3.24813	3.1765
Olfr1135	3.8511	3.53956	3.51256	3.71483	3.64024	3.34893	3.58615	3.31356	3.76721	4.14362	3.50882	3.62167	3.35514	3.6468	3.53049	4.36352	4.09933	3.69508	4.10724	4.56376	4.44279	4.36923	3.39001	3.25534	3.29639	3.49594	3.46904	3.51253	3.7819	3.4742	3.53919	3.52583	3.52064	3.44808	3.75463	3.28575	3.59838	3.71947	3.39986	3.5399
Olfr1136	4.53151	4.23281	4.20848	4.05721	4.05679	4.06151	4.5458	4.74172	4.55297	4.37986	4.28727	4.71106	4.0257	4.12093	4.37728	4.48633	4.25076	4.6367	4.53152	3.80403	4.13902	4.34233	4.16988	3.77574	4.02975	4.12832	4.07159	3.98186	4.45001	4.13711	4.13874	4.1262	3.93831	4.3321	4.45425	4.26908	4.3644	4.29205	4.26376	4.14356
Olfr1137	4.40099	4.47734	4.59162	4.53451	4.23217	4.36689	4.54759	4.63416	5.4713	5.17279	4.35632	5.18463	4.51616	4.47117	4.70412	4.34941	4.04369	4.31039	4.90457	4.89194	4.58603	4.56293	4.40445	4.19035	4.08649	4.54506	4.12707	3.88101	4.39662	4.69989	4.45374	4.33471	4.12303	4.88405	5.08816	4.31173	4.52056	4.77912	4.4626	4.75101
Olfr1138	4.20504	4.36974	4.0874	4.24277	4.22032	4.10217	4.07678	4.20386	4.23784	4.15137	4.06704	4.45268	4.21063	4.25381	4.14184	3.85228	4.09778	4.02409	4.0581	4.46917	3.89985	4.2294	4.13587	3.70349	4.19379	4.45656	4.16192	3.95807	4.07325	4.22235	4.09007	4.39234	3.91107	3.91352	4.76482	4.38763	4.12773	4.50888	4.25212	4.18144
Olfr114	3.98992	4.27349	4.11037	4.18366	3.97892	3.81325	4.39698	4.92184	4.51944	4.76273	4.46234	4.9008	6.7446	5.59735	6.66208	5.70203	6.03828	5.68328	5.79356	4.29243	4.27984	4.21599	3.99221	3.90152	3.83672	4.12857	4.03451	4.28331	4.19589	4.09148	4.08139	3.74246	3.83609	5.22771	4.68702	4.0098	4.67061	3.90764	4.25092	4.18529
Olfr1140	3.93764	3.90725	3.88076	3.84665	4.00113	3.95828	4.14393	4.28184	4.17887	4.18991	4.0264	5.33876	3.7059	3.77705	3.90807	4.01766	3.89564	3.76295	3.80118	4.30534	4.05445	4.61308	3.84967	3.815	3.95748	4.16213	3.73897	3.94499	4.23835	3.94612	3.77514	4.16135	3.56261	4.44213	3.72172	4.16428	4.18217	4.06626	3.93685	4.24873
Olfr1141	3.64971	3.69176	3.83535	3.89471	3.68516	3.65404	3.73578	3.77365	3.99843	4.02796	3.57089	4.33167	3.53777	3.844	3.41427	3.85552	3.93524	3.73443	3.6325	3.99796	3.77201	4.1186	3.51085	3.46977	3.38935	3.65084	3.97769	3.61579	3.52623	3.78992	3.5564	3.51591	3.48988	3.84089	3.72812	3.56581	3.62747	3.71207	3.6984	3.79104
Olfr1143	3.90869	3.94332	3.80355	3.8024	3.77194	3.39632	3.98725	3.91682	3.53985	3.8885	3.58057	4.64937	3.71953	3.52637	3.65165	3.53745	3.86322	3.68045	3.7879	3.845	3.91771	4.15645	3.4768	3.51447	3.57401	3.76084	3.6148	3.56045	3.83483	3.74648	3.60739	3.715	3.66491	3.52123	3.73665	3.71454	3.79455	3.5781	3.77782	3.57077
Olfr1145	4.19668	3.76274	4.1616	3.71024	3.83454	3.90059	3.74748	3.77395	3.94602	3.98862	4.16795	4.14219	3.92855	4.0538	4.16601	4.0098	4.1047	4.26349	4.03142	4.1486	3.89602	4.49435	3.97877	3.8419	3.94335	4.25656	3.76704	4.09937	4.10503	4.25632	3.84846	4.09984	3.79316	4.25401	4.15642	3.95606	4.25525	4.03797	3.97877	3.80104
Olfr1148	6.56596	6.96608	6.93639	6.97971	6.70073	6.72291	5.77983	5.82021	5.88274	5.97039	5.83035	5.88198	6.14984	5.45077	4.90891	5.44731	4.7374	5.50187	5.78209	5.48382	5.79625	6.21534	5.81111	6.3336	6.41634	5.91414	5.65467	6.09365	5.54011	5.45316	5.66752	5.92122	5.84129	4.99662	4.82892	5.98708	5.46873	6.53893	5.87158	5.6703
Olfr115	5.12626	5.09277	5.29349	5.27743	4.98631	4.81446	4.61921	4.69119	4.46824	4.71731	4.74572	4.42816	6.08481	5.7508	5.60581	5.61581	5.62786	5.89254	5.67017	4.72938	4.51426	5.11045	4.57995	4.74483	4.55418	4.70459	4.75209	4.68848	4.90177	4.64764	4.74232	4.60696	4.66402	4.68314	4.39126	4.60397	4.81058	5.10685	4.7014	4.57277
Olfr1151	4.46059	3.91874	4.02989	3.97698	4.03194	3.9219	4.02561	4.28523	4.62781	4.22224	3.87018	4.65716	4.08329	4.22771	4.06293	4.40387	4.07759	3.87057	4.62614	4.58918	3.95003	4.04553	3.87458	3.93746	3.68064	4.43524	4.02561	4.19436	4.27714	4.22547	3.90558	4.25848	4.04016	4.51791	4.1774	3.93704	3.86402	4.14479	4.21204	4.1895
Olfr1152	5.90881	5.97994	6.13927	6.14703	6.04175	6.3471	6.24369	6.22184	6.26782	6.26236	6.26112	6.17141	5.97601	5.99037	5.91033	5.72677	6.05625	6.50676	6.54801	7.2105	6.71429	6.46212	5.93584	5.67633	5.87966	6.09777	6.27316	6.17843	5.41689	5.90593	6.42015	6.33938	5.91726	5.74096	6.26261	5.98612	6.75307	6.42262	5.85063	5.93341
Olfr1153	4.59696	4.34779	4.58637	4.36242	4.34907	4.39652	4.21529	4.34743	4.68852	4.41083	4.27946	4.85722	4.20585	4.75484	4.42484	4.09619	4.4575	3.98817	4.33947	4.34907	4.22814	4.78591	4.22726	4.12215	4.18901	4.34227	4.26088	4.12436	4.54781	4.7373	4.22766	4.41849	3.97653	4.39346	4.49475	4.43965	4.38623	4.91843	4.35764	4.53406
Olfr1154	3.88317	3.84156	3.71397	3.77422	3.89659	3.63906	3.87944	3.99048	4.55136	3.89859	3.71579	4.7547	3.84229	3.77844	3.92648	3.92875	3.82494	4.3192	4.09427	3.94661	3.90954	4.14854	3.64328	3.66638	3.55229	3.77443	3.8521	3.82193	4.29929	3.99053	3.76967	3.87545	3.59968	5.10529	4.59026	3.68912	4.21102	4.08423	3.86514	4.08009
Olfr1155	5.63801	5.40599	5.52413	5.68868	5.29021	5.22714	5.28447	5.38875	5.40614	5.51384	5.40591	5.54881	5.22111	5.37727	5.54939	5.4737	5.13044	5.8526	5.37644	5.45848	5.53817	5.85082	5.34053	5.26434	5.22258	5.45141	5.47871	5.20695	5.52839	5.63025	5.37391	5.418	5.30212	5.6456	5.9065	5.56372	5.65946	5.83205	5.32794	5.46143
Olfr1156	4.65482	4.75116	4.77579	4.84659	4.57251	4.66049	4.9288	4.66049	5.03339	4.81022	4.62053	4.53654	4.64705	4.96931	4.81691	5.06387	5.35848	5.05173	4.6718	5.00712	5.25836	5.01048	4.65159	4.5062	4.63376	4.80053	4.6412	4.61287	5.09989	4.65571	4.78878	4.96551	4.73678	4.63203	4.80975	5.06776	4.80309	5.32002	4.86526	4.67763
Olfr1157	4.39335	4.165	4.39275	4.30947	4.13919	3.9443	3.76314	3.95825	3.80738	3.82993	3.91958	3.90948	4.30908	4.04836	3.86851	3.90124	4.14759	4.48791	4.04621	3.92286	4.20031	4.33772	4.23854	4.16561	4.32586	4.48144	4.29177	4.10804	4.25414	4.34662	4.11295	4.10853	3.94863	4.74295	4.1797	4.19874	4.67758	4.70695	4.24578	4.26265
Olfr1158	4.20104	3.96789	4.50901	4.15629	3.9522	4.18773	4.18475	4.37252	4.20277	4.21191	4.16668	4.82591	3.42867	3.79366	4.07465	4.39424	3.9703	3.98888	3.97574	4.01966	3.95675	4.02899	3.90614	3.68359	3.79138	3.98237	3.70366	3.99008	4.01792	3.92833	3.50876	3.8408	3.84559	3.98237	3.91559	4.08817	4.14563	3.92553	3.9992	4.34471
Olfr116	3.83946	3.6578	3.94985	3.73263	3.90152	3.74907	3.89434	3.80404	3.77366	4.06748	4.01542	4.01221	4.3314	4.25471	3.96922	4.28651	4.2767	4.56165	4.47396	3.89561	3.69434	3.98531	3.6929	3.58691	3.69586	3.84279	3.53159	3.92819	3.67309	3.84017	3.7689	3.73128	3.68364	4.44223	4.33155	3.68705	4.09728	4.4124	4.27223	3.91107
Olfr1160	3.33877	3.36098	3.22947	3.00325	3.03096	3.13589	4.55367	4.71703	4.14507	4.97119	3.78642	5.6817	2.76858	2.757	3.26605	3.31359	2.87314	3.62813	3.00002	3.14318	2.95419	3.0495	2.90442	2.86253	3.23061	3.38899	2.72957	2.88937	3.98306	3.50793	3.33182	2.96082	2.95592	3.89391	3.48372	2.95971	2.82513	2.98369	3.08841	3.01632
Olfr1161	3.94758	3.99189	4.27419	4.07518	3.86547	3.8219	3.67322	3.76906	3.57914	3.8345	3.87225	3.77645	4.08332	3.7248	3.91513	3.89599	3.86322	3.84785	4.07195	4.16119	4.02299	4.86336	3.92683	3.82025	3.69249	4.01919	3.80317	3.82725	3.99343	3.76072	3.72902	3.76151	3.62973	4.70824	3.94006	3.74628	3.92047	4.06818	3.86638	4.09503
Olfr1162	5.55139	5.48341	5.24	5.34443	5.25574	5.11721	4.7364	4.78992	4.73513	4.95936	4.60575	5.14655	4.84034	4.58034	4.80483	4.68161	4.64203	4.7136	4.96988	4.76922	5.19242	5.11207	4.86956	4.93759	4.78967	5.01787	4.97353	4.82714	5.3613	5.17927	4.63134	4.9904	4.94829	4.88425	5.4161	4.9904	5.20523	5.1174	4.88826	4.86358
Olfr1163	5.55139	5.48341	5.24	5.34443	5.25574	5.11721	4.7364	4.78992	4.73513	4.95936	4.60575	5.14655	4.84034	4.58034	4.80483	4.68161	4.64203	4.7136	4.96988	4.76922	5.19242	5.11207	4.86956	4.93759	4.78967	5.01787	4.97353	4.82714	5.3613	5.17927	4.63134	4.9904	4.94829	4.88425	5.4161	4.9904	5.20523	5.1174	4.88826	4.86358
Olfr1164	3.87944	3.53557	3.95725	3.84943	3.66942	3.8467	3.77757	3.44384	3.51326	3.49617	3.32643	3.73034	4.22455	3.62032	3.63468	3.84943	3.62842	3.98962	3.94931	4.51764	3.83242	4.65288	3.96574	3.74718	3.87195	3.55448	3.67004	3.62689	3.70452	3.78914	3.94032	3.56937	3.79954	4.35358	4.16422	4.21956	3.963	3.48959	3.84747	3.59523
Olfr1166	4.21004	4.16971	4.03564	3.88383	4.16677	4.26877	4.31432	4.16758	5.04711	5.33651	4.42901	4.86092	4.24006	3.90771	3.71498	3.53757	3.83251	3.49284	3.61658	4.49989	3.71718	3.91706	3.69551	3.57794	3.69068	4.17251	3.71973	3.841	3.70293	3.96588	3.573	3.75794	3.75235	4.25129	4.25252	4.23802	3.79481	4.04288	3.87163	3.82526
Olfr1167	4.06184	3.42547	3.16363	3.23737	3.17923	3.29381	3.19374	3.22988	3.75905	3.62122	3.25884	4.21791	2.97364	2.96658	3.27992	3.38031	3.37984	3.44851	3.30738	3.91334	3.38165	3.55501	3.12754	3.32359	3.12438	3.05478	3.06506	3.16445	3.68577	3.04534	3.278	3.27476	3.33731	3.41308	3.29029	3.33272	3.29304	3.4461	3.14014	3.18704
Olfr1168	3.94727	4.30275	4.15927	4.26983	4.14984	4.21951	4.04897	3.96405	3.76682	4.03515	3.73923	4.02065	4.25332	4.20766	4.14233	4.17118	4.22491	4.10257	4.03024	4.56145	3.99974	4.63217	3.82297	3.86709	3.78674	4.23888	3.995	3.80667	4.26498	4.00972	3.90131	4.14516	3.95438	4.87618	4.47064	3.90162	4.44332	4.3777	4.10257	3.90705
Olfr117	3.96374	4.14028	4.05836	4.11788	3.99746	4.17487	3.93653	4.1095	3.93992	3.81117	3.88498	3.8538	4.29098	3.85642	3.87013	4.3496	4.21754	3.98321	4.13951	4.01267	3.82852	4.19842	4.05326	3.75244	3.789	4.00215	3.95249	4.23488	4.23044	4.25086	3.96054	3.9616	3.94863	4.17576	4.88976	4.08794	3.98715	4.11708	4.08002	4.35019
Olfr1170	4.25099	4.6204	4.31456	4.14051	3.99678	4.23821	3.85115	3.86884	3.91308	3.98975	3.79946	4.15268	3.76703	3.88359	3.87233	3.88128	4.04206	3.85081	3.86852	3.95252	3.9357	4.27022	3.75767	3.84387	3.72164	3.78258	4.15073	3.93489	3.63406	3.78217	3.86352	3.94058	3.70081	3.99417	3.8458	3.94701	3.76113	4.03686	3.96865	4.0534
Olfr1173	3.83913	3.69836	3.61337	4.09167	3.80981	3.54321	3.58174	3.77766	3.79238	3.67865	3.69947	3.96345	3.81367	3.7358	3.74398	3.53864	3.71301	3.92402	3.64684	3.92299	4.24934	4.17501	3.52755	3.48944	3.38665	3.91584	3.59199	3.55056	4.07769	3.50426	3.57529	3.58062	3.52552	3.88213	3.93188	3.42262	3.89883	3.82528	3.42884	3.31568
Olfr1174-ps	8.4994	8.23468	8.34532	7.90567	7.98303	7.95483	8.3673	8.46148	8.30424	8.32833	8.30324	8.17842	8.10939	7.8556	8.00534	8.07614	8.32872	8.1331	8.04354	7.623	7.73595	7.94362	8.36173	7.97678	8.2836	9.15772	8.43644	8.58799	8.05042	8.59971	8.39647	8.39838	8.28844	8.21321	7.68118	9.10473	8.34835	9.75982	10.1973	9.54098
Olfr1176	3.91392	3.83589	3.66771	3.60951	3.85755	3.66089	3.58909	3.62557	3.63466	3.72773	3.34041	3.64012	3.77013	3.34505	3.56498	3.87953	3.65029	3.86416	4.0069	3.87478	3.74489	4.37314	3.45673	3.47009	3.37131	3.66713	3.47773	3.49388	3.95018	3.69889	3.56582	3.75203	3.42077	4.16577	3.95512	3.73744	3.69657	3.62894	3.53953	3.86109
Olfr1178	3.63343	3.8453	3.81662	3.6004	3.65218	3.37239	4.22602	4.10776	4.27432	4.15543	3.67938	5.18557	3.56922	3.84787	3.98862	3.95051	3.82504	3.68584	3.75005	4.08074	3.46202	4.19955	3.51987	3.60995	3.50881	3.56313	3.71117	3.47554	3.71046	3.52332	3.6507	3.5565	3.36145	3.77803	3.77703	3.60803	3.73975	3.73864	3.85783	3.71117
Olfr1179	4.65129	4.4794	4.46611	4.3809	4.86484	4.8346	4.66102	4.90646	5.0755	5.08118	4.79386	4.45152	4.71787	4.87283	4.65575	4.64152	4.72272	4.63418	4.3565	4.82161	4.95546	5.42277	4.28469	4.47015	4.26341	4.62956	4.49417	4.23832	4.93941	5.00434	4.52815	4.57875	4.36319	5.33665	4.28815	4.66751	4.92923	5.2453	4.61615	4.61955
Olfr118	4.0321	4.25356	3.82596	3.78211	4.20396	4.0529	4.46177	3.93822	3.68854	3.95372	4.21063	3.79937	4.22829	4.19566	4.05821	4.67906	4.66405	4.28758	3.90323	4.67751	4.49858	5.38293	4.14029	4.35086	3.75296	4.389	3.56896	4.10396	4.81078	4.02271	3.81289	4.05429	3.80283	5.66381	5.33688	3.7691	3.86729	4.30745	3.74009	4.5773
Olfr1180	3.90089	3.87537	3.82573	3.59731	3.74579	3.75627	3.8565	3.73625	3.96707	3.80219	3.82465	4.42606	3.58576	3.75658	3.58869	3.69654	3.92597	3.97444	3.76632	3.39259	3.70166	3.78587	3.614	3.4549	3.54853	3.97054	3.77943	3.31899	3.77641	3.60911	3.60044	3.7723	3.53761	4.3295	4.11385	3.74936	3.54428	3.71871	3.92177	3.55185
Olfr1181	3.15809	3.403	3.5262	3.33519	3.62602	3.14307	4.78988	4.98817	5.34685	4.35895	3.80523	6.88249	3.5193	3.52287	3.19082	3.20754	3.55349	3.81139	3.42357	3.87358	3.6272	4.35851	3.20249	3.30283	3.27638	3.30636	3.18678	3.56457	3.66903	3.69881	3.11617	3.28447	3.19834	4.12105	3.49792	3.48301	4.12802	3.37787	3.17107	3.41951
Olfr1182	4.00059	4.33016	4.24093	4.14105	4.14781	3.79142	4.75496	5.56676	5.91589	5.46008	4.80785	6.60393	4.16182	4.39267	4.12456	4.48723	4.19316	4.61501	4.03168	4.41194	4.20018	4.74352	3.90044	3.79527	3.65536	3.79788	3.60512	3.94349	4.40809	4.24911	3.86322	3.9128	3.83487	4.37329	4.79832	4.12984	4.24823	3.71776	3.93104	3.81092
Olfr1183	3.33178	3.18502	3.23471	2.9325	3.11928	3.11009	3.42424	3.51321	4.25915	3.91803	3.66442	5.3934	3.25881	3.38495	3.58529	3.74654	3.30095	3.67084	3.52985	3.54651	3.39627	3.92565	3.0764	3.22384	3.04174	3.37386	3.14292	3.15867	3.37386	3.22131	2.9196	3.12582	2.91179	3.70113	3.59104	3.18513	3.30353	4.15098	3.48311	3.93259
Olfr1184	3.96646	4.00736	3.80092	3.5656	3.6315	3.68506	3.61717	3.48256	3.42851	3.54547	3.64768	3.73612	3.51773	3.64795	3.68511	3.58987	3.55499	3.48131	3.39706	3.91332	3.41912	4.44686	3.38731	3.40293	3.40185	3.51508	3.32842	3.45364	3.42538	3.80035	3.52384	3.63657	3.37496	3.27843	3.51446	3.75418	3.5437	3.78967	3.71957	3.60456
Olfr1186	3.36149	3.41587	3.57845	3.51376	3.54642	3.47276	3.39179	3.32424	3.6456	3.31524	3.53312	3.52619	3.1241	3.25972	3.44824	3.37565	3.69781	3.47925	3.46159	3.59612	3.20629	3.59929	3.11104	3.10469	3.06924	3.28258	3.39589	3.21984	3.54047	3.34829	3.24359	3.32073	3.07253	3.35576	3.59055	3.32732	3.74209	3.8962	3.2475	3.27488
Olfr1188	4.2066	4.44793	4.46496	4.11032	4.43648	4.44184	4.28544	4.34634	4.37197	4.30546	4.59596	4.18436	4.09882	4.03356	3.8569	4.38801	4.34873	4.38213	3.91372	4.54357	4.0683	4.32187	4.28794	3.97036	4.02389	4.25951	4.11562	3.96597	4.31129	4.48174	4.06669	3.94044	3.92673	4.15663	4.45595	4.17842	4.28162	4.23044	4.16053	4.75996
Olfr1189	3.83049	3.57952	3.78123	3.77876	3.66727	3.6571	3.57833	3.76235	3.6679	3.78734	3.54061	3.67234	3.52367	3.73081	3.52273	4.23694	3.33791	3.77057	3.8765	4.23446	4.0208	4.35682	3.58128	3.54309	3.42652	3.60559	3.63051	3.60063	3.68231	3.58684	3.63475	3.70652	3.51119	3.91263	3.71522	3.72712	3.98621	4.071	4.07109	3.42958
Olfr119	3.62841	3.7637	3.86982	3.52082	3.5989	3.68932	4.60755	4.22935	4.07336	4.35529	4.25759	4.45768	3.96858	4.21997	3.73359	4.28929	3.97167	3.91961	3.88951	4.89271	3.95474	4.68093	3.80798	3.62942	3.69368	3.97538	4.15685	3.86796	4.03861	4.08116	3.94323	4.03155	3.68084	4.04086	4.93582	3.5715	4.39374	4.37948	4.00768	4.28794
Olfr1193	3.89477	3.7013	3.62548	3.99677	3.67451	3.5989	4.66043	4.45738	4.62736	4.51531	4.11539	5.33866	4.07568	4.37361	4.28701	3.84093	3.85693	3.90309	3.8586	4.42716	3.71125	3.63119	3.85087	3.49332	3.73012	4.02558	3.49413	3.8995	3.39581	3.50748	3.90461	4.19941	3.70275	3.8989	3.94739	3.99781	4.07614	3.93557	4.04166	3.70963
Olfr1195	3.54233	3.42036	3.41883	3.33455	3.36463	3.26601	3.36678	3.42291	3.48402	3.36178	2.9859	3.37357	3.37591	3.12049	3.48491	3.47921	3.64645	3.75901	3.62613	3.85252	3.6545	3.93264	3.33412	3.23381	3.18338	3.30507	3.35234	3.27687	3.63715	3.50375	3.39529	3.48561	3.1555	3.31421	3.32259	3.36462	3.92377	3.67504	3.71012	3.53133
Olfr1196	4.86772	4.5437	4.44625	4.38901	4.35293	4.40805	4.43464	4.65809	5.05424	4.86329	4.61374	5.52614	4.35124	4.21803	4.61087	4.44625	4.19686	4.48844	4.71592	4.18972	4.17692	4.41643	4.50926	4.24229	4.23169	4.39578	4.60664	4.44625	4.33355	4.64819	4.33603	4.23808	4.12607	4.47601	4.87089	4.4321	4.64553	5.13589	4.65556	4.66883
Olfr1197	4.86772	4.5437	4.44625	4.38901	4.35293	4.40805	4.43464	4.65809	5.05424	4.86329	4.61374	5.52614	4.35124	4.21803	4.61087	4.44625	4.19686	4.48844	4.71592	4.18972	4.17692	4.41643	4.50926	4.24229	4.23169	4.39578	4.60664	4.44625	4.33355	4.64819	4.33603	4.23808	4.12607	4.47601	4.87089	4.4321	4.64553	5.13589	4.65556	4.66883
Olfr1198	3.24839	3.27877	3.3408	3.23486	3.1188	3.10967	3.46577	3.0658	3.49105	3.29626	3.3143	3.79558	3.28179	3.59298	3.48957	3.37393	3.30232	3.5423	3.50665	4.05698	3.32852	4.01476	3.37976	3.28316	3.47863	3.58174	3.43223	3.33709	3.56175	3.71147	3.27763	3.55797	3.27361	4.07814	3.72803	3.52031	3.14912	3.34412	3.15089	3.56181
Olfr1199	3.31727	3.12034	3.14335	3.11401	3.02419	3.05608	3.66152	3.79891	3.6491	4.32598	3.40812	4.88212	3.14364	3.1849	3.80366	3.91807	3.32439	3.5573	3.20924	4.38183	3.39288	4.06248	3.16847	3.1062	3.02135	2.97456	3.04405	2.94076	3.07163	3.23041	3.3763	3.11902	3.0125	4.20021	3.15109	3.30352	3.01813	3.46	2.86127	2.99238
Olfr12	5.37756	5.26574	5.40745	5.11651	5.2926	5.2926	5.41233	5.46444	5.80257	5.45659	5.2926	5.12801	5.36839	5.14319	5.2064	5.20593	5.3996	5.15906	5.1517	5.5368	5.41912	5.23024	5.20641	5.20694	5.2926	5.34233	5.02299	5.38096	4.99991	5.61636	5.15336	5.16075	5.34168	4.97921	5.24802	5.86694	5.0702	5.62252	5.36837	5.16856
Olfr120	3.83133	4.23719	4.16799	4.04401	3.89834	3.88809	4.13449	4.1993	3.67975	4.31879	4.02723	3.73067	3.71405	3.57825	3.51738	3.80566	3.78789	4.10806	3.85363	3.85522	3.77222	4.3277	3.82289	3.6286	3.81556	4.36947	4.39406	4.17102	4.33239	4.16039	3.82037	3.85569	4.24188	4.12804	3.78666	4.48947	3.88034	4.4732	4.13106	4.17016
Olfr1200	5.32593	5.06459	5.49358	5.0445	5.20049	5.04178	5.07112	5.01129	6.30419	5.87528	5.5187	7.0004	5.3725	5.03219	4.53957	4.8238	4.14488	4.81247	4.7	4.83906	4.71458	5.07744	4.87692	4.94389	4.67359	4.94725	4.60314	5.125	4.74069	5.0364	4.37336	5.06245	4.7412	4.8852	4.45869	5.31964	5.03832	5.10059	5.28785	4.96957
Olfr1201	4.76943	4.60831	4.75619	4.77006	4.43311	4.38938	4.19218	4.03798	4.40663	4.24754	4.19175	5.19009	4.00536	4.15364	4.31699	4.2074	4.12464	4.35561	4.03024	4.40998	4.27187	4.35052	4.05034	4.12127	4.05544	3.98889	4.0163	4.12004	4.56293	4.00972	4.2163	4.17499	3.99407	4.95288	4.25537	3.92194	4.12218	4.72056	4.32439	4.21537
Olfr1202	3.64709	3.50157	3.76318	3.67783	3.81505	3.55555	3.47554	3.98357	4.50183	3.94632	3.93402	4.5796	3.63925	3.59308	3.62976	4.37467	3.59115	3.75523	3.70027	3.57492	3.68818	3.81284	3.63254	3.41867	3.42374	3.77733	3.52825	3.5651	3.62355	3.6023	3.53534	3.31803	3.38487	4.09032	3.76763	3.76007	3.73663	3.86363	3.62801	3.78379
Olfr1204	3.56145	3.70559	3.61245	3.67524	3.46611	3.33267	3.56613	3.39334	3.3936	3.37934	3.30441	3.80107	3.50345	3.8105	3.46187	4.08878	3.61992	4.40071	3.70162	3.66704	3.82504	3.87644	3.885	3.59112	3.41532	3.30384	3.65974	3.49248	3.81242	3.70155	3.48831	3.50648	3.53133	4.19108	4.34357	3.59372	3.43284	3.66049	3.40623	3.39313
Olfr1205	4.76943	4.60831	4.75619	4.77006	4.43311	4.38938	4.19218	4.03798	4.40663	4.24754	4.19175	5.19009	4.00536	4.15364	4.31699	4.2074	4.12464	4.35561	4.03024	4.40998	4.27187	4.35052	4.05034	4.12127	4.05544	3.98889	4.0163	4.12004	4.56293	4.00972	4.2163	4.17499	3.99407	4.95288	4.25537	3.92194	4.12218	4.72056	4.32439	4.21537
Olfr1206	4.76943	4.60831	4.75619	4.77006	4.43311	4.38938	4.19218	4.03798	4.40663	4.24754	4.19175	5.19009	4.00536	4.15364	4.31699	4.2074	4.12464	4.35561	4.03024	4.40998	4.27187	4.35052	4.05034	4.12127	4.05544	3.98889	4.0163	4.12004	4.56293	4.00972	4.2163	4.17499	3.99407	4.95288	4.25537	3.92194	4.12218	4.72056	4.32439	4.21537
Olfr1208	3.93354	4.01151	3.69705	3.80223	3.81513	3.88718	3.56107	3.65059	3.48602	3.77581	3.58943	4.3067	3.99647	4.05803	3.52824	3.43743	3.43944	3.71303	3.73615	4.08471	3.74578	4.34764	3.62191	3.51682	3.50099	3.66498	3.77734	3.78014	3.72737	3.66036	3.80842	4.17386	3.64689	4.71714	3.71802	3.93446	3.89899	3.85781	3.43665	3.89733
Olfr1209	4.62647	4.25583	4.47864	4.65591	4.4322	4.46559	4.3928	4.44703	4.39502	4.57323	4.32445	5.25313	3.95299	4.33389	4.44507	4.29527	4.38014	4.15156	4.24781	4.44165	4.41972	4.4401	4.45591	4.21296	4.32111	4.28223	4.51123	4.52271	4.44397	4.81624	4.28927	4.28969	4.35169	4.39732	4.56864	4.70295	4.75121	4.46008	4.3108	4.51176
Olfr121	4.23928	4.07835	4.01062	4.51126	4.12323	4.41209	4.02653	4.60957	5.11134	4.85265	4.78432	5.17054	4.87388	4.16558	4.47265	4.84322	4.55123	4.27539	4.39928	5.06214	4.49572	4.22317	3.95724	3.84611	3.59833	4.27667	4.05934	4.07505	3.81937	3.87657	3.87033	3.90629	4.09301	4.82002	4.60825	3.78725	4.25704	4.12236	4.15269	4.1548
Olfr1211	3.69406	3.82706	3.68714	3.83066	3.64085	3.67209	3.95146	3.92438	4.42729	3.7953	4.01124	4.78228	3.60009	4.06779	3.87728	3.82084	3.95179	3.88	3.54446	3.77897	3.75534	3.76994	3.72108	3.6718	3.8033	3.66229	3.81861	3.7659	3.84569	3.86873	3.70157	3.67467	3.62178	4.16978	3.73971	3.93484	3.93941	3.79636	3.81513	3.82342
Olfr1212	3.2423	3.20556	3.17563	3.1688	3.10143	3.2353	3.31067	3.11783	3.34979	3.26051	3.37286	3.53506	3.44279	3.14892	3.20556	3.24406	3.00762	3.13372	2.94795	3.50875	3.07516	3.61124	3.16346	2.96978	3.00404	3.20599	3.01808	3.32579	3.35049	3.5643	3.2423	3.10861	3.2556	3.41725	3.37683	3.07543	3.53648	3.85863	3.10181	3.0014
Olfr1213	3.61335	4.11768	3.93406	3.48308	3.72445	3.71184	3.72204	3.799	4.18358	4.05663	3.93545	4.53384	3.77982	3.74432	3.96814	3.93513	4.11474	4.34528	3.53295	4.90512	3.9496	4.34396	3.69842	3.41859	3.57977	3.68278	3.81627	3.71228	3.4204	3.91788	3.70033	3.35704	3.73103	3.97868	3.71702	3.52114	3.62843	4.0943	3.81301	3.65458
Olfr1214	3.33177	3.06651	3.29399	3.34208	3.48342	3.19493	3.23391	3.5161	3.09958	3.46238	3.23823	4.17852	3.26191	3.31959	3.59226	3.69885	3.26752	3.45557	3.40057	3.94568	3.79832	4.01503	3.34566	3.33012	3.3048	3.54174	3.40289	3.49883	3.45431	3.33375	3.306	3.37661	3.2814	4.55607	3.39146	3.15221	3.57842	3.5861	3.14636	3.4937
Olfr1215	4.00711	3.78537	3.79454	3.85328	3.51843	3.76598	3.65905	3.6318	3.53922	3.65746	3.51556	3.94642	3.82548	3.55018	3.99699	3.72825	3.76598	4.15389	4.21951	4.5429	4.02172	4.17343	3.56128	3.31659	3.43844	3.83744	3.95301	3.63255	3.91451	3.77745	3.48987	3.74251	3.52041	3.97136	4.50764	3.7727	4.28109	4.24748	3.61684	3.61722
Olfr1216	3.47331	3.35794	3.36106	3.43084	3.31427	3.44092	3.45825	3.32144	3.43084	3.36931	3.59289	3.39143	3.14322	3.63598	3.79239	3.83413	3.44419	3.67689	3.5008	3.46191	3.07359	3.2626	3.27874	3.40349	3.60207	3.43084	3.44404	3.55041	4.00661	3.69698	3.31548	3.38936	3.37709	3.92995	3.60364	3.3398	3.31264	3.43084	3.24058	3.21283
Olfr1217	3.09467	3.12089	3.13594	2.83124	3.27314	3.35443	4.3951	5.04738	5.35129	4.76995	3.81812	5.86095	3.43262	3.81372	3.43721	3.6018	3.69962	3.48508	2.89715	3.51649	3.51721	3.61847	3.04328	3.00169	3.08792	3.38912	3.1834	3.06698	3.39214	3.11703	3.08175	3.08402	3.09773	3.61531	3.43313	3.00133	3.31663	3.42075	3.28403	3.24323
Olfr1218	3.53433	3.749	3.49724	3.55352	3.43166	3.3177	3.61447	3.46413	3.34086	3.55182	3.59477	3.53725	3.73847	3.70654	3.46563	3.54136	3.53361	3.81641	3.47798	4.19721	3.67809	4.06155	3.51916	3.36168	3.39203	3.60762	3.59681	3.61034	3.8697	3.5968	3.39766	3.48643	3.48731	4.31085	3.74855	3.52969	3.58096	3.96201	3.48695	3.65716
Olfr1219	3.94477	3.88909	3.81019	3.88439	3.76969	3.70901	4.26597	3.93027	4.19654	4.1021	4.23064	4.23951	3.77367	3.81148	3.90354	3.90128	4.04778	4.03273	3.89644	4.03925	3.6894	3.74568	3.7121	3.67241	3.58684	3.99788	3.76002	3.58992	4.10157	3.89644	3.82945	3.70705	3.82005	4.12311	3.84284	3.84797	3.80962	4.55753	3.7484	4.08352
Olfr122	4.80494	4.90018	5.06372	4.92939	4.63232	4.64062	5.01693	4.69227	5.34081	5.14394	5.12987	5.36054	5.31595	5.02581	4.8923	5.95799	5.65578	5.44108	4.67494	5.42369	5.3728	5.60114	4.78855	4.84642	4.67278	4.97624	5.0265	4.92861	4.91787	5.34265	4.82199	5.07271	4.90164	5.53677	5.43319	5.34542	5.63252	6.21997	5.0453	5.58214
Olfr1220	3.72983	3.72477	3.74214	3.51747	3.53464	3.58146	3.88743	4.01373	3.67833	3.86668	3.89247	4.39695	3.69086	3.6071	3.48529	3.45738	3.68457	3.59866	3.44957	3.98144	3.64832	4.16361	3.63323	3.53642	3.52209	3.61488	3.48593	3.34188	3.95489	3.59915	3.46294	3.48387	3.2994	3.95683	3.63204	4.10089	3.40957	3.60489	3.86021	3.67833
Olfr1221	2.98799	3.05894	2.89668	3.03693	3.09952	2.94872	3.19358	3.36543	3.03856	3.3566	3.25143	3.64851	3.11629	3.50666	3.27536	3.80816	3.87519	3.19058	3.57879	3.30215	3.32943	3.73265	2.77264	3.03441	2.89982	3.21412	3.24625	2.98623	3.17393	3.19198	2.77606	2.94345	2.75844	3.46249	3.18452	3.07178	2.98544	2.95404	3.06514	3.08725
Olfr1222	5.63207	5.40089	5.46469	5.72321	5.22116	4.8225	5.12241	5.34878	4.921	5.52852	5.43785	4.8233	5.00691	4.7266	4.75083	5.55133	4.55097	5.56364	4.30466	5.62883	5.40521	5.37919	4.45026	4.78716	4.97764	5.39567	4.81233	4.61442	4.87386	5.82039	4.98896	5.09704	4.74257	4.58898	5.12908	4.93974	5.41495	6.04435	5.46537	5.2734
Olfr1223	3.77777	3.98354	3.6838	3.79985	3.7999	3.64826	3.76529	4.22978	3.75706	3.83853	3.9742	3.88035	3.48835	4.0757	3.99876	3.80672	4.18999	4.30807	3.47046	3.9521	3.86902	4.02441	3.64721	3.64863	3.5012	3.89439	3.86635	3.83764	3.58396	3.65007	3.77765	3.70061	3.7249	4.33649	3.88741	3.80728	4.13163	4.20304	3.68061	3.47824
Olfr1225	4.13064	4.30622	4.21812	4.11214	4.20533	4.03636	4.20886	4.22391	4.28626	4.20206	4.38686	4.25348	4.10107	4.34171	4.13445	4.19489	4.17916	4.44473	4.1321	4.27415	4.36129	4.44411	3.92301	4.00858	3.96545	4.42795	4.19489	4.21417	4.21975	4.34526	4.1596	4.13479	4.19079	5.08284	4.28724	4.31467	4.37212	4.20558	4.0157	4.07133
Olfr1226	4.82729	4.52034	4.90142	4.53901	4.45485	4.07082	4.91042	4.98711	5.07422	5.12432	5.06169	5.19337	4.46914	4.46897	4.44529	4.54313	4.38553	4.32067	4.33038	4.60627	4.52096	4.4057	4.09113	4.14255	4.35764	5.18898	4.24891	4.34101	4.80503	4.58678	4.33813	4.36482	4.38101	4.80732	4.50344	4.54783	4.17419	4.55642	4.62153	4.5905
Olfr1228	3.43011	3.42013	3.26613	3.40537	3.51031	3.28556	3.25745	3.40537	4.23719	3.56746	3.5529	4.11238	3.36285	3.17257	3.56539	3.62728	3.48099	3.88089	3.58391	3.52554	3.3154	3.55855	3.28612	3.11649	2.99888	3.37626	3.24566	3.31561	3.43169	3.40537	3.43149	3.27755	3.27975	3.70888	3.35535	3.39788	3.24283	3.52753	3.57142	3.20643
Olfr1229	5.98992	5.8536	5.94223	5.63141	5.75941	5.59931	5.97109	6.01746	5.68712	5.88989	5.82224	5.99304	6.02966	6.00177	6.03381	6.00834	5.85254	6.36549	5.91204	6.0385	5.8565	6.07018	5.69194	5.71465	5.73897	5.88225	5.68721	5.76969	5.82638	5.83309	5.57865	5.64439	5.62063	6.14176	6.33683	5.8121	6.15733	6.51547	5.85921	6.34097
Olfr123	4.76242	5.05412	4.98531	4.90343	4.94436	4.63378	4.93615	5.27736	5.05652	5.0189	5.13612	4.82705	4.82415	4.79829	4.67828	5.009	5.07876	5.25971	4.87883	5.20259	4.77532	5.37725	4.90695	4.61874	4.57126	4.9882	4.94964	5.22088	4.70905	5.43864	4.91616	5.16465	4.8776	5.46326	4.69875	5.53013	5.5199	4.96819	5.17493	5.04619
Olfr1230	4.65149	4.70234	4.75921	4.55222	4.49423	4.39611	4.22773	4.32939	4.39212	4.33096	4.36634	4.61113	4.58963	4.70338	4.85782	4.88641	4.46091	5.06746	4.71944	4.95429	4.17591	4.77878	4.4184	4.34768	4.34101	4.98544	4.57437	4.54315	4.2706	4.54454	4.55175	4.76982	4.59459	4.54333	4.72709	5.0342	4.64471	4.4886	4.64069	4.30526
Olfr1231	4.21489	4.18041	4.5361	4.54706	4.33443	4.30362	4.35075	4.12567	4.83399	4.1614	4.41394	4.6711	4.19339	4.32296	4.1254	4.07324	4.50054	4.08344	4.06219	4.54083	3.89048	3.97759	4.07793	3.96601	3.96284	4.25187	4.46969	4.28465	4.49643	3.9663	4.24042	4.05719	4.15023	4.25887	4.60077	4.15509	4.50982	4.65144	4.62387	4.32608
Olfr1232	3.29394	3.20899	3.25458	3.4052	3.1449	3.44712	3.36253	3.39709	3.4562	3.02505	3.45132	3.49131	3.37115	3.65816	3.82611	3.84836	3.46068	3.64767	3.44024	3.75901	3.47765	3.4	3.24118	3.26996	3.30075	3.40665	3.39709	3.18934	3.80313	3.51363	3.12934	3.18209	3.21555	3.97136	3.8543	3.28056	3.39206	3.3782	3.11342	3.32386
Olfr1233	4.59696	4.60783	4.55877	4.54352	4.32562	4.44911	4.40975	4.89306	5.01663	4.58143	4.203	5.43941	4.44923	4.18646	4.33628	4.20659	4.1135	4.28382	4.17362	4.11304	4.42891	3.98577	4.2109	4.14952	4.2074	4.28243	4.19214	4.41088	4.11576	4.33511	4.09734	4.29783	4.3557	4.22755	4.08948	4.6141	4.61797	4.42057	4.19986	4.08565
Olfr1234	4.09688	4.15558	3.88679	3.79811	3.99542	3.82593	4.00533	4.00498	3.99913	3.45844	3.88405	4.66095	3.84692	3.97462	3.76413	3.85552	3.86322	4.2919	4.06592	4.33024	4.12134	4.39545	3.8586	3.7505	3.85717	4.06387	3.51175	3.90909	3.92571	3.83821	3.84773	3.7592	3.92241	3.9844	4.53064	3.96837	4.45481	4.2292	3.81297	4.05997
Olfr1238	4.55395	4.35301	4.24789	4.45184	4.27944	4.15232	4.64381	4.77598	5.06809	4.65228	4.8899	5.80374	4.5552	4.51405	5.01771	4.50493	4.61689	4.05223	4.33005	4.8742	4.69754	4.9653	4.25956	4.20982	4.24925	4.51682	4.02082	4.01185	3.99031	4.21747	3.9885	4.31325	4.35988	4.40138	4.65967	4.15009	4.60285	4.71008	4.3729	4.86017
Olfr1239	4.80019	4.9532	4.79075	4.58537	4.54194	4.53631	4.54333	4.82122	4.90163	4.78337	4.52098	5.34211	4.62497	4.46874	4.37215	4.95922	4.62307	4.39533	4.65868	4.67012	4.22396	5.35294	4.57554	4.18694	4.50471	4.57554	4.66393	4.92181	4.34427	5.01518	4.52924	4.56533	4.42136	5.09046	4.46862	5.24082	4.89709	4.98671	4.82768	4.83656
Olfr124	4.21095	4.27307	4.26702	4.09747	4.07472	4.14076	4.32819	4.07722	4.09054	4.06171	4.16953	4.20292	4.34893	4.3683	4.5301	4.52748	4.82009	4.43399	4.50638	4.60291	4.72323	4.50966	4.21709	4.17447	4.15281	4.50754	4.28924	4.49813	4.59624	4.61779	4.41951	4.77202	4.33495	5.30721	4.25014	4.3826	4.53828	4.69755	4.57546	4.81098
Olfr1240	4.05948	3.89451	3.94923	3.69016	4.01792	4.23674	3.82286	3.76077	4.13071	3.76964	3.6667	4.19802	3.65521	3.83101	3.5196	3.91134	3.9031	4.02949	4.00272	4.37085	3.9031	4.23917	3.6442	3.84466	4.03805	3.7893	3.74313	3.64777	3.96584	4.08345	3.86122	3.77934	3.77095	4.32924	4.29766	4.01805	4.06135	3.9998	3.69745	3.94952
Olfr1241	3.72595	3.87732	3.83623	3.7647	3.72178	3.6976	3.98278	3.94146	3.88499	4.04401	4.04303	4.78208	3.64612	3.6493	4.07465	3.58901	3.93059	3.73755	3.89321	4.0674	4.24931	4.27447	3.69734	3.86006	3.74306	4.05863	3.9801	4.01603	3.93059	3.79745	3.842	3.74729	3.65262	4.15782	4.18144	4.04439	4.04892	4.04024	3.83167	4.15262
Olfr1242	4.39321	4.96321	4.49466	4.47002	4.38734	4.38374	4.21706	4.20278	4.92475	4.62501	4.45632	5.08036	4.07861	4.26124	4.0171	4.14878	4.38376	4.59611	4.48284	4.71781	4.25266	4.44111	4.14777	3.95403	4.06606	4.3098	3.91915	4.0685	4.42537	4.25985	4.22792	4.52984	4.05244	4.65305	4.23608	4.36767	4.30113	4.12813	4.13811	4.19951
Olfr1243	3.62602	3.62602	3.68143	3.67775	3.81588	3.59329	3.98578	4.01496	3.69042	3.86801	3.75504	4.0431	3.64497	3.48284	3.53164	3.99555	3.7706	3.4404	3.66007	3.68066	3.62602	3.61121	3.60124	3.50915	3.57072	3.59812	3.67769	3.48944	3.49035	3.7813	3.6454	3.63407	3.4776	3.97972	3.57934	3.68583	3.57583	3.4969	3.49303	3.50034
Olfr1245	3.49459	3.55928	3.81584	3.48467	3.40407	3.13914	3.379	3.19858	3.31687	3.47362	3.4124	3.70599	3.0611	3.58533	3.34663	3.69226	3.54088	3.66417	3.26519	3.47915	3.39026	3.81236	2.99897	3.29466	3.09869	3.19447	3.57415	3.36428	3.2785	3.75487	3.46641	3.73027	3.33305	4.76838	4.01038	3.35442	4.11996	3.31491	3.33372	3.97722
Olfr1246	3.15443	3.15139	2.98461	3.01558	3.0731	3.03427	3.11463	3.14438	3.85836	3.32104	3.14485	3.13686	2.99009	3.18616	3.24689	3.60109	3.47347	3.90663	3.72253	3.1332	3.13574	3.67581	2.79593	2.90973	2.96315	3.36045	3.22642	2.90769	3.15443	3.02135	3.2423	2.94663	2.95501	3.29115	3.36177	3.0505	3.27073	3.34985	3.02945	3.23572
Olfr1247	3.45323	3.46776	3.36828	3.32049	3.36775	3.33344	3.55324	3.35658	3.31289	3.53569	3.55615	3.83802	3.76942	3.6677	3.59906	3.75759	3.63617	3.52904	3.43039	3.75631	3.62602	3.9657	3.38828	3.54755	3.34824	3.7353	3.47545	3.45601	3.82488	3.5143	3.56341	3.45624	3.44223	4.11031	4.1371	3.28835	3.95881	3.90678	3.46929	3.55979
Olfr1248	3.01784	3.3444	3.34743	2.88634	2.84582	3.31123	2.97488	2.81691	3.51712	2.86807	2.99853	3.69641	3.02446	2.88631	3.60952	3.42604	3.33805	3.28345	3.71705	3.99247	3.71034	3.58512	2.62786	2.63715	2.78916	2.82987	3.31513	2.83366	2.89011	2.69477	3.13017	3.08074	2.92896	3.34567	3.0593	3.04008	2.97923	2.99252	2.75961	2.73331
Olfr1249	4.32019	4.5075	4.21418	4.30373	4.13296	4.30029	4.07933	4.21832	4.30062	4.30213	4.77227	5.14268	4.64973	4.65928	4.40746	4.89278	4.64026	5.15592	4.09681	4.16442	4.59789	5.21339	3.85398	3.87958	3.78532	3.97851	3.90477	4.37776	4.36762	4.19665	3.71296	4.31631	4.19919	4.87435	4.2093	4.08177	4.05731	4.24086	4.57307	4.4946
Olfr125	3.67301	3.28277	3.47381	3.38362	3.34319	3.21378	3.32529	3.03007	3.2988	3.32828	3.09917	3.1279	3.44202	3.30643	3.64985	3.45004	3.5847	3.51937	3.42718	3.78523	3.42866	4.44119	3.24266	3.16928	3.39043	3.42507	3.47723	3.27166	3.5121	3.18347	3.48861	3.56651	3.33003	3.92164	3.50061	3.35607	3.49134	3.40235	3.42346	3.5581
Olfr1250	3.97688	3.54288	3.52848	3.46119	3.53581	3.39941	3.07367	3.21898	3.1027	3.24201	3.15015	3.15829	3.33172	3.18891	3.55262	3.42483	3.24124	3.24702	3.35455	3.66519	3.21668	3.7445	3.13654	3.13901	3.06933	3.40248	3.25303	3.59423	3.43453	3.27781	3.1883	3.42675	3.16511	3.72513	3.39538	3.33047	3.39623	3.51008	3.39376	3.23189
Olfr1251	2.9308	2.93146	3.15238	3.37459	2.85121	2.94496	2.94506	2.75358	2.6887	2.66965	2.80648	2.65092	2.70884	2.91222	2.78926	3.15916	3.0823	3.25237	2.76532	3.11372	2.61978	2.87748	2.6521	2.7294	2.71123	2.80692	2.8797	2.78926	2.88247	2.98379	2.53598	2.74041	2.68848	3.46877	2.83828	3.41318	2.92262	2.99226	2.69282	2.70583
Olfr1252	4.47059	4.21142	4.40242	3.84234	3.95778	3.97519	5.20416	5.1143	5.64895	5.1176	3.83378	5.92161	3.7868	3.81764	3.87928	4.41072	4.42933	4.71366	4.28041	4.30167	3.57941	4.18644	4.09045	3.75727	3.93705	4.461	3.99487	3.94194	4.16041	4.27788	3.98246	4.02476	3.81066	4.33935	4.02653	4.05744	4.4381	4.45693	4.40716	4.10717
Olfr1253	3.52509	3.27165	3.12929	3.32682	3.21178	2.93967	2.9035	2.99014	3.14692	3.01297	2.61472	3.45842	3.0392	3.48283	3.28746	3.46721	3.19086	4.20172	3.39781	3.43502	2.93751	4.31275	3.13985	3.18072	3.12607	3.48684	3.5823	3.09652	3.45804	3.37828	2.93179	2.98921	2.94593	3.58879	3.92291	3.33207	3.22815	3.74854	3.12319	3.12835
Olfr1254	2.86532	3.0598	3.02648	2.78444	2.80052	2.95112	3.22125	3.0388	3.03006	2.98538	3.04965	2.9848	3.01493	3.24371	3.0982	3.08975	3.31788	3.14361	3.38653	3.25345	3.32231	4.27495	2.89295	2.94181	2.82035	3.1625	2.80394	2.97472	3.0364	2.99002	2.95157	2.97751	2.96127	3.38343	3.5944	2.96957	3.14677	3.09976	2.95971	3.06992
Olfr1255	4.08689	4.1767	4.07058	4.1062	3.94781	4.06556	4.52671	4.84763	4.26386	4.35117	4.6579	4.406	4.03749	4.37486	4.20209	4.40345	4.29105	4.10035	4.53226	4.62035	4.20123	4.41576	4.18534	3.81555	3.99645	4.19363	4.10541	4.09413	4.29952	4.49383	4.28062	4.15299	4.19001	4.68816	4.58171	4.17208	4.47247	4.59054	4.06546	4.18325
Olfr1256	4.72106	4.74803	4.51293	4.48628	4.50649	4.26292	4.09207	4.44855	4.48393	4.17463	4.24134	3.96679	4.26252	4.32881	4.46043	4.21077	4.5688	4.66872	4.41555	4.89942	4.10167	4.67867	4.42599	4.08371	4.03891	4.53242	4.37953	4.29368	4.65556	4.40523	4.21686	4.56812	4.20887	4.37203	4.49881	4.59117	4.37864	4.44506	4.72072	4.25899
Olfr1257	3.24155	3.38568	3.38905	3.41688	3.34042	3.26239	3.69546	3.42936	3.81615	3.49262	3.42368	3.81371	3.40482	3.35491	3.80234	3.7118	4.25964	3.71368	3.25777	3.66749	3.2351	3.46721	3.29639	3.40797	3.27804	3.25534	3.32553	3.35549	3.75785	3.45795	3.45682	3.47343	3.07689	4.15942	3.4167	3.16576	3.87843	3.8024	3.84114	3.60883
Olfr1258	4.44851	4.39429	4.40531	4.35499	4.24761	4.56011	4.71725	4.36201	4.31318	4.55598	4.39999	5.73881	4.4519	4.23069	4.3217	4.718	4.83417	4.36222	4.22349	4.11663	4.40396	4.39545	4.28626	4.28109	4.40442	4.62598	4.25165	4.21385	4.31146	4.57818	4.43043	4.21256	4.42178	4.71687	4.52283	4.50894	4.55611	4.72889	4.31732	4.45507
Olfr1259	4.25609	4.11859	4.42334	4.23218	4.28872	4.01456	4.90333	4.56946	4.92443	4.5572	4.81725	5.38901	4.50301	4.23659	4.52184	4.09053	4.38977	4.43705	4.50558	4.66023	4.37346	4.58823	4.11711	4.34352	4.25625	4.24382	4.28132	4.18857	4.40995	4.17654	4.33944	4.43916	4.25609	4.38149	4.33004	4.50177	4.45768	4.59125	4.2388	4.15562
Olfr126	4.13355	3.88789	3.91308	4.169	3.92951	3.85177	3.92273	4.24546	3.95457	4.25175	4.13335	4.88219	4.35065	4.31838	3.98943	4.41477	4.05936	4.3071	4.33568	4.29678	3.94498	4.23202	3.7907	3.79614	3.83874	3.86292	3.77863	3.6394	4.22567	3.72456	3.88076	3.60825	3.61218	3.852	4.39076	3.73647	3.84525	4.28904	3.78994	3.7646
Olfr1260	5.03518	4.98766	4.99139	4.96661	4.82049	4.97421	5.67877	5.44929	5.70163	5.59938	5.44955	6.2926	5.02151	5.17914	4.90631	4.81182	5.4018	4.884	5.22069	5.51138	4.88329	5.10735	4.72901	4.82199	4.53955	4.95716	4.909	4.77512	5.48079	4.83163	4.74812	5.06503	4.76542	4.65715	4.93851	5.14279	5.12602	4.87259	5.10523	4.77849
Olfr1261	3.26903	3.26671	3.35875	3.16725	3.24587	3.23466	3.57629	4.07527	3.83551	3.94557	3.36813	3.72996	3.64867	3.36775	3.58333	3.48826	3.4798	3.95418	3.50315	3.46485	3.05494	3.32757	3.21403	3.24985	3.17735	3.50202	3.07836	3.25914	3.74295	3.4023	3.33249	3.26227	3.03441	3.97992	3.95992	3.4462	3.35734	3.5075	3.06326	3.53859
Olfr1262	4.40535	4.70476	4.51627	4.41998	4.53193	4.62057	4.86502	5.2617	5.86715	5.06393	4.65695	5.07366	4.47894	4.57554	4.66019	4.05105	4.25964	4.36205	4.23045	4.68993	4.16572	4.63187	4.65758	4.52734	4.23289	4.7745	4.52488	4.77915	5.30336	4.52935	4.65382	4.41792	4.54871	4.9043	5.67335	4.57898	5.02466	5.15069	4.33679	5.19139
Olfr1263	4.4967	4.26085	4.34239	4.17707	4.27788	4.48291	4.16049	4.22393	4.6591	4.45629	4.56451	4.57088	4.25417	4.41189	3.82068	4.07486	4.76778	4.18217	4.31717	4.35198	4.37808	4.84677	3.97274	4.05053	4.0865	4.16593	4.21331	4.34789	4.73209	4.26228	4.06664	4.1476	3.98363	3.89018	4.13926	4.19035	4.25142	4.38066	4.31753	4.26432
Olfr1264	4.6764	4.53796	4.31719	4.3671	4.35552	4.23997	4.49659	4.43528	4.72652	4.72576	4.65951	5.54656	4.21021	4.23064	4.55268	4.69593	4.67109	4.6381	4.39277	4.49931	4.21843	4.69931	4.28024	4.1969	4.109	4.51108	4.18782	4.34552	4.38478	4.53177	4.06436	4.21762	4.20294	4.29574	4.44058	4.64827	4.33242	4.48425	4.50211	4.48168
Olfr1265	3.92984	4.08292	3.86323	4.01146	3.92715	3.99808	3.75149	4.04261	3.8668	3.99565	3.78365	3.72249	4.07848	3.75264	3.97669	4.18042	3.79035	3.8516	4.33887	4.22455	3.91498	4.70323	3.71277	3.81393	3.68946	4.1815	3.79968	3.84237	4.34664	3.87201	3.48733	3.82234	3.66318	3.75423	4.00499	3.86147	3.93006	4.43169	4.21034	3.94067
Olfr1269	3.92984	4.08292	3.86323	4.01146	3.92715	3.99808	3.75149	4.04261	3.8668	3.99565	3.78365	3.72249	4.07848	3.75264	3.97669	4.18042	3.79035	3.8516	4.33887	4.22455	3.91498	4.70323	3.71277	3.81393	3.68946	4.1815	3.79968	3.84237	4.34664	3.87201	3.48733	3.82234	3.66318	3.75423	4.00499	3.86147	3.93006	4.43169	4.21034	3.94067
Olfr127	4.13355	3.88789	3.91308	4.169	3.92951	3.85177	3.92273	4.24546	3.95457	4.25175	4.13335	4.88219	4.35065	4.31838	3.98943	4.41477	4.05936	4.3071	4.33568	4.29678	3.94498	4.23202	3.7907	3.79614	3.83874	3.86292	3.77863	3.6394	4.22567	3.72456	3.88076	3.60825	3.61218	3.852	4.39076	3.73647	3.84525	4.28904	3.78994	3.7646
Olfr1270	4.12223	3.55457	3.99505	3.99093	3.91732	3.96323	3.76069	3.78133	4.39427	4.00227	3.88513	4.70812	3.73087	3.63251	3.87758	3.88023	3.58849	4.00689	3.72837	3.83645	3.90541	3.92343	3.63658	3.64713	3.84665	4.10798	3.75168	3.51517	4.1069	4.19368	3.67202	3.87918	3.66133	4.75142	3.96456	3.69691	4.2729	4.00479	4.0416	4.00615
Olfr1271	4.462	4.27864	3.97123	4.09594	3.87453	3.86929	3.60992	3.75451	4.25044	3.79008	4.27087	3.65289	4.00704	3.98874	4.36667	4.13344	4.36426	4.40157	4.23811	4.79646	4.2652	5.15968	3.80243	3.75819	3.78866	4.13254	4.00516	3.86599	4.14134	3.86313	3.73061	3.96313	3.78426	3.99678	4.83502	3.90465	4.06213	3.78632	3.82497	3.7725
Olfr1272	5.33788	5.24706	5.26948	5.12507	5.16077	5.08531	5.70726	5.82775	5.88755	5.36535	5.45902	6.24102	5.05379	4.86376	4.8388	4.95126	4.83722	4.60049	5.09231	5.42174	5.23287	5.25771	5.27523	5.19216	5.22373	5.71303	5.15943	5.25933	5.20607	5.39889	5.27116	5.19222	4.97031	5.72924	5.28982	5.4233	5.37863	5.8241	5.56909	5.54909
Olfr1273-ps	3.23435	3.30765	3.3367	3.16493	3.40068	3.67357	3.06324	3.91206	3.95445	3.45337	3.77503	4.62853	3.3345	3.32132	3.10621	3.32602	3.54342	3.82368	3.29308	4.27847	3.58124	3.72756	2.90342	3.06681	2.904	3.31238	3.06051	2.88504	3.11387	3.16313	3.14163	3.17295	3.06402	3.77849	3.55714	3.1198	3.12943	3.34029	3.13211	3.21157
Olfr1274-ps	4.73448	4.64812	5.35105	4.63429	4.5679	4.84429	6.31501	4.58588	4.42668	4.46324	4.01858	4.88809	4.89838	4.5021	4.46149	4.96133	4.78168	4.39562	4.97933	4.86466	4.3056	4.25703	4.49094	4.09537	4.31766	4.9225	4.21534	4.42809	4.75923	4.53207	4.67203	4.73065	4.91923	4.62646	4.66145	4.36265	4.02223	4.29166	4.59473	4.07735
Olfr1275	3.79905	3.82631	3.98498	3.89014	3.87903	3.51838	3.4804	3.80879	3.97248	3.84108	3.77396	4.4685	3.44079	3.83554	4.7205	4.04324	3.65315	3.88395	4.17984	4.43214	3.79498	4.13286	3.8263	3.73904	3.76337	3.94191	3.63126	3.97688	3.97963	3.70386	3.92038	3.68258	3.52123	3.79982	4.13872	4.20817	3.76134	3.89806	4.29252	4.11882
Olfr1276	5.14488	4.72375	4.64847	4.54375	4.41573	4.51433	4.64151	4.75518	5.10124	4.6261	4.18792	4.9094	4.71697	4.85085	4.89368	4.91704	4.58171	4.9926	4.6261	4.78711	4.4887	4.85398	4.27508	4.62845	4.49342	4.77101	4.52006	4.20489	4.68184	4.76265	4.38937	4.25711	4.19783	4.7798	4.84834	4.71445	4.64176	4.39197	4.72399	4.50274
Olfr1277	5.20553	5.19311	5.38351	5.11083	4.94572	4.83653	5.14582	4.94507	5.24292	5.0357	5.0402	5.26668	4.79292	4.8977	4.93803	4.80366	5.00528	4.63614	4.9218	5.2419	5.01775	5.77793	4.94003	4.75907	4.74547	5.00712	4.70491	4.84295	4.70344	4.85643	4.78392	4.74346	4.79894	4.83533	4.65208	5.47825	5.41651	5.07496	5.06014	4.80011
Olfr1278	4.14188	4.02887	4.17039	4.11312	4.00342	3.97014	4.03379	3.58562	3.7411	3.9595	4.32441	4.4834	4.15202	4.3529	4.0439	4.00699	3.93163	4.32056	4.10948	4.16811	4.01828	4.37686	3.98276	3.88643	3.93349	3.85442	4.0439	3.81243	3.95608	4.17379	3.77708	3.87424	3.82903	3.64488	4.17764	3.84949	4.25578	3.98656	4.22452	3.57301
Olfr1279	5.13447	5.24144	5.17962	5.29361	5.11739	4.94644	5.47283	5.47816	5.66022	5.35304	5.17403	5.68914	5.04891	5.20816	5.41776	5.29297	5.08383	5.34336	5.18013	5.57082	5.31445	5.37795	5.1267	4.94333	4.92609	5.38096	5.07482	5.24017	5.61841	5.26725	5.08384	4.93991	4.98696	5.20738	5.48207	5.30277	5.39076	5.50105	5.1455	5.22366
Olfr128	4.13355	3.88789	3.91308	4.169	3.92951	3.85177	3.92273	4.24546	3.95457	4.25175	4.13335	4.88219	4.35065	4.31838	3.98943	4.41477	4.05936	4.3071	4.33568	4.29678	3.94498	4.23202	3.7907	3.79614	3.83874	3.86292	3.77863	3.6394	4.22567	3.72456	3.88076	3.60825	3.61218	3.852	4.39076	3.73647	3.84525	4.28904	3.78994	3.7646
Olfr1280	4.42638	4.51291	4.34139	4.39	4.24181	4.34355	3.52133	3.82197	3.26861	4.01682	3.43408	3.59222	3.37786	3.9682	3.84512	3.85552	3.72182	4.22021	3.5854	4.0444	3.7665	4.13204	3.54238	3.68013	3.6045	3.56457	3.64949	3.53819	3.68844	3.60331	3.32416	3.7254	3.53	3.57105	4.13194	3.60207	3.79555	3.72123	3.5592	3.6358
Olfr1281	3.22773	3.17369	3.43777	3.37617	3.20815	3.29646	3.93515	3.90414	3.94188	3.88103	3.60599	4.58348	3.98827	3.18637	3.69647	4.08473	3.90738	3.40618	3.62669	3.59761	3.68558	4.11783	3.11416	3.23496	3.38535	3.23867	3.11623	3.07725	3.52848	3.17823	3.3886	3.14985	3.22462	3.67631	4.02862	3.34206	3.62694	3.27808	3.35386	3.21474
Olfr1282	4.42638	4.51291	4.34139	4.39	4.24181	4.34355	3.52133	3.82197	3.26861	4.01682	3.43408	3.59222	3.37786	3.9682	3.84512	3.85552	3.72182	4.22021	3.5854	4.0444	3.7665	4.13204	3.54238	3.68013	3.6045	3.56457	3.64949	3.53819	3.68844	3.60331	3.32416	3.7254	3.53	3.57105	4.13194	3.60207	3.79555	3.72123	3.5592	3.6358
Olfr1283	4.42638	4.51291	4.34139	4.39	4.24181	4.34355	3.52133	3.82197	3.26861	4.01682	3.43408	3.59222	3.37786	3.9682	3.84512	3.85552	3.72182	4.22021	3.5854	4.0444	3.7665	4.13204	3.54238	3.68013	3.6045	3.56457	3.64949	3.53819	3.68844	3.60331	3.32416	3.7254	3.53	3.57105	4.13194	3.60207	3.79555	3.72123	3.5592	3.6358
Olfr1284	5.09728	5.05285	5.27105	5.2234	5.14081	5.08067	5.29683	5.75259	5.65973	5.6916	5.5773	6.03377	5.35899	5.53718	5.34133	5.57137	5.4103	5.89183	5.58989	5.47944	5.25535	6.0228	5.25245	4.91166	5.1509	5.53452	5.17187	5.24109	5.43313	5.44199	5.62873	5.07251	5.33376	5.51516	5.14501	5.4982	5.13195	5.40519	5.16434	5.29211
Olfr1286	4.42638	4.51291	4.34139	4.39	4.24181	4.34355	3.52133	3.82197	3.26861	4.01682	3.43408	3.59222	3.37786	3.9682	3.84512	3.85552	3.72182	4.22021	3.5854	4.0444	3.7665	4.13204	3.54238	3.68013	3.6045	3.56457	3.64949	3.53819	3.68844	3.60331	3.32416	3.7254	3.53	3.57105	4.13194	3.60207	3.79555	3.72123	3.5592	3.6358
Olfr1287	4.42638	4.51291	4.34139	4.39	4.24181	4.34355	3.52133	3.82197	3.26861	4.01682	3.43408	3.59222	3.37786	3.9682	3.84512	3.85552	3.72182	4.22021	3.5854	4.0444	3.7665	4.13204	3.54238	3.68013	3.6045	3.56457	3.64949	3.53819	3.68844	3.60331	3.32416	3.7254	3.53	3.57105	4.13194	3.60207	3.79555	3.72123	3.5592	3.6358
Olfr1288	3.65308	3.60731	3.53912	3.5003	3.53245	3.46338	3.59461	3.41103	3.52294	3.87919	3.37934	3.94597	3.49375	3.61675	3.40717	3.83138	3.5003	3.64544	3.39092	3.65162	3.54805	3.65483	3.35404	3.18284	3.47858	3.5003	3.15302	3.4895	3.47437	3.25749	3.35903	3.70921	3.17888	3.97755	4.43097	3.25369	3.44105	3.67097	3.184	3.74177
Olfr1289	3.62226	3.5037	3.42486	3.45786	3.51302	3.43029	3.98725	3.9346	3.66359	4.00253	3.55976	4.70454	3.49166	3.84787	3.63159	3.83626	3.87022	3.7827	3.71843	4.35736	3.60958	4.08485	3.35828	3.37116	3.39835	3.6558	3.64214	3.39601	3.59228	3.68782	3.4807	3.49836	3.35651	4.10722	3.77309	3.42828	3.6324	3.62698	3.3016	3.52385
Olfr129	5.41173	5.30766	5.24848	5.2163	5.25127	5.15033	5.53388	5.47885	5.49682	5.33296	5.13948	5.57311	5.27051	5.28944	5.10273	5.10929	5.22319	5.61492	5.14787	5.26688	5.03206	5.27645	4.88128	4.82746	4.99916	5.31266	5.18352	5.15006	5.21516	5.49689	5.33348	5.24055	5.21848	4.97488	5.67867	5.19599	4.99447	5.37312	5.27447	5.50105
Olfr1290	3.40301	3.53351	3.4632	3.19849	3.61018	3.52101	3.53744	3.77324	3.58534	3.41177	3.79709	3.67327	3.8037	3.76797	4.82627	4.27154	3.46961	3.9286	4.2616	4.2577	4.20466	4.0591	3.3549	3.41447	3.50895	4.13193	3.50979	3.89837	3.74067	4.12322	3.81875	3.35883	3.46024	4.04407	4.01022	3.54646	3.425	4.16093	3.71324	3.94462
Olfr1294	4.17092	4.1533	4.04686	3.97609	4.03506	3.88474	3.95389	3.62841	3.98962	4.12733	3.8924	4.26251	3.86107	3.78933	3.92731	4.09104	4.0221	4.19881	4.1134	4.06665	4.19104	3.97715	3.79342	3.88354	3.72727	4.19322	4.06168	3.84011	4.02708	3.97063	3.59569	3.96582	3.85118	3.8809	4.002	3.98962	3.98962	3.98962	3.98892	3.87212
Olfr1295	4.19805	4.18233	4.40902	3.95754	4.06899	3.78583	4.06559	4.22416	4.10803	4.00546	3.83591	4.37746	3.864	3.81497	3.61396	4.3117	4.4249	4.32103	3.75903	4.2638	4.07669	4.37793	3.67003	3.78693	3.57138	3.857	3.78621	3.79197	3.9758	3.99646	3.90138	3.90976	3.72999	3.68723	3.88204	4.2087	4.03002	4.17487	3.84892	3.77824
Olfr1297	3.41366	4.0727	3.66424	3.84007	3.43996	3.42591	3.26373	4.01504	3.28274	3.06099	3.34925	3.4021	3.48636	4.14556	3.65165	4.49103	3.70499	5.03074	3.936	4.45443	3.43431	3.90431	3.36072	3.2867	3.34168	3.84808	3.62102	3.28233	3.50516	3.79407	3.5601	3.36235	3.34848	3.98174	3.52481	3.76989	3.48897	3.60799	4.0274	3.55029
Olfr1298	3.4057	3.64163	3.52683	3.40166	3.50416	3.32996	3.98057	4.13398	4.04248	5.4109	3.86614	6.31059	3.55718	3.4721	3.62323	3.9486	3.60996	3.66666	3.9276	4.21796	3.69333	3.86545	3.47212	3.47031	3.39059	3.36866	3.52419	3.57359	3.99065	3.93058	3.94824	3.54624	3.4116	3.32167	3.76275	3.65286	4.02607	3.59852	3.67089	3.48536
Olfr1299	3.82403	3.77556	3.92901	3.81539	3.98054	3.53399	4.07013	4.13475	4.384	4.09775	4.15344	4.91947	3.83395	3.59487	3.78112	3.85465	3.87148	3.94072	3.70926	4.06525	4.07345	4.05401	3.56791	3.55681	3.6287	4.17085	3.8894	3.76109	3.66808	4.00766	3.69276	3.55797	3.37189	4.35167	4.02501	3.79362	4.13874	3.8618	3.9009	3.62894
Olfr13	5.58385	5.51391	5.58648	5.60884	5.3832	5.18345	5.65648	5.72694	5.56938	5.78644	5.56686	5.50205	5.17355	5.3552	5.48898	5.45452	5.34252	5.72884	5.51228	5.45339	5.83783	5.43928	5.34136	5.12682	5.19344	5.80907	5.49761	5.45339	5.88034	5.29155	5.11673	5.20437	5.1895	5.45339	5.18899	5.2584	5.45339	5.67564	5.53716	5.5442
Olfr130	3.90534	3.79954	3.82243	3.83149	3.78128	3.83427	3.92957	3.77746	3.99986	4.0788	4.00606	4.09878	3.97056	3.84692	3.66332	4.23177	4.34527	4.13017	4.03376	3.81376	3.86963	4.22312	3.78744	3.86166	3.8021	3.9755	3.69348	3.97124	3.76537	4.21418	3.83209	4.15176	3.95026	4.01526	4.60139	3.79839	3.957	4.37101	3.96455	4.00826
Olfr1300-ps1	3.58913	3.60571	3.45909	3.23147	3.28881	3.37109	3.71571	3.26875	3.46333	3.57712	3.4164	3.97272	3.52326	3.30648	3.52788	3.43806	3.52692	3.66551	3.4626	3.67607	3.83346	3.91387	3.35195	3.39198	3.3906	3.45188	3.3452	3.29463	3.46874	3.52589	3.53665	3.50569	3.36466	3.64638	3.73803	3.29	3.31649	3.76962	3.55063	3.52176
Olfr1301	4.26693	4.19894	4.28062	4.55083	4.42754	4.28365	4.25276	4.32804	4.13651	4.05879	3.97188	4.13095	4.27388	4.14341	4.49183	4.27342	3.78268	4.00622	4.46635	4.14205	4.10024	4.2156	4.28062	4.31094	4.1197	4.60753	4.07185	4.28152	4.34646	4.60204	4.28062	4.22894	4.39669	4.52713	4.11177	4.48445	4.57222	4.13367	4.52131	4.34509
Olfr1302	3.10445	3.27083	3.34879	3.43388	3.50165	3.2806	3.39084	3.69816	3.56763	3.618	3.29635	4.36192	3.38469	3.75931	3.5051	3.22543	3.14826	3.48647	2.98616	3.51695	3.27203	3.71081	3.24723	2.92725	3.25525	3.25751	3.02959	3.24589	3.32896	3.01135	3.3254	3.07572	3.37917	3.6312	3.26495	3.14036	3.28406	3.25531	2.98498	3.20586
Olfr1303	3.5774	3.6766	3.82326	3.8239	3.5248	3.57899	4.16037	4.14385	4.29989	4.39421	3.93462	4.98498	3.68347	3.53815	3.72507	3.69306	3.90965	3.89204	3.85775	3.63322	3.54737	4.08116	3.75116	3.62268	3.67024	4.13885	3.78674	3.64224	3.6916	3.76898	3.67552	3.76105	3.48169	4.21975	3.96859	3.77073	4.30856	4.00438	3.99856	3.766
Olfr1305	4.09598	4.24841	4.01951	4.01805	4.14002	3.99713	3.73979	4.24608	4.15204	3.77645	3.75769	3.92027	3.8401	4.17398	4.0844	4.03749	4.00542	3.7354	3.84168	4.00166	4.29667	4.25671	3.88539	3.87395	3.66349	3.91809	3.76139	3.96414	4.55378	3.85894	3.60395	3.99454	3.7988	4.16596	4.24073	4.18572	3.85325	4.29949	4.1477	4.00542
Olfr1306	3.0985	2.84747	2.97347	3.17497	3.06264	3.00282	2.84545	3.01258	3.04625	2.81018	2.99686	3.49802	3.06598	3.04114	3.20181	3.03178	3.13987	3.28686	3.232	3.38005	3.0448	3.18993	2.88572	2.9248	3.02092	3.03716	2.94413	2.98004	3.21382	2.91257	2.94465	2.91982	2.80208	3.87841	2.90716	2.89921	3.21822	3.39765	3.08027	3.04114
Olfr1307	4.22341	3.92516	4.60066	4.24002	4.38272	4.1513	4.40813	5.14513	4.80312	4.29823	4.2794	5.49233	3.77722	4.02133	4.34377	4.15935	4.03441	4.23811	4.23106	3.98154	4.35315	4.37979	3.7199	3.94627	3.6498	4.4514	4.16284	4.09442	3.85931	4.14232	4.03162	4.1435	3.55168	4.5734	4.2928	4.33099	4.35614	4.62512	3.90243	3.68579
Olfr1308	3.34684	3.15873	3.40443	3.19271	3.0063	3.21173	3.37323	3.54175	3.17479	3.4629	3.18481	4.23085	3.29242	2.80713	3.01594	3.32661	3.38836	3.33178	3.22459	3.24913	3.00662	3.53654	3.06316	2.98915	2.94764	3.08929	3.14293	2.86565	3.47472	3.0414	3.12369	3.12091	2.84528	3.40158	3.40828	2.9343	3.20868	3.25157	3.15949	2.94234
Olfr1309	4.41596	4.70224	4.48953	4.48771	4.30924	4.19581	4.23079	4.26088	4.41863	4.13514	4.33533	4.9064	4.20784	4.75364	4.39347	5.05342	4.59955	4.89943	4.43368	4.26828	4.16401	4.6529	4.14877	4.22739	4.45022	4.55318	4.3977	4.18026	4.58817	4.39618	4.58369	4.56847	4.25448	4.24354	4.15261	4.45724	4.45133	4.61358	4.4014	4.33996
Olfr131	4.23757	4.35983	4.38121	4.08007	4.31937	4.36176	4.23757	4.13161	4.35141	4.23757	4.61997	4.99501	3.87596	4.00541	4.51898	4.63496	4.25964	4.03492	4.00897	4.61565	4.20164	4.30562	4.20493	3.99341	4.23757	4.26437	3.99451	4.13675	4.05694	4.23757	3.92528	4.14757	4.16399	4.30543	4.20647	4.28561	4.32215	4.32494	4.17163	4.31051
Olfr1310	4.24572	3.93384	4.07251	3.98212	3.99556	3.95693	4.10717	4.09112	3.97614	4.26707	3.99889	4.39382	3.87765	4.20571	3.97054	4.29966	3.82053	4.52819	3.97354	4.44706	4.50946	4.22261	3.88339	3.85266	3.8694	4.52837	3.76414	3.68709	4.05912	4.15465	3.85272	4.04009	3.74848	4.59304	4.12029	3.94671	4.31707	4.15783	3.97384	4.19207
Olfr1311	4.52924	4.26482	4.47301	4.1861	4.3075	4.14349	4.09086	4.47226	5.09454	4.24069	4.49523	4.35188	4.40756	4.23844	4.08382	4.25733	4.09201	4.07178	4.1528	4.52292	4.1925	4.43621	4.17727	3.9433	4.17326	4.58073	3.82136	4.27553	4.28143	4.68171	4.22749	4.18933	3.84012	3.8894	4.54446	4.43008	4.38014	4.11664	4.35397	4.05842
Olfr1312	3.3493	3.25847	3.55226	3.15257	3.33256	3.34752	4.25197	4.57157	4.78406	4.47745	3.8328	5.57294	3.45805	4.10434	3.38454	3.39079	3.85178	3.50047	3.33655	3.48661	3.44251	3.84448	3.16023	3.2205	3.00369	3.49198	3.61786	3.4901	2.96246	3.37061	3.31248	3.25701	3.229	3.67468	3.41709	3.36988	3.63574	3.41183	3.42547	3.25554
Olfr1313	4.43362	4.35883	4.25146	3.76269	4.02268	3.85855	4.06802	4.15972	4.18908	4.11992	4.22816	5.10908	3.70062	3.78653	4.26087	3.80615	3.96411	4.19346	3.71313	4.40083	4.26728	4.21381	3.75092	3.78963	3.86887	4.22627	3.72727	4.09529	4.30672	4.31605	3.9259	3.93551	3.84517	4.23655	4.10271	3.94355	3.96534	4.29176	3.9987	4.20104
Olfr1314	4.27127	3.84576	3.98689	3.70542	3.9737	3.58708	4.13272	4.42481	4.10106	3.91274	3.87497	4.0679	3.64983	3.68221	4.03351	4.0281	4.18027	3.85301	3.92999	3.92623	4.10341	4.16068	3.77358	3.84975	3.83239	3.92999	3.70915	3.79484	4.06983	3.90283	3.78598	3.83656	3.80218	3.96411	3.90008	3.92999	3.61606	4.16723	3.84723	3.68221
Olfr1316	3.97163	3.74917	4.00554	3.93321	3.76289	3.70809	3.80114	4.00118	3.76785	3.8991	3.75111	4.32379	3.86579	3.81284	3.93957	4.01365	4.17467	4.23846	3.73342	4.20787	3.97958	4.17995	3.8325	3.55343	3.64104	3.85972	3.68817	3.77361	4.29267	3.87935	3.84361	3.92675	3.67501	3.80474	4.15707	3.68905	4.27195	4.39203	4.03549	3.79156
Olfr1317	3.50854	3.63104	3.62238	3.42074	3.52005	3.46563	3.54423	3.3452	3.42576	3.76864	3.75039	4.04882	3.5414	3.53225	4.07465	3.52456	3.56786	3.55518	3.32623	3.58471	3.7344	3.79546	3.26569	3.28172	3.36371	3.42833	3.53719	3.39776	3.68832	3.42501	3.38959	3.55489	3.41357	4.08367	4.25903	3.42372	3.47723	3.67237	3.38457	3.62097
Olfr1318	3.79461	3.76914	3.64897	3.72351	3.95985	3.5244	3.64073	3.89698	3.94335	4.19805	3.87119	4.63143	3.62804	4.22375	3.84094	3.6908	3.80862	3.76623	3.73877	4.13548	3.58932	4.40532	3.63766	3.50308	3.39717	3.85231	4.14545	3.7028	3.72724	3.74769	3.84609	3.91267	3.62812	4.17572	3.70999	4.0598	3.64186	3.93647	3.9128	3.9987
Olfr132	4.16985	4.19499	4.23373	4.55071	4.2687	3.9997	4.33411	4.85878	4.39334	4.07977	4.17533	4.37716	4.44494	4.58677	4.25239	4.21984	3.92073	4.3631	4.2751	4.33022	4.49622	4.92474	4.09448	3.94657	4.20144	4.39637	4.15925	4.0579	4.28431	4.33022	4.01605	4.19166	4.14653	4.57112	4.48343	4.80853	4.56793	4.26721	4.34329	4.3524
Olfr1320	5.03921	4.91454	4.86889	5.08972	4.67477	4.62454	4.35408	4.50919	4.57138	4.46299	4.48648	4.67004	4.40761	4.84596	4.30112	4.51026	4.43438	4.24593	4.34883	4.63625	4.51748	4.54972	4.47325	4.37081	4.36289	5.00977	4.44078	4.56403	4.49639	4.86158	4.61414	4.34095	4.50639	4.67061	4.72156	4.69383	4.8617	4.5223	4.96847	4.46205
Olfr1321	4.32567	4.2837	4.21771	4.43388	4.18044	4.18111	4.34463	4.48494	4.92696	5.27415	4.10358	5.48516	4.29663	4.45699	4.16671	4.84526	4.46655	4.99806	4.63157	4.43977	4.59547	4.88417	3.99013	3.96295	4.0689	4.09075	3.98849	3.97935	3.85355	4.14621	4.28582	4.0291	4.1974	4.74463	4.06057	4.36637	4.6166	4.28849	4.25902	4.28478
Olfr1322	5.10662	4.55067	5.12244	4.83852	5.14139	5.02871	4.34976	4.51454	4.86684	4.58776	4.60871	4.75304	4.78776	4.88504	4.53347	4.52787	4.74457	4.98262	4.80889	4.59276	4.33589	4.62306	4.79916	4.74795	4.86523	5.01655	4.3882	4.70854	5.27891	5.08173	4.83648	4.74174	4.86792	4.40831	5.06667	5.0938	5.1516	4.94747	5.07419	4.83852
Olfr1323	3.99526	4.20574	3.98602	4.44735	3.83384	4.00392	3.90129	4.09354	3.95312	3.94383	4.05339	4.44448	3.8167	4.05923	4.02108	3.59252	4.06691	3.91147	3.73675	4.21897	4.13178	4.1955	3.9414	3.92216	3.88949	4.1944	4.00581	4.23587	4.09547	4.07095	3.98013	3.84787	4.04091	4.05339	4.15905	4.06289	4.45921	4.14103	3.96198	4.14872
Olfr1324	4.79626	4.87033	4.83662	4.55655	4.91364	4.93128	4.93157	4.92488	5.08996	4.66152	4.76762	4.85473	4.64125	4.75734	4.84953	4.59789	5.11627	4.92039	5.00557	4.87824	4.35482	5.26429	4.70576	4.62321	4.57552	5.21118	4.69736	5.01055	5.17091	4.86318	4.71145	4.95777	4.64818	5.29155	4.80152	4.66264	5.10935	5.1138	5.13373	4.87016
Olfr1325	3.60589	3.70914	3.68653	3.63316	3.58671	3.75298	3.75018	3.74808	3.80588	3.84578	3.51663	4.30718	3.60299	3.50888	3.90874	3.73099	4.17855	3.98216	4.03628	3.70289	3.58005	3.7217	3.63138	3.63998	3.76178	3.82301	3.67877	3.86274	3.54979	3.94401	3.87883	3.59323	3.62773	4.44589	3.6972	3.74905	4.08978	3.54805	3.86851	3.89257
Olfr1328	5.47866	5.5503	5.28977	5.41955	5.54619	5.27449	4.7484	4.61456	4.57352	4.61436	4.49153	4.39492	4.63416	5.08073	4.73385	5.24445	4.53309	4.96893	4.43022	4.98371	4.90266	5.57609	4.76132	4.43762	4.53926	5.0286	4.42521	4.8142	5.30577	4.91403	4.77472	4.91403	4.84677	4.91403	4.83331	5.09698	4.88942	5.12724	5.18513	4.71063
Olfr1329	5.47866	5.5503	5.28977	5.41955	5.54619	5.27449	4.7484	4.61456	4.57352	4.61436	4.49153	4.39492	4.63416	5.08073	4.73385	5.24445	4.53309	4.96893	4.43022	4.98371	4.90266	5.57609	4.76132	4.43762	4.53926	5.0286	4.42521	4.8142	5.30577	4.91403	4.77472	4.91403	4.84677	4.91403	4.83331	5.09698	4.88942	5.12724	5.18513	4.71063
Olfr133	3.14533	3.22035	3.11769	3.25182	3.07907	3.11125	3.2769	3.3558	3.40098	3.17183	3.24111	3.48028	3.33155	3.48284	3.09065	4.11006	3.56468	3.58241	3.3144	3.34092	3.26505	3.74836	2.98278	3.20236	3.04811	3.33155	3.30542	3.33559	3.36088	3.54739	3.42646	3.27114	3.33155	3.29278	3.51474	3.64511	3.45539	3.48981	3.21606	3.37242
Olfr1330	5.47866	5.5503	5.28977	5.41955	5.54619	5.27449	4.7484	4.61456	4.57352	4.61436	4.49153	4.39492	4.63416	5.08073	4.73385	5.24445	4.53309	4.96893	4.43022	4.98371	4.90266	5.57609	4.76132	4.43762	4.53926	5.0286	4.42521	4.8142	5.30577	4.91403	4.77472	4.91403	4.84677	4.91403	4.83331	5.09698	4.88942	5.12724	5.18513	4.71063
Olfr1331	5.3595	4.57833	4.74769	4.67035	4.70056	4.78872	5.11844	5.30527	5.53324	4.51298	5.4937	6.34654	4.31159	4.55064	4.60383	5.02602	4.10525	5.60012	4.50184	5.56556	4.73578	5.33499	4.09864	4.46754	4.13977	4.83673	4.6212	4.62023	4.83213	4.95461	3.83872	4.73463	4.63114	4.75482	4.98981	4.45774	5.14372	5.22077	4.36631	5.38285
Olfr1333	5.47866	5.5503	5.28977	5.41955	5.54619	5.27449	4.7484	4.61456	4.57352	4.61436	4.49153	4.39492	4.63416	5.08073	4.73385	5.24445	4.53309	4.96893	4.43022	4.98371	4.90266	5.57609	4.76132	4.43762	4.53926	5.0286	4.42521	4.8142	5.30577	4.91403	4.77472	4.91403	4.84677	4.91403	4.83331	5.09698	4.88942	5.12724	5.18513	4.71063
Olfr1335	5.47866	5.5503	5.28977	5.41955	5.54619	5.27449	4.7484	4.61456	4.57352	4.61436	4.49153	4.39492	4.63416	5.08073	4.73385	5.24445	4.53309	4.96893	4.43022	4.98371	4.90266	5.57609	4.76132	4.43762	4.53926	5.0286	4.42521	4.8142	5.30577	4.91403	4.77472	4.91403	4.84677	4.91403	4.83331	5.09698	4.88942	5.12724	5.18513	4.71063
Olfr1336	4.94086	5.06372	4.99592	4.9705	4.84206	4.95636	4.77455	4.64746	4.21848	4.76221	4.83765	4.68682	5.17258	5.08032	5.1843	5.2625	5.20797	4.48272	5.35507	4.50061	4.29172	5.20515	5.26925	4.89679	5.19086	5.82931	5.05409	5.19213	5.06798	4.99207	4.98527	5.27821	5.15734	5.30585	5.10932	5.46855	5.46821	5.31851	5.61831	4.81083
Olfr1337	5.47866	5.5503	5.28977	5.41955	5.54619	5.27449	4.7484	4.61456	4.57352	4.61436	4.49153	4.39492	4.63416	5.08073	4.73385	5.24445	4.53309	4.96893	4.43022	4.98371	4.90266	5.57609	4.76132	4.43762	4.53926	5.0286	4.42521	4.8142	5.30577	4.91403	4.77472	4.91403	4.84677	4.91403	4.83331	5.09698	4.88942	5.12724	5.18513	4.71063
Olfr1338	5.47866	5.5503	5.28977	5.41955	5.54619	5.27449	4.7484	4.61456	4.57352	4.61436	4.49153	4.39492	4.63416	5.08073	4.73385	5.24445	4.53309	4.96893	4.43022	4.98371	4.90266	5.57609	4.76132	4.43762	4.53926	5.0286	4.42521	4.8142	5.30577	4.91403	4.77472	4.91403	4.84677	4.91403	4.83331	5.09698	4.88942	5.12724	5.18513	4.71063
Olfr1339	5.9143	5.64736	5.74908	5.92954	5.73427	5.67434	5.52811	5.77874	5.55551	5.78892	5.59258	5.49981	5.46641	5.91736	6.16266	5.85916	5.28171	5.64014	5.6144	5.52296	5.60095	5.84446	5.90697	5.78076	5.72787	6.20216	5.5953	5.66255	6.06533	6.28197	5.71144	5.74908	5.8925	5.73187	5.34251	6.22985	5.98035	6.04093	5.90168	6.04704
Olfr134	2.93233	2.99686	2.87734	3.15887	3.09046	3.10724	3.26268	3.2115	3.65987	3.30654	3.17098	3.26714	3.16741	3.19489	3.72576	3.41206	3.64145	3.59452	3.70343	3.282	2.94574	3.43994	2.90738	2.84387	2.88607	2.82244	2.756	2.80093	3.26028	2.84212	2.86178	3.02104	2.79029	3.44863	3.22698	2.82463	3.22072	3.19504	2.95046	3.03586
Olfr1340	5.24458	5.11252	5.32317	5.37817	5.21635	5.03222	5.85285	5.2925	5.60418	5.36585	5.3929	5.21931	5.56837	5.47095	5.36087	5.45256	5.76068	5.32977	5.44523	5.61416	5.58193	5.3483	5.49455	5.42996	5.23052	5.7872	5.41732	5.23734	5.38027	5.70323	5.22626	5.44871	5.14933	6.43952	5.58982	5.52284	5.46677	6.04137	5.82782	5.7877
Olfr1341	4.33484	4.12025	4.14388	4.14487	4.19382	3.89941	4.35293	4.26435	4.54241	4.78073	4.43114	4.22438	4.07171	4.18921	4.50571	4.88133	4.24988	4.40595	4.17237	4.54248	4.37558	4.80167	4.1592	4.01425	4.12519	4.40671	4.24052	4.25385	4.63572	4.40448	4.35758	4.13027	4.08461	4.82868	4.34752	4.30763	4.72779	4.92131	4.62159	4.24973
Olfr1342	5.3386	5.12107	5.2556	4.93484	5.08268	5.09789	5.07194	4.88302	4.89615	5.11192	5.32541	4.48987	5.11571	4.98583	4.86131	5.26315	4.94324	4.7387	5.2184	5.79763	4.97012	5.45672	5.37969	4.89129	5.1758	5.56768	4.94551	4.80644	5.47702	5.62257	5.32581	5.23036	5.33545	5.04623	4.94687	5.72881	5.4788	5.18167	5.28869	5.45223
Olfr1344	5.66514	5.52289	5.63609	5.20726	5.64747	5.39898	5.11327	4.99754	4.98789	4.89556	5.08744	5.18318	5.38641	5.2837	4.97289	5.27837	5.22044	5.26995	5.03677	5.5173	5.39532	5.62836	5.54312	5.46866	5.61043	5.9322	5.41561	5.6502	5.62299	5.76262	5.47345	5.40698	5.50175	5.38857	6.01128	5.87181	6.04882	5.94319	5.90903	5.69909
Olfr1346	6.0178	5.8122	5.85931	5.71728	5.97418	5.71698	6.16077	5.78621	6.2267	6.30618	6.14083	6.00828	6.25556	5.75805	5.9248	6.01202	6.30342	6.44915	5.79386	6.51384	6.29126	5.71984	6.22633	5.83865	5.69174	5.97127	6.1303	6.22382	6.0873	6.20932	5.77981	5.93083	5.68921	6.89433	6.77785	6.13898	6.32953	6.80955	6.4654	6.41702
Olfr1347	6.93485	6.66759	6.83597	6.75089	7.06712	6.47992	6.5779	6.96897	6.84351	7.02898	6.9735	6.59956	6.03919	6.80402	5.70673	6.41807	6.34937	6.10573	5.7447	6.93776	6.3049	5.79876	6.41887	6.53958	6.29099	7.28231	6.67473	6.49006	6.08433	6.85092	6.39265	6.42614	6.32977	7.07047	6.84597	6.82303	7.3086	7.38531	7.19426	7.04383
Olfr1348	5.333	5.02341	5.31143	5.15295	5.14139	4.96016	5.20355	4.81928	4.63466	4.65104	4.38108	4.25954	4.997	4.69003	5.1753	4.87823	4.63668	5.0116	5.13766	4.99845	4.70381	5.17386	5.50076	5.28794	5.38239	5.32261	5.19509	5.00161	5.43927	5.5416	5.24554	5.1214	5.02266	4.86654	5.63834	5.77119	5.68617	5.75409	5.19535	5.38409
Olfr1349	6.62037	6.40199	6.42078	6.25882	6.40196	6.18434	5.91701	5.83294	5.8997	5.71484	5.98913	5.71612	6.13761	5.955	6.24221	6.01052	6.33696	6.02829	6.0127	6.00044	5.87719	5.84321	6.10178	6.38662	6.40171	6.86229	5.98738	6.36959	6.32169	6.79442	6.25354	6.59014	6.06548	6.34098	6.6274	6.67849	6.52155	6.93512	6.62829	6.86314
Olfr135	3.40176	3.50179	3.49567	3.54299	3.307	3.32123	3.25199	3.33655	3.31255	3.44181	3.31866	3.27954	3.51029	3.43157	3.54389	3.52391	3.39494	3.534	3.53793	3.56734	3.53549	3.66324	3.22433	3.22192	3.10757	3.43395	3.36141	3.20387	3.41805	3.70858	3.07483	3.01708	3.19396	3.51775	3.62476	3.34122	3.38201	3.56212	3.28468	3.41805
Olfr1350	5.31799	5.32716	5.43008	4.78024	4.88393	4.86683	5.1241	4.98018	4.6193	4.95019	5.23182	4.43867	5.03544	5.11564	5.22538	4.83248	5.08399	5.26656	4.86338	5.40768	5.46107	5.42704	5.21593	5.17219	5.12444	5.56446	4.87189	5.30346	5.27886	5.22528	4.8995	5.38837	4.99438	5.55749	5.17011	5.45003	5.52204	6.04183	5.32067	4.99192
Olfr1351	4.28046	4.14864	4.14849	4.15389	4.08494	4.33713	4.21384	4.13684	4.27012	4.644	4.01964	4.32823	4.16412	4.06253	4.41388	4.26082	3.86609	4.73883	4.47567	4.95372	4.20735	5.25341	4.27969	4.20982	4.2293	4.36765	4.12972	4.24063	4.32462	4.80301	4.42414	4.57835	4.44392	4.39117	4.41299	4.42707	4.25203	4.2519	4.42893	4.22738
Olfr1352	3.9752	4.11929	3.75671	4.00327	4.10936	3.7233	3.81422	4.18361	4.04303	4.21807	3.97207	4.25857	4.18685	3.7323	3.79214	3.65689	3.7733	3.78954	3.7805	3.91148	3.67477	3.89872	3.99142	3.82246	4.04524	4.35142	3.89643	3.63925	4.05292	4.30139	3.61177	4.1036	4.01654	4.63505	4.07504	4.03731	3.89941	4.27445	3.80011	4.08364
Olfr1353	3.85304	3.72857	4.00799	3.95836	3.48473	3.76022	4.35681	4.83931	4.50387	4.57314	4.07616	5.18746	4.18485	4.05798	3.8621	4.06039	4.01703	4.16891	4.10615	4.22529	4.00775	4.3504	3.83746	3.75226	3.95145	4.00875	3.98225	3.81873	4.01443	4.03544	3.88251	3.95115	3.87635	4.22825	4.15341	4.10864	4.10543	3.98793	4.02531	3.85532
Olfr1354	4.86074	4.69905	4.80055	4.46137	4.62606	4.73402	4.57295	4.75054	4.95072	4.87426	4.71858	5.38436	4.17367	4.51021	4.49843	4.41712	4.77779	4.61013	4.45475	4.83811	4.76096	4.69476	4.49716	4.31303	4.50721	4.61133	4.58814	4.51148	4.56771	4.81755	4.80718	4.67958	4.33499	5.28566	4.84852	4.97075	4.67115	4.99785	5.06899	4.533
Olfr1355	4.86074	4.69905	4.80055	4.46137	4.62606	4.73402	4.57295	4.75054	4.95072	4.87426	4.71858	5.38436	4.17367	4.51021	4.49843	4.41712	4.77779	4.61013	4.45475	4.83811	4.76096	4.69476	4.49716	4.31303	4.50721	4.61133	4.58814	4.51148	4.56771	4.81755	4.80718	4.67958	4.33499	5.28566	4.84852	4.97075	4.67115	4.99785	5.06899	4.533
Olfr1356	4.08345	3.94769	3.96528	3.7899	3.72447	3.74136	3.8943	4.26146	4.08202	4.47056	4.07958	4.57573	3.68403	4.18722	3.94631	3.45259	3.86527	4.27707	3.69294	4.57705	3.95505	4.51239	3.53751	3.7223	3.85958	3.68906	3.90223	3.87268	3.88513	3.73161	4.08595	3.80768	3.59642	4.44658	3.86481	3.99888	4.06915	3.86186	4.02618	4.02449
Olfr1357	4.92345	4.91259	4.98596	4.86256	4.84606	4.74078	4.85302	4.8428	4.8428	4.75622	4.79569	5.27289	4.80039	4.67334	4.80356	4.87188	4.84049	4.8428	4.79235	5.11647	4.72409	5.15052	4.8428	4.79353	4.78564	5.29523	4.70851	4.61112	4.75547	4.75547	4.8428	4.66695	4.66504	5.36772	5.5077	4.77024	5.28674	4.98465	4.9648	5.22471
Olfr1359	5.48645	5.52563	5.48108	5.28178	5.28973	5.37883	5.7541	5.62021	5.67379	5.63538	5.54806	5.75185	5.39915	5.28688	4.95497	4.99223	5.37262	4.74877	5.45141	5.18799	5.05422	5.35992	5.03559	5.01154	5.01894	5.65279	4.99348	5.47911	5.24958	5.59331	5.20241	5.43194	4.93262	5.21136	5.50711	5.43386	5.3809	5.90318	5.53061	5.2251
Olfr136	3.23646	3.42667	3.27046	3.40263	3.24788	3.07233	3.59665	3.56695	3.9076	3.7657	3.45423	4.38122	3.11686	3.28631	3.30971	3.14221	3.26102	3.48594	3.42138	3.64447	3.37436	3.37913	3.35744	3.23295	3.35935	3.16706	3.40263	3.37269	3.58373	3.57163	3.20615	3.40152	3.39267	3.91568	3.54567	3.44758	3.60499	3.82589	3.52735	3.52298
Olfr1360	5.48645	5.52563	5.48108	5.28178	5.28973	5.37883	5.7541	5.62021	5.67379	5.63538	5.54806	5.75185	5.39915	5.28688	4.95497	4.99223	5.37262	4.74877	5.45141	5.18799	5.05422	5.35992	5.03559	5.01154	5.01894	5.65279	4.99348	5.47911	5.24958	5.59331	5.20241	5.43194	4.93262	5.21136	5.50711	5.43386	5.3809	5.90318	5.53061	5.2251
Olfr1361	5.01513	5.26294	4.98102	5.01844	4.88736	4.93031	5.20077	5.69275	5.5172	4.87975	5.16661	5.84372	5.1736	4.72984	5.52982	5.31069	4.55768	4.83729	4.72763	5.01107	4.76951	5.19511	5.29042	5.28891	5.43211	5.59181	5.03962	5.04628	4.81321	5.17741	5.14485	5.27883	5.26397	5.35144	5.58569	5.47632	5.22438	5.01755	5.5534	5.41878
Olfr1362	5.76196	5.67316	5.82822	5.70579	5.61788	5.59894	5.85961	5.61901	5.87053	5.84981	5.85443	5.81935	5.71667	5.5844	5.41561	6.09454	5.47713	5.76565	5.43416	6.03043	6.30222	5.76528	5.93851	5.89579	5.7899	5.91077	5.79667	6.07246	5.36776	5.82156	5.89159	5.82258	5.90981	5.95147	5.66735	5.86994	6.07582	6.27149	5.94081	6.17565
Olfr1364	5.89601	5.85843	5.73698	5.70846	5.79026	5.5852	5.66343	5.53971	5.32854	5.64642	5.69652	5.33083	5.69963	5.7804	5.56395	5.77364	5.85194	5.73875	5.59744	5.48642	5.27274	5.45217	5.76115	5.61289	5.69441	5.67102	5.48476	5.61685	5.96185	5.79084	5.60595	5.72208	5.51288	5.96285	5.25037	5.84223	5.32306	5.97486	5.75606	5.62786
Olfr1366	5.69071	5.4113	5.51042	5.05968	5.35005	5.39142	5.53896	5.59744	5.44638	5.63534	5.83859	5.8514	5.55372	5.50775	5.37636	5.65713	5.80799	5.45767	5.42273	5.41948	5.2635	5.37855	5.22123	5.26779	5.16811	5.55334	4.88873	5.24959	5.59935	5.95113	5.52334	5.44594	5.34048	5.41424	5.10654	5.65013	5.47457	4.99852	5.51053	5.38427
Olfr1367	4.08283	4.0324	3.90664	3.91797	3.94933	3.82014	3.89644	3.76931	3.99936	4.03175	3.7951	4.48957	3.868	4.17387	3.96519	4.03416	4.55835	4.12128	4.2412	4.01512	4.09558	4.38712	4.18213	3.92894	4.0223	4.05728	3.86314	3.93853	4.05198	4.05951	3.76165	4.16893	3.86701	4.75492	5.03235	3.91381	3.82811	4.31039	3.90205	4.15071
Olfr1368	3.65514	3.65675	3.72627	3.80566	3.72102	3.60229	3.99246	4.21653	4.0164	3.91536	3.78037	4.01148	3.80903	3.60694	3.55701	3.8119	4.01907	3.56042	3.81913	3.93234	3.61092	3.79966	3.77892	3.70038	3.66444	3.77939	3.7256	3.74693	4.11659	4.23895	3.73355	3.78242	3.69554	4.47402	4.10348	4.14211	3.72351	3.75681	3.68457	3.73735
Olfr137	5.34402	5.11155	5.18713	5.07025	5.24861	5.01178	5.12493	4.68526	4.95043	4.92857	5.14649	5.57401	5.11409	4.97218	5.08443	4.82765	4.89007	5.04723	4.47525	5.75918	5.08482	5.21723	4.90207	5.0385	5.11111	5.08262	4.67872	5.13942	4.86187	4.86796	4.88964	4.87905	4.92814	5.39334	4.8995	5.27775	4.93597	4.67739	5.40131	5.47442
Olfr1370	4.9405	4.51411	4.6025	4.6384	4.58152	4.46327	4.30248	4.85135	4.43158	5.07643	4.82793	5.18628	4.58373	4.54863	4.68167	4.5561	4.26754	4.35198	4.56204	4.41025	4.4165	4.54745	4.55763	4.45073	4.44776	4.69076	4.56626	4.58072	4.75638	4.93357	4.58054	4.47145	4.843	5.29568	4.65675	4.77242	4.37959	4.68353	4.59212	4.59678
Olfr1371	5.34648	5.35855	5.02244	5.20952	5.16077	4.97947	6.23153	4.44909	5.18119	4.65834	4.92453	5.0435	4.22951	4.20914	4.25204	4.82112	4.4461	5.05766	4.53809	5.20914	5.01147	4.9295	5.06805	4.90757	5.72758	4.41649	5.16084	4.82834	4.76649	4.691	4.77368	4.72893	4.38191	4.65024	4.76785	4.91851	4.89174	5.11818	5.58646	4.94292
Olfr1372-ps1	3.91912	4.05603	4.39812	4.50189	4.06782	4.05372	3.88927	3.52083	3.74189	3.68731	3.41666	3.42307	3.87506	3.37243	3.94495	3.60577	3.53695	3.73878	4.33624	3.97636	3.68192	4.24135	4.1395	3.72964	4.63889	3.99279	4.17582	3.84338	4.28856	4.22247	4.09207	3.81714	3.65273	4.71029	4.28342	4.05349	3.98558	3.99506	4.14287	5.08668
Olfr1373	5.34648	5.35855	5.02244	5.20952	5.16077	4.97947	6.23153	4.44909	5.18119	4.65834	4.92453	5.0435	4.22951	4.20914	4.25204	4.82112	4.4461	5.05766	4.53809	5.20914	5.01147	4.9295	5.06805	4.90757	5.72758	4.41649	5.16084	4.82834	4.76649	4.691	4.77368	4.72893	4.38191	4.65024	4.76785	4.91851	4.89174	5.11818	5.58646	4.94292
Olfr1377	4.51463	4.60431	4.77104	4.75378	4.60877	4.415	4.33338	4.39756	4.27486	4.29382	4.622	4.33447	4.79584	4.74202	4.74311	4.45458	4.91195	4.6212	4.75548	4.85653	5.026	4.92643	4.66843	4.49469	4.50373	5.07972	5.06358	5.14806	4.77104	4.80166	4.84777	4.77104	4.83105	5.76542	4.71616	4.8053	4.9904	4.99657	4.81534	4.5481
Olfr1378	6.44111	5.71121	6.03533	5.96746	5.90511	5.73445	5.1786	5.03807	4.96298	5.48388	5.07854	4.82243	5.16694	4.97904	5.43627	5.36155	5.19043	5.77584	5.16162	5.5177	5.64519	5.68674	5.29042	5.23108	4.99392	5.2169	5.09137	5.24698	5.29349	5.3813	5.28849	5.56367	5.00331	5.5051	5.75392	4.85479	5.52697	5.88128	5.36606	4.8735
Olfr138	2.90257	2.90832	3.16727	2.8285	2.93579	2.86245	3.17167	3.06263	3.47844	3.17696	3.11298	3.49314	2.95998	3.2792	3.28874	3.1478	3.06414	3.80045	3.09417	3.39015	3.04104	3.32257	2.8127	3.00538	2.90685	2.83575	2.83959	2.79867	3.04283	3.28041	2.95117	3.02939	2.90122	2.93518	3.02586	2.95242	3.24416	3.22271	2.88496	3.04858
Olfr1380	5.34648	5.35855	5.02244	5.20952	5.16077	4.97947	6.23153	4.44909	5.18119	4.65834	4.92453	5.0435	4.22951	4.20914	4.25204	4.82112	4.4461	5.05766	4.53809	5.20914	5.01147	4.9295	5.06805	4.90757	5.72758	4.41649	5.16084	4.82834	4.76649	4.691	4.77368	4.72893	4.38191	4.65024	4.76785	4.91851	4.89174	5.11818	5.58646	4.94292
Olfr1381	5.34648	5.35855	5.02244	5.20952	5.16077	4.97947	6.23153	4.44909	5.18119	4.65834	4.92453	5.0435	4.22951	4.20914	4.25204	4.82112	4.4461	5.05766	4.53809	5.20914	5.01147	4.9295	5.06805	4.90757	5.72758	4.41649	5.16084	4.82834	4.76649	4.691	4.77368	4.72893	4.38191	4.65024	4.76785	4.91851	4.89174	5.11818	5.58646	4.94292
Olfr1382	5.34648	5.35855	5.02244	5.20952	5.16077	4.97947	6.23153	4.44909	5.18119	4.65834	4.92453	5.0435	4.22951	4.20914	4.25204	4.82112	4.4461	5.05766	4.53809	5.20914	5.01147	4.9295	5.06805	4.90757	5.72758	4.41649	5.16084	4.82834	4.76649	4.691	4.77368	4.72893	4.38191	4.65024	4.76785	4.91851	4.89174	5.11818	5.58646	4.94292
Olfr1383	5.29918	5.34263	5.45003	5.01729	5.276	5.19442	5.27243	5.2392	4.90846	5.676	5.50937	5.83112	5.02571	4.78908	4.4242	4.72003	4.64754	4.68117	4.87725	5.37738	4.92614	5.27645	4.71933	4.80522	4.93991	5.37705	4.87076	5.16633	4.92395	4.79629	4.86701	4.65722	4.81224	6.06115	5.57499	4.9378	5.0936	5.82672	5.42604	5.26315
Olfr1384	4.98004	4.6245	4.69973	4.72416	4.56497	4.7627	5.1405	5.00642	5.80393	4.89157	5.31035	5.44187	4.51027	4.88801	4.48991	4.5684	4.71231	4.2706	4.6105	5.07312	4.77441	4.78629	4.614	4.48365	4.43534	4.89623	4.575	4.89753	4.63748	4.96726	4.7627	4.62234	4.47809	4.74035	4.46401	4.67766	5.17243	5.00551	4.90944	4.90166
Olfr1385	4.91203	4.87116	4.90321	4.93511	4.94596	4.79651	4.27257	4.89789	5.0199	4.85254	4.49041	4.54806	4.80539	5.16856	4.75515	5.20079	5.06963	4.684	4.80782	4.76668	4.73852	4.66754	4.62281	4.69763	4.61465	4.99962	4.60749	4.90275	5.15931	4.751	4.61407	4.58413	4.7292	5.15649	4.78429	4.82649	4.63981	4.70159	4.75072	4.72407
Olfr1386	4.91203	4.87116	4.90321	4.93511	4.94596	4.79651	4.27257	4.89789	5.0199	4.85254	4.49041	4.54806	4.80539	5.16856	4.75515	5.20079	5.06963	4.684	4.80782	4.76668	4.73852	4.66754	4.62281	4.69763	4.61465	4.99962	4.60749	4.90275	5.15931	4.751	4.61407	4.58413	4.7292	5.15649	4.78429	4.82649	4.63981	4.70159	4.75072	4.72407
Olfr1387	4.23939	4.45869	4.42496	4.45869	4.48056	4.45869	4.72511	4.30091	4.43341	4.37147	4.33443	4.52887	4.17103	4.38368	4.12031	4.44523	4.51326	4.04979	4.20109	4.74044	4.40549	4.85843	4.41049	4.26936	4.32478	4.62248	4.59773	4.61497	4.07353	4.37932	4.33022	4.41371	4.12163	4.73269	4.12148	4.84273	4.56711	4.65369	4.45869	4.28921
Olfr1388	5.74133	5.47776	5.58826	5.41615	5.51699	5.57709	6.32515	5.59211	5.94042	5.74054	5.98698	5.9654	5.5992	5.11101	5.17888	5.54655	5.83149	5.39839	5.59193	5.5975	5.66373	5.97942	5.36695	5.11872	5.35379	5.91055	5.58052	5.50276	5.23367	5.89033	5.64358	5.2215	5.44524	6.07112	5.86277	5.53618	5.65681	5.96557	5.57794	5.72426
Olfr1389	4.96411	5.18126	5.20183	5.30036	5.18397	5.19843	5.30193	5.29474	5.21819	5.02223	4.96919	5.05535	5.11648	4.87743	5.20311	5.25921	4.96208	5.06432	5.18405	5.29699	5.56145	5.55792	5.05915	4.84174	5.02708	5.08566	5.2466	5.15484	5.51036	5.14868	5.30615	5.24066	5.20533	5.39253	5.09074	5.50612	5.59681	4.81098	5.38573	5.28704
Olfr139	5.71645	5.72938	5.82473	5.82778	5.50055	5.54187	5.47404	5.61485	5.23989	5.24906	5.19743	5.49879	5.67487	5.43003	5.4015	5.33165	5.64533	5.69962	5.47038	5.642	5.63311	6.04986	5.60821	5.39613	5.60214	6.20825	5.35024	5.81734	5.74324	6.17372	5.3792	5.4	5.50449	5.83379	6.06029	5.82232	6.17293	6.34548	5.97442	5.79375
Olfr1390	5.48747	5.16747	5.2864	5.57881	5.36	5.50762	4.96244	4.8305	4.9879	4.81138	5.01503	4.78398	5.28529	5.06109	5.33543	5.39863	5.20072	5.174	5.29188	5.449	4.95818	5.13513	5.29604	5.39052	5.17083	5.36937	4.9966	4.97075	5.66469	5.5226	5.64575	5.44273	5.15749	4.87163	5.27964	5.55209	5.22042	5.34437	5.77911	5.58206
Olfr1391	4.43242	4.53311	4.41671	4.60216	4.49967	4.36062	4.40674	4.00288	3.95008	4.10027	4.13696	3.6326	4.41377	4.42022	4.27598	4.18051	4.81253	4.42898	4.7712	4.75688	4.62916	4.82633	4.63544	4.61537	4.71192	4.87082	5.02147	4.39937	4.93856	4.90139	4.55934	4.68018	4.33674	4.66635	4.87629	5.02404	5.07619	5.07476	4.76924	4.56857
Olfr1392	5.38766	5.01084	5.15645	5.41644	5.11183	5.04312	5.42076	5.45205	5.70108	5.30893	5.03143	5.74885	5.47433	5.22893	5.36912	4.72132	4.63427	5.68175	5.5749	5.57324	5.58418	5.69563	5.31032	4.98377	5.03948	5.53776	5.26361	5.2754	5.50536	5.18872	5.35402	5.13664	5.22624	6.08286	5.95248	5.23383	5.52497	5.76234	5.53392	5.31293
Olfr1393	6.18491	6.23161	5.9628	6.16432	6.20255	5.97207	6.78223	6.67729	7.4447	6.99332	6.45285	7.56664	5.94128	5.98385	6.28432	6.75239	5.99113	6.28218	6.77284	6.00662	5.80139	6.3713	5.63278	5.4692	5.98493	6.84038	5.57466	6.12227	5.73019	6.4636	5.9518	6.03226	5.99658	6.29308	5.57977	6.38064	5.98954	5.71899	6.24228	5.84759
Olfr1394	6.38016	6.48416	6.53155	6.25521	6.45186	6.29017	6.48782	6.56808	6.26227	6.48437	6.41098	6.31957	6.51294	6.67443	6.73294	6.60057	6.57368	6.58557	6.32494	6.85354	6.56657	7.05555	6.65429	6.39965	6.46718	6.88914	6.24529	6.49686	6.75307	6.65718	6.62814	6.77472	6.44078	7.10967	6.67188	6.83181	6.84669	7.05781	7.21641	6.85085
Olfr1395	6.90413	7.03117	6.8114	6.91882	6.58357	6.63321	6.77585	6.72935	6.5043	6.59891	6.64709	6.62281	6.45646	6.68495	6.2921	7.04174	6.38734	6.59834	6.85456	6.10155	6.47067	6.80559	6.80939	6.61732	6.85938	7.14509	6.58748	6.72996	7.10658	6.9476	6.68376	6.78766	6.69406	6.98946	6.49332	6.82729	7.08423	7.19013	7.13968	7.05866
Olfr1396	5.12888	5.10275	5.18343	5.11903	4.9214	4.91334	4.77234	4.99637	5.38058	5.36294	5.22664	5.14541	4.83014	4.96969	5.28606	7.29551	7.27708	7.19542	6.89585	5.13508	4.79459	4.55753	4.86301	4.88352	4.7711	5.13508	5.02863	4.9371	5.49325	5.55951	5.13508	5.31277	5.05621	4.6964	4.57803	5.38414	5.45099	5.23495	5.21947	5.13271
Olfr140	5.27719	5.164	5.50695	5.55024	5.26577	5.42469	5.45367	5.2494	5.61198	5.34641	5.55321	5.19792	5.48196	5.11128	5.24155	5.45055	5.29373	5.15345	5.09873	5.33594	5.52412	5.69526	4.98386	4.84118	5.06391	5.57461	5.22415	5.63196	5.20869	5.2608	5.33256	5.39899	5.29256	5.4375	5.06362	5.56324	5.67988	5.41794	5.34667	5.33731
Olfr1402	5.53599	5.35527	5.41181	5.62142	5.37782	5.23291	5.58121	5.70682	5.86826	5.66405	5.6489	5.51763	5.17316	5.42998	5.40118	5.03679	5.84516	5.07496	5.26587	5.56393	5.23872	5.47899	5.43592	5.19291	5.59426	5.47718	5.53487	5.85457	5.43491	5.63719	5.66656	5.60067	5.62059	6.06805	5.88692	5.91805	5.71755	5.8788	5.7131	5.54928
Olfr1404	3.9808	4.09193	3.95407	4.01837	3.75078	3.87333	4.26556	4.05016	4.26501	3.94403	4.03075	4.28567	4.0701	3.90583	4.07465	3.86788	3.75668	4.00302	3.69666	4.0098	4.21889	4.12861	3.75331	3.72212	3.66729	4.08349	3.73039	4.0296	4.144	4.01071	3.84669	3.8181	3.76877	3.92387	3.85628	4.05306	3.68184	4.22484	4.07269	3.88177
Olfr1406	4.40244	4.35038	3.99194	4.17726	4.21713	4.09182	3.79352	4.01098	3.97496	3.8998	4.34415	3.98625	4.38936	4.00987	4.72201	4.75121	4.59915	4.80799	4.2751	4.42382	4.2586	4.61897	3.7434	3.64018	4.08405	4.4307	3.81486	3.93568	3.9867	3.65649	4.00912	4.32415	4.01079	3.69834	4.68502	4.20572	4.20602	4.2013	4.16669	4.09429
Olfr1408	4.36462	4.21911	4.61608	4.838	4.54529	4.26996	4.28206	4.50617	4.29494	4.39	4.56383	4.33599	4.52972	4.8915	4.45945	4.48282	4.50394	4.46037	4.68562	5.11955	4.62597	5.02865	4.29132	4.30336	4.37993	4.5775	4.22996	4.09487	4.76391	4.72231	4.27786	4.53004	4.59173	4.78189	4.78872	4.83785	4.70612	4.95661	4.43042	4.33652
Olfr141	4.43052	4.37163	3.99108	4.21257	3.984	4.00628	3.67505	4.1411	4.17249	3.72345	4.03312	4.19379	4.1444	4.00445	4.3682	4.18451	4.29287	4.49232	3.6869	4.48754	3.87824	4.26065	3.85797	3.81635	3.8539	3.75293	3.93839	3.87415	4.20342	3.84222	3.99783	4.01754	3.80088	4.31966	3.9014	3.85951	3.94433	4.05148	4.00688	3.70378
Olfr1410	6.52001	6.47816	6.63039	6.50977	6.27425	6.33055	6.76642	6.78106	6.39594	6.68351	6.73391	6.6459	6.65236	6.05649	6.23914	6.59095	6.73089	6.52568	6.6724	6.18545	6.26869	6.14658	6.47215	6.26569	6.43775	6.94344	6.50451	6.71322	6.39672	6.7207	6.46502	6.69853	6.34978	6.84494	6.18473	6.84361	6.97161	6.19763	6.83438	6.4857
Olfr1411	5.29884	5.30009	5.21212	5.37853	5.05768	5.11111	5.35029	5.49756	5.251	5.24846	5.00078	4.82218	5.17417	5.15947	5.23211	5.25553	4.51876	5.44617	5.02003	4.69431	4.94771	4.47146	4.92517	4.86914	5.00506	5.44998	5.12232	5.32962	4.95257	5.3898	5.20968	5.10083	5.00712	5.81532	5.07899	5.24765	5.38715	5.44954	5.45025	4.8106
Olfr1412	5.49827	5.45989	5.50905	5.4038	5.40147	5.2793	5.69749	5.74447	5.62708	5.78323	5.56585	5.66341	5.33213	5.72525	5.60127	5.37927	6.03659	5.56684	5.87383	5.50345	5.51658	5.23897	5.85117	5.78818	5.63493	6.13789	5.22933	5.63863	5.63863	5.58281	5.70614	5.40964	5.63863	5.55208	4.68659	5.92228	6.02365	5.7348	5.64301	5.30346
Olfr1413	6.15519	5.93234	5.99148	5.85787	5.9608	5.90231	5.43545	5.30574	5.32151	5.8887	5.60095	5.25724	5.88399	5.93457	5.69385	5.5394	5.73373	5.74186	6.09593	5.511	5.9836	5.89441	5.8187	5.73962	5.82756	6.10258	5.66573	6.04549	5.76909	6.4288	5.86596	6.29968	5.88811	5.38778	5.84546	6.12981	6.24436	6.18958	5.77676	5.9106
Olfr1414	6.59573	6.52785	6.51091	6.0791	6.05409	6.20707	5.72068	5.71149	5.00826	5.80537	5.56841	5.13353	5.80965	5.26287	5.92883	5.7106	5.96179	5.46833	5.73623	5.67414	5.75571	5.52605	6.05988	5.88318	5.84758	6.45259	5.90797	5.92309	6.32413	6.14	6.00855	6.24269	6.24107	6.23609	5.75984	6.44929	6.39294	6.60227	6.56902	6.01567
Olfr1415	6.59573	6.52785	6.51091	6.0791	6.05409	6.20707	5.72068	5.71149	5.00826	5.80537	5.56841	5.13353	5.80965	5.26287	5.92883	5.7106	5.96179	5.46833	5.73623	5.67414	5.75571	5.52605	6.05988	5.88318	5.84758	6.45259	5.90797	5.92309	6.32413	6.14	6.00855	6.24269	6.24107	6.23609	5.75984	6.44929	6.39294	6.60227	6.56902	6.01567
Olfr1416	6.59573	6.52785	6.51091	6.0791	6.05409	6.20707	5.72068	5.71149	5.00826	5.80537	5.56841	5.13353	5.80965	5.26287	5.92883	5.7106	5.96179	5.46833	5.73623	5.67414	5.75571	5.52605	6.05988	5.88318	5.84758	6.45259	5.90797	5.92309	6.32413	6.14	6.00855	6.24269	6.24107	6.23609	5.75984	6.44929	6.39294	6.60227	6.56902	6.01567
Olfr1417	5.4312	5.42777	5.31701	5.3038	5.17193	5.29194	5.5418	5.46235	5.20302	5.16746	5.41928	5.76405	5.60651	5.56086	5.13557	5.58937	5.38758	5.90822	5.58547	5.66327	5.30295	5.60802	5.15529	5.16969	5.04235	5.67299	5.07904	5.47962	5.67615	5.47035	5.31056	5.50552	5.34417	5.46397	5.42495	5.65288	5.9264	5.86323	5.93616	5.60856
Olfr1418	4.79951	4.42345	4.83341	4.74485	4.75496	5.07077	5.64454	4.89247	6.9412	6.00964	6.08582	6.16293	4.77888	4.92935	4.96994	4.61427	5.39669	5.7605	5.18288	5.93972	5.153	4.81132	4.76664	4.84799	4.45943	4.88351	4.89411	4.89975	5.00306	4.81947	5.03236	5.0194	5.0063	4.83516	5.08999	4.69082	4.39532	5.04995	4.89784	5.247
Olfr1419	5.00486	4.96853	5.12805	5.11314	4.80278	4.90918	4.5651	4.77926	4.58924	4.67566	4.85024	4.84507	4.65565	4.64757	4.98063	4.88156	5.13547	4.67246	4.5471	4.81795	4.37036	5.00455	5.15606	4.97111	4.88712	5.05358	4.62016	4.84109	4.53625	5.06745	5.10984	5.16759	4.94971	5.01311	4.91737	5.31804	5.10967	5.18689	5.10992	5.30178
Olfr142	4.07052	3.87639	3.87545	3.8662	3.8758	3.73357	4.00586	4.37998	4.60219	4.38886	4.0113	4.38986	3.7026	3.82203	3.63986	3.9231	3.93028	3.99715	3.97406	4.16555	3.95612	4.13841	3.50736	3.52585	3.73298	3.99256	3.6952	3.94714	3.78359	4.20907	3.9257	4.07419	3.72269	4.36777	4.0889	3.83372	4.41779	4.46422	3.9241	3.80679
Olfr1420	4.99172	4.87642	4.86703	4.95039	4.78173	4.73663	4.94714	4.59533	4.7292	4.42997	4.92016	4.65358	5.47576	5.42849	4.77881	4.7716	5.19078	5.21806	5.15412	5.00709	4.76453	5.02409	4.81443	4.70325	4.88363	5.06431	4.87701	4.67235	5.16956	4.82032	4.81117	4.91875	4.81434	4.96437	5.38359	4.97571	4.84549	4.87732	4.73964	4.82944
Olfr1423	4.79077	4.82379	4.54071	4.99837	4.63956	4.41678	4.7942	4.59729	4.58026	4.76789	4.81684	4.58816	4.6838	4.99713	5.00557	4.23493	4.92292	4.75714	4.49939	4.80006	4.44776	4.2118	4.63645	4.52885	4.43798	5.00005	4.52559	4.90497	5.01152	4.90635	4.47866	4.92965	4.6203	4.45209	5.22558	5.01142	4.81838	5.24177	5.1005	4.67335
Olfr1424	3.68242	3.59876	3.39136	3.56807	3.43206	3.3919	3.49689	3.56804	3.56884	3.56494	3.61807	3.53653	4.13875	3.87632	3.62937	3.83766	3.76491	4.05098	3.64276	4.16616	3.91289	4.31035	3.316	3.31752	3.34204	4.09701	3.64982	3.53934	3.93397	3.67968	3.3651	3.66989	3.25702	4.14101	3.56394	3.73377	3.79585	3.62632	3.95075	3.42071
Olfr1425	5.23868	5.19906	5.23605	5.05754	5.02647	5.00366	4.78121	4.79365	4.46202	5.00487	4.78623	4.7608	5.15346	4.46107	5.03268	4.97834	5.09532	5.28558	5.268	5.2091	4.96003	5.1113	4.88549	4.80816	4.61813	5.36113	4.91066	5.00791	5.10391	5.05957	5.02255	4.87506	4.8868	4.9053	5.2683	5.18062	5.16617	5.06331	5.05077	4.80468
Olfr1426	4.99167	4.93552	5.02326	4.83165	4.70831	5.01278	5.56203	6.00565	6.32148	5.55033	5.42883	6.55755	4.93233	5.18142	5.0365	5.43138	5.07837	5.21083	5.30797	5.23241	4.92477	5.29423	4.75289	4.84753	4.68671	4.87212	4.90631	5.14757	4.89099	4.44017	4.84453	4.85626	4.64166	5.4089	5.33404	4.73663	4.99628	4.59754	4.7867	5.01904
Olfr1427	4.54589	4.40018	4.54942	4.68033	4.56066	4.5158	4.51642	4.67149	4.57472	4.58506	4.57291	5.04856	4.90051	4.9296	4.41195	4.45448	4.83717	4.18948	4.39634	4.69758	5.15269	4.76702	4.71339	4.44118	4.56121	5.11642	4.0985	4.59283	4.35201	4.58707	4.4438	4.38798	4.39134	4.89127	5.10188	4.5528	5.09966	4.72914	4.68961	4.63342
Olfr1428	5.32352	5.25752	5.20303	5.23664	5.20022	4.99555	5.46281	5.31073	5.13704	5.76011	5.44899	5.89327	5.19272	4.89547	5.19049	5.31463	5.15442	5.15806	5.33933	5.49602	4.69013	5.02286	5.34806	5.30726	5.31968	5.3819	5.2432	5.88867	5.33065	5.19355	4.98027	5.45787	5.29099	5.52047	5.07778	5.49622	5.21532	5.4728	5.41833	5.59836
Olfr143	5.30913	4.96616	4.80551	4.66796	4.67699	4.58698	4.65971	4.88695	4.32865	4.82638	4.51197	4.84032	4.67407	4.83432	5.01783	4.95956	4.64776	4.58046	5.0592	4.82828	4.7908	5.36012	4.51259	4.57613	4.45894	4.84756	4.7529	4.63763	4.71741	4.74163	4.71858	4.68208	4.53706	4.90376	4.93406	5.02265	4.63688	4.85443	4.56753	4.61829
Olfr1431	4.16339	4.10714	3.99046	3.52179	3.6518	3.77515	4.63494	4.30744	4.20766	4.48759	4.72346	4.71126	4.31742	4.10737	4.05763	4.0654	3.75876	4.19493	4.46844	4.78407	4.31878	4.85447	3.74707	3.76706	3.50395	3.88617	3.70103	3.80565	3.83076	3.5099	3.8156	3.98268	3.75441	4.05622	4.03444	3.70172	4.25038	3.86159	3.85422	3.80479
Olfr1434	2.97913	3.03459	3.05706	3.14902	3.1084	2.83009	3.15489	3.22097	3.67875	3.58235	3.38666	3.55391	3.17388	3.35798	3.54979	3.13505	3.49173	3.41351	3.14434	3.56642	3.2374	3.55494	3.01529	2.97585	2.91328	2.96885	3.11653	2.83846	4.04542	3.03977	3.35863	3.1557	3.009	4.46152	3.50057	3.09306	3.41011	3.98176	2.8861	3.29519
Olfr1436	3.18978	3.40919	3.27899	3.26098	3.37682	3.47758	3.33515	4.18428	4.39891	3.55628	3.88544	5.1245	3.35243	3.06163	4.33573	4.40609	3.1749	3.14914	3.07394	4.35638	3.79475	4.58473	2.92133	3.17634	3.00866	3.46185	3.7105	3.06306	3.49767	3.40055	2.9898	3.00433	2.87541	2.6789	3.78795	3.26318	3.29447	3.34374	3.06952	3.40829
Olfr1437	4.57524	4.36303	4.23473	4.24239	4.33051	4.2509	4.51821	4.51137	4.56245	3.99502	4.22727	4.693	4.53261	3.98811	4.60109	4.21066	4.36287	4.49715	4.36305	3.86464	4.23987	3.9278	3.81498	3.92116	3.83753	4.3449	4.05588	4.38613	4.43666	4.52633	4.12972	4.3465	4.19061	4.31833	4.50455	4.14986	4.13643	3.80271	4.07385	4.13301
Olfr1440	4.7424	4.74704	4.74704	4.691	4.55526	4.5876	4.67056	4.53902	4.28177	4.78008	4.60294	4.51339	4.65627	4.39079	4.56971	4.57622	4.82094	4.86614	4.27454	4.81936	4.46705	4.79077	4.88182	4.60656	4.91108	5.24674	4.79478	4.92105	4.71035	5.10327	4.76688	4.85015	4.86579	5.35333	5.20835	5.11936	5.05797	4.80222	4.85228	4.96316
Olfr1441	4.53532	4.42663	4.49919	4.24868	4.23354	4.21522	4.53734	4.29514	4.31657	4.4272	4.45776	4.89841	4.33395	4.16461	4.40584	4.40625	4.41982	4.20676	4.20461	4.88555	4.40527	4.48275	4.61192	4.47945	4.2587	4.60585	4.34788	4.4272	4.49084	4.59064	4.22292	4.38524	4.39825	4.71877	4.09904	4.92581	4.58236	4.63511	4.5999	4.57802
Olfr1442	3.80444	3.94458	3.96635	3.96952	3.9183	3.98725	4.15501	3.83033	4.44077	4.66845	4.05431	4.48282	3.81688	4.08355	4.07941	4.35023	4.09496	4.06797	3.83148	4.39863	4.1897	4.89786	3.71496	3.89966	4.03214	4.09652	3.89785	3.77492	4.0905	3.97319	4.00868	3.94617	3.855	4.07941	4.07941	4.29211	4.06647	4.05941	3.93717	4.28245
Olfr1443	3.17316	3.39949	3.24662	3.25451	3.23071	3.0191	3.4871	3.67681	3.55228	3.32697	3.7175	3.60215	3.28826	3.55164	3.40301	3.25134	3.54399	3.57833	3.71483	3.61594	3.60808	3.60784	3.16082	3.25883	3.14725	3.2365	3.46633	3.3652	3.3781	3.41723	3.47247	3.14117	3.33161	3.44869	3.4895	3.53247	3.67041	3.54566	3.44839	3.4093
Olfr1444	4.18594	4.47811	4.05129	4.26756	4.19628	4.05563	5.19716	4.49227	4.90142	5.04331	4.5503	5.22573	4.33165	4.61942	4.79107	4.54053	4.63269	4.35202	4.50252	4.49173	4.04094	4.03849	4.1384	3.92851	4.27587	4.23647	3.81319	4.5188	4.429	4.15722	4.33534	4.28246	4.38296	4.43653	4.19243	4.30658	4.4032	4.07815	4.63963	4.16287
Olfr1445	4.4539	4.31469	4.38973	4.25127	4.123	4.28917	4.39806	4.26009	4.43338	4.29766	4.22808	4.19577	4.41385	4.36168	4.52692	4.52547	4.70482	4.43925	4.50451	4.69289	4.25364	4.27671	4.15664	3.68878	4.05211	4.28881	4.02074	4.43228	4.16141	4.33582	4.16628	4.24731	4.18639	4.20524	4.03019	4.67974	4.09283	4.47196	4.278	4.30192
Olfr1446	3.76295	3.81122	3.64833	3.71106	3.522	3.58744	3.67431	3.71106	3.87448	3.64083	3.48786	3.89309	3.79592	4.02674	3.5968	4.25155	3.8727	3.73306	3.46825	3.77169	3.71106	4.15643	3.39676	3.43198	3.44999	3.58157	3.51086	3.53244	3.38223	3.6206	3.66021	3.71106	3.5531	3.86983	3.82351	3.70588	3.64881	3.42987	3.65317	4.56191
Olfr1447	3.63276	3.53444	3.8467	3.5817	3.50437	3.67718	3.78785	3.79493	3.68865	3.76918	3.88654	4.18084	3.59528	4.12888	4.35566	4.27869	4.03914	4.89113	4.26026	5.071	3.86902	4.28062	3.54004	3.43505	3.63177	3.71951	3.63244	3.3815	4.10474	3.8782	3.56986	3.88176	3.29186	3.88101	4.21285	3.70769	3.90248	3.92028	3.75149	3.80929
Olfr1448	3.65926	3.46459	3.40064	3.35003	3.51383	3.37386	3.3059	3.15865	3.68009	3.35143	3.12637	3.71146	3.47032	3.37626	3.68137	4.07508	3.1532	3.81896	3.20202	3.51359	3.50939	3.93061	3.14155	3.09608	3.2673	3.34122	3.2628	3.38848	3.75534	3.49016	3.22315	3.36559	3.29717	3.58649	3.76054	3.42221	3.42947	3.87154	3.75373	3.20399
Olfr1449	4.81534	5.12969	4.89713	4.83223	4.84831	4.75142	4.75299	4.81694	5.16177	4.86526	4.74482	5.07458	4.48387	4.83594	4.73023	4.80515	4.59669	4.8561	4.54597	5.2153	4.69172	5.38753	4.72435	4.72402	4.75654	4.60188	4.78751	4.71833	5.11533	5.10318	4.80338	5.0592	4.6261	5.30071	5.22531	4.86545	4.84258	4.95574	4.85271	4.82527
Olfr145	4.86709	4.84452	4.5756	4.65281	4.75151	4.61247	4.87373	5.26265	5.71375	5.08609	5.15974	5.90574	4.60242	4.57278	4.52613	4.69265	4.5264	4.39346	4.72777	4.69824	4.6788	4.7899	4.65626	4.38363	4.51022	4.98561	4.23515	4.6922	4.70494	4.84876	4.33022	4.91913	4.633	4.64018	4.50095	4.82072	5.01343	4.84979	4.76243	5.04884
Olfr1450	4.46574	4.54529	4.3347	4.42904	4.41358	4.36166	4.59164	4.4685	4.39142	4.75137	4.53818	5.65798	4.47894	4.74941	4.58444	4.71018	4.47618	4.6991	4.16774	4.94321	4.69063	4.73662	4.20705	4.37366	4.26812	3.95536	4.37013	4.67376	4.30666	4.69106	4.58924	4.68101	4.26138	4.31909	4.76285	4.4177	4.69593	4.67481	4.56861	4.2388
Olfr1451	3.69698	3.68957	3.63338	3.71565	3.68704	3.60822	3.58384	3.65139	3.89322	3.85805	3.8576	4.60114	3.62055	4.05052	3.7534	3.61767	3.96001	4.13586	3.94548	3.99825	3.69698	3.88611	3.37487	3.48241	3.44556	3.6338	3.5442	3.76098	3.33547	3.69698	3.48444	3.53029	3.57066	3.77691	3.5726	3.54912	3.58292	3.49072	3.63759	3.77626
Olfr1453	3.83613	4.01213	4.10257	3.95988	3.77394	4.00036	3.7636	4.23789	3.80954	4.08056	4.034	4.42452	3.83156	4.13808	4.15176	4.41805	4.31388	3.91326	4.68547	4.57861	4.3149	4.3852	3.7861	3.645	3.66822	4.08274	4.02756	4.04242	4.0359	4.1556	3.77693	3.94863	3.96559	5.00758	4.29609	3.94575	4.1188	4.11682	4.26769	3.99021
Olfr1454	3.57444	3.6536	3.46043	3.52898	3.22523	3.51787	3.64881	3.47725	4.40066	3.73732	3.59923	4.67225	3.47352	3.63433	3.82867	3.729	3.46781	3.6687	3.66786	3.82432	3.40502	4.06271	3.46008	3.2803	3.14634	3.69849	3.46721	3.27169	3.43073	3.36848	3.37981	3.3511	3.30253	3.70652	3.29303	3.38623	3.24158	3.45438	3.45995	3.28398
Olfr1457	3.12277	3.18335	3.20146	3.13089	3.073	3.05666	3.34733	3.28862	3.31874	3.5081	3.35922	4.1433	3.40916	3.62967	3.68421	3.61202	3.70252	4.31491	3.29792	4.01077	3.55146	3.74112	3.09341	3.06642	3.13162	2.98064	3.39584	3.36302	3.10313	3.19699	3.15962	3.16078	3.22158	3.71154	3.0634	3.03733	3.07305	3.24414	3.10729	3.31908
Olfr1459	3.50061	3.60608	3.75573	3.52521	3.60578	3.51239	3.66867	3.60025	3.968	3.44265	3.3011	4.09587	4.17998	3.7599	4.10329	4.1801	3.18472	3.98962	3.626	3.49268	3.78445	4.07754	3.39878	3.44128	3.44756	3.50288	3.42447	3.69132	3.46639	3.45884	3.86322	3.64222	3.53727	3.65105	4.03948	3.51663	3.77155	3.5525	3.73984	3.62251
Olfr146	4.04408	4.02031	3.83624	3.94689	3.73716	3.83809	3.77357	3.69721	3.67699	4.06296	3.98461	3.90956	4.01422	4.55853	4.11637	4.25733	3.86322	4.30169	4.23995	3.90507	3.88422	4.1405	3.5616	3.65139	3.69674	3.8368	3.95668	3.74253	3.69976	3.86511	3.54598	3.72073	3.55859	3.98893	4.09469	3.74825	3.93693	3.65522	3.59697	3.80215
Olfr1461	4.3134	4.16547	4.09802	4.29606	4.21494	4.22256	4.62412	5.41552	5.46787	5.55497	5.39644	6.39025	4.33881	4.21558	4.38731	4.37423	4.56488	4.1551	4.22338	4.96465	4.22851	4.42123	4.07971	4.03047	4.09509	4.23837	4.02504	4.43351	4.60526	4.29975	4.26521	4.19746	4.06772	4.16248	4.32509	4.51649	4.40656	4.09871	4.06152	4.1035
Olfr1462	3.24852	3.17616	3.28791	3.26242	3.31751	3.18653	3.46104	3.39969	3.51419	3.16799	3.16543	3.8956	3.28063	3.43459	3.59013	3.65783	3.80623	3.48995	3.26252	3.55027	3.33204	3.68252	3.37057	3.19428	3.23662	3.64755	3.35265	3.22665	3.65277	3.82213	3.41692	3.36684	3.38113	4.07932	3.34641	3.31273	3.42349	3.77723	3.46619	3.88882
Olfr1463	5.33426	4.85536	5.429	4.84902	4.95166	4.84959	4.87706	4.81794	4.64357	4.86041	4.41213	4.1342	4.68727	4.56343	4.37182	4.89534	5.21513	4.17287	3.90962	4.79422	4.22884	4.3056	5.0926	4.61149	5.36545	5.40809	4.37968	4.50823	4.98227	4.93937	4.7892	5.41297	4.88217	4.4671	5.32489	4.95991	4.71595	4.75826	5.33529	5.2052
Olfr1465	5.00591	4.66238	4.65048	4.80195	4.94107	4.61163	5.25573	5.06473	5.22211	5.30962	5.04253	5.43889	5.2377	4.89533	4.82086	5.38665	4.82834	5.28518	5.04368	5.36823	5.01762	5.67005	4.76321	4.70269	4.71868	5.11046	4.50995	4.7396	4.58195	4.68935	4.87716	4.87873	4.75837	5.70543	5.13468	4.92873	4.84853	4.57032	4.72222	5.14074
Olfr1466	3.68733	3.81517	3.76491	3.80602	3.77214	3.7271	3.91571	4.3291	4.38994	4.1803	3.83724	4.59755	3.98978	4.05049	4.29681	4.02104	4.00537	4.37923	3.98552	3.97467	3.82225	3.88988	3.69633	3.56119	3.77211	3.98262	3.89859	3.79035	4.2074	4.34251	3.8164	3.89859	3.75843	4.16505	3.70822	4.20433	4.03529	3.89859	3.71801	3.65222
Olfr1467	4.07056	3.85507	3.90263	3.94534	3.91396	3.80849	4.27883	4.48258	4.34737	4.12801	4.08577	4.67912	4.14034	4.00484	3.7354	3.40062	4.00793	3.56837	4.05985	4.02606	3.61586	4.1567	3.77003	3.5748	3.66166	4.07406	3.72225	3.78815	3.74383	3.99426	3.48822	3.82877	3.87252	4.32619	4.57104	3.79615	3.92729	4.12445	3.97599	3.8262
Olfr1469	3.8169	3.85394	3.66731	3.79698	3.95438	3.76674	4.08546	4.4378	4.07996	4.30036	4.13904	4.78456	4.02943	3.62657	3.87454	4.04459	3.89289	3.80815	3.79855	3.90269	3.7733	3.98592	3.57242	3.63104	3.55293	3.86596	3.86026	3.81719	3.87051	3.91076	3.62775	3.93358	3.58355	3.90216	3.80815	3.97578	3.90945	3.86778	3.94946	3.75969
Olfr147	5.76669	5.75772	5.69628	5.83744	5.5698	5.68238	5.96442	5.93708	5.97004	6.17423	5.83308	6.54186	5.88581	5.83312	5.6244	5.71953	5.8886	5.691	5.78107	5.53031	5.41897	5.85871	5.60606	5.48246	5.40942	6.09564	5.4118	5.70554	5.58822	5.74782	5.54335	5.57301	5.73312	6.31854	5.73312	5.79444	5.93669	5.8098	5.49466	5.81785
Olfr1471	3.79414	3.78499	3.85421	3.35514	3.76607	3.2685	3.73917	3.1579	3.86159	4.29382	3.49352	4.32346	3.20849	3.48284	3.30123	3.86969	3.02569	3.63325	3.34289	4.09697	3.35514	3.17254	3.29203	3.35807	3.09046	3.48369	3.11442	3.36496	3.35514	3.34289	3.50608	3.38422	3.26672	4.04702	3.72335	3.83559	3.35002	3.82849	3.29333	3.17027
Olfr1472	3.83949	3.64739	3.71784	3.57701	3.40619	3.38797	4.00803	3.58701	3.50495	3.97614	4.24213	4.53191	3.65673	3.5612	3.60789	3.71784	3.78684	4.2479	3.72856	4.14616	3.48427	4.14183	3.62691	3.649	3.45774	3.54265	3.69777	3.5831	3.71784	3.87295	3.87567	3.82334	3.79965	4.09622	3.78681	3.40423	4.10615	3.76074	3.74421	3.89138
Olfr1474	4.24106	3.98822	4.0446	4.09338	3.86754	3.83966	3.74825	4.09912	3.93656	3.95933	4.19175	4.56586	3.47515	3.81535	3.73643	4.02629	3.8014	4.31516	3.47959	4.13879	4.06468	3.80748	3.59943	3.80741	3.7059	3.78768	3.57514	4.05505	3.85294	4.02857	3.75778	3.83269	3.61489	4.40625	4.35946	3.6212	4.16254	4.13789	4.1039	3.91292
Olfr1475	3.30849	3.33883	3.08537	3.54304	3.05582	3.15477	3.9366	3.63567	4.10889	3.74795	3.73498	4.50969	3.2756	3.795	4.07465	4.61115	3.78883	3.96347	3.84511	4.86825	3.89165	4.72693	3.22415	3.02658	3.07387	3.40665	3.2965	3.34599	3.48662	3.22415	3.30727	3.4343	3.37013	3.81837	4.60077	3.19259	3.76314	3.77274	3.43612	3.59748
Olfr1477	2.85107	2.99593	2.76713	3.02459	2.56241	2.85841	3.4699	3.31657	4.37892	3.99172	3.55024	4.87129	3.11417	2.97795	2.87591	2.85125	3.16697	2.97633	3.17025	2.92454	3.6901	3.64826	2.64458	2.92654	2.72483	2.93557	2.95399	2.71573	2.97805	2.7883	2.79812	3.01868	2.91361	3.60018	3.22178	2.81617	3.30282	3.15537	2.66505	2.91945
Olfr148	4.61859	4.71702	4.73954	4.68827	4.55267	4.67731	4.97818	4.8476	4.92785	5.04921	4.95978	5.45101	4.40086	4.83293	4.62014	4.97504	4.6261	4.70901	4.79175	5.01261	4.63058	4.57695	4.33652	4.36324	4.36667	4.67717	4.86454	4.59806	4.73785	4.61552	4.58602	4.51349	4.57206	4.82599	5.30617	4.5657	4.96266	5.71272	4.73366	4.5742
Olfr1480	3.9778	3.89796	3.84684	3.98651	3.89484	3.72888	4.60192	3.93908	4.14661	4.33802	4.04536	4.39056	3.83843	4.3062	4.00152	4.20616	4.32555	3.76662	3.90345	4.25535	4.00476	4.88278	3.62984	3.69921	3.66636	3.8954	3.71717	3.77568	3.75758	3.97296	3.92965	3.9778	3.77152	4.04094	3.95992	3.78669	3.71959	4.13254	3.78761	3.75905
Olfr1484	4.11893	3.99539	3.92104	4.19479	3.72093	3.80979	4.16083	4.08275	4.84392	3.74154	3.75682	5.29184	3.83134	4.07115	3.77745	3.53879	3.59682	3.90425	3.83602	4.19191	3.97206	4.37864	3.68789	3.65802	3.70823	4.09219	3.52595	3.68377	3.60781	3.62372	3.6601	3.6052	3.67736	3.73877	3.58516	3.80997	3.98047	3.83291	3.9042	3.39089
Olfr1487	3.10185	3.20132	3.27059	3.30245	3.24136	3.04028	2.92854	3.09753	3.31078	3.33914	3.16755	3.29349	3.47847	3.63301	4.19572	3.97059	3.63387	4.15079	3.37972	3.89907	4.16154	5.82856	3.22603	2.97766	3.26279	3.5105	3.40544	3.34375	3.22612	3.4254	3.35621	3.63256	3.08846	3.53366	3.92181	3.32073	4.41792	3.93008	3.37959	3.56079
Olfr1489	4.0678	3.62929	3.90649	3.78701	3.79698	3.63897	3.5953	3.93322	3.98161	3.71305	3.54898	4.7709	3.67529	3.9887	4.11307	3.78997	4.19627	3.60936	3.64258	3.91117	3.47133	3.72955	3.65819	3.5283	3.52441	4.45663	3.44629	3.44035	4.0287	3.67562	3.43894	3.53394	3.6771	4.0676	3.81952	3.95021	3.59571	3.54197	3.81235	3.9639
Olfr149	6.26818	6.00349	6.34658	6.19663	6.0756	6.10952	6.17928	6.16531	6.47512	6.60466	6.48137	6.32367	6.42714	6.70312	6.17413	6.54167	6.39735	6.33794	6.17629	6.17428	5.98859	5.83474	6.16891	5.96008	5.96739	6.69124	6.12311	6.53121	6.35559	6.32977	6.10326	6.19753	6.18427	6.69018	6.10583	6.62674	6.53773	6.67314	6.38416	6.23101
Olfr1490	4.75765	4.88583	4.7066	4.87498	4.88294	4.75672	4.79009	4.93412	5.2107	4.68758	4.93921	4.82785	4.97645	4.21997	4.65325	5.16032	4.76226	4.85488	4.99318	5.00957	4.49672	5.07752	4.75945	4.65345	4.53732	5.15919	4.54862	5.0042	4.75155	4.78658	4.81332	4.66541	4.78407	4.83767	4.89252	5.16867	4.93238	4.86059	4.82785	4.64401
Olfr1491	5.25501	5.45506	5.05408	5.23104	5.04532	4.95434	5.17322	4.93302	4.9868	4.86894	5.4724	5.205	4.98126	5.29115	5.1843	5.33414	4.90285	5.23709	4.84937	5.55773	5.23839	5.43939	5.206	4.82397	4.94701	5.4284	4.90493	5.26605	5.28993	5.26144	5.01576	5.25738	5.28488	4.62422	4.88759	5.70885	5.53459	5.66536	5.83451	5.47858
Olfr1494	3.66279	3.31421	3.91709	3.65413	3.39295	3.57178	3.82408	3.4449	3.7726	3.69147	3.99498	4.05296	3.83274	3.482	3.65165	4.43747	3.5301	3.47952	3.48748	4.4056	4.43361	4.42571	3.816	3.66199	3.70167	3.8357	3.47667	3.71532	4.07535	3.67891	3.78067	3.62207	3.4736	3.73181	4.15756	3.67971	3.76736	3.42708	3.94361	4.0602
Olfr1495	5.04697	4.78319	4.94233	5.10704	5.0083	4.96995	4.82068	5.01602	4.98418	4.95944	5.22818	5.49522	4.89821	4.97839	4.58042	5.03104	5.13073	4.98075	4.84323	4.65978	4.82393	5.48392	4.87204	4.84462	4.8015	5.23738	5.12282	5.097	5.13701	5.2749	4.8916	4.80731	4.94553	5.50937	6.04774	5.21084	5.43716	5.56979	5.15036	5.53934
Olfr1496	3.57009	3.35896	3.5423	3.601	3.3059	3.32232	3.35649	3.46416	3.49615	3.40771	3.66033	3.36655	3.62628	3.63278	3.43502	3.52659	3.51041	3.3802	3.0073	3.85471	3.04483	3.57276	3.18456	3.29322	3.24348	3.21472	3.26209	3.25392	3.41283	3.38727	3.25727	3.11653	3.41637	3.29659	3.62803	3.35649	3.26532	3.39758	3.58706	3.3599
Olfr1497	5.93109	6.28917	6.00309	5.92953	5.71535	5.7882	5.77392	5.53503	5.81395	5.71835	5.61695	6.03572	5.7677	5.52467	5.6975	6.11481	6.05603	5.81271	5.88915	6.19669	6.16296	6.60197	5.95565	5.88876	5.69379	5.77177	5.70153	5.70612	6.23043	5.57909	5.67787	5.73342	5.7964	6.21622	6.43853	6.01105	6.10265	6.06281	5.8961	6.10331
Olfr1499	4.08978	4.30257	3.90536	3.81975	4.043	3.75372	4.17767	4.2517	4.31389	4.60498	4.24588	5.14091	3.82747	3.75206	4.14608	4.07022	4.1208	3.82855	4.33711	4.53691	4.05676	3.97626	4.00304	3.95043	3.86391	3.86616	3.98108	3.925	4.02775	4.38676	3.89407	4.08502	3.8248	4.88425	3.75865	3.89932	4.11049	3.73175	4.16808	4.00826
Olfr15	4.28351	4.30691	4.59479	4.22766	4.37693	4.40774	4.57801	4.53976	4.00607	4.19256	4.3369	3.75742	4.17998	4.63648	4.50277	4.52802	4.30691	4.15609	4.11948	4.20312	4.22675	4.1981	4.30691	4.13765	4.03145	4.71351	4.12611	4.30691	4.4276	4.66471	3.91817	4.30691	4.25597	5.61094	4.24493	4.87805	4.41043	4.61668	4.50381	4.28704
Olfr150	4.81844	4.62122	4.81473	5.05826	4.74969	4.6236	4.65224	4.74563	4.65951	5.01111	4.58614	4.7733	4.55962	4.3207	4.92756	4.75397	4.74338	5.15994	4.95295	4.89135	4.56186	5.17473	4.54836	4.28124	4.43564	5.17742	4.92021	4.75795	5.02725	4.80981	4.45791	5.11881	4.7712	4.89944	5.18761	5.08558	5.137	5.06608	4.8078	4.35386
Olfr1500	4.93945	5.0978	4.95658	4.8959	4.90638	5.00291	5.06999	4.77912	5.06393	5.09143	5.04914	4.84103	4.95295	4.57554	5.05014	5.06637	5.32606	4.7068	4.89568	5.21392	4.90412	4.77299	4.73349	4.89053	4.72442	5.0058	4.93304	5.37705	5.0591	4.8086	4.8959	4.90418	4.83678	5.70075	5.44206	5.01262	5.28566	5.23058	4.93357	4.8738
Olfr1501	3.41824	3.42366	3.61603	3.54154	3.42459	3.30302	3.66455	3.42911	4.05646	3.86823	3.57567	4.33973	3.50884	3.55841	3.36274	3.36872	3.98973	4.02822	3.87271	4.62455	4.02249	4.37072	3.4757	3.31848	3.22464	3.8672	3.57517	3.53045	3.7531	3.61736	3.42087	3.79491	3.35753	4.76483	3.85773	3.69253	3.94076	4.05171	3.53393	3.594
Olfr1502	5.22969	5.10445	5.09866	5.20717	5.14022	5.01107	5.79829	5.70219	5.42665	5.96974	5.69463	6.7617	5.08205	5.53614	5.46035	5.30881	5.41399	5.40806	5.2379	5.77086	5.25595	5.97769	5.04535	5.09783	5.01933	5.23067	5.36141	5.15858	5.59264	5.16519	5.16383	5.17378	4.99621	5.36153	5.45764	5.26218	5.15156	5.4855	5.03941	5.25442
Olfr1504	4.15545	3.81473	4.01939	3.97957	3.99554	3.8257	4.47278	4.29496	5.20693	4.60202	4.38294	5.50998	3.87806	3.8424	4.07465	4.27192	4.47158	4.42543	4.03024	4.05815	4.16712	4.54685	3.97874	3.82983	3.8088	4.19568	4.01651	3.90607	3.95632	3.92454	3.63168	4.03907	3.74794	4.70854	4.38434	4.14941	4.07491	4.20119	3.83127	4.11038
Olfr1505	4.35742	4.04022	4.47796	4.04751	4.20432	4.01527	4.83073	4.99189	4.73522	4.75227	4.95539	4.55576	4.87255	4.37797	4.37594	4.9506	4.71773	4.78847	4.63655	4.69606	4.85877	5.16916	4.69857	4.49337	4.18358	4.93165	4.33572	4.39056	4.83396	4.54603	4.6879	4.46262	4.03452	4.18596	4.89849	5.11699	5.06726	5.37985	4.64299	4.74467
Olfr1506	5.35166	5.57937	5.0622	5.38264	5.12112	5.3288	5.19105	5.10363	4.77287	5.01041	4.75843	5.32436	4.98527	4.59193	4.61396	5.12601	4.63398	4.67753	4.88488	5.28556	4.81037	5.3806	4.74681	4.4706	4.52673	5.04448	4.77336	4.89595	4.83443	4.90829	4.97524	4.91002	5.08056	4.70415	5.18876	5.08044	5.22421	5.26444	4.99652	4.79058
Olfr1507	3.96544	3.87563	3.97011	3.63063	3.70229	3.65362	4.50636	4.27744	4.69887	4.13796	4.34129	5.01365	3.70944	3.66395	3.78529	3.78316	3.87751	3.84592	3.43853	3.82257	4.32556	3.91328	3.91186	3.66628	3.47328	3.91753	3.709	3.87988	4.02139	4.17241	3.65873	3.80961	3.73845	4.0255	4.11115	3.86034	4.08204	4.39997	3.99668	3.92782
Olfr1508	5.10442	4.66125	5.12132	4.99802	4.89216	4.48828	4.95267	4.93209	4.67194	5.03889	4.99262	5.68214	4.5834	4.49651	4.87724	4.67111	5.08967	4.9329	4.65315	4.38192	4.65753	4.74753	4.90122	4.63293	4.57157	4.9405	4.89678	4.68994	4.98763	4.59002	4.91043	4.43755	4.51316	4.65277	4.4436	5.20991	5.35811	4.82873	4.90705	5.16856
Olfr1509	4.17002	4.13066	4.10508	4.12097	3.93502	3.96393	4.32393	4.17456	4.14645	4.33572	4.40013	4.69001	3.90204	3.89771	4.10834	4.16157	4.25964	3.72653	4.08022	4.1708	3.72879	4.03125	3.85191	3.73871	3.89551	3.87136	3.93785	4.01834	4.02978	3.83191	3.7669	4.0439	3.89636	4.32139	4.33197	4.34502	4.19691	3.70147	3.90821	3.943
Olfr151	4.18892	4.09065	4.28602	4.10071	3.78955	3.82491	3.73692	3.8104	3.59846	3.67002	3.59332	3.60094	3.80732	3.88065	3.93817	4.27366	3.99637	3.83267	3.75925	3.62388	3.83321	4.08921	3.81819	3.71503	3.92137	4.11543	4.28576	3.74521	4.10875	4.15597	3.8156	4.02429	3.72318	4.10366	4.08944	4.14679	4.31845	4.02105	3.8744	4.29814
Olfr1510	6.07576	6.13159	6.44924	5.98759	6.22421	5.84216	6.44491	6.69329	6.30153	6.69138	6.35569	6.14588	6.34316	5.47502	6.34052	5.60893	5.90098	5.44881	5.92137	5.52063	5.90739	5.5206	5.76927	5.74102	6.02413	7.0576	6.10299	6.4133	5.67098	6.65371	6.03656	6.10602	5.81663	6.38737	6.3393	6.14517	6.69363	6.3815	6.50548	6.88064
Olfr1511	4.83344	4.78601	5.18008	5.03829	4.64923	4.87093	5.44277	5.5212	5.94031	5.03387	5.03196	6.17814	4.94021	4.6372	5.07585	4.67059	4.92328	4.75369	4.53084	5.26259	4.70059	4.66597	4.86818	4.60583	4.70609	5.34407	5.23493	5.35498	4.79636	5.4294	5.41918	5.10529	4.85364	5.73998	5.10431	5.30812	4.97453	5.92572	5.44523	4.88521
Olfr1512	4.40504	4.47135	4.37131	4.33592	4.24068	4.44296	4.16056	4.30863	4.37977	4.27981	4.26899	4.13433	4.60197	4.23008	4.81351	3.99507	4.03869	4.82452	4.36067	5.16818	4.6374	4.59517	4.28781	4.01654	4.13765	4.42303	4.09845	4.37131	4.60359	4.25118	4.0324	4.23028	4.16121	4.93522	4.62216	4.58406	4.18753	4.38765	4.32907	4.51454
Olfr1513	4.40504	4.47135	4.37131	4.33592	4.24068	4.44296	4.16056	4.30863	4.37977	4.27981	4.26899	4.13433	4.60197	4.23008	4.81351	3.99507	4.03869	4.82452	4.36067	5.16818	4.6374	4.59517	4.28781	4.01654	4.13765	4.42303	4.09845	4.37131	4.60359	4.25118	4.0324	4.23028	4.16121	4.93522	4.62216	4.58406	4.18753	4.38765	4.32907	4.51454
Olfr152	3.97874	4.18807	4.52087	4.09919	4.10448	4.20183	4.51561	4.3062	4.30622	4.60636	4.45942	5.77605	4.33702	4.49499	4.51576	4.75128	4.53069	5.30028	4.34177	5.12019	4.94833	4.73163	4.21019	4.10801	4.11189	4.4642	4.30139	3.87623	4.69074	4.22707	4.22297	4.41828	4.03038	5.06953	4.83756	4.25311	4.40008	5.23423	4.72515	4.48429
Olfr153	3.93658	4.02164	4.19327	4.21389	3.95158	3.92728	3.85775	4.2787	4.1926	4.59035	3.89013	5.27702	3.96085	3.89273	3.56879	3.99875	4.5223	4.18022	3.85605	4.38421	4.03139	4.29611	3.61766	3.66297	3.66148	3.90712	3.79639	3.76514	3.98635	3.59145	3.8158	3.84778	3.61858	4.53367	3.99744	4.04697	3.70491	4.4765	3.9865	3.83123
Olfr1532-ps1	6.43191	6.13981	6.11059	6.02817	6.18342	6.04933	6.1886	6.25456	6.21608	6.25162	6.13335	6.17283	5.88098	6.00786	6.00607	6.0102	6.08487	6.20673	6.06289	6.00524	5.58956	5.86898	5.99116	5.78017	5.91984	6.45637	5.84931	6.3181	6.41747	6.25243	5.94769	6.17071	6.11678	6.62236	6.03331	6.61244	6.33982	6.2555	6.5682	6.31561
Olfr1535	5.15345	5.19291	5.31976	5.0331	4.88032	4.92275	5.37427	5.21672	5.09265	5.47694	5.42521	5.23387	5.1258	5.01008	5.06281	5.03309	5.19752	5.45169	5.33395	5.40393	5.40361	5.44555	5.10392	4.86184	5.19012	5.2114	5.53351	5.56962	5.05309	5.51894	5.30085	5.39901	5.10941	4.85191	5.22767	5.28534	5.17619	5.27311	5.16434	5.15774
Olfr1537	4.20818	4.41883	4.26273	4.33814	4.6068	4.23368	4.17459	3.68212	5.00826	3.62103	4.40942	4.33458	3.72731	4.26835	4.07534	3.84044	4.81935	4.28064	4.0979	3.85436	3.65427	3.93232	3.46363	3.81655	4.01554	4.31574	4.54624	4.08231	4.5721	3.92159	3.88372	3.91261	3.96827	3.81336	3.61314	3.95521	3.32788	3.74116	4.03233	3.88648
Olfr154	4.32837	4.25756	4.26478	4.10742	3.83989	4.29833	3.84804	3.66644	3.58533	3.98368	4.11249	4.41512	3.61844	3.65148	3.65715	3.85954	3.79084	3.60019	3.81904	4.10927	3.62056	3.70755	3.79313	3.80526	3.49986	4.08534	3.83433	3.74	3.94562	3.75045	3.81768	3.69404	3.61169	4.04657	4.50449	3.85954	3.99197	4.12435	3.78927	3.71757
Olfr155	5.12662	5.08736	5.23964	5.12109	4.99195	5.05381	5.43615	5.43633	5.20752	5.13068	5.06499	5.35297	5.1694	4.77868	5.02611	5.25015	5.63867	5.19606	5.15454	5.47605	5.47452	5.60789	5.10992	5.04688	5.43264	5.20999	4.84908	5.11291	5.45581	5.26994	5.17534	5.18505	5.00058	5.78851	5.33681	5.50888	5.01539	5.46441	5.49271	5.12487
Olfr156	4.19864	4.06631	4.20856	4.22535	3.99722	3.92374	3.96391	4.50601	4.14302	4.20629	4.20762	4.19574	4.06522	4.18335	4.23116	4.23951	4.52095	3.9191	3.97983	4.32106	4.14809	4.25145	4.18119	4.02002	4.15304	4.42717	4.12729	4.51321	4.13862	4.10328	3.97301	4.26612	4.06261	4.58168	4.2208	4.50426	4.72734	4.48091	4.34773	4.72948
Olfr157	5.63718	5.93132	5.86872	5.74954	5.87725	5.94531	5.9157	5.94589	5.54987	5.9498	5.94589	5.72436	6.13178	5.96741	5.81492	5.84188	6.24663	5.89121	5.83933	6.41455	6.46948	6.43595	5.77482	5.43919	5.60253	6.44288	5.65377	5.51643	5.96987	5.89813	5.81159	5.83807	5.68686	6.28406	5.92802	5.92912	6.25058	6.50693	5.95339	5.85931
Olfr159	4.88041	4.97897	5.00059	5.01737	4.70415	4.65984	4.72871	4.8544	4.79437	4.35615	4.83633	4.75124	5.00692	5.16119	4.52135	4.6954	5.04662	4.9935	4.36329	4.49014	4.62001	5.17801	4.85148	4.74867	4.84926	4.9446	4.54869	4.84533	5.013	4.88955	4.76526	4.80338	4.80338	5.05745	4.92199	4.93575	4.96908	4.70097	4.89177	4.67274
Olfr16	5.19607	4.94375	5.10397	4.90417	4.93242	4.78912	5.02843	5.00913	5.06389	4.98543	4.88577	5.0303	5.21947	5.10391	5.12423	4.77763	5.18246	5.03614	5.25752	4.77196	4.99693	5.63142	5.01114	4.84542	4.92557	5.07571	4.77342	5.14425	5.05273	5.02843	4.96956	5.09832	4.90692	5.27505	5.17132	5.42734	4.94057	4.89017	4.93481	4.95633
Olfr160	4.77582	4.82186	4.71094	4.85301	4.87975	4.66345	4.44545	4.63268	4.5654	4.71628	4.4352	4.70721	4.3352	4.89856	5.23545	4.91918	4.65932	4.97381	5.0773	5.14093	5.307	5.05194	4.64513	4.76844	4.6368	5.05355	4.54623	4.93123	4.89901	4.69617	4.55978	4.66418	4.71714	4.95895	4.83086	4.51298	5.19047	4.80222	4.7396	4.3041
Olfr161	5.09795	5.01366	4.90481	5.07342	4.77111	4.76297	5.13321	5.64946	5.47897	5.39465	5.67639	5.9291	5.23939	5.87096	5.35859	5.44569	5.37744	5.35528	5.50964	5.66621	4.79875	5.35819	5.03541	4.86856	5.13158	5.17669	5.24397	5.29858	5.44116	5.44784	5.16844	5.14604	5.22399	5.22529	5.15911	5.56422	5.25716	5.2356	5.27301	5.4314
Olfr164	4.40784	4.16923	4.17745	4.19857	4.06987	4.11394	4.39644	4.06955	4.59394	4.44745	4.22289	4.35793	4.12626	4.19159	4.14206	4.29076	3.89752	4.0391	4.02728	4.0517	4.54392	4.21806	3.88231	3.77152	3.94093	4.3029	3.73576	4.08934	4.39732	4.30454	4.19758	4.21308	3.9633	4.03589	4.5851	3.86971	4.55467	4.40434	4.25472	4.60679
Olfr165	4.63408	4.55431	4.89631	4.44471	4.47967	4.43787	4.69918	4.62307	4.55615	4.55642	4.93216	5.20753	4.59125	4.81906	4.38375	4.45314	4.67565	4.6447	4.37045	4.66962	4.65132	5.03512	4.2982	3.9909	4.21568	4.47897	4.30794	4.36459	4.67338	4.36356	4.40056	4.44908	4.38915	5.19336	4.66596	4.49266	4.94009	5.28016	4.45715	4.74547
Olfr166	5.38132	5.34752	5.0445	5.27043	5.11665	5.01601	4.42476	4.47749	5.09114	5.01778	4.66111	5.5897	4.89695	4.94314	5.0518	3.97445	4.9158	5.06197	4.84751	6.19612	5.80967	6.30278	4.74946	4.98888	4.6818	5.1634	4.4991	4.68416	4.48896	4.48013	4.3783	4.28791	4.27743	5.15492	4.78144	4.30858	4.31588	4.85002	4.07024	4.8821
Olfr167	4.25659	4.12494	4.08924	4.19585	4.11622	3.71889	5.01628	4.72496	5.26742	4.13094	4.55564	5.96342	4.0246	4.10442	3.61285	4.51866	4.1993	4.09889	4.13094	4.31425	4.13094	4.21086	3.86922	3.69083	3.83922	4.30848	4.13154	3.79484	4.08274	3.79895	4.00066	4.1357	3.91069	3.48665	4.15439	4.0933	4.14482	4.48881	4.01076	4.35599
Olfr168	4.11962	4.09185	4.14616	4.00833	4.14529	3.96584	4.27574	4.3804	4.60828	4.39383	4.51965	5.22995	3.94707	4.24721	4.16067	4.28944	3.69154	4.40994	3.99124	4.4458	4.18838	4.88119	3.86976	3.83407	3.87189	4.21951	3.99575	4.16102	4.13308	4.26854	3.82269	4.3741	4.02251	4.87978	4.12767	3.8834	4.13257	4.56856	4.0585	4.26083
Olfr169	5.80659	5.8585	5.78361	5.66704	5.70653	5.57624	5.67887	5.92512	6.10405	6.13022	5.79037	6.30981	5.39776	5.33025	5.13487	5.42914	5.23127	5.63098	5.43518	6.10712	5.42684	5.68382	5.3603	5.22528	5.47055	5.84448	5.57624	5.49432	5.8083	5.76674	5.22902	5.08748	5.24557	5.97846	5.59468	5.59034	5.58411	6.29775	6.17479	5.57624
Olfr17	4.75304	4.6567	5.06409	4.69359	4.72262	4.75079	4.45439	4.52239	4.66405	4.36985	4.78274	4.25233	4.70966	4.43777	4.54271	4.99318	4.57561	4.6847	4.99312	4.64711	4.99683	5.4709	4.71595	4.31531	4.47426	4.98438	4.34688	4.80566	4.77169	5.04134	4.43983	4.66818	4.57696	5.30935	5.20389	5.01267	5.10787	5.01321	4.81437	4.6278
Olfr170	5.80659	5.8585	5.78361	5.66704	5.70653	5.57624	5.67887	5.92512	6.10405	6.13022	5.79037	6.30981	5.39776	5.33025	5.13487	5.42914	5.23127	5.63098	5.43518	6.10712	5.42684	5.68382	5.3603	5.22528	5.47055	5.84448	5.57624	5.49432	5.8083	5.76674	5.22902	5.08748	5.24557	5.97846	5.59468	5.59034	5.58411	6.29775	6.17479	5.57624
Olfr171	5.80659	5.8585	5.78361	5.66704	5.70653	5.57624	5.67887	5.92512	6.10405	6.13022	5.79037	6.30981	5.39776	5.33025	5.13487	5.42914	5.23127	5.63098	5.43518	6.10712	5.42684	5.68382	5.3603	5.22528	5.47055	5.84448	5.57624	5.49432	5.8083	5.76674	5.22902	5.08748	5.24557	5.97846	5.59468	5.59034	5.58411	6.29775	6.17479	5.57624
Olfr172	4.89286	4.62343	4.52632	3.97652	4.20298	3.86974	4.35749	4.46401	4.62611	4.21872	5.0432	5.52991	3.82982	3.6713	4.00217	3.89362	4.02711	3.63096	5.17969	4.44175	4.12635	3.94922	4.01899	3.89724	4.21724	4.83182	3.82636	4.91222	4.92736	4.99532	4.30771	4.95806	4.72581	4.53008	4.76136	4.32997	4.50059	4.15842	4.34129	4.35932
Olfr173	3.6787	3.61598	3.60367	3.59011	3.4123	3.51027	3.39507	3.57578	3.53744	3.73484	3.49553	4.3805	3.52131	3.71109	3.71846	3.6787	3.89555	4.00731	3.77213	3.41163	3.44462	3.99094	3.40751	3.47549	3.28351	3.88845	3.34077	3.60237	3.71849	3.96867	3.83745	3.92644	3.73553	4.47875	3.66208	3.59307	3.74963	3.37247	3.49951	3.36506
Olfr175-ps1	2.97662	3.04174	3.05047	2.88577	3.0102	2.93143	3.08579	3.34129	3.14077	3.27328	2.92485	4.08758	3.18832	3.32091	3.72576	3.77285	3.49062	3.36957	3.52626	3.87346	3.09839	3.96163	2.94092	2.94258	2.87639	2.98491	2.97338	3.01991	3.28871	3.03807	2.98271	3.05807	2.97664	3.49991	3.30615	3.00471	3.13375	3.22369	2.97244	3.13778
Olfr176	3.14285	3.40736	3.33271	3.13972	3.00514	3.1193	3.06768	2.98691	3.12571	3.33022	3.04367	3.56837	3.11817	3.58262	3.27139	3.33271	3.29789	3.39542	3.33271	3.46213	3.52998	3.74913	3.06546	3.30047	3.07638	3.28764	3.25037	3.12306	3.6876	3.3061	3.24108	3.30856	3.34571	3.81966	3.42866	3.31534	3.46711	3.85605	3.19626	3.34897
Olfr177	3.14285	3.40736	3.33271	3.13972	3.00514	3.1193	3.06768	2.98691	3.12571	3.33022	3.04367	3.56837	3.11817	3.58262	3.27139	3.33271	3.29789	3.39542	3.33271	3.46213	3.52998	3.74913	3.06546	3.30047	3.07638	3.28764	3.25037	3.12306	3.6876	3.3061	3.24108	3.30856	3.34571	3.81966	3.42866	3.31534	3.46711	3.85605	3.19626	3.34897
Olfr178	2.94929	3.11835	3.01055	2.91012	2.94151	2.83152	3.58972	3.06129	3.50111	3.43693	3.90656	3.2971	3.21288	3.18116	3.4139	3.92473	3.73624	3.61103	4.06532	4.10678	4.04792	3.68357	2.93902	2.8435	3.00983	3.22025	3.49464	2.85751	3.24068	2.82074	3.2856	3.23539	2.86658	3.55765	3.96799	3.1508	3.43577	2.72418	2.97358	3.08718
Olfr18	4.14217	3.78971	3.72055	3.6752	3.7002	3.76534	3.96936	3.77861	3.62419	3.65444	3.73816	3.73895	3.82558	3.61259	3.71432	3.48244	3.54477	3.71102	3.59204	3.94658	3.72169	4.01367	3.75557	3.45717	3.51743	3.7944	3.60809	3.70405	3.59563	3.67572	3.75557	3.31408	3.59576	4.30279	4.02757	3.85797	3.87891	4.05479	3.68108	3.6948
Olfr180	4.8674	4.70489	4.97596	4.5758	4.84278	4.7072	4.4615	4.54587	4.38031	4.36512	4.36782	4.10907	4.51105	5.21353	4.68501	5.00942	4.599	4.70985	4.8657	5.21991	4.43364	4.92221	4.78247	4.45246	4.62831	4.95044	4.71585	4.47283	5.12169	4.76016	4.79273	4.81066	4.29608	4.16914	5.14158	4.92591	5.67241	4.36482	4.67741	4.7892
Olfr181	3.20624	2.9356	3.04232	3.12321	3.07036	2.94844	3.26216	3.05174	3.10045	3.05034	3.23227	3.38821	3.13164	3.48284	3.7076	3.79	3.01596	3.30753	3.31206	4.11473	3.28382	3.93753	3.01359	2.95319	3.12147	3.00311	3.12404	3.17419	3.18718	3.14759	3.01105	3.24962	2.9079	3.52509	3.56753	2.94804	3.29574	2.86898	3.02498	3.01099
Olfr183	3.28137	3.20032	3.15001	3.16701	3.26045	3.19359	3.26677	3.2846	3.33121	3.9145	3.28796	3.45935	3.23573	3.41771	3.54138	3.25645	3.63543	3.53798	3.56104	3.9468	3.16921	3.96669	3.16894	3.56361	3.27926	3.44775	3.43073	3.60298	3.83755	3.53448	3.36478	3.49657	3.19555	4.03488	3.37718	3.27993	3.59445	3.85111	3.44479	3.64692
Olfr186	3.61643	3.66588	3.7683	3.6535	3.47567	3.42652	3.55297	3.93278	3.78017	3.7431	3.61575	4.8383	3.73699	3.33321	3.62199	3.41107	3.52993	3.78638	3.71447	3.56013	3.60166	3.88376	3.32397	3.32377	3.42278	3.49555	3.45806	3.5837	3.91797	3.88243	3.47065	3.71802	3.39684	4.25913	4.01883	3.54105	3.76314	3.67987	3.64222	3.97965
Olfr187	3.35247	3.21241	3.4879	3.2536	3.34032	3.11092	3.49072	3.64545	3.60659	3.26428	3.48432	4.24945	3.47904	3.89767	3.48672	3.60229	3.05193	3.81606	3.76661	3.71028	3.65218	3.79816	3.64342	3.52813	3.55247	3.38067	3.03142	3.55247	3.88564	3.92689	3.49209	3.56956	3.44567	3.9119	3.27832	3.67531	3.77374	3.2408	3.7418	3.86737
Olfr19	4.91659	5.1222	5.0614	4.85292	4.62677	4.72097	4.62476	4.7571	4.87844	4.55895	4.90419	4.82103	4.95836	4.88265	5.11897	4.86863	4.95708	4.83431	4.90987	5.12829	4.31081	5.45304	4.85286	4.71533	4.77782	5.22045	4.86637	4.97232	4.72803	5.05341	4.68262	4.97427	4.84464	4.6865	4.55383	4.82225	4.74373	4.78468	5.33097	4.76848
Olfr190	3.09773	2.99074	2.79912	2.99292	2.94835	2.94004	3.00192	3.02319	2.96221	3.10719	3.10826	2.92791	2.87413	2.9209	2.78579	3.3377	3.13827	3.071	2.94428	3.10916	3.10189	3.62901	2.92968	2.8629	2.9389	3.39881	2.95634	2.91988	3.4321	3.12371	2.92908	2.99238	2.87331	3.37915	4.05847	2.77056	3.07636	3.20535	2.81465	3.18611
Olfr191	3.47435	3.53909	3.49568	3.54354	3.54914	3.40095	3.47569	3.64859	4.07324	4.05417	3.50961	4.23288	3.4532	3.62277	3.30881	3.46721	3.47667	4.36379	3.69166	3.27013	3.7054	3.82075	3.20001	3.25075	3.15914	3.54135	3.15618	3.2268	3.3348	3.50883	3.33724	3.19247	3.20877	3.35475	3.60364	3.05908	3.27073	3.46589	3.14311	3.23208
Olfr192	2.98317	2.94786	3.05337	3.25477	2.92312	3.01067	2.75814	3.03566	2.83648	2.89387	3.35116	3.94308	2.95042	2.88549	2.92581	3.28544	2.80628	2.98897	3.11038	3.42464	3.02212	3.85085	2.67304	2.76439	2.70816	2.88305	2.77299	2.87558	3.20838	3.20247	2.86322	3.12996	2.75185	3.13866	2.94603	2.64945	2.97947	3.3618	2.80996	3.10434
Olfr193	2.90694	3.03178	3.09323	2.73696	2.92316	2.88497	3.20035	3.02127	2.84363	2.8197	2.89491	3.00442	3.03517	3.38337	3.06346	3.02738	3.54863	3.36291	3.38918	3.66573	3.20379	3.90901	2.69256	2.7944	2.76713	2.79843	2.9802	2.89957	2.95042	2.89247	2.98113	2.81159	2.72318	3.57975	2.76152	2.87252	2.56291	3.11596	2.87364	3.00776
Olfr194	4.0003	3.8292	3.58326	3.86944	3.71423	3.73122	3.43417	3.61914	3.76869	3.62634	3.54426	3.4994	3.58905	3.60509	3.5898	3.81539	3.98738	3.63063	3.52006	3.6455	3.70105	4.28062	3.42108	3.48104	3.19334	3.64794	3.46436	3.45099	3.79253	3.65026	3.41485	3.42304	3.31804	4.39072	3.76208	3.45282	3.51663	4.02434	3.65495	3.47418
Olfr195	3.66542	3.54522	3.44697	3.69874	3.64725	3.52462	3.76994	4.18694	4.03877	3.69048	3.37722	4.24975	3.78692	3.74633	4.0325	4.08477	3.72539	3.86411	3.5643	4.04354	4.02299	4.71812	3.60966	3.69231	3.30149	3.44892	3.76844	3.70706	4.12144	3.76636	3.66107	3.73929	3.7129	4.42975	4.28478	4.08012	3.68679	3.73486	3.65304	3.56748
Olfr196	2.8037	2.72343	2.7804	2.75883	2.66402	2.64685	2.92387	3.13917	3.04027	3.09261	3.02227	3.57605	3.00859	2.89882	2.87689	3.46721	2.91822	3.23575	3.30025	3.43862	2.90104	3.22584	2.66244	2.64421	2.60186	2.9084	2.58665	2.84788	2.94285	2.85443	2.79903	2.93674	2.67567	2.98464	2.89824	2.67121	2.95358	2.97975	2.80041	2.84685
Olfr197	5.03795	4.7299	4.94716	4.76241	4.44279	4.39173	4.36924	4.51197	4.62591	4.43352	4.35955	4.55911	4.09034	4.60458	4.75565	4.87283	4.76116	4.96958	4.68767	4.32372	4.72682	4.69462	4.51509	4.27733	4.65678	4.66924	4.42516	4.20768	4.62134	4.48872	4.15178	4.33201	4.3933	5.65657	4.99657	4.6469	5.11309	4.46503	4.17995	4.27767
Olfr198	4.40845	4.13706	4.15604	4.00923	4.3223	4.10122	4.91259	5.19545	4.96649	4.20857	4.24725	5.83408	4.08317	4.34905	3.78013	4.23895	3.58617	4.80001	3.98335	5.30903	4.3917	5.74284	3.95723	3.79418	3.71926	3.98497	3.97169	3.76003	4.4777	4.3208	4.1263	4.14212	3.93363	3.96017	4.87464	4.11424	4.3811	4.19449	4.53216	4.49939
Olfr199	3.50337	3.59276	3.40651	3.47037	3.41465	3.48062	3.27789	3.58128	3.56062	3.6177	3.45043	3.86011	3.2898	3.62545	3.44816	3.55847	3.49258	4.03884	3.53847	3.89351	3.6263	3.68998	3.38759	3.32983	3.20348	3.33995	3.42431	3.24649	3.40763	3.3793	3.27468	3.37945	3.22797	3.35156	3.62522	3.42838	3.58258	3.39937	3.31685	3.37671
Olfr2	3.81048	3.79124	3.89899	4.11088	3.78992	3.77011	3.81048	3.74172	3.71248	3.66869	3.67279	4.02017	3.44794	3.89582	3.81048	3.56494	3.98081	4.17921	3.79745	4.12555	3.70176	3.81048	3.59106	3.49002	3.60501	3.81048	3.25459	3.57804	4.11577	3.83679	3.62438	3.83089	3.69787	4.06416	4.40561	4.08811	4.16311	3.87062	3.55711	3.93612
Olfr20	4.76067	5.00819	4.59393	4.80241	4.64574	4.5982	4.58808	4.35161	4.50844	4.57452	4.50842	4.35783	4.58509	4.30375	4.58238	4.92837	4.52343	4.76575	4.96663	4.80164	4.43737	4.56841	4.23302	4.49658	4.15412	4.5879	4.46594	4.52597	4.45122	4.65019	4.53176	4.59914	4.33165	4.46324	4.39806	4.53885	4.7618	4.9456	4.50945	4.588
Olfr201	3.61748	3.48874	3.60419	3.48219	3.71992	3.64177	3.32134	3.96927	3.77331	3.70696	3.50752	4.77793	3.90968	3.71395	3.88672	4.23569	4.23043	4.16177	3.87688	3.79966	3.84314	4.36863	3.55149	3.46689	3.39921	3.73216	3.07667	3.71535	3.88606	3.71868	3.72643	3.46223	3.45296	3.79251	3.56313	3.69888	3.44926	3.7035	3.69395	3.64278
Olfr202	4.43823	4.3239	4.36802	4.35063	4.25935	4.082	4.28328	4.30091	4.06836	4.09205	4.05699	4.26039	3.9541	4.33725	4.12308	4.00568	4.25544	4.10306	4.29378	4.29999	4.1821	4.19344	4.08455	4.02631	4.1186	4.68173	4.26309	4.17309	4.1539	4.21368	4.20807	4.26453	4.37587	5.32088	4.826	4.68796	4.39756	4.6133	4.12211	4.48698
Olfr203	3.03706	3.16941	2.94285	2.72564	2.79985	2.78267	2.69431	2.77846	2.74847	2.66485	2.71232	2.92998	2.97912	3.58997	4.07465	3.22541	3.24515	3.98962	2.99506	3.26655	3.25861	3.461	2.83195	2.64822	2.74043	2.89367	2.82258	2.73324	2.87951	3.23813	2.70716	2.80973	2.94285	3.58278	3.1208	3.31741	3.20582	3.15796	2.77205	3.15444
Olfr204	3.91462	3.82298	3.73145	3.81236	3.77067	3.769	3.64693	3.86919	3.78953	3.8365	3.61538	3.98943	3.69643	3.54172	3.63389	4.01531	3.73075	4.07643	3.88925	4.01629	3.78781	3.80999	3.61574	3.55098	3.6089	4.24046	3.6187	3.67528	3.90168	3.78813	3.68884	3.70229	3.63544	3.97865	3.89791	3.56715	3.95741	4.52792	3.7311	4.16721
Olfr205	3.91462	3.82298	3.73145	3.81236	3.77067	3.769	3.64693	3.86919	3.78953	3.8365	3.61538	3.98943	3.69643	3.54172	3.63389	4.01531	3.73075	4.07643	3.88925	4.01629	3.78781	3.80999	3.61574	3.55098	3.6089	4.24046	3.6187	3.67528	3.90168	3.78813	3.68884	3.70229	3.63544	3.97865	3.89791	3.56715	3.95741	4.52792	3.7311	4.16721
Olfr206	3.12631	3.11175	2.93999	3.10941	2.99662	2.94885	2.96288	3.02617	3.01551	3.37545	3.14648	3.53031	3.25411	3.84806	3.75451	3.83777	3.1679	3.66843	3.53642	3.75948	3.52065	4.27603	3.10437	2.92254	2.96129	3.08815	3.30542	3.2465	3.61175	2.95917	3.25734	3.16141	3.1415	3.58879	3.91311	2.9781	3.27822	3.3359	3.09334	3.1835
Olfr207	4.27981	3.80254	4.16702	4.06257	3.82854	3.86767	3.97637	3.89886	3.36378	3.59068	3.63443	3.6136	3.96308	4.19362	4.19427	3.93227	3.70226	4.07926	3.9574	4.1354	4.14248	4.53198	3.84282	3.93312	3.93162	4.13113	3.92446	3.89339	3.65073	3.64491	3.49951	3.79437	3.5655	4.26217	4.33194	3.86456	4.04158	4.14114	4.05234	3.94399
Olfr208	4.27981	3.80254	4.16702	4.06257	3.82854	3.86767	3.97637	3.89886	3.36378	3.59068	3.63443	3.6136	3.96308	4.19362	4.19427	3.93227	3.70226	4.07926	3.9574	4.1354	4.14248	4.53198	3.84282	3.93312	3.93162	4.13113	3.92446	3.89339	3.65073	3.64491	3.49951	3.79437	3.5655	4.26217	4.33194	3.86456	4.04158	4.14114	4.05234	3.94399
Olfr209	4.27981	3.80254	4.16702	4.06257	3.82854	3.86767	3.97637	3.89886	3.36378	3.59068	3.63443	3.6136	3.96308	4.19362	4.19427	3.93227	3.70226	4.07926	3.9574	4.1354	4.14248	4.53198	3.84282	3.93312	3.93162	4.13113	3.92446	3.89339	3.65073	3.64491	3.49951	3.79437	3.5655	4.26217	4.33194	3.86456	4.04158	4.14114	4.05234	3.94399
Olfr211	5.07709	4.84453	5.00736	4.92438	4.84389	4.79877	5.19034	4.99189	4.9729	4.99529	5.08866	4.93996	4.95502	5.33789	5.22331	5.12006	4.86455	5.43941	5.00999	5.29098	4.83197	4.9199	4.93058	4.87088	4.95101	5.43892	4.89125	4.97658	5.17721	5.26521	4.98859	4.92693	4.89047	4.94077	5.15583	5.11155	5.66206	5.48309	5.18701	4.77986
Olfr212	4.61644	4.29257	4.40093	4.27857	4.2941	4.40309	4.96487	4.96111	5.22952	5.05381	5.01815	5.97115	4.37549	4.73854	4.57151	4.48955	4.24574	4.53505	4.53464	4.44425	4.5896	4.16697	4.6615	4.52661	4.54977	4.8406	4.3973	4.66282	5.13562	4.94497	4.55608	4.48369	4.44649	4.66548	4.51548	4.53363	5.22223	4.98759	4.658	4.96532
Olfr213	5.20718	4.91461	4.99043	4.96111	5.13275	4.94097	5.15225	4.89684	4.73313	5.4178	4.98361	5.01272	4.93497	5.06252	4.68433	5.26772	4.98606	4.98606	5.38745	4.72533	4.56466	5.15442	5.03535	5.09989	5.11826	5.35973	5.5144	4.81153	5.06456	5.2798	4.72704	4.89253	5.0775	4.71714	5.45814	5.00927	4.98518	5.13322	5.18736	5.46654
Olfr214	5.59736	5.86587	5.65939	5.45467	5.30928	5.34702	5.51818	5.62699	5.37971	5.29083	5.32862	5.72034	5.1929	5.45467	5.5904	5.51416	5.57609	5.62734	5.13953	5.23804	5.37928	4.89166	5.17539	5.35265	5.45467	6.09112	5.02327	5.5869	5.51377	5.46916	5.40501	5.24188	5.36271	5.58357	5.25279	5.66544	5.74776	5.49224	5.45467	5.68251
Olfr215	5.36598	5.25958	5.29512	5.51686	5.12708	5.2515	5.27265	5.46387	4.91198	4.89638	5.3577	5.41096	5.45546	5.49321	4.68058	5.17687	5.03713	5.18217	5.25958	5.0315	5.31947	5.50753	5.12436	5.14134	5.04806	5.22403	5.25366	4.79491	5.51826	5.5377	4.82747	5.17082	5.16632	5.93767	5.68283	5.00071	5.5674	5.92172	5.20093	5.56663
Olfr218	4.13534	3.98983	3.90232	3.84213	3.89057	3.91402	4.06489	4.15649	3.98983	4.03024	3.84386	4.10666	4.03108	3.90355	4.35564	3.87928	3.95474	3.91802	4.44328	4.275	4.20753	4.28741	3.79004	3.81697	3.99325	4.3325	3.77245	3.71843	3.96925	4.18887	3.91069	3.67248	3.90418	3.4168	3.88024	4.088	4.20377	3.96135	4.03721	3.9693
Olfr220	5.30265	5.05776	5.42391	5.08331	5.35652	4.85883	5.15558	5.27979	5.54427	5.26455	5.51512	5.33305	4.88942	5.22916	5.2534	5.49352	5.15222	4.81137	5.59562	4.98448	5.22	5.53089	5.11515	5.32338	5.22554	5.34611	5.00465	5.22916	5.20959	5.23927	5.31158	5.32784	5.18502	5.21769	4.84585	5.23671	5.03901	5.28186	5.27621	5.16835
Olfr221	5.47808	5.59969	5.42656	5.46568	5.27971	5.14744	5.31355	5.17666	5.42202	5.19686	5.32519	5.64376	5.34321	5.24249	5.20629	5.21447	5.78579	5.59187	5.37326	5.4645	5.39141	5.69312	5.5702	4.97424	5.32465	5.48771	5.50577	5.43314	5.68919	5.47677	5.60565	5.47706	5.47808	5.72196	6.13187	5.53291	5.54048	5.86722	5.49009	5.58813
Olfr222	6.35395	6.28313	6.07869	5.87103	5.92243	5.98557	5.62821	5.75556	5.81745	5.64538	5.9432	5.68147	5.89924	5.6855	5.6928	5.64504	5.97541	5.9283	5.75381	6.61665	5.37347	5.84137	5.99867	5.99012	5.8512	6.2705	5.84128	6.29262	6.13712	6.50084	5.66877	6.07882	5.86654	6.23558	6.40685	6.35998	6.12045	6.45752	6.34406	6.9438
Olfr223	4.80933	4.83357	4.58972	4.56638	4.67896	4.38948	4.81891	5.04604	4.9558	4.96937	5.10075	5.03031	4.87346	4.5059	4.54177	4.27408	4.33413	5.01266	5.10012	4.62557	4.37277	4.71561	4.43767	4.4684	4.52896	5.09091	4.25721	4.72607	5.13566	4.62603	4.79239	4.59764	4.48707	5.32571	5.5374	4.84738	4.91404	4.97666	5.14389	4.73607
Olfr224	3.78746	3.7957	3.20566	3.21472	3.48779	3.6294	3.10736	3.45713	3.53985	3.38403	3.46103	3.55072	2.98053	3.40029	3.45041	3.00035	3.78067	3.37857	3.50964	3.17997	3.32262	3.68319	3.30777	3.18218	3.22462	3.46018	2.98153	3.08331	3.29131	3.79659	3.01716	3.39411	3.17713	4.07935	3.12789	3.41048	3.39411	3.08599	2.87538	3.53996
Olfr225	5.62316	5.85889	5.75961	5.43382	5.4099	5.30821	5.25219	5.16412	5.11412	5.2061	5.30018	4.99813	5.59977	4.95122	5.64217	5.43382	5.4648	5.07413	5.13384	5.25665	5.43382	5.23272	5.49843	5.49955	5.49415	5.86118	5.38747	5.47921	5.40715	5.76189	5.31642	5.31408	5.26087	5.1979	5.19844	5.7441	5.61892	5.39303	5.65183	5.79322
Olfr228	3.16063	3.36052	3.35442	3.34646	3.26264	3.10753	3.21493	3.06359	3.0843	3.16178	3.31867	3.18485	3.06116	3.20607	3.34671	3.39881	3.20882	3.01818	3.38167	3.60335	3.48792	3.45602	3.08669	3.24911	3.11923	3.3002	3.54351	3.14447	3.44004	3.54145	3.5076	3.0425	3.05075	4.37918	3.60364	3.26667	3.32334	3.38096	2.96191	3.20899
Olfr229	3.15276	2.90975	3.11845	3.00053	3.08485	3.23922	3.11942	3.00661	3.12114	3.17017	2.95972	3.61814	3.3089	3.17385	2.96046	3.7333	3.56738	3.77241	2.80972	3.61572	2.94588	3.26425	3.08873	3.33333	3.30015	3.33782	3.16002	3.26581	3.08315	3.29834	3.15816	3.29449	3.20373	3.76201	2.84768	3.27704	2.78451	3.01573	3.45319	2.93447
Olfr23	4.51093	4.53173	4.41454	4.54721	4.34551	4.41465	4.44341	4.78629	4.40876	4.34769	4.28964	4.35072	4.41334	4.40598	4.82292	4.57362	4.71883	4.43468	4.42437	5.27333	4.36778	4.56357	4.56982	4.41211	4.75769	4.7575	4.55752	4.6034	4.39866	4.35671	4.1091	4.46039	4.3386	4.83711	4.45539	4.63334	4.84396	4.8732	4.51093	4.45483
Olfr231	5.39482	5.51455	5.4933	5.25796	5.38669	5.33947	5.69246	5.29807	5.79356	5.37915	5.32376	5.37664	5.36254	5.52954	5.06223	5.39482	5.66837	5.55986	5.1793	5.78573	5.61327	5.36563	5.39482	5.06239	5.28634	6.08124	5.2255	5.22444	5.16818	5.2271	5.32571	5.46436	5.18065	5.82818	5.28348	5.83159	5.27678	5.65133	5.57626	5.07484
Olfr235	4.57524	4.36303	4.23473	4.24239	4.33051	4.2509	4.51821	4.51137	4.56245	3.99502	4.22727	4.693	4.53261	3.98811	4.60109	4.21066	4.36287	4.49715	4.36305	3.86464	4.23987	3.9278	3.81498	3.92116	3.83753	4.3449	4.05588	4.38613	4.43666	4.52633	4.12972	4.3465	4.19061	4.31833	4.50455	4.14986	4.13643	3.80271	4.07385	4.13301
Olfr237-ps1	4.09395	3.92236	4.37605	4.15722	3.96313	3.7598	3.62566	3.68019	4.08303	3.87399	4.10265	4.42134	3.41684	3.76401	4.2724	3.99194	3.67209	3.86501	3.84017	4.49943	4.02568	4.3828	3.72808	3.80835	3.73121	4.02043	4.4874	3.79653	3.82109	3.76494	3.99435	3.71981	3.78823	3.81951	4.40969	4.06595	3.79955	4.14837	4.66198	4.04871
Olfr239	7.54785	7.77398	8.11761	7.69405	7.6369	7.61088	8.11266	8.28709	8.53649	8.59734	8.48689	8.90535	7.19531	6.94137	7.32688	7.47172	7.00656	7.13514	7.33322	7.27925	7.621	7.25428	7.9117	7.36171	7.56173	8.04672	8.1066	8.23671	7.59382	7.87465	7.85333	8.20715	7.82844	8.7247	8.20249	8.16865	8.07647	8.37281	8.34318	7.94488
Olfr24	4.54937	4.77547	4.86888	4.51956	4.81481	4.54132	4.57206	4.36626	4.50573	4.67346	4.69696	4.57785	4.49059	4.56356	4.45817	4.57426	4.21397	4.66634	4.53941	4.82019	5.30318	5.29132	4.59981	4.62288	4.5799	5.31666	4.61128	4.54035	4.76427	4.73101	4.70583	4.66468	4.6426	5.39126	4.78414	4.62815	5.14061	4.82256	4.58776	4.68104
Olfr242	3.69452	3.61487	3.60848	3.6719	3.49194	3.66129	3.53352	3.56274	3.57275	3.55246	3.55541	3.60436	3.54154	3.58692	3.7016	4.12684	3.83529	3.72789	3.60021	4.24205	3.83242	3.94503	3.51882	3.31766	3.327	3.60349	3.59551	3.5648	3.92318	3.90664	3.49863	3.59307	3.48316	3.77518	3.77965	3.52529	3.64465	3.98717	3.64529	3.70915
Olfr243	2.7508	3.0851	2.94969	3.20989	3.1637	3.22296	2.82834	2.79279	2.95734	2.93762	2.86351	2.85461	3.03606	2.95888	3.61233	3.30029	3.1157	3.18527	3.54281	3.94053	4.11711	3.31795	2.91958	2.95573	2.86015	3.05719	2.76581	3.10225	2.74446	3.1487	2.96005	2.75704	2.70817	3.70273	2.96634	3.62251	3.13606	2.96588	2.81632	3.27295
Olfr247	5.69493	5.67123	5.58799	5.47757	5.53389	5.33861	5.72835	6.278	6.27675	6.38948	5.84675	6.30976	5.36485	5.61593	5.07586	5.29652	5.42966	5.47731	5.37211	5.35684	5.30511	5.4539	5.12043	4.91428	4.9582	5.69211	5.09894	4.99959	5.35684	5.2497	5.05104	5.38733	5.03178	5.41028	5.27804	5.69845	5.6161	5.64884	5.27146	5.26685
Olfr248	4.21563	4.11174	4.01292	3.97912	3.86124	4.09079	5.1004	4.33479	4.45496	4.94932	4.23726	4.81729	3.86998	3.90396	3.8222	4.23464	4.6531	3.97585	3.75779	4.98026	4.07989	4.38699	3.89503	3.61216	3.62717	3.85234	3.79818	3.84396	3.90801	3.53884	3.79969	3.58263	3.9017	4.54902	3.49819	4.1174	4.09723	4.33409	3.87911	3.80485
Olfr25	4.02657	4.25278	4.11186	3.80927	3.80565	3.80927	4.02436	3.98456	3.98604	3.80927	3.80927	3.97397	3.93063	3.73187	3.5073	4.06185	3.69279	3.85679	3.79376	3.91032	3.96741	3.90272	3.52456	3.5345	3.57941	3.98115	3.64058	3.81471	3.80927	3.6776	3.76804	3.57127	3.60725	4.60296	3.9547	3.72518	3.83338	3.99967	4.25228	4.00321
Olfr250	4.32653	4.23595	4.16702	4.21935	4.05343	3.85738	4.12987	4.19347	4.32065	4.41508	4.1178	5.1608	4.43761	3.98681	3.81801	4.4518	4.19144	4.40641	4.30102	4.18393	4.17295	3.98154	3.92421	4.01263	4.01823	4.2345	4.28338	4.29224	4.62493	4.12951	4.17263	4.15521	4.11796	4.12285	4.24041	4.64483	4.19087	4.04652	4.43544	4.275
Olfr251	4.48033	4.08531	4.20136	4.14733	4.06901	3.94299	4.10685	4.35037	4.06191	4.28116	4.45437	4.24093	4.08334	4.16782	3.92186	4.31267	4.41196	4.03485	4.25127	4.48093	4.21466	4.80799	4.14388	3.93099	3.97354	4.27299	4.0987	4.39056	3.95573	4.37327	4.00843	4.22261	3.98181	4.16705	3.87555	4.2736	4.37938	4.27213	4.62507	4.04937
Olfr255	4.76067	5.00819	4.59393	4.80241	4.64574	4.5982	4.58808	4.35161	4.50844	4.57452	4.50842	4.35783	4.58509	4.30375	4.58238	4.92837	4.52343	4.76575	4.96663	4.80164	4.43737	4.56841	4.23302	4.49658	4.15412	4.5879	4.46594	4.52597	4.45122	4.65019	4.53176	4.59914	4.33165	4.46324	4.39806	4.53885	4.7618	4.9456	4.50945	4.588
Olfr257	5.41342	5.56587	5.42858	5.32051	5.17021	5.46635	5.30032	5.27389	5.13314	5.48008	5.03798	5.55421	5.19207	5.36022	5.46635	5.53282	5.57555	5.35677	5.40133	5.32354	5.23008	5.97548	5.4595	5.50636	5.46635	5.75114	5.33254	5.40757	5.42514	5.73905	5.39123	5.53282	5.1178	5.34327	5.03951	5.45276	5.7524	6.07438	5.9619	5.30143
Olfr259	3.14335	3.2484	3.10278	3.14679	3.2082	2.95753	3.40459	3.77658	3.46801	3.89487	3.33416	3.91725	3.00884	3.26138	3.83314	3.3255	3.49419	3.16912	3.88211	3.86941	3.14264	3.65333	2.9928	2.91685	3.11266	3.25969	3.12199	3.13435	3.09247	3.11708	3.12236	3.31005	3.04664	3.55075	3.40596	3.10846	3.60186	3.3707	3.27043	3.30089
Olfr26	4.30797	4.42752	4.43559	4.47556	4.28496	4.21758	4.32351	4.33992	4.55698	4.38589	4.28683	4.73278	4.51287	4.34018	4.34178	4.56788	4.26094	3.98962	4.12368	4.47118	4.35635	4.3405	4.18339	4.07918	4.28496	4.36635	4.24325	4.47329	4.05566	4.29482	4.09306	4.32874	4.28496	4.58797	4.04845	4.24482	4.09241	4.19922	4.15059	4.22666
Olfr262	4.37751	4.17339	4.32434	4.08046	4.31536	4.36602	4.26888	4.57439	4.60522	4.71782	4.30354	4.5194	4.06897	4.44135	4.70061	4.78002	4.44166	4.35429	4.6841	3.93788	4.10817	4.28519	4.24016	3.93354	4.21863	4.48821	4.37495	4.26742	4.37526	4.35702	4.29483	4.03895	4.25452	4.41864	4.30908	4.89599	4.27863	4.51741	4.68162	4.01945
Olfr263	3.51119	3.50002	3.4662	3.5162	3.30781	3.50816	3.39661	3.52074	3.67133	3.284	3.39501	3.35322	3.25079	3.8722	3.31618	3.53759	3.89218	3.90854	3.58527	3.74861	3.44249	3.64626	3.41754	3.09711	3.17246	3.20069	3.29216	3.55992	3.72561	3.56453	3.42469	3.30435	3.25956	3.95164	3.99499	3.23095	3.48357	3.77578	3.26548	3.21152
Olfr266	4.75758	4.62279	4.52204	4.73724	4.68999	4.42753	4.75107	4.83423	4.61039	4.63403	4.53354	4.64417	4.63252	4.60716	4.8149	4.58315	4.59283	4.42689	4.5855	4.50299	4.20608	4.87865	4.50446	4.31484	4.47646	4.75096	4.5347	4.25827	4.59179	4.63684	4.42093	4.78542	4.57074	4.97995	4.31664	4.94681	5.33853	4.61462	4.82932	4.59283
Olfr267	5.94405	5.67615	5.69361	5.86081	5.67698	5.38433	6.05726	5.60853	6.06177	5.53486	5.28916	5.36515	5.60617	5.34633	5.24862	5.40633	5.60557	5.51993	5.18098	4.86618	5.06315	5.4929	5.94355	5.61367	6.14256	5.87217	5.85344	5.66232	5.53556	5.75858	5.83947	5.59942	5.481	5.55037	5.77716	5.63293	6.18711	5.73697	6.04558	5.5783
Olfr27	3.69452	3.61487	3.60848	3.6719	3.49194	3.66129	3.53352	3.56274	3.57275	3.55246	3.55541	3.60436	3.54154	3.58692	3.7016	4.12684	3.83529	3.72789	3.60021	4.24205	3.83242	3.94503	3.51882	3.31766	3.327	3.60349	3.59551	3.5648	3.92318	3.90664	3.49863	3.59307	3.48316	3.77518	3.77965	3.52529	3.64465	3.98717	3.64529	3.70915
Olfr270	3.80263	3.75427	3.80795	3.80523	3.70703	3.75111	3.45716	3.64488	3.71433	3.96223	3.59031	4.00767	3.65708	4.02736	3.46625	3.83772	3.89858	3.86559	3.62477	3.69534	3.82007	3.9278	3.83437	3.91623	3.74471	4.36959	3.64741	3.72958	3.96262	4.46225	3.92778	4.02233	3.68939	4.07436	4.21319	4.32262	4.35983	4.12546	4.0949	4.14784
Olfr272	4.81182	4.81809	4.89642	4.80563	4.76956	4.7726	4.69594	4.79019	4.33773	4.83686	4.61179	4.73372	4.47571	4.88524	4.77629	4.80235	4.62402	4.85694	4.42881	4.95233	4.91326	5.82855	4.92902	4.7038	4.64297	4.91771	4.55071	4.58681	4.57335	4.76362	4.5589	4.85111	4.53009	5.45089	4.63353	4.79577	5.04974	5.05969	5.03788	4.4966
Olfr273	4.46748	4.49461	4.49171	4.4571	4.4037	4.35112	4.47894	4.47894	4.65351	4.17741	4.39773	4.57901	4.62745	4.49437	4.47894	4.54989	4.35439	4.41334	4.30158	4.70758	4.47894	4.83951	4.24207	4.35673	4.40008	4.58783	4.02405	4.4062	4.25658	4.54468	4.2298	4.47894	4.37035	4.27521	4.46435	5.04079	4.6295	4.45575	4.68861	4.52829
Olfr275	4.91219	4.95826	4.82355	4.69744	4.44962	4.51274	3.97397	4.2255	3.85463	4.41244	4.47101	4.53307	4.38836	4.33389	4.13541	4.45878	4.22345	4.27726	4.31363	4.94229	4.49545	4.43046	4.48959	4.07252	4.6592	4.80222	4.36724	4.60772	4.40576	4.59299	4.49927	4.50663	4.39325	4.12045	4.70973	4.58039	4.51836	4.53642	4.53878	4.58555
Olfr279	5.86734	5.67205	5.84936	5.674	5.54811	5.66307	5.36843	5.20076	5.26494	4.9222	5.01709	4.45325	5.7623	5.14476	5.21754	5.33626	5.57296	5.21174	5.16154	5.14161	5.45649	5.35853	5.70202	5.37118	5.2539	5.76577	5.51795	5.78211	5.74264	5.71025	5.63186	5.93	5.40395	6.2721	6.07415	6.03581	6.03888	6.21008	6.17113	6.04326
Olfr281	5.12816	5.59062	5.39636	5.58828	5.27439	5.21202	5.07186	5.04551	5.39453	5.25678	5.24568	5.58017	4.91786	4.88908	4.86648	4.85584	5.19588	5.29244	5.12093	5.27495	5.25433	5.28401	5.39861	5.22689	5.26867	5.5388	5.22343	5.23018	5.13689	5.44948	5.18873	5.10153	5.36239	5.54923	5.79456	5.58794	5.1357	5.33577	5.25678	5.57336
Olfr282	6.44516	6.26327	6.44841	6.08494	6.16919	6.20257	6.25674	6.31956	6.33788	6.13412	6.12841	6.15231	5.96738	6.18692	5.78102	6.2943	5.99832	5.8401	6.10421	6.153	6.20257	5.91748	6.32443	6.02786	6.01044	6.61591	6.13637	6.29086	6.20488	6.75237	6.07101	6.20257	5.86995	6.41749	6.01544	6.30421	6.56726	6.66899	6.93996	6.29253
Olfr283	5.35772	5.35772	5.19955	5.33343	5.06047	5.13118	5.17322	5.02247	5.29124	5.55118	5.20185	5.18251	5.24785	4.98958	5.24132	4.94201	5.6513	5.44889	5.24149	5.48262	5.3354	5.9002	5.20314	5.19406	5.14797	5.60194	5.29374	5.21727	5.52212	5.35772	5.26467	5.59813	5.28475	5.25599	5.5074	5.18896	5.35772	5.99454	5.85542	5.49059
Olfr284	5.76087	5.42123	5.39525	5.45061	5.29844	5.34419	5.3624	5.36163	5.34799	5.67223	5.38911	5.16676	5.02241	5.38064	5.29432	5.54019	5.05168	4.90026	5.27128	5.67207	5.16391	5.52204	5.55167	5.45365	5.50748	5.62865	5.60716	5.59605	5.8782	5.98618	5.5573	5.96586	5.39389	5.96116	6.24093	5.94482	6.06681	5.95352	5.92369	5.51431
Olfr285	5.41342	5.56587	5.42858	5.32051	5.17021	5.46635	5.30032	5.27389	5.13314	5.48008	5.03798	5.55421	5.19207	5.36022	5.46635	5.53282	5.57555	5.35677	5.40133	5.32354	5.23008	5.97548	5.4595	5.50636	5.46635	5.75114	5.33254	5.40757	5.42514	5.73905	5.39123	5.53282	5.1178	5.34327	5.03951	5.45276	5.7524	6.07438	5.9619	5.30143
Olfr286	4.85435	5.02165	4.88302	4.7928	4.71833	4.82617	5.01348	4.55699	4.59323	4.71363	4.63841	4.80082	4.75363	4.55475	4.60827	4.69144	4.68996	4.76286	4.64286	4.98025	4.79925	5.51704	4.77868	4.69209	4.75021	4.84691	4.69517	5.04602	4.8252	4.93606	4.62843	4.57427	4.68265	5.1827	4.93953	4.71476	4.56269	4.83081	4.95463	4.95392
Olfr288	4.67118	5.25404	4.76628	4.1967	4.80226	4.51886	4.53699	5.63894	4.61774	5.04637	5.20692	6.28993	4.28281	4.93944	4.93174	4.42449	4.31101	5.21861	4.56983	5.11047	5.11744	4.37925	4.29671	4.33022	4.60998	4.36377	4.20628	4.30453	4.81174	4.96672	4.99228	5.00606	4.70998	4.74095	4.41838	5.10938	4.93502	4.58949	4.37664	3.99277
Olfr29-ps1	5.36092	5.51915	5.29166	5.41812	5.44139	5.4367	5.30684	5.19012	5.17879	5.13868	5.52814	5.18568	5.37985	5.07617	5.65172	5.35435	5.13864	5.57886	5.13924	5.64384	5.34085	5.58194	5.26132	5.40262	5.3176	5.59144	5.53163	5.33758	5.14771	5.76641	5.61217	5.59876	5.57782	5.14369	5.37997	5.65128	5.38383	5.51368	5.50809	5.47045
Olfr290	3.40267	3.28578	3.43321	3.33815	3.45126	3.41446	3.81851	3.73119	4.48827	3.9068	3.39872	4.1712	3.23101	3.27288	3.36246	3.8482	3.22653	3.37074	3.5736	3.27395	3.19094	3.87916	3.5146	3.47896	3.16402	3.35735	3.51049	3.33803	3.48518	3.31564	3.28275	3.35648	3.20292	3.64575	3.53658	3.62524	3.82219	3.28365	3.25746	3.70473
Olfr291	3.61717	3.68753	3.68909	3.46407	3.51547	3.61159	3.6609	3.79521	3.95714	3.67125	3.64312	4.16884	3.53279	3.56103	3.52997	3.57903	3.43199	3.28952	3.69581	3.81176	3.4322	4.04924	3.5253	3.60665	3.63104	3.63776	3.86674	3.66685	3.70737	3.57905	3.3663	3.40585	3.41498	3.66198	3.93421	3.32089	3.68856	3.49651	3.74826	3.78393
Olfr292	3.78645	3.54129	3.57349	3.49038	3.20552	3.51089	3.58451	3.91611	4.25042	4.21761	4.06513	4.47014	3.33908	4.00671	3.65165	3.93271	3.73131	3.4272	3.61413	4.22873	3.79081	4.7168	3.41093	3.65165	3.31875	3.51612	3.45508	3.45358	3.82567	3.24428	3.47574	3.5307	3.39249	3.4467	3.87234	3.72135	4.19479	3.84181	3.57195	3.58775
Olfr293	4.1516	3.88376	4.43171	3.93892	4.22317	4.23361	4.04294	4.66352	3.86551	4.63225	3.95376	4.2942	4.25733	4.7451	4.25733	4.25733	4.29545	4.18167	4.25733	4.48839	4.36182	5.55714	3.94136	3.96087	4.0267	4.18899	4.04112	4.28997	3.63445	4.50167	4.16965	4.0967	3.87142	4.36402	4.23361	4.07894	4.19841	4.00741	4.39215	4.10858
Olfr294	3.82083	4.07354	3.99875	3.74196	3.9667	3.90127	3.85107	3.41344	3.65827	3.83031	3.61181	3.9124	3.42666	3.23877	3.4953	4.09021	4.01333	3.96344	3.67338	3.72628	3.33852	3.70252	3.80987	3.56476	3.69415	3.84712	3.91162	4.0004	4.55369	3.79771	3.51629	4.33325	3.66907	4.23048	4.6004	3.98471	3.71464	3.91928	3.68922	4.27509
Olfr295	3.35678	3.15049	3.32802	3.1177	3.25823	3.16359	3.16679	3.76069	3.9003	3.47936	3.55117	4.80953	3.23951	3.18406	3.63703	3.4144	3.66052	3.20906	3.10616	3.57791	3.23939	3.4726	2.95517	2.99602	3.09468	3.16816	3.20878	3.16819	3.10395	3.1195	3.09033	3.13627	3.16617	3.75509	3.33911	3.51378	3.34501	3.26518	3.15647	3.1442
Olfr297	4.08477	3.88627	4.07465	4.03038	3.84927	3.623	4.06193	4.12058	4.25877	4.1999	3.78828	4.41045	4.08585	4.04666	4.29633	4.1881	4.50529	4.26507	3.83316	4.58677	3.9673	4.23598	3.78065	3.75631	3.79739	4.01023	3.80595	3.75984	4.61748	4.17253	3.98182	4.0967	3.90748	4.07321	4.23799	4.02762	3.97324	4.12546	4.01612	3.84317
Olfr298	3.77601	3.63928	3.69801	3.52178	3.77622	3.51556	3.42717	3.48244	3.62928	3.49502	3.58245	3.58396	3.95821	3.40002	3.76757	4.09508	3.62005	4.43367	3.53295	4.3301	3.74176	4.04922	3.68111	3.47573	3.43795	3.78728	3.36174	3.80433	3.6274	3.63679	3.59534	3.85371	3.37774	3.5709	3.85516	3.60517	3.91516	3.57229	3.58118	3.82619
Olfr299	2.63989	2.80527	2.63949	2.93756	2.59094	2.63857	2.78526	3.1391	3.69354	3.44094	2.82927	3.58179	2.68027	2.63757	2.67963	3.18169	2.77169	3.04836	2.89836	2.99659	2.86407	2.61788	2.50054	2.75092	2.67778	2.70019	3.07917	2.72016	2.7736	2.99291	2.83178	2.66434	2.61334	3.0829	3.36682	2.60065	2.64871	2.66998	2.64508	2.57681
Olfr3	4.98293	4.93073	4.90623	5.18305	4.55709	4.86094	4.58521	5.18593	4.86724	5.00942	4.83258	5.32343	5.11199	4.99989	4.86724	4.4328	5.14382	4.70402	4.89802	4.61202	4.80602	5.0865	4.58106	4.68721	4.67604	5.49281	4.81186	4.87384	4.77942	5.08461	4.77248	4.71536	4.7431	5.42491	4.72098	5.09789	5.17243	4.92454	4.80156	4.93566
Olfr30	5.84328	5.9113	5.97997	5.80457	5.97821	5.81319	5.94222	5.70046	5.7739	5.71178	5.67974	5.29709	5.75575	5.54484	5.77918	5.42934	5.33058	5.55352	5.61922	5.88915	5.40872	5.96849	5.9546	5.91412	5.7071	6.0956	5.76047	6.0004	5.84699	6.07296	5.67785	5.54668	5.67462	5.88273	6.44657	5.9372	6.25854	6.66459	6.20624	6.58158
Olfr301	3.43688	3.30818	3.47361	3.42033	3.35805	3.32114	3.53354	3.78337	3.74403	3.79016	3.51723	4.21447	3.46891	3.34917	3.73277	3.58502	3.96773	4.17233	3.999	4.0681	3.55693	3.77635	3.58281	3.37063	3.34182	3.54779	3.39167	3.66619	3.67025	3.54127	3.44404	3.66588	3.44002	4.47614	4.09411	3.65249	3.66537	3.64839	3.48124	3.5839
Olfr303	4.24266	4.156	4.04098	4.29451	4.04728	4.135	4.15248	3.95691	3.98191	3.86851	4.33172	4.71058	4.08208	4.21997	3.85251	4.16951	3.96835	4.04804	3.81956	4.86398	4.4203	4.8173	4.13511	4.13811	3.89698	4.43511	4.16765	4.12798	4.24026	4.24429	3.83117	3.96874	4.11268	5.00583	4.57419	4.46228	4.49252	4.54144	4.56204	4.83183
Olfr304	3.83035	3.57264	3.65761	3.53572	3.44725	3.58579	3.39647	3.56779	4.54691	3.8857	3.86115	4.79252	3.78367	3.62341	3.76621	3.93849	3.94794	4.36681	3.41476	3.72571	3.46827	3.57338	3.74653	3.53063	3.38567	3.8513	3.45097	3.49194	3.7964	4.15528	3.52433	3.69143	3.71132	4.49972	4.17811	3.92125	3.712	3.93717	3.67954	3.85808
Olfr305	4.51132	4.60819	4.16794	4.21646	4.37083	4.30446	4.38827	4.4414	4.53337	4.44541	4.2318	4.70668	4.59103	4.47242	4.38389	4.71169	4.56708	4.63756	4.39627	4.85555	4.14913	5.00809	4.18196	3.94819	4.07424	4.30685	4.1946	4.20997	4.59056	4.69467	4.36641	4.54118	4.62312	4.69489	4.9225	4.70015	4.99177	5.2282	4.44044	4.30355
Olfr307	4.38836	4.49012	4.43509	4.38629	4.42433	4.39862	4.35925	4.59967	4.80532	4.56888	4.67671	4.51463	4.55646	4.88797	4.75195	4.79446	4.57777	4.80479	4.38569	5.04432	4.65458	4.76165	4.53771	4.24362	4.33069	4.57673	4.60103	4.40837	4.77555	4.70069	4.5241	4.44377	4.3194	5.11774	5.73462	4.34797	4.67063	5.34503	4.63091	4.34117
Olfr308	3.90086	3.71406	3.8283	3.78712	3.64967	3.62967	3.62951	3.91676	3.84001	3.76128	4.05061	3.83526	3.59617	3.95806	4.10167	3.69506	3.64808	4.05931	3.9117	4.03142	4.04862	4.40871	3.64802	3.67513	3.57315	3.85438	3.68056	3.71406	3.91003	3.79834	3.661	3.83844	3.5207	3.78903	4.08871	3.82374	3.97469	3.85615	4.0234	3.79755
Olfr309	4.99797	4.79211	5.0713	4.98806	4.88035	4.62204	4.59791	4.45426	4.46293	4.52751	4.97273	4.53801	4.76312	4.26212	4.53619	4.6686	5.14225	4.59521	4.66512	4.9243	4.6714	5.29082	4.90996	4.56341	4.66654	4.67349	4.73012	4.86243	4.78777	4.9031	4.84002	4.97593	4.81623	4.83674	4.88523	4.80162	4.82865	4.87815	4.84324	4.76642
Olfr31	5.22263	5.24244	5.16166	5.3522	5.18654	5.1624	5.36042	5.18654	5.07631	5.5433	5.37198	5.32884	5.12959	5.1223	4.94953	5.12207	5.21512	5.19881	5.07366	5.08823	4.9445	5.45545	5.04899	5.09656	5.09174	5.20922	5.15124	5.04569	5.43862	5.35133	5.04851	5.1858	5.17178	5.19473	5.31233	5.48088	5.72671	5.71752	5.45756	5.09751
Olfr310	3.84875	3.28082	3.76047	3.52682	3.59423	3.67049	3.83888	3.61979	3.43046	4.12926	3.42026	4.08434	3.12721	3.5684	3.40496	3.56955	3.75977	3.15092	3.85214	3.34956	3.38293	3.24363	3.45433	3.51572	3.40537	3.34669	3.49177	3.22479	4.04414	3.7832	3.40275	3.28425	3.35711	4.3882	3.88674	3.53875	4.16138	4.00224	3.45407	3.54367
Olfr311	4.31739	4.27812	4.29903	4.29796	4.29199	4.1814	4.26986	4.13326	4.35209	4.25426	4.06504	4.18922	4.37316	4.11111	4.28422	4.52188	4.63993	4.37316	4.37316	4.52657	4.2488	4.40183	4.29681	4.2571	4.20713	4.17062	4.30483	4.37316	4.37316	4.58848	4.13414	4.31883	4.30414	4.79078	4.60559	4.71757	4.48143	4.37063	4.90528	4.31583
Olfr312	4.57236	4.5098	4.74544	4.74937	4.61187	4.50622	4.76282	4.42121	4.55255	4.52088	4.72073	4.43571	4.90857	4.30916	4.2948	5.2966	4.67869	4.53516	4.58546	4.93985	4.83061	4.68503	4.76222	4.70589	4.73474	4.8997	4.94262	4.67964	4.74162	4.79291	4.5297	4.69448	4.5568	5.39356	4.88209	4.98241	4.95204	5.00016	4.71688	5.24387
Olfr313	4.85461	4.40579	4.77257	4.54579	4.7394	4.55638	4.964	4.9491	4.86653	5.06193	4.81033	5.60764	4.85693	4.59155	4.8762	4.29172	4.81685	4.71232	4.78754	4.92577	4.73069	4.86079	4.56102	4.47656	4.48726	4.60132	4.89095	4.55386	4.31988	4.72018	4.35127	5.02065	4.56387	4.47194	4.42957	4.54173	4.84074	4.78936	4.87177	4.75532
Olfr314	6.7814	6.52815	6.41732	6.74374	6.56562	6.4429	6.94507	6.87317	6.9509	6.70139	6.65274	6.89978	6.86767	6.83288	7.06533	6.86128	7.03284	6.43405	6.4523	6.8257	6.84814	6.44039	7.01215	6.73523	6.70395	7.44837	6.79996	6.92074	7.01445	7.20184	6.85327	6.71961	6.71735	6.95	6.80512	7.29084	7.30601	7.1459	7.43051	7.15168
Olfr315	5.70709	5.89711	5.92419	5.88655	5.7936	5.8245	5.58216	5.70506	5.77886	5.54967	5.77002	5.51643	5.7619	5.43329	5.86531	5.52317	5.72778	5.2184	5.56426	5.25402	5.93618	5.68672	5.95821	5.61664	5.81453	6.04772	5.3777	5.60898	6.09578	5.97758	5.7255	6.08927	5.76693	5.86826	5.92421	6.06873	6.27836	6.27678	6.56252	6.25957
Olfr316	6.56867	6.24388	6.31389	5.91233	6.04346	5.78118	6.66918	6.03054	6.38681	6.36118	6.50575	6.29992	6.63091	6.70558	6.60735	6.50132	6.14406	6.10619	5.80103	6.61681	5.65602	6.59004	6.2513	6.21252	6.403	6.4187	5.75879	6.05309	6.13945	6.2906	6.17785	6.35465	6.22949	5.61861	5.63887	6.76304	6.21117	6.44507	7.03468	6.58469
Olfr317	5.64569	5.78855	5.80445	5.44436	5.53959	5.50118	5.43727	5.42122	5.08533	5.51486	5.55155	5.02272	5.26807	5.30163	5.15077	5.50259	5.21449	5.1408	4.90224	5.28102	5.24159	5.47691	5.43574	5.44847	5.47883	5.78354	5.33464	5.47418	5.76252	5.43226	5.56302	5.65855	5.3787	5.52598	5.45286	5.71186	5.50118	5.67242	5.49689	5.30219
Olfr318	4.73584	4.62608	4.77724	4.62723	4.38751	4.43201	4.09434	4.5019	4.28301	4.28055	4.36356	4.41287	4.37502	4.43498	4.42158	4.49424	4.49245	4.01494	4.34177	4.80623	4.80631	5.59584	4.69967	4.53244	4.65283	4.78226	4.38838	4.63188	4.64735	5.02721	4.35345	4.47141	4.47779	4.93498	4.72817	4.93503	4.84287	4.78001	4.78589	4.6264
Olfr319	4.71648	4.66426	4.72248	4.42263	4.26883	4.37616	4.52876	4.75885	4.81123	4.43403	4.54093	4.51731	4.45417	4.82603	4.45478	4.66892	5.0613	4.88289	4.87329	5.07563	4.83053	5.07038	5.03561	4.52909	4.74846	5.5194	4.67987	5.09992	4.94799	4.66505	4.42543	4.84147	4.74882	5.12001	4.63024	4.97459	5.1557	5.37242	5.15995	5.07377
Olfr32	3.86373	3.94201	4.24017	3.89648	3.81198	3.53938	4.2833	3.99638	4.27926	3.67125	4.19962	4.10107	4.06612	3.83515	3.99832	3.79896	3.55985	4.01877	3.52709	4.52919	3.84576	4.05255	3.74889	3.68445	3.65124	3.72717	3.63174	3.7998	3.79564	3.68976	3.67925	3.94617	3.66316	3.96876	3.61798	3.97467	4.08764	3.72249	3.86148	3.91148
Olfr320	6.24054	5.98471	5.99833	5.91993	5.69415	6.0393	6.61367	6.7627	6.87213	6.4167	6.28787	7.03585	5.54318	5.35426	5.4072	5.54294	5.63271	6.10577	6.31949	5.52503	5.06047	5.80252	5.73166	5.05622	5.46561	6.00926	5.04662	5.75911	5.9079	5.52626	5.66519	5.89548	5.83478	5.88384	5.65369	6.09571	6.08312	5.87027	6.1643	5.4793
Olfr322	6.12461	6.02558	6.50501	5.78195	6.04018	5.98576	5.9998	5.58483	5.19315	5.42454	5.90322	5.29786	5.95526	5.95046	5.86089	5.92064	5.88695	5.42061	5.43355	6.17351	5.78914	5.9866	5.93584	6.10134	6.06479	6.09055	5.37744	6.12714	6.11622	6.51345	6.15653	6.14957	5.92399	6.6665	6.56581	6.19704	6.25048	6.68543	6.20761	6.12755
Olfr323	4.25264	4.25866	4.25866	4.0619	4.3218	4.13561	3.94205	3.85983	4.25866	3.99499	4.17233	4.0934	4.07227	4.17934	3.8809	4.14012	4.36786	4.33131	4.49574	4.44491	4.42063	4.25194	4.14545	4.1207	4.00709	4.32381	4.25866	4.25866	4.00295	4.25866	4.34656	4.08094	4.12396	4.67365	5.26826	4.0781	4.3298	4.62312	4.2005	4.36881
Olfr324	5.10051	5.02196	4.95877	4.93253	4.87299	4.8527	4.78323	4.95266	4.58969	4.72693	4.60023	4.82983	4.48404	4.72722	4.47171	4.96129	4.88405	4.81962	4.62232	4.88726	4.58577	4.75472	4.86609	4.89166	4.66519	5.07508	5.00004	4.94905	5.40379	5.25526	4.73589	4.63691	4.86346	4.62708	5.17695	5.1633	5.20968	5.76956	5.20003	5.5963
Olfr325	3.82384	3.83019	3.92182	3.73475	3.64457	3.88735	4.09101	4.23342	3.83671	4.26879	3.99832	4.65811	4.08496	4.07161	4.05848	4.10252	4.62789	4.12574	3.98653	4.12141	4.01327	4.4103	3.80978	3.815	3.67528	4.20817	3.84028	3.75437	4.33624	3.62903	3.85618	3.84734	3.59727	4.46831	4.20948	4.16654	3.76449	4.62641	4.1061	4.21718
Olfr328	5.50124	5.72158	5.81407	5.35688	5.27725	5.23813	5.69766	6.02927	5.85046	5.70359	5.55028	6.09847	5.51936	5.87884	5.18084	5.76538	5.63051	5.59258	5.54291	5.54251	5.2521	5.47277	5.3547	5.11719	5.19172	5.49645	5.13167	5.44774	5.78647	5.58982	5.39313	5.31058	5.47979	5.98405	6.23543	5.68676	5.74987	6.22285	5.70372	5.51212
Olfr329-ps	5.63705	5.57043	5.42194	5.46877	5.47099	5.35947	5.21467	5.41339	5.24769	5.35135	5.38958	5.44619	5.50996	5.45915	5.30345	5.25179	5.36446	5.14697	5.08529	4.79538	5.2329	4.88085	5.36885	5.24414	5.44378	5.97263	5.34789	5.57535	5.55872	5.63362	5.44557	5.60074	5.49732	5.45071	5.53259	5.86128	5.82416	5.56766	5.88129	5.30387
Olfr33	4.92394	4.79439	4.5955	4.7745	4.79439	4.67154	5.40881	4.70334	4.72756	4.12136	4.46343	4.72252	4.69532	4.81856	4.05284	4.61893	4.95077	5.0833	4.75663	4.93953	5.25392	5.47214	4.47693	4.5167	4.41617	4.83522	4.91231	4.62645	4.55012	4.97771	4.46278	4.67975	4.6631	4.8611	5.31082	5.12059	5.39333	5.22686	4.79511	4.88377
Olfr330	5.67272	5.52858	5.47577	5.41805	5.08529	5.34594	5.50108	5.4088	5.3808	4.98192	5.08803	4.89743	4.85793	4.68404	4.52967	4.78964	4.6769	5.0206	4.92018	5.44153	5.04366	5.0129	5.01733	5.23769	5.56591	5.44743	5.59875	5.31302	5.50919	5.36994	5.45317	5.37149	5.4483	5.56814	5.42975	5.36246	5.6463	5.64481	5.49478	4.71972
Olfr331	5.63705	5.57043	5.42194	5.46877	5.47099	5.35947	5.21467	5.41339	5.24769	5.35135	5.38958	5.44619	5.50996	5.45915	5.30345	5.25179	5.36446	5.14697	5.08529	4.79538	5.2329	4.88085	5.36885	5.24414	5.44378	5.97263	5.34789	5.57535	5.55872	5.63362	5.44557	5.60074	5.49732	5.45071	5.53259	5.86128	5.82416	5.56766	5.88129	5.30387
Olfr332	5.44398	5.56256	5.54963	5.47603	5.12763	5.27139	5.47765	5.38646	5.26861	5.44284	5.61832	5.82879	5.23849	5.11357	4.73412	5.07419	5.03662	5.04653	5.79977	5.41607	4.87091	5.21385	5.38606	5.20663	5.10179	5.69852	5.82052	5.63177	5.42707	5.78175	5.29941	5.44638	5.316	5.55673	5.62936	5.51557	6.01512	5.93768	5.98914	6.10011
Olfr338	3.82702	3.52761	3.78754	3.92837	3.5718	3.46176	4.17989	3.87561	4.3725	3.96039	3.81103	4.82462	3.52853	3.45615	3.32351	3.72927	3.93648	3.99035	3.73787	4.58173	3.62567	3.9278	3.52831	3.24744	3.35829	3.34282	3.76805	3.05822	3.91922	3.52276	3.3344	3.34726	3.32562	4.3867	3.99369	3.85954	3.76536	3.94528	3.49442	4.15298
Olfr339	3.75043	3.58391	3.56728	3.25428	3.5155	3.47158	3.58865	3.15488	3.59295	3.44784	3.26643	3.57308	3.54033	3.71891	3.3015	3.71755	3.56882	3.74617	3.52339	3.91208	3.57007	3.81942	3.20536	3.15363	3.15808	3.11868	3.30542	3.39942	3.51493	3.31556	3.41489	3.27568	3.2685	3.98241	3.86711	3.46304	3.65261	3.38748	3.49317	3.29047
Olfr340	3.74816	3.46597	3.52014	3.26064	3.50174	3.28747	3.4127	3.39729	3.20787	3.38692	3.42987	3.4221	3.32448	3.53919	3.19284	3.7613	3.66502	3.87798	3.78055	4.15675	3.49746	3.7672	2.97796	3.29301	2.97746	3.44003	3.64161	3.28373	3.17529	3.17312	3.48049	3.15123	3.11902	4.49096	3.42987	3.19139	3.842	3.72921	3.17275	3.57375
Olfr341	4.6422	4.88804	4.70436	4.56109	4.44905	4.52112	4.49212	4.45428	4.70301	4.91552	4.44256	4.68273	4.41033	4.78274	4.56088	4.67856	4.61298	4.84666	4.47944	4.73425	4.67732	4.72845	4.15793	4.28819	4.16688	4.42945	4.43478	4.44527	4.56451	4.63124	4.49928	4.27046	4.24833	4.28154	4.64427	4.55548	4.90412	5.23236	4.7647	4.57385
Olfr342	4.12608	4.04676	4.11766	4.18312	3.9367	3.63834	3.60028	3.45439	3.66586	3.56062	3.65785	3.78507	3.7249	3.7123	3.69259	4.18742	3.8015	3.79919	4.16468	3.95766	3.93792	4.33598	3.59468	3.56455	3.57042	3.67855	4.04276	3.84775	4.14161	3.92926	3.90833	3.81634	3.67589	4.74868	4.2484	3.78632	4.11306	4.01544	3.77509	3.77418
Olfr344	4.10723	3.97731	4.07791	3.80806	3.81873	3.90907	4.33982	5.29707	5.26052	5.0582	4.45873	5.62863	3.86498	4.01465	4.01563	4.86745	4.14838	4.2382	3.84933	4.56463	4.45963	4.58498	3.7477	3.56744	3.86081	4.03339	3.92058	3.92111	3.96385	4.03318	3.60092	3.57484	3.61077	4.37998	3.80208	4.29576	3.90703	4.29347	3.91443	4.03032
Olfr345	3.90422	3.80763	3.77977	3.4881	3.45953	3.44307	3.31792	3.23608	3.27773	3.44709	3.22435	3.41254	3.53842	3.49823	3.90293	3.2279	4.01619	3.49516	3.39105	3.85229	3.82306	3.99325	3.49065	3.51859	3.39833	3.4325	3.66389	3.57482	3.57781	3.46971	3.68946	3.24076	3.55073	3.74239	3.87757	3.27	3.68184	3.35707	3.4421	3.19181
Olfr346	4.11856	4.16421	4.04017	4.15308	4.2568	3.94199	4.06229	4.15501	4.26984	4.19477	4.23394	5.07064	3.94171	3.69502	4.56801	4.24655	4.24216	4.43468	3.77571	4.33996	3.97035	4.15936	3.8095	3.76277	3.76067	4.16614	3.80654	3.69721	3.98723	4.0071	3.62406	3.84172	3.92435	3.94098	4.44881	3.97346	3.92999	4.22797	3.99857	4.0155
Olfr347	4.03797	4.09344	4.00383	4.16799	4.13096	3.85876	3.99973	4.0498	4.45311	4.02794	4.0582	5.14229	3.84448	3.99205	4.17344	4.17387	3.88554	4.47495	3.9878	3.96129	4.25762	4.44072	3.68366	3.83707	4.14997	4.08036	4.13391	3.72493	4.08352	4.25022	3.91267	3.71809	3.82268	4.22123	4.22407	4.11762	4.39734	4.403	4.09052	4.06144
Olfr348	4.10273	4.02007	4.07566	3.93547	3.85588	4.02643	3.99989	4.171	3.85646	3.84028	3.97288	4.15252	3.74242	4.00945	3.95069	4.22449	4.2394	3.98805	3.94996	4.15257	4.20766	5.08776	3.68797	3.80513	3.53882	3.99228	3.74866	3.61989	4.31971	3.59167	3.72373	3.79274	3.78172	3.79433	4.12844	3.85016	4.34267	4.23131	3.81626	4.15375
Olfr350	4.16783	3.83583	3.92941	3.90706	3.71274	3.82101	3.78636	4.02564	3.84739	3.94946	3.81665	4.28685	3.77355	3.84579	3.91927	3.85825	3.71906	3.99325	3.81806	4.47029	3.92353	4.51428	3.8505	3.55619	3.77458	4.01925	4.09506	3.91067	4.29128	3.85128	3.99583	4.29017	3.76576	4.01922	4.2015	3.92622	3.97338	4.27566	3.88049	3.65355
Olfr351	4.91363	4.78935	5.07331	4.75087	5.02078	4.73907	4.89469	5.10064	5.04578	4.87058	4.62915	5.27122	4.96871	4.81076	4.86294	4.96871	4.8793	5.13973	4.98743	5.26732	5.40012	5.4355	4.8667	4.96765	4.92199	5.27356	4.988	4.92206	5.26557	4.85703	4.73084	4.95474	4.86615	5.189	4.92603	5.27912	5.13563	5.0649	4.92553	5.15263
Olfr352	4.664	4.5765	4.51343	4.46954	4.34794	4.33646	4.74883	4.59408	4.62706	4.53201	4.58769	4.70669	4.17598	4.52878	4.78896	4.65495	4.71681	4.69864	4.36393	4.31356	4.65554	4.59947	4.05746	4.04907	4.07963	4.2947	4.4512	4.20388	4.43101	4.26577	4.44939	4.15668	4.29108	4.95507	4.38087	4.70779	4.39756	4.50014	4.34453	4.29318
Olfr353	4.20006	4.26739	4.28806	4.22289	4.05631	4.21771	4.14992	4.07774	4.24353	3.98873	4.13587	4.23045	4.18297	4.50622	4.46097	4.59881	4.52961	4.94346	4.15207	4.52882	4.05126	4.62757	3.93518	4.00394	4.13382	4.27376	4.09269	4.24931	3.9638	4.40951	4.25587	4.05586	4.22139	4.66902	4.65433	4.31528	4.63121	4.46678	4.23523	4.07416
Olfr354	4.78831	5.02375	4.7947	4.74818	4.66446	4.54321	4.68575	4.77019	4.53597	5.09711	4.77471	5.11625	4.50768	4.16652	4.88151	4.48497	4.63288	4.42416	4.58747	5.03147	4.85969	5.02444	4.64658	4.20886	4.58448	4.84618	4.30399	4.88351	4.70128	4.60861	4.76664	4.82556	4.61525	4.69706	4.9148	5.05586	5.01304	5.02097	4.62656	4.4407
Olfr355	4.12085	3.89436	4.01347	3.88386	4.0019	3.79255	3.62415	3.86726	3.65916	4.14222	3.86165	4.69561	3.67138	3.95179	4.3097	3.77567	3.86322	3.60308	3.6727	4.16253	3.71153	4.14917	3.81286	3.6323	3.77863	3.83486	3.54968	3.68291	3.37844	3.84879	3.53436	3.90133	3.62415	3.77682	4.13539	3.67152	3.70147	4.11208	3.782	3.84879
Olfr356	4.38446	4.50821	4.60869	4.52527	4.38882	4.36924	4.75832	4.55201	4.8567	4.75948	4.89092	4.50442	4.5748	4.27621	4.48701	4.54476	4.22192	4.6147	4.50236	4.57341	4.57763	4.71528	4.44328	4.21942	4.20982	4.40567	4.32732	4.35564	4.75978	4.50442	4.60117	4.72699	4.4199	4.23386	4.50442	4.6104	4.17151	4.57605	4.36604	4.50442
Olfr357	4.23217	4.27508	3.99533	4.1757	4.02674	4.34741	4.27877	4.53654	3.94931	4.87629	4.66758	4.62791	4.41905	4.35944	4.03428	4.12644	4.28198	4.41649	4.45728	4.88882	3.88378	4.38991	4.19976	3.90038	3.81214	4.39734	4.09367	3.91513	4.27508	4.1866	4.35754	4.04209	3.96815	4.35358	4.24774	4.27508	4.27556	4.1757	4.30225	4.27508
Olfr358	4.42927	4.17018	4.19363	4.01965	4.19712	3.89135	3.72378	3.60527	3.75756	3.80705	3.73083	3.57001	3.70004	3.82397	3.62859	3.98733	3.88192	4.02674	4.03024	4.01621	3.81046	3.7668	3.62251	3.68721	3.74329	3.9652	3.58815	3.94839	4.02848	3.69334	3.5999	3.78181	3.62092	3.59559	3.55404	4.01906	3.87205	3.79247	3.77644	3.96566
Olfr360	4.42927	4.17018	4.19363	4.01965	4.19712	3.89135	3.72378	3.60527	3.75756	3.80705	3.73083	3.57001	3.70004	3.82397	3.62859	3.98733	3.88192	4.02674	4.03024	4.01621	3.81046	3.7668	3.62251	3.68721	3.74329	3.9652	3.58815	3.94839	4.02848	3.69334	3.5999	3.78181	3.62092	3.59559	3.55404	4.01906	3.87205	3.79247	3.77644	3.96566
Olfr361	4.62813	4.69106	4.13549	4.22229	4.75725	3.84413	4.88194	5.86109	5.59283	5.76569	5.22341	5.44101	4.80861	5.11573	5.18284	4.10656	4.73759	4.49692	4.27364	4.52036	4.37911	4.72546	4.6565	4.52341	4.69587	4.75611	4.24924	4.77615	4.64236	4.69106	4.48205	4.52737	4.38197	5.57039	4.55917	4.69106	4.93757	5.21414	4.43217	5.30137
Olfr362	6.05229	5.76859	5.77601	5.85843	5.31971	5.40704	5.24231	5.02699	4.96938	4.93895	5.21824	5.0037	4.92039	5.18407	5.84198	5.32798	5.31702	5.38127	4.8817	4.90039	5.35947	5.59493	5.37398	5.24238	5.4607	5.87548	5.1831	5.4791	5.48492	5.54328	5.3982	5.5169	5.46262	5.35793	5.70658	5.90794	5.44915	5.81322	5.52431	5.61604
Olfr365	5.48226	5.42364	5.3519	5.44334	5.43322	5.40626	5.37946	5.35964	5.26135	5.32776	5.16201	5.36057	5.22151	5.19645	5.27375	5.53818	5.19871	5.32371	5.1923	5.43772	5.28828	5.81745	5.27953	5.16684	5.3047	5.63918	5.28094	5.08473	5.81716	5.62416	5.34889	5.52956	5.50466	5.65241	5.34227	5.75023	5.81703	5.83964	6.12703	5.8336
Olfr366	4.73701	4.66183	4.76742	4.8101	4.79558	4.4521	4.79558	4.71778	4.48888	4.9143	4.7081	4.87734	5.05658	4.56334	5.01111	4.8149	4.78812	4.79558	4.81938	5.03072	4.35054	4.48655	4.80837	4.68604	4.74336	5.29179	4.50941	4.80033	4.69962	5.06209	4.85949	4.80905	4.78789	5.35595	4.76055	5.18422	5.04635	5.11277	5.18597	5.03829
Olfr367-ps	5.3374	4.56459	5.06576	4.89486	5.00939	4.78294	5.26664	4.87758	5.02931	4.91225	5.04725	6.13139	4.80405	5.24204	4.94553	4.94132	4.46481	4.40896	4.39435	4.34882	4.52565	4.91225	5.15504	5.40044	5.15671	5.6945	4.85868	5.29104	5.47235	5.40629	5.17286	5.30645	5.16069	6.22412	4.38538	6.0394	5.39944	5.36989	5.3919	5.0707
Olfr368	6.22888	5.94018	5.67529	6.08161	5.74358	5.72971	5.57853	5.78817	5.53498	5.63811	5.67099	5.62594	6.25392	6.06742	6.05852	6.03975	5.88353	5.6013	6.02187	6.1041	5.95072	6.42962	6.05723	6.10467	5.89682	6.1666	5.86529	5.89159	5.6961	6.30065	6.02396	6.00872	5.96711	6.13443	6.30147	6.16745	6.10723	6.47786	6.36924	6.39543
Olfr370	5.77006	5.7017	5.65388	5.53389	5.50767	5.58424	5.91502	5.81334	5.93087	5.68951	5.46885	5.62341	5.52001	5.2515	5.76525	5.56776	5.53151	5.75941	5.40955	5.69372	5.71632	5.77904	5.38244	5.37979	5.31588	5.68698	5.28357	5.5971	5.4672	5.426	5.41437	5.57976	5.18687	5.72968	5.68106	5.41073	5.98521	6.07645	5.77802	5.75874
Olfr371	5.45695	5.6012	5.33262	5.35583	5.2205	5.13631	4.82996	5.35246	5.06527	5.1735	5.17929	5.47138	5.23638	4.96351	5.00049	5.48105	5.7021	4.83601	5.36054	5.27608	5.0426	5.37693	5.47463	4.91195	5.21481	5.41764	5.08838	5.39432	5.28554	5.66675	5.33092	5.36135	5.38798	5.44468	5.93687	5.66659	5.59682	5.52328	5.63166	5.22652
Olfr372	5.95939	6.22115	5.81787	5.90395	5.97199	5.87904	5.91866	5.82445	6.19562	5.78004	6.03709	5.72926	5.70431	5.734	5.29468	6.15939	5.55774	5.78085	5.47933	5.97121	6.21887	6.24135	5.99435	5.81579	5.9464	6.23902	6.02535	6.06678	6.16704	5.7378	5.92285	5.87603	5.87529	6.25186	6.36246	6.21161	6.41718	6.08171	6.20252	6.09952
Olfr373	5.58874	5.36975	5.59127	5.35005	5.41331	5.43165	6.17394	5.95514	6.57962	5.77434	5.69812	5.8604	5.05485	5.33505	5.23567	5.62937	5.66311	5.44108	5.63134	5.50221	5.25091	5.51057	5.47329	5.35695	5.53252	5.97544	5.79393	5.88591	6.19413	5.63003	5.6185	5.13661	5.55998	6.56025	6.75002	6.04897	6.31517	6.56676	6.16356	6.07385
Olfr374	4.89429	4.71559	4.90316	4.89757	4.8308	4.80081	4.99235	4.92156	4.70374	4.88042	4.88699	4.96242	4.83015	4.84677	4.99743	5.08432	4.64419	4.78948	4.21252	5.14317	4.69941	4.80455	4.92156	4.96379	4.92156	5.39529	4.71104	5.23711	4.76252	5.40513	4.67332	4.99715	4.82792	5.61551	4.89615	5.29369	5.22342	5.56599	5.38602	5.46408
Olfr376	4.46507	4.52344	4.50108	4.33044	4.19222	4.28016	4.58491	4.64334	4.64229	4.82785	4.49474	5.14003	4.51751	4.57554	4.52833	4.51967	5.03816	4.43042	4.68426	4.88016	4.34852	4.73087	4.5629	4.37243	4.31508	4.74402	4.39454	4.60441	4.62984	4.74758	4.58491	4.62228	4.42822	4.8301	4.57879	4.74783	5.04916	4.37839	4.64057	4.91769
Olfr378	3.54636	3.52873	3.6513	3.62727	3.48886	3.43501	3.59548	3.61698	3.9365	3.77006	3.47835	4.22351	3.36355	3.16123	3.65802	3.60256	3.42329	3.57299	3.92719	3.88064	3.59136	3.27704	3.45162	3.53464	3.44497	3.53242	3.50546	3.27353	4.01792	3.54038	3.27806	3.61698	3.49349	4.07418	3.87803	3.55301	3.82058	3.68837	3.50788	3.61698
Olfr38	4.99287	4.91656	5.15896	4.91522	4.77305	4.84898	4.685	5.06104	4.89287	5.0144	4.708	5.50099	4.85597	5.35993	5.00594	4.80319	5.4601	5.17855	4.86757	5.36806	4.95243	5.04966	5.06857	5.01894	5.05122	5.10376	4.91581	5.03703	4.78616	5.25539	5.03124	5.12511	4.92055	5.57147	5.04679	5.33901	5.22831	5.11914	5.09782	4.76053
Olfr380	3.54823	3.48427	3.52832	3.27757	3.29295	3.48404	3.58139	3.57039	3.53409	3.41537	3.44139	3.499	3.39872	3.29821	3.19667	3.32672	3.30378	3.50366	3.51351	3.47846	3.53289	3.87985	3.20103	3.25534	3.2224	3.60663	3.23648	3.62393	3.41981	3.38709	3.2957	3.38385	3.1515	4.1911	3.98962	3.48971	3.75942	3.88974	3.53232	3.53692
Olfr381	4.25502	3.92647	4.37746	4.13025	4.03932	4.16543	3.74206	3.92165	3.93732	4.27875	3.65902	4.05538	4.19688	4.10553	4.45269	4.29937	4.27966	4.15424	4.38747	4.22262	4.16942	4.15811	4.09666	3.88771	4.14697	4.49883	4.03046	4.15679	3.92347	4.08389	4.31518	4.49602	4.16273	4.68756	4.49147	4.03449	4.61261	4.55342	4.21021	4.36526
Olfr382	4.17105	4.17449	4.19433	4.15365	4.07883	3.98941	4.23602	4.18674	4.60068	4.51905	4.38643	4.44687	3.81699	4.33531	3.93447	4.48361	4.28602	4.49814	4.10295	4.20626	4.18273	4.04653	3.87793	4.11877	4.19579	4.35969	4.35293	4.0069	4.45227	4.49585	4.19148	4.1389	4.0668	5.04027	4.36738	4.16394	4.2407	4.58961	4.26894	4.20357
Olfr384	3.86004	3.39629	3.66828	3.61797	3.56172	3.58934	3.94867	3.80203	4.11821	3.68481	3.81186	4.21524	3.49566	3.84837	3.4238	3.90132	3.61996	3.80061	3.91559	3.94423	3.62651	4.28111	3.48207	3.30819	3.46453	3.9703	3.47104	3.68116	3.95707	3.72872	3.48113	3.73298	3.41138	3.51928	4.08317	3.75663	3.90823	3.87086	3.69619	3.83331
Olfr385	3.5512	3.75948	3.5405	3.71089	3.43921	3.49986	3.68692	3.4175	3.8004	3.60322	3.82581	4.51337	3.24229	3.64097	3.42287	3.90178	3.30771	3.64196	3.40709	3.64507	3.60336	3.89851	3.46659	3.25753	3.38837	3.50969	3.17572	3.541	3.57489	3.4387	3.68568	3.29105	3.31689	4.03336	3.54365	3.84029	3.74999	3.75017	3.35479	3.56117
Olfr389	4.29823	4.31485	4.20761	4.26832	4.04096	4.09581	4.20026	4.72555	4.48024	4.33087	4.40095	4.95677	3.99101	4.22006	4.02469	4.10317	4.14895	4.55642	4.52275	4.04824	4.35762	4.34648	4.05139	3.85293	4.20761	4.14171	4.08186	4.17685	4.13329	3.77709	4.34723	4.23416	3.99057	4.30757	4.36445	4.46776	3.88953	4.23979	4.17197	3.90089
Olfr39	5.16077	5.00681	5.20245	4.87381	4.84194	4.95255	5.18302	5.25324	5.44211	5.12039	5.17756	5.9484	5.01717	4.75669	5.54521	4.99338	4.93103	5.46018	4.60972	5.47069	4.82666	5.26795	4.73613	4.70318	4.8159	4.88427	4.84306	5.29246	5.18323	5.01754	4.85359	5.03415	5.16262	5.47671	5.29422	5.11389	5.27713	5.30584	5.14879	5.14389
Olfr390	4.12064	4.1052	3.97411	3.94196	3.79288	3.73786	3.74844	3.70187	3.69254	3.58977	4.11334	3.8951	3.91881	3.63987	3.88564	4.00664	3.82384	3.6332	3.77522	4.40178	3.89572	4.14288	3.8383	3.85274	3.70958	4.03772	3.66748	4.25023	3.88564	3.82702	3.945	4.05247	3.72949	3.48462	3.87859	4.35828	4.09545	3.79316	4.04959	4.15048
Olfr391-ps	4.76067	5.00819	4.59393	4.80241	4.64574	4.5982	4.58808	4.35161	4.50844	4.57452	4.50842	4.35783	4.58509	4.30375	4.58238	4.92837	4.52343	4.76575	4.96663	4.80164	4.43737	4.56841	4.23302	4.49658	4.15412	4.5879	4.46594	4.52597	4.45122	4.65019	4.53176	4.59914	4.33165	4.46324	4.39806	4.53885	4.7618	4.9456	4.50945	4.588
Olfr392	3.59542	3.39792	3.26382	3.3589	3.48568	3.3438	3.28441	3.25013	3.40177	2.97903	3.12941	3.2691	3.55775	3.28554	3.32522	3.47095	3.59932	3.55859	3.34324	3.31968	3.24463	3.77929	3.1679	3.4168	3.2691	3.45134	3.53521	3.2668	3.6789	3.28612	3.30645	3.4082	3.33345	4.15015	3.30189	3.32538	3.84787	3.61612	3.33521	3.32302
Olfr393	3.91236	3.66012	4.05787	3.62742	3.59935	3.54234	3.79163	4.1574	4.13704	3.7798	3.79408	4.90034	3.78591	3.99247	4.00275	4.06056	4.0989	3.83458	3.61638	4.08257	3.75981	4.3802	3.49805	3.40554	3.47577	3.8074	3.60314	3.41826	3.79163	4.00972	3.80492	3.79163	3.53701	3.58811	3.74414	3.7654	4.03686	3.68143	3.65785	3.72456
Olfr394	4.06309	4.37075	4.27885	4.14948	4.10521	4.2401	4.20942	4.21674	4.45023	4.12338	3.97807	5.01225	4.1937	4.02476	4.30986	4.57821	4.24338	4.37213	4.03024	4.56486	4.59587	4.63331	3.95178	3.98508	4.17404	4.23457	4.1217	4.14147	4.23595	3.61535	3.80954	3.79272	4.3064	4.3058	4.21287	4.03343	4.27553	4.48594	4.18207	4.50534
Olfr395	4.76067	5.00819	4.59393	4.80241	4.64574	4.5982	4.58808	4.35161	4.50844	4.57452	4.50842	4.35783	4.58509	4.30375	4.58238	4.92837	4.52343	4.76575	4.96663	4.80164	4.43737	4.56841	4.23302	4.49658	4.15412	4.5879	4.46594	4.52597	4.45122	4.65019	4.53176	4.59914	4.33165	4.46324	4.39806	4.53885	4.7618	4.9456	4.50945	4.588
Olfr397	3.91008	3.84356	4.07655	3.93818	3.96415	3.97693	4.22331	3.96045	4.03445	4.01306	3.85933	3.99712	4.06165	3.88549	3.89078	4.30343	4.50904	4.19724	3.82301	4.54197	4.32045	4.55495	3.93455	3.86882	3.82043	4.31462	4.1053	4.05023	4.19734	4.35768	3.95643	3.994	3.84311	4.53889	4.13539	4.06627	3.96994	4.21081	3.97118	4.02489
Olfr398	6.11047	6.11498	6.16506	6.12732	5.90032	5.49283	5.95161	6.06986	6.04852	5.92205	5.96634	5.93924	6.03318	5.84232	5.89018	6.23542	5.83941	5.72152	6.17493	5.95161	5.99016	6.07073	5.85395	5.69493	6.07892	6.03309	5.79255	6.09875	5.91367	5.86352	5.72466	5.94036	5.87689	6.09258	5.84346	5.99389	6.06505	6.12679	6.13046	5.84721
Olfr399	5.04999	5.13747	4.97475	4.82592	4.75317	4.93234	4.99108	5.4814	5.3989	5.29073	5.24198	5.48871	5.49239	5.54796	4.71679	5.27025	5.01759	5.00103	5.24821	5.3614	4.91326	5.73851	4.93302	4.79617	5.07217	5.52953	4.74708	5.17975	4.77059	5.18164	5.07986	5.06675	4.98632	5.13936	4.997	5.03197	5.07665	5.00403	5.49245	4.98411
Olfr401	6.29134	6.21243	6.22649	6.28741	6.53546	6.35896	7.02572	7.443	7.50794	7.2108	7.21419	7.57164	6.58981	6.38301	6.49786	6.80443	6.7705	6.58909	6.82213	6.69619	6.65215	6.35126	6.6645	6.38199	6.14205	6.97762	6.1936	6.87458	6.18724	6.61673	6.43927	6.54166	6.51743	6.35203	6.56403	6.71414	6.53339	7.36434	6.9414	7.00378
Olfr402	5.21551	5.30608	5.34391	5.20649	5.14259	4.98507	5.60224	5.3037	5.27131	5.13299	5.4379	5.37884	5.13523	5.29413	5.55567	5.25501	5.16807	5.32055	4.96248	4.98087	5.13691	5.31688	5.08981	4.8007	4.97031	5.57834	5.11158	5.31126	5.07892	5.15361	5.13666	5.01083	5.12336	5.41406	5.24641	5.37508	5.09766	5.4654	5.22888	4.95227
Olfr403	4.85672	5.05686	4.70945	5.03625	4.83349	4.69566	4.44576	4.50018	4.23311	4.18142	4.58014	4.44567	4.6242	4.177	4.47559	4.62404	4.4982	4.42688	4.52582	4.57422	4.31467	4.71629	4.54706	4.65053	4.44938	4.90493	4.70172	4.58378	4.87543	4.72541	4.37796	4.34653	4.42402	4.84845	4.7968	4.84478	5.10116	4.92613	4.68234	4.71204
Olfr406	5.55286	5.25718	5.49658	5.19054	5.16672	5.29711	5.30143	5.32438	4.90734	5.08533	5.19201	5.39508	4.93725	4.8225	4.86518	5.35072	5.21546	4.93696	4.7792	5.17728	4.96888	4.72063	4.99836	4.74529	4.88003	5.3934	4.60054	5.04928	5.17786	5.26957	4.43773	5.04928	4.89752	5.17612	5.16651	5.19146	5.32305	5.20405	5.10505	5.1978
Olfr410	4.76204	4.61113	4.62619	4.76083	4.45443	4.5212	4.59136	4.56098	4.57113	4.53026	4.6744	4.25777	4.31888	4.33928	4.51021	4.6748	4.36341	4.25542	4.77204	4.56864	4.18451	4.39898	4.48157	4.30333	4.42248	4.57654	4.36959	4.62262	4.37316	4.48205	4.34822	4.67089	4.30261	4.68138	4.70043	5.00054	4.39277	5.08853	4.73278	4.9531
Olfr411	6.40488	6.30667	6.3077	6.11007	6.24596	6.38594	6.08248	6.42077	6.01428	6.04539	5.97581	6.06199	6.32278	5.74989	6.08652	5.98515	6.31346	5.90093	6.11003	5.95101	6.32778	5.98419	6.11099	5.88595	5.971	6.47675	5.85839	6.17878	6.33463	5.97896	5.97583	6.12361	5.88604	6.16271	6.2695	6.40524	6.23901	6.54016	6.32506	6.20123
Olfr412	5.88349	5.97045	5.96552	5.70901	5.65435	5.653	5.6747	5.56749	5.55753	5.69464	5.41233	5.84709	5.82921	5.94757	5.76873	6.14394	5.79341	6.10512	5.69311	5.90457	5.82921	6.14962	5.70011	5.55892	5.76841	6.2642	5.62004	5.84402	5.70761	6.13653	5.73264	5.88735	5.6092	6.00052	5.81784	6.01302	6.07594	5.66057	6.11324	6.20706
Olfr414	5.41097	5.18787	5.39387	5.52033	5.28826	5.26531	5.38214	5.27702	5.47805	5.0991	5.08971	5.20022	5.25149	5.40178	5.12627	5.24766	5.17535	5.23653	5.58891	5.38762	5.09495	5.50381	5.39634	5.39387	5.14812	5.54349	4.51538	5.37443	5.30866	5.56206	5.35403	5.40421	5.23882	5.39852	5.64889	5.64983	5.38002	5.90621	5.21336	5.39387
Olfr417	6.21925	6.11697	5.85984	5.93608	6.12416	6.07299	5.86559	5.82739	5.60096	5.95099	5.78224	6.11858	5.76243	5.41927	5.71435	6.11354	6.12299	6.20716	5.97972	6.14176	5.70882	6.01504	5.99321	5.59182	5.82716	6.05297	5.71769	5.8255	5.99319	5.98806	5.90049	5.93521	5.80926	5.63633	6.22458	5.83875	5.68809	5.99405	6.30411	6.30842
Olfr418	4.56339	4.51693	4.71412	4.39712	4.59716	4.58516	4.64041	4.53911	4.56337	4.76252	4.64057	4.64294	4.40203	4.82008	4.49482	4.75172	4.70724	4.48654	4.54658	4.62973	4.92526	5.19745	4.43029	4.35263	4.34187	4.59222	4.56367	4.52509	5.03272	4.44134	4.72121	4.55922	4.24254	5.0866	4.66568	4.58529	4.77907	4.69171	4.62389	4.62847
Olfr419	5.35374	5.26048	5.31136	5.39452	5.19859	5.00623	4.8826	5.00846	5.29697	5.18621	5.23395	5.4262	4.99061	5.37024	4.88797	5.02364	5.29504	5.18072	5.04056	4.68517	4.80816	5.35826	5.23624	5.13918	5.12568	5.30682	5.34301	5.0305	5.33298	5.4684	5.09166	4.85553	5.21465	4.70523	4.97449	5.77188	5.25179	5.36573	5.64298	5.64284
Olfr420	5.0346	4.87775	5.10897	4.80881	4.83638	4.98825	4.50858	4.53589	4.70736	4.76469	4.77109	4.724	4.92497	4.55258	4.73644	4.82004	4.6061	5.03044	4.43337	4.58816	4.4287	4.92364	4.77869	4.56245	4.82004	5.05733	4.75268	4.72536	4.7669	5.26521	5.09485	5.14197	4.87071	4.7983	4.52388	4.91237	4.82004	5.20236	4.96508	4.89546
Olfr421-ps1	4.32715	4.33125	4.25108	4.38939	4.22648	4.19873	4.26039	4.26039	4.18306	4.82051	4.46743	5.40053	4.16635	4.08848	3.81202	4.42581	4.68328	4.14718	4.30873	4.61875	4.42891	4.47455	3.86858	3.84594	3.96989	4.27952	4.1873	3.8369	4.38267	4.70446	3.7531	4.43019	4.1681	5.13009	4.46239	4.20705	4.53429	4.64216	4.3065	4.02282
Olfr424	5.19507	5.10295	4.96819	4.84756	4.82471	4.8261	5.2063	5.53994	5.24273	5.00734	5.21901	5.11841	4.74808	4.99722	4.86131	5.36104	5.21672	5.15345	5.38598	5.75629	5.54316	6.03461	4.98432	4.62143	4.55621	5.27264	4.92972	4.91298	4.86687	4.84697	4.98838	5.04149	4.94421	5.32111	5.37188	4.98229	5.41433	4.9387	4.94792	5.37396
Olfr426	4.30455	4.25914	4.37246	4.24627	4.35358	4.203	4.34181	4.76313	4.62466	4.66319	4.67653	5.14674	4.25988	4.48921	4.62117	4.5068	4.95598	4.90594	4.5594	4.43322	4.394	4.54695	4.06176	4.24672	3.78008	4.31302	4.27024	4.22722	4.24772	4.58867	4.34048	4.40135	4.22087	4.35358	4.09314	4.387	4.56118	4.27632	4.17779	4.13683
Olfr427	4.30455	4.25914	4.37246	4.24627	4.35358	4.203	4.34181	4.76313	4.62466	4.66319	4.67653	5.14674	4.25988	4.48921	4.62117	4.5068	4.95598	4.90594	4.5594	4.43322	4.394	4.54695	4.06176	4.24672	3.78008	4.31302	4.27024	4.22722	4.24772	4.58867	4.34048	4.40135	4.22087	4.35358	4.09314	4.387	4.56118	4.27632	4.17779	4.13683
Olfr429	4.65944	4.61	4.74582	4.37996	4.54734	4.40928	4.62059	4.78278	4.60823	4.29962	4.45215	4.47841	4.5949	4.37575	4.90162	4.35417	4.88015	4.5949	4.80362	4.98853	4.76748	5.10125	4.68159	4.44667	4.40723	5.23126	4.57533	4.53243	4.71996	5.05146	4.38719	4.56808	4.48837	4.87425	4.37508	4.88255	4.69498	5.07423	4.98959	4.99974
Olfr43	3.12759	3.23627	3.44211	3.38736	3.25957	3.2456	3.13042	4.01945	3.60682	3.23471	3.34979	4.21673	3.32842	3.76804	3.56831	3.48938	3.76373	3.85944	3.52609	3.2589	3.60931	3.73726	3.24405	2.98635	3.13035	3.82862	3.44222	3.29227	4.11939	3.22124	3.48434	3.87222	3.30934	3.73493	3.98209	3.26279	3.56792	3.31351	3.79638	3.70843
Olfr430	4.28359	4.02101	4.16652	4.25558	4.38731	4.17777	4.04246	4.16109	4.23376	4.02927	4.26052	4.04764	3.84313	3.6935	3.89383	4.42099	3.92642	4.14024	3.90482	4.32956	3.92538	4.20854	3.85912	3.94482	3.73625	4.08307	4.30782	3.75259	3.68301	3.83109	3.9778	4.18059	4.22295	3.76357	4.216	4.24557	3.91549	4.15423	4.08853	3.72749
Olfr432	4.21407	4.28156	4.47554	4.31433	4.23034	4.29588	4.32343	4.41896	3.98191	4.16551	4.35285	4.19991	4.62389	4.52857	4.47025	4.39601	4.6668	4.45456	4.52656	4.23685	4.12976	4.06544	4.42284	4.31928	4.32222	4.45153	4.46355	4.45957	4.65733	4.70094	4.34854	4.6119	4.67623	4.35499	4.46751	4.60505	4.49521	4.47766	4.50869	4.32149
Olfr433	5.57476	5.70614	5.71653	5.46586	5.55618	5.48378	5.8381	5.6287	5.58854	5.90186	5.75398	5.63203	5.5852	5.21701	5.07224	6.11468	6.11791	5.45624	5.7234	5.54651	5.60053	5.20092	5.70614	5.65123	5.64114	5.63246	5.3625	5.71756	5.31095	5.44857	5.53054	5.49918	5.50553	5.57498	5.68705	5.45224	5.45665	5.85301	5.62476	5.66803
Olfr434	4.68356	4.68936	4.77841	4.56294	4.57817	4.79667	4.74273	4.4592	4.35659	4.49757	4.72145	4.36885	4.68263	4.5028	4.8594	5.05147	4.84235	4.77461	4.92746	4.71461	5.00329	4.93043	4.76981	4.81052	5.04228	5.0235	4.54695	4.47183	4.47463	5.02577	4.81052	4.81388	4.54373	5.4876	4.84627	5.11081	4.98876	5.46248	5.05206	4.76989
Olfr435	5.54431	5.64596	5.59218	5.54611	5.54611	5.51936	5.72229	5.4222	5.24409	5.79015	5.35394	5.51932	5.25096	5.57239	5.1843	4.97952	5.39045	5.14762	5.48136	5.7404	5.53087	5.20669	5.56336	5.70933	5.66954	5.8469	5.46005	5.63799	5.51681	5.75208	5.46427	5.49615	5.60907	5.70667	6.18635	5.78881	5.82214	6.15644	5.93426	5.69056
Olfr437	4.88372	4.88252	4.88425	4.9318	4.82718	4.94997	4.76358	5.287	4.71317	5.0291	4.75259	5.0872	4.72274	4.63297	4.81753	4.65366	5.26899	4.88413	5.49171	4.85911	4.91372	5.03133	4.76242	4.77698	4.59517	5.21522	4.78171	4.83062	4.90369	4.8151	4.74217	4.91881	4.96838	5.19553	4.84546	5.14435	5.30917	4.90839	5.00061	5.23218
Olfr44	3.61968	3.43655	3.63248	3.85453	3.68662	3.44795	3.33985	3.76671	3.69562	3.50096	3.62894	3.58701	3.51779	3.62326	3.55947	3.77361	3.5744	4.02051	3.65757	3.81392	3.70706	3.82523	3.3113	3.33533	3.16724	3.69258	3.30542	3.31398	3.44082	3.43254	3.3725	3.54034	3.28922	3.2218	3.63991	3.38856	3.41697	3.92685	3.37863	3.36129
Olfr441	5.01993	4.87895	5.02843	5.13497	5.15465	4.8951	5.29207	5.10334	4.87859	5.07795	5.03177	5.2312	4.49358	4.57554	4.61419	4.59269	5.24582	5.09317	4.67005	4.96945	4.68932	5.1507	4.93132	4.8894	4.98434	5.13926	5.16427	4.88136	4.80637	5.20958	5.07926	5.41352	4.88962	4.8653	4.99486	5.28834	5.3194	5.33179	5.19552	5.07959
Olfr444	5.35834	5.15524	5.1126	5.37858	5.22526	5.32697	5.16587	5.00617	5.10186	4.91025	4.8163	4.92386	5.2732	5.62527	5.31069	5.61909	5.26511	5.13594	5.63311	5.35725	5.36194	5.59723	5.37858	5.03218	5.25884	5.65829	5.24691	5.2435	6.24871	5.83148	5.36726	5.37796	5.17864	6.45415	6.0269	5.28077	6.09816	6.29288	5.76862	5.3269
Olfr446	4.31063	4.24797	4.21921	4.27572	4.15839	4.19383	4.73006	4.72331	5.25935	5.0635	4.61651	6.13858	4.3397	3.97032	4.61175	5.00498	4.30433	4.22997	4.54778	5.25132	4.54381	4.83595	4.33931	4.47042	4.17046	4.42037	3.98639	4.68114	5.11748	4.38324	4.25247	4.13428	4.18309	5.27961	4.73281	4.69512	4.66462	5.03984	4.5857	4.65339
Olfr447	5.3107	5.16372	5.1748	5.20633	5.06542	5.16536	5.05446	5.05148	5.14028	5.1376	4.97933	4.99159	4.85675	5.04102	5.08461	4.93471	5.40303	4.96704	4.74704	4.85094	4.81184	4.92505	5.00672	4.95904	5.00588	5.6335	5.05828	5.26863	5.21827	5.32411	5.12199	5.12737	4.92063	5.25241	5.03248	5.12827	5.0836	5.39597	5.13629	4.9648
Olfr448	4.62715	4.69122	4.75557	4.9238	4.82941	4.94421	5.0367	4.99778	4.79171	4.93108	4.94391	4.83525	5.03146	4.91012	5.07097	5.04488	4.82179	4.95199	4.93157	4.94245	4.91169	5.23622	4.98955	4.61664	4.82888	5.24224	4.81268	4.83221	4.5952	4.65698	4.71621	4.90984	4.70882	5.7631	4.86458	5.29035	5.01046	5.20717	5.05966	4.79959
Olfr449	4.72373	4.63883	4.73953	4.51644	4.66562	4.48283	4.71947	4.74607	4.4454	4.61754	4.44307	4.66562	4.55749	4.52811	5.11278	4.82006	4.89211	4.57143	4.89195	4.73618	4.74275	4.78449	4.50805	4.54691	4.5648	4.66562	4.42111	4.0187	4.93482	4.86749	4.73357	4.52887	4.58556	4.4647	4.65602	4.78164	4.96566	4.9878	4.67027	4.96716
Olfr45	5.80507	5.72915	5.42062	5.74553	5.34312	5.64449	5.66868	6.06383	5.7086	6.35277	5.62883	5.79127	5.53417	5.80266	5.12311	4.7124	5.27403	5.02538	5.05473	4.95622	5.06492	4.82295	5.06574	5.0011	5.07483	6.05626	4.93111	5.22578	5.17797	5.65383	5.10014	5.18977	5.13849	5.43955	4.94259	5.5424	5.52257	5.36988	5.73059	5.13328
Olfr450	4.98321	5.04856	4.97585	5.06294	4.92174	4.86323	5.09695	4.67688	5.04278	4.84747	5.03533	5.18522	4.9421	4.97112	5.2558	5.31389	5.26141	4.91432	4.67304	4.71454	4.80526	5.19699	4.73193	4.63463	4.75108	5.29452	4.8345	4.87494	4.82168	5.28614	5.09161	4.93985	4.73711	4.73068	4.69858	5.46183	4.98453	4.92174	4.92174	4.80428
Olfr452	3.70845	3.29577	3.74522	3.36765	3.44861	3.32119	3.25125	3.47869	3.34884	3.94592	3.39833	3.28234	3.52805	3.91884	3.61899	4.33736	3.68492	3.51886	3.81292	3.11431	3.47869	3.60842	3.57094	3.09846	3.66118	3.1143	3.58401	3.4529	4.3027	3.51931	3.23526	3.59216	3.3855	3.58879	3.63777	3.42563	3.4303	3.40353	3.07673	3.32939
Olfr453	4.89545	4.80054	4.80488	4.81683	4.6176	4.57783	4.74666	4.74613	4.49994	4.36386	4.56152	4.75456	4.9746	4.60187	4.74012	4.76077	5.1805	4.5644	4.86457	4.86419	4.78417	4.83414	4.77642	4.70556	4.61618	4.77169	4.64139	4.5067	5.1511	4.78704	4.72576	4.47699	4.64746	4.52658	4.79957	4.70622	4.76764	4.80579	4.94662	4.80663
Olfr455	5.02794	4.57737	4.79934	4.9106	4.53096	4.62166	4.99514	4.90876	4.26055	4.44407	4.7905	4.32517	4.72462	4.48779	4.78309	4.83669	4.76572	4.49298	4.6904	5.24606	4.55863	4.6927	4.81711	4.55695	5.05454	4.89757	4.68481	4.61138	5.30679	4.83509	4.98749	5.02949	4.83112	4.84179	5.04201	5.09952	5.02837	5.22104	4.90293	5.00164
Olfr456	5.65927	5.47831	5.49337	5.60744	5.41613	5.32472	5.83918	5.66339	5.13361	5.75736	5.67135	5.33479	5.82174	5.455	5.60102	5.45473	5.61917	5.63658	5.86392	5.55744	5.30796	5.19985	5.37952	5.23831	5.37027	6.15312	5.57432	5.71199	5.56757	5.46252	5.86738	5.73729	5.59067	5.91453	6.16735	6.15456	5.62385	5.97149	5.75846	5.71248
Olfr457	5.65927	5.47831	5.49337	5.60744	5.41613	5.32472	5.83918	5.66339	5.13361	5.75736	5.67135	5.33479	5.82174	5.455	5.60102	5.45473	5.61917	5.63658	5.86392	5.55744	5.30796	5.19985	5.37952	5.23831	5.37027	6.15312	5.57432	5.71199	5.56757	5.46252	5.86738	5.73729	5.59067	5.91453	6.16735	6.15456	5.62385	5.97149	5.75846	5.71248
Olfr458	5.73379	5.71453	5.69552	5.49439	5.42254	5.37113	5.96109	5.78999	5.75686	6.19291	6.34725	5.63644	5.88253	5.52091	5.70713	6.2323	5.91314	6.246	5.95548	5.82316	5.45704	5.51129	5.62872	5.26298	5.28756	5.89731	5.31769	6.08001	5.68603	5.77023	5.63232	5.76309	5.68242	6.55725	5.89283	6.2149	6.01828	5.6865	6.05826	5.7227
Olfr459	5.41069	5.27992	5.35212	5.19574	5.03014	5.24812	5.24673	5.31996	5.3142	5.27362	5.28008	5.6081	5.23787	4.89759	5.2901	4.8944	5.21672	5.27287	5.02779	5.20377	4.9699	5.55803	5.07583	4.98991	5.10172	5.4624	5.11942	5.26804	5.24108	5.50022	4.90186	5.14238	4.90117	5.46827	5.34157	5.25963	5.59964	5.17842	5.11489	5.16026
Olfr46	5.80507	5.72915	5.42062	5.74553	5.34312	5.64449	5.66868	6.06383	5.7086	6.35277	5.62883	5.79127	5.53417	5.80266	5.12311	4.7124	5.27403	5.02538	5.05473	4.95622	5.06492	4.82295	5.06574	5.0011	5.07483	6.05626	4.93111	5.22578	5.17797	5.65383	5.10014	5.18977	5.13849	5.43955	4.94259	5.5424	5.52257	5.36988	5.73059	5.13328
Olfr460	4.50311	4.35183	4.34425	4.3958	4.26512	4.11704	5.14412	5.0926	5.23026	4.82707	4.6012	5.60839	4.4445	4.33089	4.42588	4.53978	4.58186	4.76951	4.34886	4.50024	4.43248	4.53257	4.39858	4.28789	4.12179	4.40866	4.12077	4.41116	4.28608	4.57093	4.41478	4.3173	4.02844	4.27929	4.49445	4.42552	4.43907	4.43248	4.68689	4.42416
Olfr461	4.02657	4.15965	4.14164	4.25938	4.0388	4.01076	5.29016	4.4726	4.17426	4.48124	3.93439	4.64023	3.86952	3.9961	4.15617	4.40791	4.39806	3.73609	3.75258	4.26524	3.83676	4.44549	4.0206	3.86986	3.90271	4.25146	3.94701	3.85571	3.88412	3.92724	3.67603	3.93385	3.79361	4.51362	3.76932	4.30768	4.2129	3.81926	4.13256	3.81203
Olfr462	6.7435	6.69196	6.66059	6.59264	6.45868	6.49947	6.39024	6.34133	6.44009	6.66597	6.67071	6.40366	6.27408	6.12328	6.40648	6.41621	6.43189	6.31036	6.43299	7.17535	6.77631	6.61698	6.33674	6.44652	6.53738	7.47149	6.67364	6.71921	6.75186	6.79432	6.56314	6.51792	6.45549	6.81009	6.2389	6.78746	6.36453	7.07511	7.14852	6.95748
Olfr463	5.57773	5.77906	5.54979	5.74455	5.57222	5.71128	5.43067	5.70791	5.66725	5.5885	5.45457	5.69435	5.32033	5.51026	5.08793	5.61309	5.50881	5.426	5.40025	5.51521	5.44937	5.46552	5.70762	5.28111	5.38856	5.71025	5.36253	5.65731	6.05405	6.07336	5.43508	5.81571	5.23795	5.38309	5.83859	6.16171	5.88003	6.54541	6.06026	5.99986
Olfr464	5.81124	6.02441	5.73632	5.98459	5.71747	5.51595	5.63164	5.85234	5.50572	5.91543	5.96935	5.80481	5.58606	5.62199	5.76805	5.92868	5.50249	6.00568	5.95846	5.96329	5.4375	5.89689	5.6884	5.7455	5.4486	5.86157	5.60098	5.90295	5.97625	6.1519	5.73526	5.81518	5.82177	6.01703	6.15907	6.10851	6.10967	6.67508	6.25958	6.2957
Olfr466	4.00877	4.08055	4.03024	3.76519	4.00697	3.85444	3.94665	4.06321	4.58595	3.90688	4.03347	4.976	4.03544	3.79844	3.86888	3.82253	4.37384	4.65583	4.16061	4.12814	3.95808	4.43219	3.69963	3.70456	3.68993	4.13459	3.68295	4.00697	3.73213	3.85308	3.49733	4.23656	3.7519	3.96806	3.91371	4.08867	4.00697	4.00889	4.26386	4.05007
Olfr467	5.69802	5.35995	5.15787	5.05224	5.2036	4.98492	5.94075	5.96794	5.43072	5.41514	5.64021	5.22201	4.87118	4.74695	4.67	4.99014	4.94297	5.07213	4.29937	5.22863	4.97507	5.64657	5.04978	4.77215	5.00047	5.39617	4.9867	5.23778	5.0191	5.19673	5.02364	5.08013	4.96055	5.08319	4.92167	5.27453	5.42545	5.3196	5.32612	4.80898
Olfr469	3.9634	3.91665	4.02794	4.11369	4.10114	3.78772	4.42165	4.87369	4.63476	4.66097	4.48424	5.62161	4.21124	4.02561	4.20868	3.26706	4.06002	4.26971	3.77748	4.65539	4.24356	4.48772	3.86661	3.771	3.90057	4.00032	3.91845	3.86587	4.80302	3.97514	3.9887	3.9477	3.92407	4.74559	4.63723	4.10608	4.15238	4.41609	4.21615	4.22358
Olfr47	4.58389	5.15008	4.4099	4.53132	4.63426	4.67606	5.13447	4.58066	4.40365	4.60847	4.88129	4.37903	4.56437	4.71344	4.8922	4.72825	5.04418	4.6988	4.57157	5.43329	4.94231	4.94862	4.80148	4.24994	4.44159	4.6532	4.52733	4.76291	5.18679	4.95596	4.43288	4.8144	4.37116	5.24846	4.75648	4.61445	4.90146	5.1737	4.99467	4.76398
Olfr470	3.68346	3.90079	3.94716	3.76245	3.66625	3.51523	4.00558	4.11039	4.33438	4.05355	4.08554	4.47677	3.73823	3.63136	3.88478	4.04938	3.7854	4.01835	3.75256	3.85679	3.86563	3.81772	3.83049	3.70829	3.85806	3.86563	3.90412	3.77426	3.9711	3.73888	3.65264	3.85671	3.6537	4.33036	4.13191	4.10139	4.16799	4.1094	4.27943	3.69052
Olfr472	2.85452	2.88202	2.98478	2.79504	2.63114	2.72444	3.05791	2.9611	2.93677	3.0001	2.79783	3.83019	2.89271	3.22804	2.73467	3.15705	2.9726	2.98764	3.21419	3.28185	3.20219	3.1091	2.67221	2.91945	2.82235	2.97176	3.09982	3.02168	3.29682	2.9204	2.7895	2.81873	2.82486	3.24541	3.0312	2.91516	3.04296	3.02149	2.9163	2.86082
Olfr473	4.00848	3.89617	4.21332	3.90747	3.81158	4.01761	4.12955	4.01478	4.02746	3.89441	3.80427	4.62073	4.05746	3.80558	3.98234	3.87229	4.01782	4.03334	3.94744	4.38085	3.86252	4.41799	3.81815	3.57808	3.72225	3.79552	3.76065	3.84291	3.90073	3.98113	3.77804	3.75462	3.74582	4.39857	3.93783	4.00134	4.00003	4.32812	4.22549	4.08409
Olfr474	3.31693	3.3113	3.19576	3.28339	3.4217	3.42704	3.39056	3.19676	3.15079	3.25848	3.3113	3.80222	3.13616	3.23841	3.07588	3.61341	3.34667	3.33146	3.22628	3.64191	3.11186	4.05574	3.2615	3.05001	3.19513	3.39959	3.3542	3.36213	3.79068	3.3113	3.29523	3.18677	3.24606	3.73498	3.57485	3.25989	3.17562	3.2985	3.27744	3.16445
Olfr476	4.3691	4.50284	4.68843	4.53682	4.36858	4.54487	4.23285	4.40973	4.01306	4.17722	4.16863	4.77702	4.38485	3.88195	4.33386	4.50871	3.91625	5.09012	4.2738	4.68916	4.40899	4.43773	4.3499	4.30276	4.27033	4.43638	4.66766	4.26894	4.48216	4.21803	4.37808	4.40661	4.44102	4.40104	4.79278	4.96281	4.85251	4.25499	4.63058	4.10752
Olfr477	5.27671	5.34818	5.4315	5.23709	5.23248	5.11975	5.36546	5.0773	4.94896	5.33798	5.20676	5.97828	4.87284	5.00185	5.2723	5.03114	5.03298	4.71021	5.45723	5.37602	4.78843	4.87008	5.08168	5.00264	5.01261	5.24338	4.93266	5.06974	5.09131	5.26202	4.90734	4.99539	5.04914	5.42553	5.03467	5.30539	5.09952	5.13949	5.29936	4.94331
Olfr478	3.97177	3.95592	4.15313	3.95592	3.94122	4.00005	3.66718	3.78547	3.86183	4.06827	3.83895	3.72285	3.73124	3.97593	3.84432	4.15979	3.84406	4.51077	3.90236	4.35217	4.06421	4.16746	3.68088	3.73307	3.68622	4.10984	3.95592	3.71778	3.84776	4.00667	3.82936	4.10814	3.75973	4.34023	4.44965	4.16084	4.23426	4.20869	3.91481	3.82879
Olfr479	5.58507	5.18079	5.53977	5.29171	5.24912	5.21138	5.56157	5.80602	5.29295	5.72909	5.60456	5.86655	5.01621	5.14527	5.43527	5.01684	5.26915	6.10397	5.32542	5.14176	4.87737	5.81814	5.41101	4.99843	5.2353	5.17575	4.92153	5.12737	5.13662	5.20189	5.19805	5.01086	5.02307	5.30952	4.79874	5.28748	4.94774	5.08541	5.44342	5.35032
Olfr48	5.97702	6.39317	6.27586	5.97648	6.05855	6.03389	5.69576	5.94369	5.81708	5.82488	6.04249	5.89879	5.88202	5.63461	5.75395	6.11426	6.18082	5.70662	5.94065	5.8397	6.0676	6.07199	6.19107	5.93873	6.20958	6.63447	5.63515	6.12525	5.99358	6.49291	6.24713	6.44446	6.14173	6.44655	6.12838	6.376	6.22232	6.57296	6.43281	5.93189
Olfr480	3.23132	3.04283	3.34468	3.0777	3.1152	3.10029	3.0775	3.05816	2.9913	3.16026	3.03902	3.34126	3.41696	3.5014	3.20084	3.46721	3.26537	3.18331	3.31119	3.54542	3.29004	3.87213	3.30934	3.0531	3.14315	3.13034	3.05783	3.0611	3.04652	3.15011	3.17398	3.3286	3.02513	3.74954	3.30868	3.24435	3.26876	3.27739	3.27609	3.13182
Olfr481	4.55601	4.63426	4.609	4.40483	4.37249	4.24754	4.26677	4.19737	4.42543	4.30216	4.34289	4.05462	4.58642	4.10603	4.59257	4.4253	4.62155	4.19629	4.23565	4.51612	4.22885	4.36846	4.28436	4.65856	4.28908	4.45203	4.22684	4.39084	4.2588	4.50128	4.39109	4.42543	4.46473	4.86106	4.44786	4.61798	4.51359	4.63357	4.50442	4.47177
Olfr482	4.25156	4.20857	4.42406	4.33657	4.32234	4.10672	4.53261	4.50119	5.12008	4.86086	4.58427	4.85665	4.17998	3.91638	3.48289	4.43439	4.32221	4.15618	4.06561	4.68105	4.67699	4.92318	3.83432	3.66452	3.77495	4.19727	3.91836	3.85979	4.53873	4.0993	3.99738	4.16988	4.03361	4.17255	4.45141	3.80954	4.12762	4.54926	4.22123	4.23709
Olfr483	4.6721	4.56836	4.73198	4.39895	4.65939	4.49288	4.54503	4.54349	4.60191	4.59652	4.24919	4.4596	4.42332	3.82241	4.46679	4.65877	4.60063	4.57054	4.6649	4.85393	4.31499	4.76199	4.52597	4.31212	4.34144	4.65092	4.54624	4.52623	4.69519	4.66559	4.5991	4.44955	4.46284	4.71365	4.45228	4.44894	4.9944	4.97224	4.75271	4.53128
Olfr484	4.51158	4.42452	4.35371	4.73174	4.3071	4.45646	4.57879	4.67582	4.83262	4.63429	5.01694	4.52116	4.67909	3.99012	4.26064	4.70628	4.38676	4.42517	4.47185	4.80752	4.3544	4.41362	4.343	4.14557	4.2117	4.1851	3.98807	4.27177	4.27681	4.45186	4.46066	4.36946	4.1211	4.70849	4.26713	4.18	4.18928	4.49809	4.35786	4.38676
Olfr485	5.87201	5.75298	5.81862	5.57215	5.69216	5.61763	5.47331	5.28655	6.52309	5.30217	5.45302	5.52809	5.24566	5.12286	5.0601	5.1481	4.76844	5.02232	4.69173	4.99572	4.78606	5.62257	4.79415	4.89428	5.06079	5.37294	4.97709	4.79401	5.38513	4.86643	5.2186	5.20347	4.99987	6.47152	5.23956	5.28002	4.95465	5.52967	5.22486	5.61234
Olfr486	4.92317	5.15233	4.63799	4.65979	4.6744	4.54671	4.44773	4.72717	4.64234	4.9704	4.64687	5.13239	4.22701	4.72146	4.68818	4.25621	4.40424	4.61264	4.82971	4.89368	4.51864	4.76418	4.28706	4.39798	4.35182	4.69997	4.44553	4.48193	4.52449	4.58156	4.53848	4.49085	4.36273	5.2396	5.10296	4.57234	4.86405	4.37332	4.65847	4.85665
Olfr487	4.92317	5.15233	4.63799	4.65979	4.6744	4.54671	4.44773	4.72717	4.64234	4.9704	4.64687	5.13239	4.22701	4.72146	4.68818	4.25621	4.40424	4.61264	4.82971	4.89368	4.51864	4.76418	4.28706	4.39798	4.35182	4.69997	4.44553	4.48193	4.52449	4.58156	4.53848	4.49085	4.36273	5.2396	5.10296	4.57234	4.86405	4.37332	4.65847	4.85665
Olfr488	4.49634	4.5298	4.18671	4.46524	4.35136	4.24992	3.98674	4.31226	4.35784	4.50774	4.05784	5.12518	3.82076	3.69023	3.5665	3.8661	3.96364	3.89044	3.89827	3.98661	3.89712	4.09474	3.64108	3.83407	3.79021	4.18591	4.044	4.11595	4.19397	4.07233	3.83515	3.96415	4.03429	4.44053	3.87867	4.09002	4.43516	3.96135	4.31676	3.97573
Olfr49	4.42372	4.5284	4.57831	4.06289	4.25504	4.06929	4.23997	4.80015	4.24262	4.63525	4.68878	5.1806	4.2824	4.30232	4.29187	4.27314	4.25532	4.06591	4.02227	4.58525	4.22696	4.52287	4.12055	4.17046	4.07288	4.27338	4.39639	4.23089	4.12838	4.45414	4.27409	4.24758	4.14279	4.38235	4.45117	4.42054	4.51457	4.45426	4.77319	4.66939
Olfr490	3.49019	3.13862	3.13457	3.03777	3.04984	3.02506	3.71163	3.8901	3.80059	3.97138	3.37424	5.8017	2.92872	3.46094	3.35331	3.31885	3.87865	3.72946	3.5412	3.59879	2.89604	3.62591	2.88389	2.87468	2.95284	3.28874	3.11396	3.16954	3.01241	2.89411	3.0638	2.86833	2.95322	3.57226	3.22404	2.95769	3.11858	3.07235	2.91461	3.11911
Olfr491	4.45718	4.64887	4.61953	4.56917	4.51929	4.35751	4.3184	4.35412	4.54919	4.52338	4.47934	4.79799	4.7477	4.75983	4.37304	4.46226	4.56985	4.44011	4.72065	4.31428	4.54463	4.50406	4.45297	4.23757	4.35985	4.81093	4.41992	4.76047	4.40355	4.27296	4.29373	4.25566	4.32579	4.86638	4.49002	4.64903	4.64303	4.62845	4.57274	4.32507
Olfr492	4.79391	4.4846	4.28901	4.43307	4.33699	4.24793	4.13388	4.26525	5.04442	4.39638	4.11874	4.67576	3.79193	3.91715	4.0877	4.20627	4.10492	4.35544	3.95357	4.09729	4.00949	4.5229	3.87415	3.9233	3.71943	3.96352	4.11132	4.18499	4.02551	4.38045	4.00898	3.93239	4.03249	4.10559	4.49033	3.86147	4.59063	4.37526	4.34796	3.96729
Olfr493	4.17109	4.14655	3.95407	3.82803	3.7252	4.09184	3.47943	3.57886	3.76744	3.68297	3.76641	4.07876	3.83234	3.79718	3.73588	3.83701	3.84125	3.18527	3.79928	4.03622	3.62602	3.67054	3.82588	3.7096	3.52201	3.57652	3.86201	3.84879	4.24358	3.63121	3.70167	4.01061	3.54395	4.63087	4.48949	4.05623	3.84879	4.11687	3.74204	3.61177
Olfr494	4.66361	4.34613	4.45345	4.38353	4.26915	4.2475	4.50286	4.7304	5.09289	4.88717	4.35888	5.00916	4.36647	4.17093	3.96326	4.73542	4.34227	4.31291	4.17647	4.49864	4.43873	4.49774	4.4916	3.90603	4.22183	4.65963	3.97747	4.31586	4.43223	4.36327	4.4718	4.38572	4.2388	4.82331	4.16006	4.51851	4.41406	4.61251	4.28363	4.41583
Olfr495	3.86294	4.10442	4.11372	4.1085	3.80656	3.90302	3.84009	4.21366	4.0387	4.59752	4.46412	5.54172	3.55565	4.14926	4.27585	4.4269	4.87947	4.245	3.9857	4.18413	3.98356	4.2973	3.90666	3.89918	3.78771	3.5406	4.32201	3.78531	4.0543	3.58372	4.4458	4.19533	3.82305	4.6573	3.93857	4.09165	4.27984	3.76887	3.76052	4.49681
Olfr497	4.21189	3.91492	3.89152	4.16799	4.20283	4.10052	3.90068	4.29115	4.43548	4.62042	4.46975	4.60142	3.90919	3.57747	4.05585	3.88013	3.79362	4.34621	3.96653	4.0827	3.93159	4.20018	3.5906	3.62528	3.5499	3.66541	3.8608	3.88744	4.58091	4.00007	4.11318	3.84088	3.91188	4.07128	4.43596	4.13777	4.05652	3.83856	3.72765	4.02372
Olfr498	4.34812	4.37939	4.05815	4.0393	3.78849	3.89102	3.69741	3.80325	4.06987	3.99744	3.80104	4.21904	4.20002	4.10388	3.71877	4.23818	4.08218	4.31924	3.85278	4.02392	3.73422	4.47094	3.83429	3.7589	3.65109	3.73558	4.04339	3.65828	4.21704	3.88061	3.81243	3.8602	3.62279	4.31638	3.79876	4.01328	4.07419	4.07663	3.8168	3.9021
Olfr5	5.24569	5.23323	5.40062	5.36428	5.10082	5.09135	5.23387	5.09534	4.74568	4.85907	5.02986	4.88628	4.84401	5.29586	5.1647	4.65821	5.43177	5.16989	5.08744	5.08703	4.83049	5.0154	5.28131	5.15217	5.12233	5.62607	5.28109	5.75731	5.13641	5.39011	5.38803	5.32285	5.37323	5.49234	5.49432	5.59388	5.2388	5.89986	5.3113	5.34074
Olfr50	3.62626	3.55389	3.66491	3.39654	3.58779	3.38924	4.05646	3.76361	4.45805	3.97737	3.80871	5.08265	4.00232	3.789	3.98859	3.88652	3.54214	3.92731	3.848	4.04502	4.13004	4.23726	3.40461	3.50687	3.81411	3.63077	3.87358	3.67692	4.31802	4.20758	3.81116	3.84391	4.13262	3.42647	3.34527	3.5754	3.78468	4.42706	3.88913	4.37448
Olfr502	4.20474	4.54519	4.30744	4.34396	4.41032	4.50117	4.41202	4.01352	4.20454	4.19104	4.16863	4.35098	4.30027	4.42674	4.59622	4.40566	4.71331	4.62737	4.30292	4.22904	4.22184	4.91653	4.30744	4.20658	4.20785	4.81882	4.2305	4.13838	4.29124	4.32268	4.07622	4.197	4.06051	4.36037	3.83426	4.34662	4.42858	4.32147	4.68452	4.22952
Olfr503	4.81344	4.96537	4.99329	4.91153	4.76833	4.89393	4.78755	5.00694	4.86469	5.05114	4.93579	5.35827	4.90373	4.71394	4.91021	4.89225	4.81437	4.71789	4.77665	4.75846	5.04765	4.81195	4.76907	4.90798	5.00513	5.8551	5.28042	5.20542	5.29074	5.22528	4.96877	4.89187	5.09099	5.6047	5.03992	5.4821	5.17859	5.21686	5.32233	5.28706
Olfr504	3.60114	3.76188	3.83434	3.56371	3.73302	3.7162	4.28548	4.3662	4.53876	4.24645	4.4415	5.32075	3.71682	3.77076	4.14116	4.11553	4.34051	4.55205	3.98581	4.12251	4.21043	4.28131	3.68981	3.56964	3.69649	3.64748	3.67288	3.64695	4.28501	3.80608	3.73808	3.89983	3.69044	4.61155	3.6728	4.12381	3.88201	4.1328	3.80828	3.79145
Olfr506	4.25156	4.20857	4.42406	4.33657	4.32234	4.10672	4.53261	4.50119	5.12008	4.86086	4.58427	4.85665	4.17998	3.91638	3.48289	4.43439	4.32221	4.15618	4.06561	4.68105	4.67699	4.92318	3.83432	3.66452	3.77495	4.19727	3.91836	3.85979	4.53873	4.0993	3.99738	4.16988	4.03361	4.17255	4.45141	3.80954	4.12762	4.54926	4.22123	4.23709
Olfr507	4.25156	4.20857	4.42406	4.33657	4.32234	4.10672	4.53261	4.50119	5.12008	4.86086	4.58427	4.85665	4.17998	3.91638	3.48289	4.43439	4.32221	4.15618	4.06561	4.68105	4.67699	4.92318	3.83432	3.66452	3.77495	4.19727	3.91836	3.85979	4.53873	4.0993	3.99738	4.16988	4.03361	4.17255	4.45141	3.80954	4.12762	4.54926	4.22123	4.23709
Olfr508	4.13306	4.07064	4.10524	4.06353	4.05931	4.00801	4.28597	4.33719	3.90463	4.27071	3.74254	4.22928	4.05947	4.40122	3.92549	4.39504	3.59696	4.54572	3.98596	4.64937	4.46969	4.63868	4.06627	3.99916	4.02367	4.71046	4.26437	4.46482	4.48701	4.01638	4.05947	4.27071	4.23492	4.45763	4.29073	4.67319	4.21007	5.03591	4.49584	4.79361
Olfr509	3.46548	3.56064	3.38632	3.57248	3.30609	3.57423	3.69334	3.89046	4.02976	4.75408	3.79408	5.25804	3.24883	4.04618	3.64948	3.3355	4.08584	4.04548	3.7806	4.14745	3.55635	4.27581	3.52753	3.65212	3.28794	3.50112	3.43327	3.55197	3.6404	3.56006	3.30232	3.47095	3.41059	3.65493	4.229	3.44424	3.75619	3.71769	4.02525	3.84496
Olfr51	6.44111	5.71121	6.03533	5.96746	5.90511	5.73445	5.1786	5.03807	4.96298	5.48388	5.07854	4.82243	5.16694	4.97904	5.43627	5.36155	5.19043	5.77584	5.16162	5.5177	5.64519	5.68674	5.29042	5.23108	4.99392	5.2169	5.09137	5.24698	5.29349	5.3813	5.28849	5.56367	5.00331	5.5051	5.75392	4.85479	5.52697	5.88128	5.36606	4.8735
Olfr510	4.21618	3.74418	3.86336	4.36068	4.13179	4.02323	3.67781	3.75606	3.68748	3.9668	3.90009	4.48928	3.62858	3.93378	4.12904	3.75802	3.63185	3.7751	3.81684	4.1508	4.33075	4.79651	3.81662	3.86368	3.68474	3.74334	3.82819	3.68656	3.89591	4.11771	3.49192	3.68306	3.79544	4.22245	4.62706	4.11292	3.77276	4.25705	3.61867	3.55174
Olfr512	3.1712	3.1182	3.43434	3.3062	3.17763	3.38884	3.37701	3.89907	3.75356	3.75692	3.97292	4.55996	3.30861	3.21578	3.3268	3.85552	3.57464	3.98962	4.0577	3.69248	3.51162	4.0213	3.18189	3.16119	3.24519	3.24373	3.4539	3.29348	3.29113	3.43155	3.4539	3.28684	3.47235	3.76525	4.10633	3.36049	3.65079	3.77957	3.24535	3.74202
Olfr513	5.08672	4.86789	5.22718	5.10633	4.99953	4.91778	5.34433	5.20404	5.33528	5.51949	5.32359	5.89185	4.77885	5.26026	4.80644	5.13182	5.19019	5.60512	5.18801	5.54761	5.42531	5.51135	5.02331	4.63113	4.68615	5.17412	4.67821	5.1436	4.9281	5.27461	5.10021	4.96922	5.12994	4.9719	4.67085	5.03444	5.15346	5.43456	5.33499	5.04893
Olfr514	5.30876	5.18659	5.06079	4.96383	4.983	5.00323	5.67922	5.25501	5.61172	5.54593	5.65711	5.66153	5.10673	4.98189	5.19559	5.6883	5.02033	5.02223	5.25501	5.27854	5.18987	5.43472	4.99529	4.89259	4.87612	5.45521	5.08419	5.37342	5.40093	5.34397	5.19397	5.27809	5.25501	4.74584	5.82804	5.25661	5.78608	5.08671	5.25501	5.08036
Olfr516	3.57721	3.32534	3.25398	3.5264	3.23362	3.039	3.42619	3.01234	3.69639	3.53667	3.46144	4.5739	3.46068	3.84769	3.52054	3.69995	3.69371	3.52922	3.15524	3.80647	3.19908	3.63575	3.28491	3.12028	3.20731	3.67161	3.50544	3.2183	3.92571	3.70868	3.34421	3.48706	3.3451	3.36087	4.49126	3.42453	3.52988	4.17744	3.39197	3.81183
Olfr517	4.66636	4.60493	4.80044	4.61355	4.19994	4.41107	4.59036	5.03547	4.80339	4.95446	4.89509	4.75047	4.82105	4.54316	4.75603	5.25101	4.77391	5.12625	5.04775	4.40365	4.73497	4.73867	4.68765	4.91048	4.49379	4.78658	4.79533	4.72707	4.74392	4.52863	4.37379	5.08241	4.84964	5.37996	5.4068	5.03319	4.74333	5.23943	4.8804	4.72934
Olfr518	4.2332	4.26125	4.39707	4.0503	3.75539	3.98081	4.29173	4.18949	5.13855	4.29098	4.61019	5.64902	3.68335	3.74685	3.80347	3.95582	4.28473	3.99035	3.97039	4.44798	3.92957	3.94917	3.73817	3.75119	3.78327	4.35133	3.83099	4.01875	4.08839	4.14562	3.88361	3.77621	3.88587	4.29668	3.84792	4.05055	3.68202	4.07633	4.20325	3.86191
Olfr519	4.2332	4.26125	4.39707	4.0503	3.75539	3.98081	4.29173	4.18949	5.13855	4.29098	4.61019	5.64902	3.68335	3.74685	3.80347	3.95582	4.28473	3.99035	3.97039	4.44798	3.92957	3.94917	3.73817	3.75119	3.78327	4.35133	3.83099	4.01875	4.08839	4.14562	3.88361	3.77621	3.88587	4.29668	3.84792	4.05055	3.68202	4.07633	4.20325	3.86191
Olfr52	4.94525	4.75182	4.67843	4.83022	4.73651	4.78706	4.81207	4.39696	4.41138	4.67037	4.57732	4.47595	4.36824	4.65088	4.3835	4.94641	4.39397	4.66447	4.78658	4.99328	5.09431	5.53331	4.58235	4.56946	4.53391	4.89747	4.4027	4.71572	4.65013	4.93415	4.68723	4.71037	4.65516	5.65659	4.92241	5.03158	4.42187	5.04922	4.77876	4.60552
Olfr520	4.60502	4.73786	4.80642	4.51497	4.69075	4.52696	4.62745	4.72964	4.63969	4.81247	4.81247	4.7663	4.7321	4.51904	4.48701	5.10289	4.82314	4.92228	4.7964	5.04693	4.86881	4.6377	4.79926	4.61122	4.65142	5.14099	4.71388	4.58753	4.89324	5.23768	4.89601	4.94525	4.70541	5.27631	5.31849	5.08491	5.02331	5.20127	5.2734	5.16356
Olfr521	4.4777	4.6359	4.21898	4.17697	3.7942	4.02476	4.04623	3.877	3.85897	4.57806	4.13733	4.85464	4.48153	4.1395	4.17232	4.54542	4.21436	4.20752	3.90109	5.09215	4.92391	4.99082	4.32965	3.8889	4.0459	4.97806	4.61272	4.36878	4.36512	3.82951	3.84442	4.04149	4.34525	4.28657	4.68173	4.15282	4.76624	5.52505	4.56168	4.84014
Olfr522	6.24136	5.75489	5.97308	5.8091	5.91291	5.74815	6.06169	6.02621	5.96679	5.94286	5.9932	5.83266	6.01108	5.98136	5.66638	5.86981	5.96683	6.29553	5.61248	6.15693	5.27091	5.78135	6.21697	5.88157	5.94046	6.22701	6.00407	5.99935	5.88118	6.53719	5.905	5.88377	6.07251	6.15338	5.85268	6.37155	6.2706	6.15595	6.4209	5.94774
Olfr523	5.76939	5.95343	5.86226	5.81616	5.68904	5.85145	5.71247	6.04707	5.85403	5.64139	5.89308	5.68684	5.65638	5.62923	5.3732	5.82251	5.77475	5.47684	5.55987	5.45677	5.20042	5.12748	5.62225	5.49473	5.67405	5.98585	5.78277	6.03088	5.60369	6.00224	5.76648	5.76819	5.73973	5.35626	6.00334	6.1514	5.92423	6.38196	6.15365	5.95107
Olfr524	6.72971	6.63465	6.71371	6.75843	6.72397	6.59518	6.53938	6.66125	6.05497	6.30297	6.31443	6.52197	6.79842	6.82517	6.80957	6.52285	6.75076	6.47998	6.56824	6.95905	6.53835	6.71617	6.90629	6.4704	6.74372	7.56098	6.70895	6.72954	6.76436	7.23087	6.62963	6.76943	6.85701	6.81914	6.75076	7.22777	6.99065	7.02242	7.479	7.14229
Olfr525	4.70318	4.7609	4.92229	4.94033	4.70781	4.84623	5.12629	4.90532	5.16024	4.99145	5.39238	5.56758	4.85133	4.67402	4.71019	4.4875	4.92276	4.81116	4.78115	5.02399	5.0312	5.06797	4.86359	4.7504	4.80577	5.01563	4.55276	4.97542	5.02668	4.9302	4.94033	4.89012	4.57527	5.40506	4.74654	5.00741	5.20816	5.35362	5.2333	5.19701
Olfr527	5.27714	5.22696	5.00843	5.48144	5.30484	5.14065	4.83481	5.11551	4.57104	4.45141	5.11596	4.56115	5.48218	5.25949	5.2744	5.45708	5.06298	5.36007	5.49443	5.11313	5.36034	5.43569	4.98172	5.26019	5.05114	5.44531	4.68427	5.41229	5.169	5.41938	5.47138	5.38723	5.05075	5.17267	4.92349	5.6939	5.81988	5.229	5.2462	5.26129
Olfr53	5.80507	5.72915	5.42062	5.74553	5.34312	5.64449	5.66868	6.06383	5.7086	6.35277	5.62883	5.79127	5.53417	5.80266	5.12311	4.7124	5.27403	5.02538	5.05473	4.95622	5.06492	4.82295	5.06574	5.0011	5.07483	6.05626	4.93111	5.22578	5.17797	5.65383	5.10014	5.18977	5.13849	5.43955	4.94259	5.5424	5.52257	5.36988	5.73059	5.13328
Olfr530	5.82533	5.81661	5.8986	5.70935	5.65042	5.53639	5.7613	5.88635	5.88835	5.95225	5.54436	6.02622	5.48416	5.56431	5.6634	5.94546	5.53545	5.54559	5.97108	5.9834	5.37264	5.8364	5.6634	5.39347	5.46989	6.11811	5.74041	5.33145	5.5951	5.59358	5.34062	5.33095	5.74873	5.53274	5.0838	6.29957	5.87013	5.99716	6.04106	5.4288
Olfr531	4.5694	4.27753	4.48833	4.36263	4.46119	4.47489	3.82009	4.14045	3.78518	4.09876	3.75417	3.79909	4.71747	4.34876	4.45299	4.05792	4.44772	4.21156	4.78914	5.11115	4.79102	5.63011	4.49534	4.6313	4.77751	4.58254	4.0748	4.53781	4.37732	4.84462	4.68476	4.52629	4.37977	4.98389	4.8111	4.78669	4.88377	4.83485	4.96113	4.61278
Olfr532	5.1995	5.21667	5.26712	5.08516	4.99497	5.10789	5.31906	5.30512	5.06208	5.21606	5.27268	5.5686	4.90589	4.9789	4.85193	5.63774	5.49538	5.50842	5.41696	5.74737	5.07029	5.44763	5.13265	4.87017	5.10202	5.52246	5.04507	5.03858	5.13029	5.10163	5.06759	5.09738	5.24508	5.30652	5.11765	5.59138	5.25462	5.35127	5.26841	5.39056
Olfr533	5.82533	5.81661	5.8986	5.70935	5.65042	5.53639	5.7613	5.88635	5.88835	5.95225	5.54436	6.02622	5.48416	5.56431	5.6634	5.94546	5.53545	5.54559	5.97108	5.9834	5.37264	5.8364	5.6634	5.39347	5.46989	6.11811	5.74041	5.33145	5.5951	5.59358	5.34062	5.33095	5.74873	5.53274	5.0838	6.29957	5.87013	5.99716	6.04106	5.4288
Olfr535	6.62796	6.54095	6.40461	6.59199	6.52917	6.6223	6.21355	5.96815	5.83397	6.22489	6.22113	5.60154	6.17521	6.21521	6.30095	5.96148	6.11219	6.19666	5.90678	6.29628	6.06611	6.24548	6.2761	6.1385	5.94498	6.49666	6.14074	6.2714	6.3803	6.31158	5.96909	6.22362	5.97953	6.25572	6.02495	6.199	6.37979	6.73334	6.50182	6.21355
Olfr536	5.82533	5.81661	5.8986	5.70935	5.65042	5.53639	5.7613	5.88635	5.88835	5.95225	5.54436	6.02622	5.48416	5.56431	5.6634	5.94546	5.53545	5.54559	5.97108	5.9834	5.37264	5.8364	5.6634	5.39347	5.46989	6.11811	5.74041	5.33145	5.5951	5.59358	5.34062	5.33095	5.74873	5.53274	5.0838	6.29957	5.87013	5.99716	6.04106	5.4288
Olfr538	5.80507	5.72915	5.42062	5.74553	5.34312	5.64449	5.66868	6.06383	5.7086	6.35277	5.62883	5.79127	5.53417	5.80266	5.12311	4.7124	5.27403	5.02538	5.05473	4.95622	5.06492	4.82295	5.06574	5.0011	5.07483	6.05626	4.93111	5.22578	5.17797	5.65383	5.10014	5.18977	5.13849	5.43955	4.94259	5.5424	5.52257	5.36988	5.73059	5.13328
Olfr539	5.80507	5.72915	5.42062	5.74553	5.34312	5.64449	5.66868	6.06383	5.7086	6.35277	5.62883	5.79127	5.53417	5.80266	5.12311	4.7124	5.27403	5.02538	5.05473	4.95622	5.06492	4.82295	5.06574	5.0011	5.07483	6.05626	4.93111	5.22578	5.17797	5.65383	5.10014	5.18977	5.13849	5.43955	4.94259	5.5424	5.52257	5.36988	5.73059	5.13328
Olfr54	6.40302	6.39185	6.5849	6.52038	6.29206	6.32076	6.97665	6.72477	7.04209	6.39172	6.38289	7.12222	6.39247	6.27886	5.88811	6.3679	6.65212	6.38029	6.23535	6.23405	6.33412	6.33803	6.47394	6.07706	6.18519	6.82612	6.26115	6.58913	6.21007	6.69718	6.45896	6.42653	6.42082	6.84962	6.47371	6.73503	6.65507	6.58419	7.02543	6.39378
Olfr541	5.80507	5.72915	5.42062	5.74553	5.34312	5.64449	5.66868	6.06383	5.7086	6.35277	5.62883	5.79127	5.53417	5.80266	5.12311	4.7124	5.27403	5.02538	5.05473	4.95622	5.06492	4.82295	5.06574	5.0011	5.07483	6.05626	4.93111	5.22578	5.17797	5.65383	5.10014	5.18977	5.13849	5.43955	4.94259	5.5424	5.52257	5.36988	5.73059	5.13328
Olfr543	6.3459	6.41344	6.02867	6.12126	6.15905	6.04136	6.11672	5.9749	6.14238	6.42949	6.09838	5.75598	6.22074	5.76555	5.97399	5.99665	5.75456	5.99018	5.53715	6.02351	5.77347	6.32271	6.30758	6.2592	6.14341	6.20323	5.88246	5.9273	6.28441	6.28485	6.12436	6.18396	6.08695	6.19215	5.73075	6.36374	6.63964	6.65042	6.37675	5.96832
Olfr544	4.56454	4.3665	4.51321	4.54877	4.35685	4.41319	4.56151	4.45394	4.10572	4.39221	4.40496	4.17622	4.85245	4.42106	5.07365	4.6123	4.30582	4.76574	4.95073	4.64527	4.83932	4.80173	4.8161	4.54654	4.63766	4.6468	4.83663	4.90162	4.57865	4.78068	4.65368	4.81626	4.52826	4.22757	4.29266	4.9729	4.57506	5.44888	5.25726	5.39372
Olfr545	6.42004	6.66375	6.71462	6.63528	6.49314	6.62688	6.4391	6.20388	6.4282	6.24164	6.31529	6.08666	6.38215	6.62742	6.35917	6.56282	6.67652	6.80156	6.57546	6.10575	6.50615	6.16265	6.35438	6.59313	6.60188	6.80174	6.56145	6.6757	6.61101	6.96245	6.48994	6.56282	6.51487	7.24397	6.63245	6.60109	7.0553	7.47986	6.77952	6.985
Olfr547	4.17122	4.31499	4.05328	4.19826	4.24545	4.09165	4.40438	4.25121	4.31918	4.14651	4.24817	4.44402	4.28106	4.23043	4.32504	4.20061	4.25484	4.42044	4.2692	4.83853	4.24132	4.26041	4.15768	4.43328	4.06485	4.73082	4.21291	3.98106	4.97077	4.16516	4.09107	4.32504	3.91653	4.75223	5.01053	4.05631	4.66769	4.46542	4.30828	4.80149
Olfr549	5.61064	5.71298	5.69274	5.64886	5.38299	5.46927	5.75598	5.98594	5.79794	5.71319	5.57288	6.28715	5.68856	5.21696	5.2472	5.71453	5.9179	5.71453	5.32547	5.77163	5.71248	5.42172	5.39925	5.35088	5.4441	5.8962	5.38288	5.67431	5.75856	5.90301	5.68078	5.55735	5.4243	5.87334	5.68821	5.71453	6.21591	5.73173	5.79466	5.64616
Olfr55	5.43328	5.4623	5.29959	5.20292	5.28344	5.35275	6.74887	6.36435	6.1792	6.48916	6.46919	7.48417	4.87417	5.1914	5.55413	5.0135	4.78193	5.69845	4.73902	5.15135	5.77582	5.13574	5.62896	5.13437	5.55095	6.2209	5.69167	5.86489	5.70391	5.51316	5.48563	5.77707	5.33397	5.43697	5.66277	6.14756	5.85316	5.85956	5.9239	5.83149
Olfr550	5.84107	5.73938	5.97672	5.65186	5.80235	5.52249	5.60361	5.50325	5.59093	5.78948	5.55384	5.7202	5.74283	5.58545	5.80174	5.26817	5.79752	5.4431	5.78491	5.66449	5.789	5.6289	6.08944	5.79938	5.88287	5.96541	5.73584	5.94419	5.8012	6.08354	5.54687	5.75486	5.81866	6.3245	5.93438	6.34146	6.30963	6.13907	6.13168	6.09161
Olfr551	4.79542	4.78457	4.92805	4.90354	4.72554	4.66462	4.53003	4.62095	4.40939	4.27279	4.13572	4.29921	4.45652	4.6877	4.59985	4.87298	4.82513	4.51727	4.7394	4.77796	4.72618	4.70207	4.72362	4.7554	4.73336	4.98773	4.67086	4.76363	4.56197	5.11183	4.6667	4.7645	4.41546	4.90342	4.73606	5.12639	5.32174	5.11858	4.85004	5.24735
Olfr552	4.91132	4.70781	4.83326	4.91652	4.62469	4.86109	4.83151	4.85879	4.6335	4.76993	4.95736	5.10314	5.18477	5.07316	4.7692	4.7832	4.70298	5.23832	5.36772	4.52727	4.60143	5.00795	4.99024	4.95879	4.89531	4.78056	4.89133	4.70203	5.11091	5.27317	4.6849	4.86109	4.8642	5.02952	4.86109	5.04166	4.69079	4.74753	4.92854	4.52176
Olfr553	4.77984	4.77672	4.85432	4.70907	4.76874	4.74467	4.52587	4.69995	4.39884	4.47578	4.41738	4.26803	4.48712	4.64118	4.38901	4.43259	4.59562	4.51402	4.45773	4.43618	4.61235	4.34648	4.53743	4.30016	4.59861	4.53095	4.49737	4.42984	4.62515	4.82775	4.59719	4.50652	4.7334	4.34466	4.48163	4.74159	4.55738	4.78604	4.65575	4.55668
Olfr554	5.13898	5.2443	4.79946	4.95332	4.98433	4.80077	4.60854	4.65481	4.8255	4.95533	4.8255	4.46935	4.64604	4.71318	4.80273	4.53369	4.51947	4.81702	4.60975	4.65716	4.54792	4.80022	4.77712	4.7849	4.94107	5.04968	4.50127	4.88248	5.12092	5.01872	4.7849	5.04521	4.67403	5.23512	4.72234	5.34701	4.94646	5.22108	5.15777	4.55388
Olfr555	5.17935	5.28215	5.19378	5.08428	5.06195	4.85864	4.95243	4.99189	4.51927	4.66626	4.53192	4.79034	4.83014	5.40181	5.20032	5.0491	5.0386	5.23911	5.36006	5.27593	5.32857	5.67537	4.72771	4.82546	4.66363	4.91792	4.4535	4.9426	5.11498	4.88892	4.90717	4.89936	4.84358	5.32857	5.12277	5.15072	5.11994	5.19087	4.82214	5.05843
Olfr556	4.80894	4.77797	4.7488	4.69019	4.66504	4.56074	4.75584	4.38077	4.4835	4.7523	4.79616	4.51004	4.59168	4.49997	4.63624	4.67568	4.5473	4.58166	4.27923	4.79662	4.52068	4.88554	4.598	4.5216	4.38102	4.77479	4.50008	4.81934	4.48593	4.86065	4.66878	4.65001	4.44632	5.04726	4.66878	4.81823	5.0121	4.75743	4.73396	4.66803
Olfr557	4.70339	4.39132	4.48701	4.583	4.26161	4.46019	4.36232	4.50403	4.42421	4.49624	4.24505	5.09357	4.2592	4.55915	4.33483	4.53006	4.33302	4.81008	4.62334	4.37037	4.25176	4.48701	4.34568	4.22669	4.60994	4.90563	4.45644	4.67768	4.49624	4.64241	4.55763	4.30359	4.32962	5.36814	5.07895	4.78179	4.60692	4.88863	4.73419	4.76075
Olfr558	5.30121	5.32488	5.29891	5.3367	5.18705	5.2726	5.2296	4.92944	4.78334	5.15277	4.92763	5.01667	4.66519	4.77081	4.78654	5.0905	5.27494	4.91516	5.28018	5.21992	4.76109	5.24418	5.09416	5.05417	5.21758	5.05577	5.10107	4.95794	4.85109	5.45986	5.10685	4.7819	4.92812	4.92814	5.06259	5.58812	5.15879	5.56712	5.3927	4.8735
Olfr559	4.4608	4.63428	4.4907	4.35776	4.39211	4.18362	4.82928	4.62325	5.93814	5.08681	4.75659	6.39356	3.83108	3.84964	3.788	4.05744	4.55629	4.78944	3.9388	4.47358	4.36134	4.62133	4.01938	3.78983	3.77087	3.93531	4.0121	3.99188	3.97425	3.97785	3.89625	4.35906	4.09219	5.11094	3.96055	3.95929	4.12712	5.32914	4.43793	4.2258
Olfr56	8.32185	9.3517	6.44405	6.01547	5.95121	5.68473	6.31623	5.80078	5.93383	6.57221	6.39474	6.87007	5.88865	6.07836	6.0061	8.969	8.80441	9.00688	9.11263	7.37432	6.47343	7.10852	4.95828	5.18183	5.25687	5.50538	6.70938	6.43422	7.2319	6.71481	7.42029	6.9006	7.02017	6.83725	7.46714	5.56486	6.1693	5.15305	4.48067	4.70745
Olfr560	3.7861	3.7563	3.76624	3.74355	3.68501	3.64408	3.61593	3.80391	3.71796	3.62772	3.75107	3.77966	3.60035	3.57886	3.66536	3.59816	3.67855	4.02369	3.89944	4.08966	3.73082	4.20897	3.58469	3.73159	3.72941	3.91177	3.72393	3.91239	3.96249	3.74509	3.75014	3.61901	3.72951	4.32478	3.97651	3.89078	4.0419	4.21372	4.14363	3.9234
Olfr561	4.3913	4.22246	4.45589	4.36414	4.28175	4.06581	3.93587	3.88803	3.82511	3.76606	4.00027	4.1076	3.90592	4.09108	4.05642	3.94316	4.16966	4.49572	4.26749	4.42783	3.86749	4.01563	4.02308	3.80653	3.88009	4.56432	3.96829	4.15197	4.13981	4.06084	4.07301	4.19317	4.04047	4.00384	4.1633	4.11903	4.16464	4.44162	4.27245	4.04279
Olfr564	3.69693	3.63657	3.79235	3.79963	3.61695	3.60583	4.02812	4.05247	4.17987	3.98695	3.86036	4.51	3.67143	3.68406	4.12014	3.50082	3.76481	4.07307	3.79052	3.72637	3.70287	3.11608	3.64286	3.58446	3.57429	3.5406	3.70323	3.57767	4.30204	3.60496	3.50061	3.53023	3.50917	3.78446	4.37242	3.94085	3.69435	3.91797	4.20525	3.54367
Olfr566	5.84484	6.11217	5.96014	5.91092	5.7385	5.60594	6.29649	7.0506	6.49599	6.25752	6.88299	6.49816	6.1392	6.23811	5.57878	6.11861	5.90016	5.78024	5.95327	6.27994	6.10099	6.8821	4.92417	5.2859	5.37938	5.93152	5.69746	5.80779	6.55487	6.14622	5.80819	6.16145	6.30175	6.97381	6.72562	6.09791	6.73638	7.06149	5.88904	6.05997
Olfr568	4.63192	4.37512	4.74785	4.83206	4.73026	4.61609	4.45803	4.33788	4.25877	4.37175	4.64164	4.23604	4.42045	4.3796	4.51064	4.42809	4.51653	4.09189	4.44328	4.8316	4.54261	5.09914	4.32374	4.40266	4.32267	4.66487	4.34171	4.73594	4.30676	4.82054	4.26834	4.44105	4.33257	4.90726	5.04762	4.46798	4.65834	4.60266	4.85925	4.47104
Olfr569	4.56911	4.71481	4.43175	4.45705	4.61067	4.78088	4.80899	4.71791	4.87177	4.62156	4.71481	5.56954	4.31976	4.67298	4.31836	5.16368	5.03504	4.60818	4.48256	4.96374	4.52743	4.72675	4.54163	4.28271	4.50655	5.0259	4.36444	4.68494	4.71481	5.00534	4.56187	4.32676	4.37254	4.97501	4.93631	4.70123	5.39646	4.91013	4.73584	4.90053
Olfr57	3.70231	3.4346	4.13223	3.5801	3.49083	3.61958	3.79169	3.64183	4.59519	4.63732	4.72437	5.87073	3.79435	3.62667	3.77669	3.4579	4.56425	3.62959	3.58042	4.81273	4.19215	4.83928	3.33494	3.28106	3.28487	3.79288	3.20362	3.77012	3.88109	3.42867	3.27436	3.78672	3.46423	4.25167	3.5778	3.70624	3.82676	4.02122	3.82933	3.49692
Olfr570	4.00427	4.11886	4.08832	4.12152	4.04615	3.94321	4.13916	3.83285	3.82463	3.8868	3.85027	4.01815	3.93406	4.28721	4.04635	4.12041	4.44701	3.97451	3.8439	3.91008	3.74568	4.28062	3.89692	3.99187	3.86658	3.98357	3.6721	3.90837	4.23026	4.36274	4.01617	4.23146	3.92088	4.13759	4.12188	4.13013	4.45481	4.12464	4.0324	3.95499
Olfr571	5.44673	5.43781	5.34809	5.24248	5.06779	4.9583	4.8826	4.98031	4.90925	5.04298	5.03374	5.22478	4.90767	4.47039	4.65058	5.2727	5.38298	4.74048	4.97041	5.00833	4.97128	4.91082	4.95319	4.8493	4.7688	5.72803	5.04298	5.16834	5.30555	5.3496	4.98651	5.48313	5.11606	5.05781	4.81108	5.68627	5.27798	5.04283	5.24274	4.91403
Olfr572	4.93898	4.73929	4.82631	4.83843	4.83946	4.64158	4.89564	4.90506	5.1881	5.00394	4.90269	4.91424	5.14383	4.87466	4.59496	4.70518	5.05781	4.81462	4.625	5.01705	4.98671	4.86999	4.64062	4.4632	4.56428	4.92845	4.77526	4.86138	4.80347	5.10756	4.78128	4.80347	4.65835	5.1337	4.71853	4.88567	4.87949	4.71037	4.83145	5.08719
Olfr574	4.34821	4.53985	4.56986	4.48048	4.42179	4.19758	4.50064	4.76141	4.67092	4.74533	4.35765	5.01325	4.67462	4.31875	4.20143	4.77149	4.74674	4.61293	4.53059	4.24119	4.33378	4.39801	4.34445	4.23378	4.40508	4.35654	4.08025	4.40312	4.50041	4.48536	4.24589	4.44908	4.44183	4.20973	4.17999	4.58915	4.33952	4.02308	4.83312	4.35847
Olfr575	4.61735	4.65865	4.57199	4.4068	4.42697	4.4058	4.33619	4.41119	4.54181	4.31839	4.49863	4.66204	4.41858	4.13053	4.14482	4.89426	4.2104	4.49474	4.30997	4.78527	4.25329	4.68997	4.59366	4.5267	4.44792	4.41818	4.00405	4.26446	4.0367	4.37765	4.28963	4.47507	4.57572	4.59926	4.41173	4.6777	4.58432	4.5169	4.61645	4.4184
Olfr576	4.9442	4.82004	4.9353	4.69388	4.51852	4.6625	4.682	4.87713	4.37204	4.51496	4.6569	5.12219	4.44271	4.72772	4.91926	5.31716	5.19229	4.81313	4.53854	4.78412	4.47125	4.63237	4.51303	4.5202	4.40865	4.78786	4.58391	4.80652	5.20968	5.07662	4.68216	4.7481	5.02412	4.47485	4.45945	4.95499	5.31373	4.83931	4.77139	4.75795
Olfr577	5.0017	4.91671	4.91671	5.03289	4.91671	5.00434	4.86999	4.74595	4.88522	5.04725	4.63891	5.28206	4.80285	4.71661	4.91671	5.39563	4.5614	5.07477	4.6534	4.69977	4.79282	5.13983	4.99347	4.57319	4.86535	5.23166	5.00382	4.81918	5.07895	4.4199	4.69747	5.39528	5.34225	4.49974	5.08308	5.49275	5.38002	4.88669	5.11171	5.10951
Olfr578	3.80526	3.65007	3.7576	3.76981	3.74036	3.99565	3.674	3.8222	3.52175	3.73566	3.90469	3.69009	3.9169	3.92539	4.0364	3.90082	4.08437	3.66439	3.99916	4.11461	4.09786	4.24896	3.81244	3.62775	3.67314	3.70836	3.77942	3.84387	3.95815	3.87719	3.91628	3.63939	3.65885	4.24814	4.37446	3.75831	3.9592	4.42519	3.78229	3.94652
Olfr58	3.45145	3.3523	3.14683	3.0037	3.13247	2.97634	3.41904	3.14252	3.10506	3.06092	3.10338	4.36544	3.0169	3.32864	3.18392	3.50484	3.40433	3.98391	2.97625	4.29727	3.43948	3.8209	3.04191	2.98625	3.02617	3.29758	3.04449	3.01702	3.14302	3.19839	3.20682	3.07664	2.91961	3.74201	3.38928	3.04192	3.20022	3.10216	3.00588	3.26425
Olfr582	5.3249	5.31545	5.3836	5.27845	5.13259	5.13706	5.65014	5.82272	5.68835	5.41417	5.56654	6.06014	5.25602	4.97339	5.13023	5.09451	5.01672	4.92969	4.98774	5.48728	5.13279	5.11054	5.35241	5.07647	5.18852	5.63397	5.20452	5.42812	5.14986	5.64225	5.2188	5.34644	5.30128	5.32381	5.66248	5.80302	5.93908	5.43017	5.56081	5.31288
Olfr583	3.40846	3.74832	3.65654	3.52149	3.383	3.41964	3.71607	3.71958	3.50397	3.69341	3.54491	3.70791	3.46533	3.60284	3.52656	3.72744	3.46194	3.60516	3.84339	4.097	3.7252	4.12725	3.36692	3.4056	3.45272	3.34565	3.67906	3.27999	3.77743	3.40751	3.37213	3.31663	3.3046	4.53328	3.63111	3.6224	3.66981	3.71568	3.45466	3.48791
Olfr584	4.3605	4.33022	4.5153	4.29855	4.25193	4.29916	4.44037	4.22461	4.52637	4.45111	4.14064	4.51627	4.26894	4.07923	4.24208	4.29944	3.80721	4.25154	4.20736	4.46972	4.17349	4.55018	4.08885	4.19422	4.13429	4.21849	4.06374	4.2829	4.21467	4.21432	4.39268	4.25176	4.00166	5.19585	4.63327	4.45691	4.07198	4.65879	4.28907	4.38203
Olfr585	3.40846	3.74832	3.65654	3.52149	3.383	3.41964	3.71607	3.71958	3.50397	3.69341	3.54491	3.70791	3.46533	3.60284	3.52656	3.72744	3.46194	3.60516	3.84339	4.097	3.7252	4.12725	3.36692	3.4056	3.45272	3.34565	3.67906	3.27999	3.77743	3.40751	3.37213	3.31663	3.3046	4.53328	3.63111	3.6224	3.66981	3.71568	3.45466	3.48791
Olfr586	5.30414	4.97612	5.20755	5.03718	4.93497	4.83266	5.02668	5.03138	5.79392	5.24934	5.31689	5.49393	4.71141	5.28112	4.89173	5.23186	4.94324	4.9411	5.02678	5.15194	4.69341	4.94324	4.94324	4.82888	4.90528	4.82888	4.63915	5.10801	5.23018	4.90876	4.56751	4.69587	4.96951	5.17995	4.90932	5.29676	5.38162	5.10834	5.26636	4.83518
Olfr589	4.81919	4.65901	5.02807	4.55669	4.67283	4.62363	4.45218	4.60916	4.48077	4.60446	4.63876	5.47072	4.65139	4.81421	4.64144	4.47867	4.88679	4.2941	4.55229	5.17134	4.78849	5.21049	4.72338	4.59933	4.69479	5.15115	4.27466	4.60768	5.44382	4.57456	5.03093	4.66411	4.53852	5.45878	5.35278	4.68274	5.09563	4.80222	5.35583	4.41888
Olfr59	4.68518	4.94035	4.98479	4.75546	5.04856	4.76135	5.0757	5.58819	5.24079	5.37134	4.83941	5.88398	5.08493	5.32922	5.14247	4.62956	5.04765	5.39337	5.27313	5.32141	4.95045	5.03715	5.07166	4.69049	5.00717	5.77146	4.86454	4.64501	5.08706	5.53705	5.14561	5.18137	4.82624	5.60977	4.77157	5.1723	5.31124	4.88001	5.39762	5.19476
Olfr591	4.20232	4.79771	4.54874	4.73188	4.26729	4.21822	4.04401	3.84229	4.13047	4.04203	3.68832	4.33124	4.40418	3.81307	3.8943	4.18901	4.15696	4.77918	4.49126	4.45856	4.1526	5.29197	4.08723	3.69203	3.77836	3.8793	3.49257	4.25655	3.60368	4.12332	4.16618	4.15682	3.93617	4.32727	4.02339	4.06007	4.06466	3.66834	4.49812	4.16855
Olfr592	4.19255	4.21914	4.03519	4.17736	3.80346	3.91854	3.69133	4.05858	3.98512	3.72897	4.26119	4.72195	3.80376	3.73705	3.59357	4.12873	3.63137	4.04951	3.91854	3.89299	3.91854	4.55663	3.94705	3.67636	3.45284	3.73967	4.19843	3.91854	3.85111	3.74613	3.52999	3.84121	3.63265	4.40246	4.32637	4.11833	4.23722	4.0504	3.42733	3.81686
Olfr593	4.6176	4.56839	4.69852	4.25614	4.46114	4.36319	5.00917	4.53315	4.69571	4.63942	4.20785	5.22581	4.28381	4.573	5.04318	4.60492	4.58839	4.56746	4.29589	5.03935	4.47247	5.01997	4.31163	4.16164	4.12144	4.4299	4.60765	4.55176	4.44214	4.29589	4.30443	4.20508	4.10654	4.64965	4.49854	4.08305	4.47247	4.66396	4.3882	4.38503
Olfr594	4.55436	4.71165	4.92058	4.5642	4.57974	4.39676	5.36304	5.18728	5.96042	5.24304	5.01101	6.13689	4.72822	4.64704	4.75199	4.8508	4.56981	5.12964	4.84184	4.56663	4.40621	4.86862	4.61527	4.60124	4.48141	5.41231	4.60324	4.8359	4.58492	4.68123	4.58241	5.08187	4.82201	4.97733	4.7265	5.33295	4.77047	5.06677	5.53716	4.70464
Olfr596	4.63633	4.856	4.34389	4.79552	4.63797	4.4058	4.40771	4.27826	4.80117	4.22828	4.37536	4.4498	4.4258	4.58619	4.20479	4.54824	4.24802	4.40454	4.42967	4.2089	4.70774	4.72541	4.33276	3.83394	4.08009	4.41183	4.16655	4.29792	4.45307	4.52538	4.19089	4.34596	4.24793	4.50408	4.45274	4.15523	4.50579	4.63597	4.37247	4.60891
Olfr597	3.34981	3.25225	3.43914	3.27542	3.21522	3.36506	3.63866	3.31775	3.66726	3.3422	3.71281	2.94068	2.97018	3.45038	3.09794	3.84672	3.05086	3.18527	2.94844	3.19499	3.66678	3.67941	3.05668	2.88038	3.00683	3.43184	3.06769	3.24347	3.38957	3.43289	3.84588	3.52731	3.21054	4.18862	3.59484	3.28734	3.83505	3.54805	3.42552	3.40016
Olfr598	4.84099	4.40836	4.36125	4.67109	4.42712	4.51705	4.38559	4.09447	3.62406	4.02801	4.29807	3.43933	4.37202	5.05938	4.54353	4.20487	4.5927	5.56342	4.86291	4.99486	4.78672	6.41948	4.67685	4.32347	4.36441	4.50384	4.45599	3.94706	5.27567	4.06291	4.39264	4.47936	4.26119	5.92033	6.45145	4.28961	5.02103	4.72984	4.62853	5.07113
Olfr599	4.47287	4.55706	4.34419	4.17842	4.0957	4.29588	4.20913	4.06178	4.48888	4.41691	4.04417	5.06656	3.98182	3.90545	4.12865	4.29775	3.89372	4.47455	3.83114	4.56843	4.11801	4.33725	4.17261	4.35358	4.10382	4.31935	4.06036	4.16266	4.06109	4.43518	3.86322	3.84877	4.05787	4.56476	4.45018	4.21883	4.78408	4.54128	4.29639	4.34157
Olfr6	5.21327	4.8996	4.96489	5.08297	4.8013	4.76286	4.6867	4.59569	4.6867	4.60272	4.63478	4.89993	5.10555	4.83082	4.77828	4.71493	4.38263	5.19047	4.43932	4.95625	4.77149	5.24633	5.04738	4.87298	4.95315	4.85251	4.9089	5.02598	4.95252	4.90678	4.99265	5.06565	4.84453	4.95252	5.31718	5.37862	5.56331	5.18203	5.39809	5.12039
Olfr60	3.61019	3.5985	3.67733	3.91702	3.36485	3.77444	4.21936	3.83143	4.1578	3.97415	4.0231	4.99726	3.88654	4.13676	4.32277	4.23566	3.89732	4.23799	3.13905	4.68979	3.95263	5.27497	4.07613	3.95914	3.73573	3.75661	3.83519	4.07613	4.1578	4.03353	3.69987	3.61109	3.68657	4.08201	4.72701	3.85797	4.52283	4.54611	3.8197	4.35627
Olfr600	4.19263	3.84827	4.13635	4.00392	3.98815	3.98725	4.20056	4.38704	4.07961	4.14775	4.0917	4.13635	4.34096	3.62993	4.2639	4.8066	3.93836	3.97667	4.1371	3.92582	4.39119	4.62105	4.1033	3.87775	3.93539	4.55071	4.2115	4.39571	4.09925	4.28155	4.01166	4.13635	4.08412	4.01947	3.82882	4.20796	4.05125	4.38872	4.75801	4.09014
Olfr601	5.62054	5.33396	5.78323	5.47156	5.58088	5.47488	5.47886	5.46543	5.34305	5.45399	5.35662	5.18428	5.77335	5.85704	5.53698	5.51184	5.25793	5.7526	5.52718	5.4422	5.22498	5.37737	5.46269	5.34602	5.42976	5.89012	5.41833	5.38809	5.67788	5.6405	5.58689	5.62345	5.39542	6.1096	5.83046	5.75969	5.58713	5.77862	5.91377	5.61061
Olfr603	4.49256	4.11316	4.34232	4.24812	4.25052	3.82825	4.09818	4.34325	5.01527	5.0568	4.28913	5.46717	4.59599	4.06516	4.35924	4.69105	4.91331	4.50067	3.90161	4.83471	3.88015	4.8117	3.78555	3.69934	3.85667	3.97035	3.7673	3.42892	4.26953	3.78926	3.79967	4.07252	3.77137	3.66891	5.18633	4.09203	4.28593	4.1482	3.90292	4.65159
Olfr605	5.13192	4.87335	4.83426	5.30419	5.036	5.1013	5.43919	4.7453	4.97071	4.93159	5.56697	5.20163	5.25231	5.25856	4.77104	4.47374	5.11209	4.55223	5.45473	5.0357	5.34054	5.34133	5.10538	4.92259	4.85475	5.53392	5.0238	4.48176	5.27924	5.20622	5.01274	4.46051	4.67329	5.5927	4.58567	5.19341	5.37304	4.94152	5.72433	5.17823
Olfr606	4.24955	4.17467	4.18757	4.22478	3.93502	3.91887	3.68344	4.04754	3.6902	3.9732	4.04279	3.56041	3.8775	3.89865	3.66518	4.16683	3.52248	3.98962	3.58311	3.91474	3.66752	3.88002	3.74964	3.77101	3.72202	4.03035	3.87797	3.70895	3.74361	4.0238	3.73241	3.98989	3.69532	4.35858	3.87797	3.93791	4.11236	3.98156	3.85521	4.01763
Olfr607	4.14886	4.16063	4.48989	4.02432	4.22688	4.18757	3.77938	4.06315	3.88571	3.95853	3.98922	3.40924	4.30323	4.24252	4.16047	4.54405	4.57586	4.20708	4.13164	4.77203	4.28827	4.98445	4.30288	4.31449	3.90916	4.17701	4.28587	4.12333	4.33532	4.26855	4.38468	4.5781	4.20231	4.66033	4.46972	4.56631	4.6217	4.52863	4.70121	4.32788
Olfr608	5.43229	5.46654	5.53175	5.42751	5.45328	5.34494	5.50029	5.60553	5.67475	5.32806	5.37531	5.58147	5.5302	5.53619	5.33695	5.90096	5.85799	5.89913	5.52284	5.60868	5.28428	5.59867	5.21923	5.24316	5.31556	5.88862	5.30206	5.52331	5.52632	5.70871	5.1833	5.55057	5.47302	4.88797	5.24824	5.61952	5.646	5.89213	5.9262	5.36066
Olfr609	5.6347	5.42485	5.56936	5.38193	5.72311	5.25512	5.53988	5.52134	4.86945	5.43028	5.23606	5.68212	5.34776	5.50997	5.70295	5.36497	5.64547	5.92354	5.75262	6.22469	5.24316	5.42442	5.30036	5.25671	5.18655	5.51107	5.08047	5.55557	5.47491	5.34138	5.4578	5.42289	5.24065	5.43037	5.30503	5.6155	5.41014	5.58232	5.3652	5.36001
Olfr61	5.80507	5.72915	5.42062	5.74553	5.34312	5.64449	5.66868	6.06383	5.7086	6.35277	5.62883	5.79127	5.53417	5.80266	5.12311	4.7124	5.27403	5.02538	5.05473	4.95622	5.06492	4.82295	5.06574	5.0011	5.07483	6.05626	4.93111	5.22578	5.17797	5.65383	5.10014	5.18977	5.13849	5.43955	4.94259	5.5424	5.52257	5.36988	5.73059	5.13328
Olfr610	5.61012	5.59739	5.49821	5.41221	5.36516	5.52016	5.64654	5.51596	5.16408	5.63849	5.59242	5.28437	5.41747	5.32474	4.85132	5.25501	5.84963	5.03085	5.6687	5.53956	5.75889	5.48153	5.42833	5.10883	5.48203	5.77905	5.43839	5.20816	5.75894	5.79588	5.6395	5.94223	5.31263	5.58691	5.81897	5.77026	5.51234	5.84989	5.60103	5.48507
Olfr611	4.68244	4.35753	4.68437	4.40724	4.25331	4.12973	4.12689	4.12885	4.86821	4.70581	4.28996	4.91355	4.70021	4.88326	5.02865	4.75095	5.03696	5.22847	4.74121	4.68321	4.24625	4.50187	4.30352	4.41164	4.47435	4.43167	4.05102	4.43486	4.1616	4.69436	4.01656	4.01102	3.96131	4.32948	4.55676	4.66928	4.6098	4.3882	4.36096	4.05365
Olfr612	3.74651	3.77838	4.10257	3.893	3.68184	3.90301	3.84504	3.9729	4.31232	4.01032	4.22787	4.70308	3.87048	4.01317	3.96314	4.06425	4.65459	4.0697	3.91301	4.57035	3.93074	4.84951	3.94682	3.67492	3.79485	3.96605	3.70841	3.91386	3.92305	3.99912	4.02125	3.89252	3.94327	4.3182	4.31295	4.18521	4.01317	4.0439	3.95171	4.02081
Olfr613	4.08943	3.97263	3.99648	3.9961	3.96745	4.18891	3.99762	4.11813	4.08991	4.14811	4.24607	4.35024	4.01602	4.49917	4.23089	4.61526	4.48132	4.22666	4.06336	4.225	4.4487	4.63557	4.04228	4.28314	4.07003	4.4511	4.09076	4.00039	4.14811	4.0326	3.93816	4.04665	4.07341	4.14811	3.89695	4.15546	4.12581	4.12706	4.28139	4.25132
Olfr615	4.3134	4.44713	4.34633	4.43484	4.11101	4.2578	4.33134	4.20075	4.40947	4.32466	4.24769	4.71327	4.40748	4.48187	4.66503	5.04039	5.05679	4.61866	4.81868	4.69174	4.70348	4.61292	4.06826	4.23528	4.1633	4.27126	3.95604	4.23196	4.63342	4.16303	4.14885	4.23734	4.04172	4.59391	4.87316	4.28398	4.37675	4.27943	4.36377	4.40319
Olfr616	4.68687	4.535	4.5573	4.44528	4.51579	4.39942	4.43978	4.54603	4.42923	4.26785	4.55959	4.92045	4.51195	4.19155	4.09242	4.25733	4.304	5.0296	4.50257	5.00808	4.49739	4.94143	4.31148	4.07133	4.52388	4.91257	4.2764	4.4186	4.06485	4.89773	4.33022	4.46207	4.314	5.03958	4.25743	4.28982	5.12771	4.81443	4.69968	4.80052
Olfr617	4.0771	4.19096	4.12338	3.93247	4.10784	3.90397	4.32107	4.65261	4.48346	4.39047	4.16882	4.77805	3.92775	3.77447	3.88825	4.2166	4.60144	4.21453	4.14218	3.68521	4.01956	3.86476	3.69361	3.59503	3.79451	4.2071	4.09908	4.02595	4.10312	3.78504	3.79868	3.73478	3.72756	3.9273	3.91999	3.88981	3.8939	3.99595	3.79267	4.10913
Olfr618	3.85701	3.74109	3.77926	3.80152	3.71308	3.58255	3.71179	4.02577	3.61824	3.7032	3.56594	3.40716	3.85974	3.30083	3.57307	3.45404	3.74191	3.80442	3.64413	3.99573	3.50999	3.74346	3.36444	3.36311	3.31599	3.94894	3.22656	3.43357	3.35665	3.52917	3.48041	3.57623	3.34827	3.97184	3.58454	3.53401	3.66863	3.70714	3.55428	3.42415
Olfr619	4.06166	3.90758	4.07102	4.18661	3.77114	3.99988	3.60369	3.88063	3.77873	3.77209	3.82382	4.04983	3.61179	3.64357	4.22354	3.67929	3.78591	3.96201	3.89681	4.21136	3.82291	4.03517	3.61287	3.72289	3.65139	3.61214	3.6387	3.62087	3.82021	3.66662	3.70642	3.75063	3.59137	3.52894	3.74649	3.77259	3.77571	4.12546	3.75274	3.83545
Olfr62	4.77442	5.01577	4.75606	4.49365	4.49102	4.67198	4.74853	4.59705	4.43001	4.4718	4.55316	4.84152	4.70382	4.63568	4.50102	4.89595	5.06523	4.73163	4.69577	5.07004	4.7973	5.15619	4.61268	4.42775	4.45754	4.60963	4.39545	4.73346	4.69519	4.74335	4.62848	4.67606	4.59429	4.87659	4.86334	4.73685	4.86168	4.94674	4.98823	4.85775
Olfr620	4.74755	4.84577	4.49792	4.58909	4.56521	4.3746	3.78034	4.14121	3.66232	3.77953	4.04341	3.96404	4.12687	4.22273	4.17921	4.18921	3.98063	4.09246	3.92215	4.26528	4.24122	4.21866	3.9541	4.25247	4.26864	4.0649	4.61997	4.54266	4.21844	4.26517	4.06046	4.13218	4.3917	4.48057	4.43488	4.52004	5.00219	4.23492	4.5793	4.47577
Olfr622	4.35565	4.6015	4.50856	4.37068	4.32851	4.54041	4.0691	4.2777	4.10829	4.29855	4.01756	5.33149	4.26412	3.92856	4.0407	4.23811	4.03682	4.21859	3.92186	4.22313	4.18511	4.68525	4.13419	3.90449	4.30564	4.24651	3.79382	4.25488	4.80147	4.29382	3.97441	4.11055	4.45692	4.82667	4.52821	4.74566	4.49382	4.77115	4.34841	4.36483
Olfr623	4.25972	4.17956	4.01564	4.40004	3.90954	4.17111	4.54186	4.85578	4.74911	4.28374	4.38935	5.17919	4.08479	4.38254	4.10802	4.65444	4.78053	4.62802	4.56381	4.42281	4.51229	5.09895	4.21433	4.2838	4.20961	4.10688	3.72039	4.0297	3.5236	4.03695	3.91705	4.03867	3.75598	4.65964	4.28954	4.15195	4.17189	4.66997	4.02558	4.07653
Olfr624	4.70096	4.89986	4.15452	3.47384	3.51177	3.39659	3.44966	3.10301	3.35212	3.42428	3.09208	2.97242	3.63216	3.50018	3.52366	3.46721	3.55166	3.29836	3.62387	3.82192	3.48853	4.29557	3.35314	3.49927	3.5656	3.71842	3.29991	3.15526	3.22	3.55039	3.64684	3.30814	3.29265	3.4915	3.62853	3.09543	3.60022	4.14173	3.54921	3.52572
Olfr628	3.20573	3.29332	3.19308	3.26973	3.14921	3.27275	3.55028	3.5145	3.60864	3.88832	3.14702	3.87481	3.52858	3.57331	3.26834	3.97688	3.43409	3.61859	3.27666	3.42931	3.34855	3.59951	3.16216	3.16242	3.15243	3.17252	3.15598	3.1668	3.22328	3.00248	3.23091	3.24372	3.13693	3.70431	3.42243	3.22947	3.13363	3.32782	3.27972	3.39614
Olfr629	3.80254	3.90673	3.75577	4.02784	3.72541	3.90751	3.83542	3.96857	3.74433	3.65565	4.06027	3.48418	3.82596	4.29436	4.51704	4.16901	3.9504	4.16725	4.06027	4.59795	3.82085	4.59341	4.02248	3.89234	4.16582	4.45205	3.80686	3.82684	3.93862	3.8948	3.84155	4.42653	3.94208	4.33988	4.15875	4.14951	4.14498	4.23131	3.98249	3.83807
Olfr63	5.99146	5.90776	6.01412	5.91322	5.85176	5.75971	5.73873	6.30934	5.54518	5.74451	6.07034	5.94392	5.76565	5.79941	5.94995	5.66189	6.02768	5.2342	5.76799	6.37616	5.48203	6.03233	5.88112	5.64334	5.61851	5.72052	5.53192	5.56991	6.09684	5.74645	5.66703	5.74617	5.42016	6.07946	5.22642	5.80923	5.94288	5.96668	6.07423	6.32662
Olfr630	3.88727	3.70653	3.71913	3.54963	3.79408	3.47513	4.00258	4.1669	4.40681	3.9739	3.70145	4.69433	3.53791	3.70275	3.76404	3.66857	3.59855	3.97181	3.72884	4.52606	4.13579	4.3139	3.49542	3.6936	3.61051	3.56302	3.81266	3.74407	3.56966	3.89606	3.64231	3.63617	3.63104	4.27193	4.11634	3.80258	4.02639	3.74998	4.00985	3.74217
Olfr631	3.58429	3.49801	3.69231	3.39199	3.41821	3.55755	3.73582	3.97889	4.30074	4.18227	3.35441	4.94672	3.88172	3.76627	3.51992	3.36171	3.4801	3.95342	3.55173	3.71771	3.6797	3.70462	3.3741	3.44307	3.44982	3.64454	3.49333	3.72779	3.48892	3.55725	3.55936	3.52301	3.46978	3.79121	3.65273	3.62634	4.01346	3.62894	3.73159	3.48944
Olfr632	5.75355	5.70321	5.88486	5.54957	5.41494	5.43788	5.39818	5.54385	5.50919	5.44976	5.61523	5.35255	5.55218	5.42881	5.65268	5.62743	5.57598	5.50127	5.42666	5.57049	5.58558	5.4355	5.64599	5.68299	5.8397	6.00255	5.55395	5.60882	5.48995	5.93918	5.64443	5.52769	5.63396	5.63396	5.87269	5.92264	6.20466	5.94022	5.96996	5.95829
Olfr633	5.20965	5.28076	5.17193	5.43191	5.14459	5.27947	4.92918	4.89231	4.82815	5.19032	4.72999	5.2106	5.35249	4.94398	4.7679	5.07248	4.89818	4.87934	4.94359	5.09705	4.79348	4.88973	5.20974	5.18633	5.20791	5.79652	4.7956	5.16767	5.63073	5.41566	4.81455	5.35843	5.08982	5.36707	5.35745	5.43676	5.30968	5.124	5.30207	5.2391
Olfr635	5.53155	5.03614	5.08	5.0407	4.76505	4.83689	4.92779	4.80428	4.94924	4.89033	4.72079	5.24549	4.53735	4.3152	4.66232	4.92037	4.49598	5.15345	4.93439	4.91615	5.16354	5.07731	4.74339	4.52606	4.73002	5.18685	4.78374	4.82982	4.56855	4.83121	4.84446	4.78115	4.4755	4.61357	4.69294	4.83689	4.8769	4.63444	4.92058	4.8392
Olfr638	5.20213	5.17047	5.39748	5.16882	5.32722	5.35932	5.38262	4.94154	5.10768	5.16716	5.22083	4.83338	5.07528	5.3654	5.38238	5.0402	5.08212	4.81127	4.93663	5.52033	5.42048	5.18137	5.10055	5.30699	4.87441	5.48754	5.16247	5.30003	5.71381	5.50198	5.29627	5.38562	5.06245	5.37955	5.18864	5.59561	5.71701	5.41648	5.34028	5.651
Olfr639	4.36111	4.27989	4.33252	4.21242	4.04383	4.38646	4.66269	4.7237	4.09402	4.37059	4.60391	4.5191	4.38339	4.37294	4.15196	4.3652	4.32296	4.14271	4.4024	4.75644	4.59431	4.4142	4.15399	4.30637	4.14592	4.55	4.35251	4.31991	4.49311	4.67272	4.24485	4.39377	4.33409	4.81395	4.33427	4.53407	4.27245	4.23335	4.23954	4.31589
Olfr64	4.64784	4.47842	4.33628	4.55332	4.4295	4.2567	4.18016	4.52906	4.39009	4.35525	4.24917	4.76189	4.41133	4.22803	4.41709	4.61505	4.41174	4.37861	4.51869	5.04281	4.76034	5.03837	4.20445	4.15735	4.11462	4.21836	4.35028	4.15487	4.53486	4.18234	3.95155	4.34084	4.15735	4.55652	4.32423	4.18615	4.48146	4.4569	4.26937	4.23382
Olfr640	4.33748	4.40419	4.3604	4.13696	4.24024	4.30144	4.33748	4.23858	4.21285	4.75583	4.33179	4.75896	4.35709	4.22629	4.66871	5.25501	4.59622	4.99231	4.20236	4.56034	4.04325	4.8475	4.58877	4.12809	4.23115	4.22157	4.05773	4.25736	4.33748	4.42926	4.54215	4.32017	4.14214	4.55317	4.6487	4.46646	4.60664	4.61697	4.05859	4.57167
Olfr641	5.15302	4.96945	5.04898	5.23808	4.96166	4.90118	4.95154	4.95888	4.78869	5.10955	4.68723	5.91266	5.09726	4.76135	4.63429	4.66119	4.66672	4.89107	4.83241	4.46864	4.76253	4.73697	4.68507	4.525	4.79632	4.86766	4.77905	4.92828	4.79814	5.20797	4.57813	4.66693	4.68884	5.03657	4.68948	4.86829	4.6507	4.80988	4.96024	4.90166
Olfr642	5.36176	5.49942	5.37545	5.19421	5.19711	5.04298	5.21452	5.55434	5.1677	5.53983	4.66061	5.25032	4.90228	4.91041	4.91703	4.96592	4.95405	5.01919	5.01609	4.67381	4.7114	5.01238	4.95715	4.7951	5.01093	5.38167	5.01238	5.18501	5.4602	5.31224	5.04939	4.73192	4.9861	5.01511	5.2104	5.01702	5.13824	5.11388	5.26935	4.89139
Olfr643	3.67301	3.70508	3.58051	3.56437	3.52879	3.67097	3.766	4.21439	3.5992	3.67769	3.64896	4.13421	3.67097	3.47709	3.52972	4.07924	4.11853	3.41647	3.35406	3.68233	3.55483	3.76647	3.80243	3.53421	3.38837	4.14373	3.6369	3.73617	4.03724	4.09229	3.77426	3.73079	3.57973	4.14128	4.04494	3.54937	4.23278	4.02928	3.67097	4.29682
Olfr644	5.13164	4.69997	4.76775	4.63659	5.02967	4.69845	5.03371	5.14236	5.1945	4.69954	4.63255	5.20472	4.65346	4.47281	4.61118	4.42675	4.72241	4.67398	5.0592	4.73524	4.69703	4.4481	4.45129	4.27532	4.59801	4.54217	4.57084	4.3741	4.41169	4.78325	4.32788	4.75247	4.51251	5.00357	4.69638	4.65709	4.82051	4.72157	4.99368	4.66189
Olfr645	5.30993	5.32616	5.38074	5.00952	5.16576	5.13397	5.05376	4.85397	4.62867	4.91326	5.29097	4.54291	5.28053	5.11556	5.07535	5.02483	5.10648	5.1177	5.26686	4.89706	4.92606	4.81175	5.10337	5.0799	5.20547	5.67392	5.06864	5.2909	5.22091	5.1191	5.2995	5.10631	4.93833	4.91707	5.39992	5.586	5.33	5.17367	5.48642	5.17409
Olfr646	5.52989	5.30221	5.62457	5.60787	5.55835	5.48756	5.43166	5.48846	5.50855	5.17959	5.47338	5.03265	5.25167	5.38562	5.19835	5.2649	5.29403	5.55392	5.13159	5.53689	5.6304	5.38158	5.34465	5.45876	5.23301	5.56423	5.37747	5.39016	5.15805	5.5668	4.97528	5.268	5.13266	5.75555	5.19746	5.69545	5.57542	6.06362	5.07647	5.38782
Olfr648	4.87156	4.95637	4.92498	5.15168	4.86426	4.74852	4.62901	4.53454	4.65546	4.65483	4.88425	4.827	4.53612	5.13417	4.74328	4.85186	5.18753	4.49812	5.00522	4.72462	4.47679	5.37163	4.88425	4.80646	4.61915	4.91134	4.75447	5.15899	5.02002	4.82412	4.88543	4.98517	4.76047	5.14726	4.69118	5.15142	4.97222	5.40217	5.03637	4.84253
Olfr649	4.39545	4.37264	4.69826	4.55898	4.29779	4.39545	4.18197	4.49473	4.25613	4.52419	4.56264	4.40112	4.66365	4.13279	4.48701	4.95713	4.55764	4.25399	4.64653	4.59906	4.62164	4.89746	4.39545	4.14125	4.30293	4.32294	4.09916	4.44147	4.38668	4.69389	4.26378	4.24417	4.26098	5.02382	4.47426	4.42695	4.61824	4.88814	4.53468	4.50078
Olfr65	3.96877	3.9939	3.94892	3.84305	3.77455	3.68987	4.42401	4.10851	4.36639	3.98376	3.89356	4.94561	3.96888	4.12113	3.64064	3.53707	4.19391	4.30689	3.85385	4.31699	4.40391	4.66395	4.01529	3.83665	3.76885	3.9452	3.77913	4.09339	4.37058	3.90047	3.8895	3.79272	3.62264	4.24391	5.01951	3.84859	3.97366	3.88072	3.98295	3.96877
Olfr651	5.14237	4.93715	4.99093	5.01821	4.73375	4.86472	4.5011	4.62279	4.40003	4.59251	4.92185	5.29546	4.59014	4.6248	4.48435	4.85612	4.97055	4.56408	4.86796	5.0618	4.79926	4.91181	5.05658	4.65575	4.86796	4.95552	4.70274	5.2074	4.57672	5.2498	4.95252	4.76686	4.86796	4.71714	4.99486	4.98766	4.82953	5.0403	5.01319	4.4661
Olfr652	5.17936	4.98155	5.05937	4.81518	5.02196	4.64797	4.66424	4.44193	4.46248	4.72521	4.75402	4.75758	4.45701	4.40262	4.59303	4.95962	4.46456	4.75147	4.87387	4.75758	4.89986	4.92505	4.66005	4.81373	4.74453	4.75758	4.79473	4.90042	4.86396	4.82553	4.8266	4.83223	4.66714	4.5382	4.77064	5.04409	5.06805	4.77869	4.87325	4.67712
Olfr653	5.22564	5.2416	5.13397	5.1536	5.06607	5.07911	5.02	5.31359	5.17936	5.09168	5.47906	5.38887	5.0997	4.95438	5.1843	5.1843	5.60158	5.25607	5.03677	5.53231	5.15797	5.45718	5.05918	4.81023	4.86172	5.46045	5.18753	4.95638	5.31654	5.25045	5.23898	5.19292	5.17574	4.86632	4.94885	5.23199	5.63423	5.22745	5.18834	5.09153
Olfr654	4.4564	4.17103	4.39313	4.35246	4.18641	4.12592	4.00123	4.28681	3.90812	4.34748	4.30172	5.00267	4.2074	4.08371	4.18704	4.08803	4.47076	4.6036	4.28784	4.57466	3.95062	4.01629	4.19218	3.91849	4.07486	4.64954	4.42353	4.41388	4.02513	3.99651	3.81045	4.19218	4.11176	4.31376	3.89269	4.43692	4.52734	4.04269	4.48618	4.01407
Olfr655	4.70732	4.63744	4.39226	4.38388	4.66385	4.32397	3.95022	3.9514	4.21513	4.23146	3.88373	4.1972	4.29979	4.28541	4.98066	4.25463	3.9849	4.34613	4.33614	4.16502	3.99732	4.65314	4.25004	4.28683	4.33589	4.75219	4.16582	4.44881	4.26607	4.65279	4.40176	4.67406	3.92355	4.55269	4.59229	4.4058	4.51923	4.44183	4.48122	3.99165
Olfr656	5.30021	5.43985	5.1975	5.16867	5.18379	5.1356	5.32214	5.30583	5.40483	5.38073	4.85995	5.32707	5.22286	5.37174	5.24181	5.24181	4.85131	5.05861	5.27201	5.67737	5.34114	5.12473	5.08537	5.01575	5.04288	5.83302	5.25317	5.40007	5.50752	5.18204	5.20386	5.24181	5.23756	5.28865	5.2025	5.46838	5.27439	5.56794	5.38088	5.48315
Olfr657	5.13671	4.9913	4.98554	4.96785	4.96165	4.98058	5.3376	4.88085	4.44227	4.88425	4.5683	4.78286	5.0316	4.77637	4.63627	4.88425	4.86838	5.02834	5.02395	5.0348	5.02941	5.19785	4.65104	4.70506	4.80112	5.52132	4.88425	5.04974	4.88425	5.14561	4.74086	4.94987	4.81036	5.28721	4.5588	4.88425	5.09603	4.96243	4.97565	5.18436
Olfr658	5.63359	5.59248	5.63549	5.58004	5.39738	5.58078	5.50554	5.30194	5.37919	5.46007	5.52103	5.66942	5.36631	5.35815	5.51658	5.69199	5.7378	5.67418	5.37238	5.86902	5.87969	5.83802	5.73238	5.69527	5.63028	5.89767	5.89129	6.22599	5.74129	6.04347	5.79891	5.8494	5.66549	6.0987	5.923	5.65289	5.80529	6.11626	5.99786	5.87391
Olfr659	4.40123	4.41319	4.29448	4.23598	4.09776	4.16201	4.36619	4.05955	5.10288	4.72163	4.50822	4.6853	4.0281	4.62823	4.15622	4.43003	4.69084	4.07894	4.26306	4.5395	4.30103	4.30015	4.07682	4.14335	3.83358	4.47299	3.73334	4.21442	4.84445	4.84047	4.30642	4.51512	3.94957	4.34512	4.22452	4.39444	4.56362	4.32047	4.33351	4.32323
Olfr66	3.8708	3.7818	3.77224	3.82974	3.72169	3.7063	3.51175	4.03835	4.07509	3.7305	3.67889	3.68873	3.63929	3.81253	3.44412	4.01612	3.99482	4.04887	3.869	3.81253	4.21565	4.25311	3.66569	3.5943	3.68422	3.94638	4.06568	3.67058	4.10955	3.81253	3.91817	3.78294	3.89285	3.90042	3.78681	4.18387	4.14435	4.14076	3.64103	3.58522
Olfr661	4.50269	4.67724	4.74137	4.30058	4.42859	4.4391	4.66061	5.14003	4.93529	4.67162	4.78284	5.12192	4.30244	4.73373	4.56704	4.35307	4.55314	4.37646	4.5896	4.73978	4.73598	4.87575	4.33392	4.66325	4.34483	4.34411	4.37564	4.47044	4.46793	4.5375	4.4814	4.48662	4.51704	4.25248	4.55746	4.56028	4.56704	4.71119	4.5375	4.69959
Olfr663	4.82919	4.38658	4.39413	4.13008	4.48277	4.30669	4.27298	4.02152	4.09441	4.19801	3.92024	4.38494	4.12123	3.95892	4.33521	4.81021	3.99287	3.98292	4.1426	4.34841	4.05849	4.49778	4.51659	3.95235	4.15524	4.58062	4.32631	4.05282	4.43376	4.34459	4.6991	4.29037	4.1366	4.38014	4.48995	4.26003	4.20543	4.62734	4.42928	4.72284
Olfr665	3.43914	3.35674	3.74214	3.52721	3.65204	3.59356	3.92414	3.67861	3.57611	3.81369	3.5667	4.18178	3.71043	3.50353	4.58139	4.21372	3.49386	4.25639	3.87606	3.64846	3.89617	3.90391	3.37391	3.38485	3.3401	3.97685	3.36794	3.53262	3.59734	3.35804	3.67323	3.92738	3.59353	3.68062	4.00922	3.95354	3.86723	3.75344	3.65372	3.65434
Olfr666	4.95535	4.71889	4.89648	4.73309	4.96862	4.66801	5.88884	5.44224	5.09944	5.15928	5.23434	5.22791	5.3804	5.35908	4.83895	5.12176	5.16086	5.51187	5.35136	5.0851	5.04505	5.1975	4.82265	4.54878	4.71161	4.99621	4.9385	4.93819	5.13068	4.64051	4.77176	4.93259	4.88657	4.39685	5.15535	5.22472	5.2948	4.77193	5.03176	4.73176
Olfr667	4.85417	4.75925	4.85572	4.82881	4.71522	4.63882	4.65565	5.00925	5.0128	4.87368	4.70258	4.85996	4.7908	4.42786	4.63201	4.82793	4.93928	4.98598	4.65569	5.07784	4.64128	4.93303	4.64803	4.75884	4.63674	4.75641	4.81761	4.67332	4.83764	4.71414	4.53029	4.74177	4.62998	5.14238	5.18598	4.58813	4.76754	5.06983	4.96013	4.49366
Olfr668	3.77004	3.69449	3.8253	3.61308	3.56901	3.62763	3.86368	3.73777	3.55331	4.07827	3.77515	3.68696	3.76048	3.49028	3.90127	3.64821	3.7436	4.01894	3.90883	4.29134	3.71269	4.00644	3.61324	3.59694	3.611	4.18531	3.78863	3.73359	3.58644	3.89982	3.68913	3.73511	3.486	3.74359	3.89834	3.9349	4.34404	3.81943	3.96829	3.71863
Olfr669	5.51334	5.22641	5.32271	5.0956	4.95602	4.9747	5.22481	5.00481	4.69756	4.99004	4.65037	5.13536	5.01163	5.0236	5.23785	5.22002	5.06314	4.91653	5.2498	5.142	5.18968	4.93438	5.30777	5.0509	5.01949	5.2674	5.13644	4.84931	5.30875	5.1392	5.142	5.33888	5.08118	6.06741	5.32223	5.54997	5.03425	5.91103	5.28282	5.00842
Olfr67	3.38586	3.47723	3.60135	3.21399	3.36588	3.36737	3.19716	3.59164	3.73446	3.68986	3.35771	3.81362	3.26652	4.11813	3.8422	4.03018	4.00546	4.1601	3.47407	3.66921	3.3529	3.58407	3.25867	3.24539	3.08753	3.42555	3.2505	3.36892	3.72526	3.59426	3.40895	3.33452	3.2595	4.21534	3.87464	3.49059	3.65213	3.50201	3.37721	3.25879
Olfr670	5.07261	5.3919	4.79656	5.14803	4.85423	4.93603	4.64526	4.76524	4.24909	4.41267	4.31252	4.81493	4.11712	4.50373	4.42651	4.53456	4.2161	4.84202	4.29274	4.90364	4.81634	4.85618	4.76524	4.89877	4.62538	5.22865	4.76524	4.49004	4.77489	5.0443	4.79927	4.7988	4.81411	5.75299	5.1304	5.12086	4.98644	4.86526	4.93343	4.80988
Olfr671	4.46454	4.4832	4.44018	4.38561	4.09744	4.33676	4.02873	4.18021	4.34476	4.20951	4.4487	4.96096	4.24581	4.16339	4.21897	4.11216	4.07419	3.95125	3.94221	4.23282	3.69633	4.30459	3.90932	4.03429	4.05801	4.69092	4.11916	4.33367	4.44653	4.25958	4.5398	4.22714	4.28545	4.12706	4.38573	4.10081	4.28147	5.132	4.65093	4.58416
Olfr672	4.3549	4.13363	4.34168	3.93332	3.91446	3.99999	4.80054	4.65354	4.80455	4.58602	4.66136	5.06928	4.16647	3.98331	4.2001	4.48058	4.27929	4.15159	3.88244	4.17103	4.05547	4.25864	4.18213	3.90518	3.83058	4.20257	4.17103	4.15946	4.34401	4.39142	4.17238	4.31669	3.98331	4.55218	4.12977	4.56194	4.60454	4.12126	4.41088	4.07006
Olfr675	3.82364	3.5391	3.88115	3.71074	3.59334	3.74502	3.58664	3.54864	3.78634	3.54313	3.6544	3.61296	3.94493	3.7932	3.85515	4.51616	3.74333	3.82912	3.96175	4.06951	3.56494	4.39047	3.26222	3.71994	3.67025	4.26445	3.35244	3.70157	3.8279	4.1185	3.59778	3.83116	3.65152	4.104	3.69117	3.53699	3.37711	4.22421	3.49286	3.67189
Olfr676	4.11711	3.95197	4.11489	4.14517	3.83844	3.78977	3.65769	4.16828	3.48469	3.92006	3.64886	3.8413	3.81206	3.50547	3.9605	3.88704	3.92708	3.91179	3.65575	3.93679	3.73069	3.80332	3.61786	3.84265	3.80128	4.12145	3.80712	3.79484	4.10884	4.23894	3.65674	3.84787	3.74372	4.20382	4.11736	4.02493	4.45996	4.14369	4.17782	3.74084
Olfr677	4.0119	3.95256	4.08768	3.96037	4.03281	4.00246	3.93533	3.84552	4.00161	4.5293	4.08822	3.93803	3.8281	3.78058	3.84595	4.45962	4.13097	3.82294	4.27069	4.12357	3.83914	4.46413	3.84793	3.70831	3.79382	3.68105	3.71963	3.95571	3.84381	4.13352	4.06014	3.95256	3.81934	4.10426	4.17546	4.03276	4.2579	4.29995	3.94946	3.80901
Olfr678	5.98395	5.96082	5.89323	5.84591	5.79728	5.80502	5.66671	5.98725	6.2367	5.79857	6.17364	6.07921	5.77567	5.53996	5.88435	5.72233	5.99428	5.72756	5.76703	6.14696	6.0963	5.99746	5.69074	5.60926	5.8421	6.11111	5.66873	5.9014	5.8365	5.98597	5.49464	5.9122	5.75975	5.77264	6.17404	5.97389	6.18198	5.59951	5.92257	6.01205
Olfr679	4.32155	3.98777	3.97075	3.6441	3.84132	4.04173	3.88826	3.98496	3.74991	3.98075	4.23025	3.96547	4.01246	3.62667	3.69304	4.23742	4.22721	4.1116	3.95501	4.35406	3.95075	4.25911	3.59665	3.63426	3.59585	3.68653	3.70853	3.93169	3.47251	4.03388	3.73802	3.7963	3.7984	4.01391	4.04175	4.17235	3.94649	3.73765	3.77977	4.3664
Olfr68	4.38891	4.15129	4.61661	4.37092	4.00436	4.18626	4.23065	4.26036	4.30307	3.97136	4.38923	4.58027	4.35434	4.01789	4.21878	4.76829	4.3799	4.16795	4.18329	4.01552	4.04439	4.19306	4.23734	4.03677	3.9652	4.02666	4.19122	4.2622	4.14283	4.31992	4.05776	4.21348	4.13883	4.46192	4.28822	3.90518	4.40762	4.32044	4.5792	4.1059
Olfr681	4.32155	3.98777	3.97075	3.6441	3.84132	4.04173	3.88826	3.98496	3.74991	3.98075	4.23025	3.96547	4.01246	3.62667	3.69304	4.23742	4.22721	4.1116	3.95501	4.35406	3.95075	4.25911	3.59665	3.63426	3.59585	3.68653	3.70853	3.93169	3.47251	4.03388	3.73802	3.7963	3.7984	4.01391	4.04175	4.17235	3.94649	3.73765	3.77977	4.3664
Olfr683	3.87669	4.10948	4.09725	4.04339	3.89499	3.91339	3.97078	4.10876	4.07263	4.10876	4.25803	4.51249	4.00004	4.20263	4.18674	4.56018	4.27657	4.17152	4.19517	4.08921	4.10017	3.82942	4.00699	3.95856	3.79725	4.10552	4.17425	4.09235	4.4239	4.37214	3.92345	4.06833	3.81092	3.76502	4.48538	4.12791	4.37039	4.07556	4.43682	4.37451
Olfr684	3.97579	4.0198	4.03676	3.81989	3.72507	4.03925	4.71003	4.04367	4.05669	4.32602	3.95157	4.41935	3.95513	3.93733	3.66527	4.04126	3.98891	4.34664	3.9477	4.77625	4.22733	5.13583	3.52848	3.93983	3.9208	3.8333	4.16409	3.91073	4.54451	4.10468	4.01174	3.78168	3.69493	4.33534	4.80955	3.9898	4.55612	4.10668	3.87064	4.75489
Olfr685	5.19295	4.40848	5.06289	4.78789	4.70131	4.73396	4.60398	4.48766	4.21764	4.32403	4.56556	4.78129	4.70315	4.77079	4.53392	4.79947	4.08762	4.61542	4.7	4.98424	4.78705	4.91128	4.88609	4.71614	4.87379	4.67739	4.65737	4.93677	4.81576	5.12214	4.97573	4.7724	4.82276	4.93532	4.51619	4.73396	4.92566	4.73396	5.09134	4.57871
Olfr686	5.25159	5.20939	5.17041	4.94013	5.12041	5.16013	5.21783	5.11849	5.30268	5.21677	4.94536	5.26902	5.05365	5.01122	5.17041	5.57384	5.31056	4.80194	4.814	5.0127	4.88833	4.92505	5.38049	5.08157	5.2564	5.3343	5.20178	5.18	5.27826	5.10019	5.05906	5.24472	4.99671	5.3558	5.08604	5.23383	5.34179	5.61758	5.19902	5.495
Olfr688	4.4153	4.46615	4.39281	4.40838	4.30425	4.35188	4.78658	4.67806	4.74367	4.54357	4.60015	4.76027	3.97946	4.41855	4.49956	4.5027	4.50938	4.33752	4.28705	4.95733	4.5711	4.88317	4.08195	4.14227	4.03951	4.47168	4.40202	4.37211	4.69211	4.37015	4.25985	4.38801	4.16499	4.59234	4.35729	4.54527	4.38889	4.47881	4.51809	4.12468
Olfr689	5.02382	5.06317	5.2314	4.9888	5.11018	4.94859	5.12359	5.50298	5.32784	5.11443	5.21598	5.58257	4.92315	4.97562	4.80811	4.83368	4.83792	5.48239	5.0567	4.94913	4.89987	5.55218	4.7834	4.76607	4.84513	5.34106	5.04403	5.0868	5.46365	4.93436	4.85496	4.69912	4.77119	5.03051	5.65383	4.92977	5.13906	5.37118	5.24394	5.20701
Olfr69	3.26036	3.20748	3.25816	3.12314	3.21899	3.15704	3.69011	3.43981	3.56626	3.54387	3.39638	3.60169	3.27006	3.69004	3.63197	3.15423	3.17409	3.42099	3.09548	3.7814	3.51881	3.56431	3.00137	3.16459	3.00833	3.19019	3.13491	3.02024	3.31649	3.32164	2.98352	3.1286	2.94966	3.41531	3.24011	3.20622	3.0199	3.01508	3.24593	3.33649
Olfr690	5.13737	4.9531	4.99123	5.08822	4.87396	4.94608	5.00169	5.17275	5.11286	5.25754	4.98448	5.84926	5.19932	5.01185	5.00639	5.12149	5.20251	4.71428	5.00811	5.11378	5.37985	5.11054	4.99154	4.87658	4.75911	5.33124	5.09377	5.153	5.24045	5.17858	5.21338	5.08724	4.95585	5.16176	5.1133	5.14277	4.95848	5.25075	5.35277	5.14994
Olfr691	4.97584	4.91606	4.91846	4.87167	4.70209	4.93912	4.66451	4.56624	4.24331	4.54341	4.8428	4.31118	4.54682	5.03768	4.8428	5.16537	4.85389	4.89377	4.8428	5.17134	4.79706	4.9466	4.7629	4.68101	4.68286	4.81198	4.8428	4.66517	4.79814	4.52424	4.7811	4.80474	4.57889	5.1111	4.99169	4.97413	5.20529	5.39366	5.26444	4.75493
Olfr692	5.13922	5.29546	5.17536	5.10799	5.26633	5.26633	5.08105	5.3152	4.9857	5.08302	5.26795	5.24283	5.07621	5.0268	4.99532	5.24099	4.9853	4.82252	4.79678	4.40835	5.15932	5.05848	5.3693	5.05676	5.3246	5.47936	4.80619	5.40788	5.40378	5.35475	5.38677	5.16856	5.34795	5.06119	5.12324	5.52428	5.54353	5.88782	5.33229	4.98293
Olfr693	4.89553	4.88872	4.90612	4.89019	4.874	4.77137	4.68899	4.74262	4.65261	4.88932	4.5636	4.74353	4.70271	4.43187	4.76912	4.90394	4.8121	4.80131	4.90753	4.62927	4.65503	4.92167	4.9599	4.79374	4.66262	5.30925	4.84599	5.09315	4.48113	5.04479	4.60845	4.79675	4.83532	5.28168	5.0704	5.25385	5.6043	5.15722	5.20372	4.89166
Olfr694	4.75459	4.78296	4.74561	4.72371	4.88531	4.58374	4.5585	4.73198	4.77405	4.47207	4.64309	4.72698	4.65918	4.40187	4.6846	4.93859	4.95937	4.66798	4.49228	4.64646	4.38429	4.70846	4.63715	4.51297	4.41764	5.14251	4.47946	4.63715	4.63715	4.57732	4.31378	4.5251	4.38558	4.65848	4.58496	5.03064	4.97722	5.0469	4.63133	4.86017
Olfr695	4.09538	4.32724	4.05588	4.45069	4.01027	4.0787	4.11633	4.49276	3.79803	4.32606	4.26585	4.23592	4.03689	4.02553	4.23299	4.08327	4.17326	4.23917	4.01562	3.93479	4.04792	4.27044	4.08758	4.08568	4.14001	4.64825	4.26268	4.10357	4.46187	4.00691	4.03802	3.90623	4.1985	4.58676	4.30603	4.44153	4.29085	4.43165	4.23566	4.111
Olfr697	5.38571	5.28989	4.96957	5.46186	5.25028	4.96938	4.58513	4.74844	4.8197	5.02377	4.81924	4.68857	4.89909	4.75624	4.73227	5.26525	4.97365	4.69534	4.83363	4.95558	4.88921	4.96607	5.14295	4.84435	4.97024	5.31996	4.92109	4.89686	5.12385	4.68685	4.91789	4.83327	4.84003	5.00816	4.66793	5.00966	5.27803	5.04244	4.95241	4.74936
Olfr698	4.84159	4.90489	4.97684	4.62787	4.78562	4.63347	4.77023	4.59863	4.8978	5.34628	4.60891	5.67533	4.96639	4.90595	4.64323	5.38018	5.15843	5.12987	4.82028	4.85658	4.5832	4.97406	4.55958	4.63087	4.71726	4.71331	4.49833	4.88134	4.86553	4.90601	4.96652	4.83291	4.81246	5.13171	5.17812	4.85658	4.87973	4.67611	5.06539	5.03431
Olfr699	4.483	4.57089	4.48333	4.48122	4.48389	4.39017	4.46153	4.07964	4.11388	4.38174	4.43694	4.42953	4.2505	4.40084	4.23356	4.78909	4.54306	4.76184	4.13538	5.027	4.74766	4.09904	4.19652	4.3958	4.24797	4.82228	4.73223	4.48122	4.77974	4.87994	4.35185	4.61087	4.46745	4.80808	3.98034	4.93048	4.69162	4.89004	4.42721	4.31986
Olfr70	5.75522	5.79849	5.8351	5.76982	5.69854	5.67224	5.53881	5.47948	5.45879	5.52491	5.48843	5.34638	5.61991	5.51654	5.54516	5.69887	5.32766	5.44632	5.36876	5.69755	5.23412	5.31315	5.74162	5.69399	5.74831	5.99917	5.65708	5.97507	5.86137	6.13013	5.85741	5.83041	5.56225	6.03308	5.82006	6.00803	5.77936	6.20798	6.08498	5.63172
Olfr700	4.56305	4.78684	4.45119	4.8603	4.69722	5.0122	5.09386	4.7415	4.61551	4.78566	4.80139	5.30801	4.89616	4.79525	4.68707	5.02982	4.89987	4.67082	4.49072	5.13945	4.71714	5.23746	4.66846	4.52265	4.87348	4.87169	4.49132	4.63565	4.88425	4.89115	4.85425	4.6628	4.67144	4.91473	4.60284	4.85086	4.60477	4.91912	4.91969	4.90799
Olfr701	3.56995	3.7598	3.68556	3.74414	3.50303	3.59888	4.01261	3.84541	4.10008	4.03828	4.0715	3.76243	3.57184	3.95676	4.14795	3.69562	4.12496	4.49874	4.18124	4.70143	4.07937	4.58423	3.60892	3.66444	3.52467	4.05494	3.98449	3.94548	3.68523	3.56384	3.76036	3.45053	3.72013	3.94548	4.29624	3.84924	3.94471	4.32977	3.88596	4.05595
Olfr702	3.72832	3.69743	3.63965	3.74354	3.55099	3.58615	3.86229	4.28862	3.89519	4.00857	3.92828	4.32995	3.5642	3.70146	3.91516	4.12178	3.7359	3.8117	3.96544	4.16062	4.08479	3.9797	3.50459	3.52509	3.46213	3.88473	3.68993	3.68291	3.94635	3.47152	3.58354	3.77732	3.36631	3.91458	4.03305	3.68936	3.9729	3.97086	3.79316	3.84714
Olfr703	4.33046	4.57848	4.51568	4.36191	4.45495	4.20465	4.63822	4.67211	4.81884	4.83216	4.57198	5.05077	4.36254	4.62212	4.25412	4.45005	4.46072	4.84025	4.47743	4.57198	4.27509	4.59761	4.5303	4.37603	4.61267	4.85346	4.42365	4.63959	4.69236	4.75345	4.57198	4.76312	4.81696	4.53789	4.71522	4.80702	4.67958	4.5655	4.80376	4.59083
Olfr704	4.16452	4.01059	4.02656	4.39536	3.93468	3.96238	3.78668	4.09968	4.20148	3.65721	3.87662	4.64407	4.10338	4.39398	4.03714	4.66833	4.11091	4.37734	4.51522	4.0785	4.46143	4.46891	4.26791	3.87612	3.98816	4.31367	4.07282	4.37249	4.94885	4.1622	3.99692	4.2317	4.00879	4.05047	4.30505	4.2286	4.20851	4.4041	4.84865	4.23763
Olfr705	4.40615	4.07442	4.21178	4.30673	4.1407	4.03324	4.22348	4.22627	3.65834	3.96042	4.09416	4.06454	3.67357	4.16018	4.23781	3.88905	4.16529	4.42543	4.30534	4.57738	4.25661	4.23776	4.02869	3.966	4.09732	4.40828	4.38421	4.20765	4.62836	3.94012	4.39109	3.9431	4.18797	4.52613	4.20765	4.32613	4.29401	4.80387	4.54523	4.21337
Olfr706	4.91356	5.09943	4.69826	4.68216	4.80473	4.62196	4.83989	4.4766	5.12679	5.20878	4.63858	4.91509	4.68216	4.43922	4.8435	4.5695	4.6261	4.26558	4.39283	4.43261	4.46892	4.63455	4.68745	4.68453	4.70368	4.44215	4.62284	4.6366	4.54301	4.65243	4.42108	4.72156	4.77741	5.02256	4.9879	5.0268	4.54585	4.60882	4.86322	4.73461
Olfr707	4.05111	4.04706	3.76712	3.73076	3.7877	3.75652	3.32975	3.84321	3.94762	3.90987	3.63321	4.01184	3.50792	3.87125	3.83855	4.21125	4.47416	4.18774	4.12684	4.85852	4.25325	4.55791	3.90889	3.69764	3.8016	3.70775	3.89639	3.63883	4.15091	4.04918	3.89005	4.09352	3.93518	4.94188	4.44663	3.70528	4.04975	5.04711	4.15965	3.91649
Olfr71	6.90397	7.01716	6.89925	6.798	6.88541	6.63314	6.59263	6.40744	6.41612	6.29124	6.56752	6.41443	6.85784	6.06289	6.73795	6.65856	6.40529	6.49404	6.82538	6.7406	6.62731	6.70952	7.07863	6.94449	6.84264	7.44351	6.79225	7.01387	7.37911	7.2866	7.06855	7.14674	6.94677	7.6572	7.27995	7.22072	7.06234	6.95926	7.25126	7.01863
Olfr710	5.30773	5.18065	5.18941	5.27874	5.01971	4.86866	4.61346	4.99961	4.95956	4.73263	4.74403	4.98085	4.98902	4.66286	4.59994	4.88049	4.68308	4.81477	4.9889	5.07522	5.26961	4.83441	5.05095	4.89361	4.86045	5.11108	4.98696	5.05033	5.02076	5.09312	5.0962	4.96965	4.80699	5.37515	5.16337	5.23258	5.34433	4.7419	5.13751	5.22041
Olfr711	5.03457	5.03304	4.69697	5.11329	4.90607	4.52003	5.06867	4.83887	4.67238	4.90497	4.67911	5.02578	4.98544	4.57883	5.03548	4.62956	5.18717	4.84262	5.08345	4.52291	4.91377	4.81877	4.99542	5.0166	5.00287	5.55708	4.72612	4.96617	5.06449	5.17521	5.01849	5.161	5.10222	5.18717	6.20588	5.40468	5.29215	5.03583	5.50325	5.16336
Olfr713	5.4137	5.11909	5.12711	5.16794	5.07094	5.2408	4.98944	5.60199	5.32486	5.32283	5.59926	5.25994	5.43577	5.51573	5.44914	5.32381	5.47281	5.50544	5.24948	5.73098	5.24704	6.14736	5.00655	4.99712	4.98466	5.71821	4.93466	5.13668	5.59477	5.0873	5.32891	5.12816	5.21189	4.86752	5.59804	5.27142	5.28677	5.5119	5.35341	5.62072
Olfr714	5.25678	5.00871	5.28491	5.4052	5.09086	5.13161	4.99784	4.92446	5.02902	4.33494	4.54351	3.99518	5.15445	4.72579	4.41795	4.66914	4.80508	4.48971	4.4866	5.28608	4.59285	4.58281	5.02589	5.00906	5.04874	5.38799	4.9994	5.09454	4.8012	5.37281	5.32469	5.17192	5.0926	5.26258	5.38799	4.57037	5.44953	5.87316	5.00616	5.62384
Olfr715	4.0005	3.95474	3.97517	3.80971	3.79145	3.64532	3.99286	3.66232	4.54104	4.25342	3.90744	4.6304	3.38898	3.64096	3.52508	4.20907	3.73443	3.87528	3.67391	3.89508	3.45931	3.81671	3.43855	3.51689	3.4989	3.62687	3.49096	3.69257	3.91345	3.72565	3.55572	3.60549	3.60059	4.56723	3.90018	3.73183	3.64381	3.83007	3.32148	3.87396
Olfr716	4.16807	4.53919	4.36958	4.21173	4.14369	4.31206	4.30015	4.46567	4.19768	4.60676	4.1622	4.36669	4.37103	4.07265	4.49256	4.34162	4.76888	4.30015	4.54585	4.09015	4.19624	4.33112	4.28511	4.4526	4.26158	4.71526	3.89844	4.19483	4.3727	4.46119	4.10946	4.36237	4.05266	4.42638	3.74526	4.05979	4.62534	4.75014	4.39802	4.30015
Olfr720	4.82401	4.78886	4.5591	4.65252	4.41969	4.60364	4.53972	4.72215	4.64037	4.54765	4.63613	5.37505	4.4008	4.15964	4.13017	4.57765	4.20015	4.36712	4.68226	4.98574	4.29062	4.53482	4.76003	4.37859	4.56502	5.22235	4.44925	4.60142	4.2749	4.54765	4.56298	4.62367	4.56655	4.63903	4.88079	4.59699	4.96255	4.32984	4.78637	4.54204
Olfr722	3.14913	3.10911	3.05879	3.05687	2.88744	2.97384	3.17496	3.08674	3.21392	3.32984	3.26546	4.25506	3.23262	3.42061	3.18173	3.27472	3.80975	3.36206	3.26996	3.6531	3.30722	3.76143	3.03476	3.03364	2.96715	3.06276	3.05099	3.07692	3.25842	2.9752	2.94349	3.03339	2.95992	3.71994	3.35221	2.94081	3.04199	3.10392	2.87661	3.1967
Olfr723	5.22486	5.06155	5.10664	5.23482	4.95509	4.96065	5.07151	5.52749	5.44567	5.23716	4.82687	5.34733	5.10451	4.90428	4.8626	4.96592	5.27506	4.84272	5.02642	4.91885	4.86262	5.21016	4.60535	4.71853	4.86753	5.00175	4.84268	5.04547	5.18514	5.31346	4.83858	5.04849	4.86429	4.69737	4.86586	4.93422	4.89506	4.94374	4.88722	4.72466
Olfr724	5.22486	5.06155	5.10664	5.23482	4.95509	4.96065	5.07151	5.52749	5.44567	5.23716	4.82687	5.34733	5.10451	4.90428	4.8626	4.96592	5.27506	4.84272	5.02642	4.91885	4.86262	5.21016	4.60535	4.71853	4.86753	5.00175	4.84268	5.04547	5.18514	5.31346	4.83858	5.04849	4.86429	4.69737	4.86586	4.93422	4.89506	4.94374	4.88722	4.72466
Olfr725	3.85974	4.0083	3.78919	3.79347	3.7613	3.5395	4.23632	4.20314	3.60039	3.99429	4.10929	4.76326	4.11344	4.09766	4.28566	3.86458	4.20692	4.07548	4.16823	4.45903	4.34904	4.34098	3.84645	3.86975	3.72751	4.31766	3.68235	3.8601	3.90292	3.61622	3.62784	3.81897	3.64379	4.90071	4.21134	3.88264	4.30279	4.58039	4.15235	4.27331
Olfr726	3.52606	3.50852	3.4306	3.64147	3.59434	3.33734	3.95379	3.93822	4.32711	4.08488	4.09879	4.18301	3.73153	4.29615	3.70341	4.08558	4.17804	4.07116	3.95632	4.5291	3.90101	4.4166	3.39646	3.44842	3.39389	3.85739	3.60238	3.51818	3.87091	3.46394	3.48339	3.55503	3.39311	4.93147	3.79413	3.85241	3.8247	3.7817	3.89445	3.54367
Olfr727	3.65616	3.8452	3.7904	3.64592	3.32745	3.35442	3.45774	3.26756	3.51459	3.58543	3.21752	3.667	3.23262	3.58543	3.62674	3.50947	3.7315	3.56042	3.28343	3.53738	3.53764	3.94199	3.40634	3.48039	3.45726	3.46799	3.58173	3.34383	3.87504	3.57649	3.51843	3.4777	3.29287	4.0728	4.38561	3.38908	3.53674	3.64832	3.58543	3.519
Olfr728	4.47209	4.33638	4.42385	4.29372	4.40126	4.20908	3.90551	4.16816	3.97462	4.09873	3.76839	4.42841	4.14377	4.14244	3.91004	4.07463	3.95105	4.38413	3.87297	4.16779	4.05419	4.45767	4.0367	3.77261	3.97485	4.38727	3.90702	4.31453	4.48357	4.15507	4.07805	4.19887	4.22632	4.1849	4.30913	4.67724	4.56588	4.63567	4.1849	4.19556
Olfr729	3.71896	4.02829	3.70845	3.66319	3.46127	3.76195	3.73046	3.67904	4.20133	3.75961	3.61125	4.16077	3.52202	3.71778	3.79362	3.66626	3.96602	3.797	3.46904	4.22182	3.648	4.20649	3.71181	3.66637	3.54317	3.71346	3.7172	3.5718	3.7462	3.51572	3.55655	3.72519	3.57239	3.86435	3.78212	3.99658	3.90811	3.36963	4.011	3.54667
Olfr73	4.43715	4.45175	4.64771	4.28854	4.52118	4.12918	4.61127	4.9114	4.52427	4.36441	4.96959	4.97822	4.10116	4.13361	4.34977	4.56384	4.53888	4.57849	4.1833	4.75363	4.61031	5.23434	4.32578	4.28842	4.32962	4.55033	4.5475	4.43891	4.42746	4.45607	4.28921	4.7244	4.34166	4.77003	4.68689	5.29454	5.07652	5.24822	4.58535	5.1945
Olfr730	4.24278	4.32113	4.34082	4.2222	4.07927	4.40201	4.12237	4.12273	4.69393	4.3661	4.25276	4.63856	4.47545	4.19546	4.27986	4.40674	4.06444	4.5175	3.88112	4.8401	3.91391	4.96887	3.87382	3.85073	4.06497	3.96469	3.88112	3.76955	4.32225	4.39247	4.13062	4.21952	4.07926	4.52504	4.31855	4.57449	4.47745	4.50432	3.96912	4.18528
Olfr731	4.1371	3.9748	3.94879	4.01253	4.07394	3.85537	3.3967	3.49854	3.76035	3.62226	3.63221	3.66278	3.59999	3.72951	3.79807	3.40498	4.0593	3.84879	3.60354	4.16264	4.1236	4.43759	3.84879	3.57604	3.76644	3.85421	3.87551	3.66588	3.67384	3.78133	3.70824	3.54407	3.73143	3.99208	3.95607	3.84879	3.85357	3.521	3.89798	4.11327
Olfr732	4.21268	4.2617	4.24992	4.26487	4.12478	4.08614	3.66487	3.59641	3.71152	3.9439	3.78437	3.94088	3.56917	4.10173	3.567	3.787	4.37154	3.9211	3.51476	3.691	3.66604	3.96042	3.84913	3.67084	3.86673	3.88542	3.92858	3.83677	3.87282	4.04725	3.9214	3.73933	3.63294	4.17947	3.94037	4.19712	3.86147	3.84913	3.92079	4.06944
Olfr733	4.50525	4.14124	4.04098	4.15328	3.9625	3.87369	3.90873	3.90821	3.98569	3.84305	3.95443	4.04161	3.95198	4.05712	3.95198	3.79396	3.8736	4.06918	3.97454	3.80437	3.60421	3.73142	3.75832	3.67768	3.79158	4.19509	3.9234	3.91542	4.01625	4.12712	3.97355	3.73929	3.94376	4.12449	3.93319	4.37663	3.99314	4.02538	3.99549	3.69456
Olfr734	4.84822	4.86785	4.68128	4.49713	4.52273	4.72997	4.38194	4.54548	4.45236	4.44625	4.47324	4.61388	4.5748	4.55379	4.94158	4.87438	4.76601	4.11022	4.36789	4.2222	4.0622	4.53543	4.61722	4.65406	4.5851	4.73784	4.95292	4.72265	4.91621	5.06039	4.6849	4.54419	4.3618	5.41754	4.8317	4.92467	4.99338	4.62318	4.83274	4.75903
Olfr735	4.21117	4.43952	4.26522	4.49592	4.41074	4.15962	4.41277	4.50039	4.08087	4.26629	4.56842	4.61879	4.58408	4.41985	4.28471	4.48073	4.64925	3.98962	4.49939	4.34726	3.93016	4.35586	4.45384	4.07965	4.35826	4.58695	4.35908	4.23236	4.45471	4.70747	4.49653	4.55372	4.47491	4.5678	4.75944	4.54031	4.35684	4.5544	4.57692	4.45498
Olfr736	5.03048	4.81853	4.87981	4.66666	4.73385	4.71472	4.66835	4.59329	4.71304	4.63482	4.69328	5.21331	4.7079	4.86678	4.75039	4.90634	4.80969	5.01016	5.00138	4.55577	4.53691	4.75536	4.71767	4.77852	4.92935	5.14804	4.92684	4.68026	5.19176	4.76288	4.68479	5.17773	4.71243	5.13082	4.94875	5.25678	4.88763	4.86196	5.13963	4.89715
Olfr738	4.66981	4.99834	4.68226	4.98319	4.69533	4.67154	4.50283	5.02919	4.41107	4.81479	4.79389	4.97078	4.7307	4.58792	4.62073	4.66697	4.75829	4.55916	4.85345	5.08498	4.54929	5.02105	4.63432	4.47211	4.53056	4.50097	4.53281	4.53505	4.62885	4.87267	4.826	4.61899	4.57466	5.1175	4.92891	4.88864	4.509	4.28538	4.54582	4.43951
Olfr739	3.05951	3.04457	3.05432	2.89034	2.87969	2.95894	3.42719	3.3874	3.24887	3.64562	3.58815	4.56851	3.39598	2.85488	3.2811	3.30945	3.21541	3.5265	2.985	3.55506	3.15016	2.87017	2.90953	2.9419	3.00055	3.64077	3.22923	2.85236	2.83791	3.40243	2.76138	2.91952	3.0158	2.8545	3.236	3.13529	3.6887	2.97853	3.04671	3.21297
Olfr74	4.25293	4.06733	4.30015	4.23952	4.11104	4.30541	4.2862	4.28342	4.44839	4.15544	4.30015	4.49165	4.24729	4.166	4.33979	4.48013	4.22932	4.28283	4.54056	4.25318	4.14981	4.08281	4.30015	4.1715	4.16857	4.66747	4.4185	4.01228	4.37316	4.35467	4.22278	4.49037	4.27392	4.31991	4.44657	4.3951	4.70061	4.34003	4.48684	4.09243
Olfr740	4.42379	4.30789	4.16139	4.16687	4.12478	4.08125	4.18236	4.64803	4.47038	4.31782	4.50156	4.38133	4.51332	4.35808	4.56054	4.94554	4.67268	4.47038	4.36398	4.4449	4.45833	4.70069	4.41705	4.2706	4.21592	4.31186	4.63458	4.30096	4.51218	4.69056	4.30604	4.47038	4.19823	5.04598	5.00995	4.62353	4.79714	4.82725	4.51809	4.5641
Olfr741	4.26362	4.49125	4.49375	4.4568	4.30458	4.40807	4.42031	4.61221	4.55925	4.46237	4.53781	4.61648	4.36233	4.48702	4.23054	4.97205	4.67471	4.56256	4.2457	4.74151	4.50474	5.14646	4.48637	4.1204	4.3332	4.63385	4.65007	4.50866	4.32781	4.53534	4.43255	4.52901	4.39213	4.83739	4.78606	4.55626	4.49666	4.76322	4.72074	4.70218
Olfr742	3.29683	3.03031	3.12511	3.08729	3.1037	3.11106	3.31338	3.365	3.8414	4.03542	3.4612	4.85505	3.01936	3.43946	3.43148	3.43478	3.14415	3.86338	3.25687	3.42496	3.13978	3.36001	3.21448	3.1858	2.87015	3.2423	3.15026	3.07684	3.72277	3.61287	3.03306	3.01241	2.85565	3.0163	3.43424	3.06551	3.23093	3.48999	3.21803	3.1232
Olfr743	3.98405	4.12244	4.08818	4.07565	3.95991	3.92107	4.03349	4.20285	5.0414	4.57159	4.13504	5.91037	5.16126	4.61533	4.68303	4.37081	4.54523	4.72353	4.50776	4.72871	4.41692	4.33594	3.67681	3.6743	3.79192	4.10129	3.80805	3.90194	4.07436	3.77234	3.55174	4.03849	3.8226	4.53378	4.92421	4.12302	4.31954	4.2227	3.84378	4.08056
Olfr744	5.05954	5.56188	5.68256	5.13765	4.69333	5.05374	5.04922	4.73965	5.44826	5.02341	4.41429	4.56956	5.19438	4.84104	4.80497	5.83083	4.91261	5.15345	5.07429	5.34924	5.10267	5.27379	5.27226	4.89899	5.12473	5.14687	4.87779	4.56483	5.01109	5.22528	4.8564	4.89601	4.87911	5.20175	4.77998	5.28058	5.1067	5.16558	5.41626	5.00592
Olfr745	5.2855	5.50829	5.49288	5.22785	5.26749	5.17478	5.46186	5.42627	5.46904	5.18364	5.52256	5.83619	5.10082	5.18949	5.0313	4.96119	5.08611	5.076	5.42459	5.20063	4.87193	5.31207	5.13748	5.24997	5.2841	5.4515	5.11231	5.06155	5.55919	5.67477	5.06896	5.2841	5.26912	5.32751	5.31778	5.59169	5.59237	5.22601	5.55796	5.16208
Olfr746	3.6702	4.04101	3.63915	3.72022	3.80533	3.86711	3.86236	3.93632	4.07589	4.10132	3.69268	4.08939	3.6343	3.71583	3.96107	3.639	3.51461	3.69272	4.19229	4.29933	3.75233	4.62408	3.59884	3.4444	3.55778	3.66967	3.70818	3.40452	3.4431	3.84408	3.75406	3.58143	3.78093	3.53419	4.37444	3.86216	4.4046	3.94638	3.3661	3.76893
Olfr747	3.12983	3.2118	3.35507	3.53466	3.12944	3.11893	3.14665	3.30443	3.24289	3.17265	3.16071	4.14784	2.94422	3.37689	3.37228	3.06032	3.47667	3.74647	3.77051	4.15675	3.72517	4.0203	2.99051	3.32323	3.1553	3.30634	3.41615	3.28774	3.75106	3.4229	3.07724	3.03038	3.22365	3.48266	3.49768	3.15781	3.30875	3.35994	3.45267	3.4678
Olfr748	3.88605	3.86687	3.68346	3.90955	3.68158	3.51016	3.57871	4.06353	3.99737	3.66323	4.28636	4.02248	3.36578	3.42576	3.66057	3.32516	3.44644	3.32752	4.322	4.0258	3.63902	4.14863	3.60749	3.43096	3.89549	3.93918	3.72691	3.93531	3.90694	3.764	3.59857	3.8751	3.85361	4.15486	4.3008	3.83462	3.98013	4.19118	3.86344	4.04155
Olfr749	3.15634	3.24368	3.46233	3.17021	3.18673	3.51087	3.20453	3.59895	3.34897	3.33206	3.11738	3.64558	3.30304	3.67222	3.476	3.65258	3.48835	3.42912	3.54288	4.1374	3.29371	3.91655	3.36841	3.2424	3.08527	3.24722	3.54425	3.45027	3.4901	3.20119	3.24579	3.38742	3.09295	3.75611	3.30156	3.51751	3.48193	3.53451	3.09807	3.18773
Olfr750	5.43988	5.49348	5.43453	5.48653	5.25158	5.28597	5.43676	5.57061	5.78561	5.48822	5.77663	5.58474	5.35434	5.04423	5.22206	5.10378	5.2255	5.16116	5.0676	5.71116	5.24311	5.82846	5.32264	5.31036	5.48944	5.57551	5.33755	5.22333	5.53401	5.27011	5.45626	5.105	5.38136	5.68716	4.88987	5.70892	5.12946	5.3177	5.5319	5.84296
Olfr76	4.75533	4.88872	4.52416	4.88872	4.8103	4.59398	5.23222	4.88872	5.03415	5.04097	4.88367	5.89255	4.8047	4.86378	4.57111	4.83769	4.84713	4.49801	4.55424	5.13668	4.75025	4.77223	5.15446	4.94293	4.78493	5.8303	5.0588	4.82859	4.86378	4.72362	4.89211	4.85367	4.94086	5.17649	4.39435	5.09484	4.98505	5.07767	4.96174	4.97569
Olfr761	4.13355	3.88789	3.91308	4.169	3.92951	3.85177	3.92273	4.24546	3.95457	4.25175	4.13335	4.88219	4.35065	4.31838	3.98943	4.41477	4.05936	4.3071	4.33568	4.29678	3.94498	4.23202	3.7907	3.79614	3.83874	3.86292	3.77863	3.6394	4.22567	3.72456	3.88076	3.60825	3.61218	3.852	4.39076	3.73647	3.84525	4.28904	3.78994	3.7646
Olfr763	4.80749	4.36791	4.69431	4.32206	4.58538	4.37894	4.9217	5.30031	5.13066	5.10665	4.95772	4.82909	4.88691	3.99243	4.63237	4.56869	4.46653	4.40523	4.79595	4.97032	4.38723	4.9156	4.68207	4.46536	4.31035	4.99542	4.49851	4.51729	4.60167	4.60207	4.22697	4.38726	4.37024	5.20407	5.05758	4.56563	4.67523	5.35206	4.8591	4.93217
Olfr765	5.23839	5.14577	5.34226	4.90816	4.9873	4.90908	5.60105	5.01575	5.39666	5.12101	4.98059	5.43757	5.13333	4.73883	5.54761	5.21462	5.37468	5.43511	4.86139	4.73564	5.01344	4.94538	5.65619	5.17633	4.94242	5.35208	5.08394	5.13333	4.94252	5.65928	5.20117	5.25042	5.2654	5.15069	5.14559	5.64967	5.52852	5.13601	5.13333	4.95834
Olfr767	8.07984	7.8204	8.20922	7.99732	8.25144	7.82931	6.69926	6.24691	6.44383	6.32001	6.18461	6.40744	5.43393	5.73179	5.35962	5.84868	5.83684	5.97962	5.39299	5.9715	5.88307	5.03537	7.92619	7.86014	7.96411	8.19623	6.96649	7.30677	5.95479	7.40113	7.11417	7.18933	7.08996	6.46507	7.2975	7.55915	7.15906	9.08876	7.5646	7.46758
Olfr768	2.91367	3.11514	3.14072	2.96856	3.11449	3.0594	3.10674	3.09882	3.27448	2.91538	3.08921	2.92577	2.86589	3.4812	3.15816	3.44494	3.27202	3.44816	3.42502	4.2266	3.48241	3.6398	3.12666	3.1261	3.15707	3.28217	3.13102	3.06807	3.55166	3.38508	3.0772	3.45596	2.99093	4.08361	3.62636	3.05179	3.29653	3.61196	3.35953	3.25783
Olfr769	4.42495	4.27983	4.40763	4.47685	4.36883	4.14357	4.78365	4.76804	5.14831	4.9092	4.55389	5.33783	4.30141	4.55465	4.26036	4.75248	4.46787	4.85816	4.60254	5.23029	4.49279	5.03539	4.17718	4.21191	4.1112	4.76938	4.19198	4.33103	4.28945	4.40383	4.34426	4.20397	4.18633	4.396	4.80365	4.5589	4.99245	5.01541	4.35561	4.61382
Olfr77	3.8318	3.81365	3.81827	3.89304	3.65247	3.60285	3.74738	4.08701	4.4702	4.16243	3.89824	4.95853	3.73934	3.86324	3.65165	4.09061	3.96147	3.73503	3.62441	3.77938	3.78393	3.95966	3.62905	3.62962	3.6947	3.8197	4.0701	3.85322	3.88564	4.04835	3.98566	4.06203	3.83414	4.19553	3.86406	4.00156	4.21163	4.03079	4.05205	3.88985
Olfr770	5.21549	5.23538	5.17847	4.77573	4.97821	5.14416	4.96696	5.08869	4.95008	4.92242	4.65611	5.25955	4.98189	4.3681	5.08197	4.88392	4.88816	4.79474	4.94793	4.91335	4.62564	4.93286	4.75052	4.80608	4.73255	5.33312	4.92045	5.15612	4.79156	5.07832	4.96797	4.92435	4.89098	4.91762	4.86608	5.08998	4.95724	4.82504	4.87965	4.89688
Olfr771	3.4561	3.32918	3.58492	3.66565	3.42942	3.47087	3.69873	3.65154	3.80007	3.70151	3.64317	3.96925	3.50071	3.50331	3.3159	3.41396	3.35745	4.15865	3.66386	4.06014	3.66938	3.93527	3.41732	3.52094	3.39951	3.75242	3.74713	3.50214	3.6881	3.62394	3.75829	3.82279	3.48232	4.42368	4.06882	3.65224	3.86896	4.30259	3.5372	3.82723
Olfr772	3.53603	3.46123	3.4445	3.33105	3.43454	3.36816	3.43495	3.75065	3.25975	3.41225	3.57002	3.67377	3.37212	3.13946	3.83203	3.5348	3.25246	3.93533	3.70359	3.37277	3.35764	4.06754	3.4113	3.44525	3.31912	3.7624	3.37195	3.76447	3.74712	3.62094	3.47622	3.44985	3.43417	3.22965	3.57248	3.78989	3.70273	3.67343	3.65284	3.80749
Olfr773	4.42639	4.46207	4.35719	4.04422	4.18643	4.18997	4.27037	4.13936	4.1359	4.33316	4.00588	4.18766	4.00843	4.2743	4.0537	3.97952	3.65311	3.90741	3.67828	4.06131	3.92271	4.78041	3.78814	3.74313	3.74745	4.19644	3.81554	3.75577	4.05983	3.77542	3.79898	4.01133	4.0212	4.42069	3.74611	4.05514	3.98432	4.33788	4.15203	4.0803
Olfr774	5.72467	5.86983	5.25046	5.36779	5.39251	5.36194	5.57134	5.39389	5.11725	5.52869	5.41433	5.28513	4.93671	5.16856	5.31632	5.24115	5.30245	5.47699	5.19122	5.4398	4.93754	5.20771	5.01274	4.98674	5.058	5.23109	5.05993	5.24756	5.10448	5.39102	4.86676	5.18925	5.04887	5.00382	5.53801	5.33989	5.75328	5.36659	5.44478	4.95863
Olfr775	4.19913	4.03216	3.85552	3.91591	4.15549	3.76506	3.74381	4.13556	3.83126	3.90184	3.75031	4.34125	3.73717	3.66966	3.50149	4.05758	4.03251	3.99326	3.58927	4.10997	3.9883	4.18655	3.70015	3.64733	3.66958	3.9112	3.71523	3.4892	3.68372	3.60924	3.90724	3.71351	3.68982	4.89057	4.17956	3.93698	4.25192	4.38216	4.06473	4.11121
Olfr776	3.3085	3.83458	3.70572	3.26026	3.38823	3.47043	3.7753	3.87799	4.45869	4.0922	4.28179	5.38631	3.51032	3.48284	3.27006	4.06409	3.01072	3.30598	3.79279	4.06486	3.87442	4.91568	3.1364	3.12876	3.00276	3.20327	3.48284	3.3383	3.18915	3.1045	3.14267	3.19025	3.06347	3.02814	3.48037	3.39937	3.62202	3.50666	3.28302	3.35812
Olfr777	3.67596	3.52197	3.60099	3.68099	3.52008	3.74004	3.67819	3.37337	3.54037	3.52885	3.47582	4.00431	3.64462	3.63503	3.22046	3.72203	3.46084	3.18527	3.76797	3.52885	3.37489	4.03691	3.41706	3.3692	3.24679	3.49776	3.26378	3.57383	3.15572	3.61256	3.58397	3.39484	3.36848	4.64568	3.00697	3.53425	3.3177	3.79316	3.12497	3.4678
Olfr78	3.7861	3.7563	3.76624	3.74355	3.68501	3.64408	3.61593	3.80391	3.71796	3.62772	3.75107	3.77966	3.60035	3.57886	3.66536	3.59816	3.67855	4.02369	3.89944	4.08966	3.73082	4.20897	3.58469	3.73159	3.72941	3.91177	3.72393	3.91239	3.96249	3.74509	3.75014	3.61901	3.72951	4.32478	3.97651	3.89078	4.0419	4.21372	4.14363	3.9234
Olfr780	3.92938	3.90909	3.90592	3.93121	3.82236	3.94296	3.65738	3.82239	3.6439	3.93259	3.91363	3.95733	3.82515	3.73488	4.01978	4.2508	4.15714	3.98962	4.49446	4.01185	3.94431	4.31173	3.93259	3.7539	3.79634	4.10193	3.97606	3.67666	4.06411	3.86998	3.78653	3.81683	3.8167	4.27735	4.11744	3.96002	3.94311	4.16238	4.01628	3.93259
Olfr781	3.28101	3.32361	3.47585	3.1298	3.49817	3.53692	3.49595	3.80512	3.56395	3.58693	3.40822	3.88772	3.39083	3.59977	3.4044	3.86816	3.77427	3.79561	3.51493	3.42795	3.7443	3.81371	3.35351	3.26185	3.1543	3.38909	3.58805	3.31132	3.55018	3.45043	3.34382	3.29558	3.10659	4.18035	4.27301	3.41682	3.68456	3.7044	3.49393	3.62825
Olfr782	3.77205	3.86478	3.80174	3.79145	3.70842	3.62207	3.66311	3.79604	3.915	4.05777	3.98832	4.51449	3.52179	3.76967	3.74771	4.60301	3.84465	4.36225	3.63579	4.88992	3.8407	4.81874	3.62138	3.6618	3.52479	3.99318	3.80304	3.49339	3.75174	3.86077	3.84491	3.55585	3.71924	3.91142	4.35113	3.77169	3.91142	4.36363	3.86498	4.01104
Olfr784	4.30185	4.28158	4.17804	4.34083	4.36274	4.34665	4.67741	4.65567	4.71792	5.39229	4.86798	5.51765	4.42904	4.36895	3.99636	4.34553	4.76144	4.15844	4.58424	5.27687	4.5101	5.37649	4.02689	4.21711	4.15987	4.8871	4.38795	4.26507	5.05658	4.34887	4.32166	4.57165	4.23359	4.68849	5.03361	4.22911	4.77892	4.75746	4.52245	4.29814
Olfr786	3.71048	3.67078	3.71048	3.8886	3.64413	3.51274	4.47151	3.78442	4.53045	4.37185	4.33266	5.57355	3.85977	3.69759	3.95995	3.75161	4.06238	3.87516	4.07819	3.42139	3.48281	3.97338	3.69145	3.54748	3.69672	4.11718	3.56661	3.94279	3.54577	4.05773	3.67393	3.91053	3.76173	4.01213	3.71372	3.72505	3.69932	3.8015	3.86489	3.86207
Olfr787	3.52832	3.27644	3.87129	3.6877	3.3017	3.38328	3.1439	3.54714	3.07096	3.29251	2.88355	4.14665	3.30232	3.00425	3.33139	2.74789	2.96518	3.77721	2.88829	4.27892	3.44396	4.28088	3.13022	2.92601	2.91313	3.03884	3.64307	3.058	3.23235	3.17512	3.30943	3.12019	2.88044	3.44594	4.05195	2.87929	3.42233	3.41561	3.12396	3.54367
Olfr788	4.60136	4.22329	4.34239	4.44332	4.29763	4.53293	5.28026	5.44294	5.36792	5.21456	5.0595	5.51597	4.78147	4.62062	5.06798	4.74221	4.46022	5.00439	4.59577	4.86142	4.35747	4.76933	4.45845	4.38667	4.28146	4.57602	4.4502	4.50356	4.67411	5.26768	4.53285	4.52244	4.48673	5.05481	4.55785	4.75277	4.648	4.61588	4.6261	4.98792
Olfr790	4.50416	4.69191	4.4401	4.67898	4.35095	4.43194	4.69661	4.66309	4.81564	5.04067	4.75973	4.92799	4.42971	4.64858	4.88255	5.48433	4.80717	5.18923	4.79825	4.91058	4.60734	5.00434	4.32443	4.20283	4.28412	4.59359	4.46288	4.50408	4.52001	4.43156	4.24085	4.58747	4.39836	4.72435	4.73107	4.33219	4.6743	4.65323	4.60071	4.46537
Olfr791	3.53652	3.50806	3.53389	3.56993	3.55524	3.5809	4.01876	3.74941	4.12801	4.16399	3.8571	4.39573	3.8703	3.80149	3.97622	3.97471	3.66566	4.20382	4.27998	4.03548	3.74941	3.726	3.81151	3.65876	3.6174	3.73457	3.58666	3.5003	3.71968	4.26946	3.83068	3.74257	3.63799	4.18866	3.9525	3.74671	3.68942	3.75637	4.17601	3.93259
Olfr792	3.51804	3.46977	3.74471	3.32312	3.55361	3.2674	3.40263	3.44327	3.342	3.23607	3.36407	3.25843	3.28411	2.94938	3.46977	3.66258	3.86888	3.45855	3.97489	3.29995	3.15253	3.50459	3.34782	3.15702	3.46977	3.22181	3.38389	3.71496	3.44238	3.83509	3.75779	3.35338	3.29979	3.77682	3.99708	3.65422	3.35002	3.62894	3.3238	3.1213
Olfr794	4.22468	4.15215	4.39418	4.01351	4.20834	4.13752	4.71714	4.35739	4.51255	4.3691	4.46155	4.50912	4.21589	4.29188	4.5077	4.54344	4.699	3.98962	4.36077	4.39007	4.3576	4.50677	4.09334	4.02558	4.36005	4.38365	4.11009	4.30216	4.3369	4.27572	3.90312	4.29909	4.22189	4.74863	4.22645	4.11542	4.39024	4.35141	4.35975	4.11518
Olfr796	5.65569	5.56919	5.35178	5.1788	5.42183	5.44779	5.77429	6.01167	5.80803	5.95504	5.73928	6.21897	5.49933	5.92985	5.4239	5.54633	5.57311	5.54279	5.69095	5.70363	5.76769	5.79084	5.8246	5.46217	5.28948	5.88073	5.91749	5.72904	5.78557	5.78008	5.69604	5.72048	5.58627	6.0299	5.92967	5.81139	6.22517	6.36409	6.10569	5.9742
Olfr798	3.08329	3.28985	3.6736	3.12715	3.25154	3.39498	3.44062	3.05315	3.14593	3.67592	3.4529	4.27871	3.5711	3.19193	4.18102	3.95135	3.17068	3.98962	3.06192	4.30503	3.45762	4.49811	3.21639	3.39312	2.94687	3.46755	3.04211	3.47869	3.48044	3.12304	3.12576	4.03079	3.07506	4.69941	3.70764	3.37169	3.53376	3.72755	3.03693	3.85552
Olfr799	3.82677	3.6384	3.84529	3.8197	3.40867	3.63388	3.80209	3.75734	3.97103	4.35391	3.66214	5.20177	3.82426	4.20145	3.88197	3.78702	3.90444	4.21657	3.81039	3.76512	4.16537	4.35964	3.49246	3.49765	3.56249	3.83561	3.75137	3.59835	3.92186	3.94474	3.61008	3.8197	3.50385	4.233	4.19754	3.69316	3.95768	3.84435	3.77211	4.1385
Olfr8	3.24842	3.02536	3.0536	3.1578	3.10462	2.95244	4.08273	3.61625	3.86653	4.08129	3.54521	4.51715	3.19581	2.93468	3.65601	3.50477	3.40431	3.51049	3.27712	3.76218	3.48095	3.69614	2.95178	2.86128	3.05217	3.3383	3.20295	3.23529	3.55411	3.53156	3.20258	3.34142	2.96436	3.80993	4.11762	3.32998	3.04883	3.32093	3.12753	3.4297
Olfr800	3.67596	3.52197	3.60099	3.68099	3.52008	3.74004	3.67819	3.37337	3.54037	3.52885	3.47582	4.00431	3.64462	3.63503	3.22046	3.72203	3.46084	3.18527	3.76797	3.52885	3.37489	4.03691	3.41706	3.3692	3.24679	3.49776	3.26378	3.57383	3.15572	3.61256	3.58397	3.39484	3.36848	4.64568	3.00697	3.53425	3.3177	3.79316	3.12497	3.4678
Olfr801	4.16287	3.97458	4.10367	4.15686	4.1569	4.03823	4.4762	4.69666	4.84036	4.79209	4.42941	5.31724	4.28733	4.07073	4.07465	4.20436	4.28733	4.49901	4.59284	4.34595	4.34849	4.62941	4.07485	4.15363	4.14088	4.54537	4.26577	4.48532	4.021	4.37214	4.24529	4.24445	4.33174	4.29839	4.26304	4.53491	4.00558	4.32064	4.66518	4.09344
Olfr802	3.61819	3.85192	3.71253	3.83483	3.52209	3.67886	3.9421	3.89466	3.95778	4.15925	4.06626	4.91255	3.85777	3.60524	4.26206	3.65557	3.61993	3.67492	3.57409	4.04249	3.67045	3.59453	3.42429	3.54295	3.38837	3.79743	3.58756	3.721	3.6274	3.97289	3.41702	3.66929	3.4397	3.58879	3.72023	3.65422	3.56702	3.8593	3.7445	3.62088
Olfr803	3.08404	3.1992	3.2823	3.69389	3.53565	3.27953	3.59648	3.73261	4.08	3.96528	3.44132	4.74771	3.51957	4.07429	3.76499	3.27706	3.55848	3.84798	3.66747	3.72054	3.50463	4.03889	3.09357	3.16253	3.26165	3.1548	3.51136	3.14884	3.12214	3.35932	3.19835	3.7689	3.37333	4.20866	3.53878	3.28798	3.37927	3.43519	3.27348	3.30854
Olfr804	3.77205	3.86478	3.80174	3.79145	3.70842	3.62207	3.66311	3.79604	3.915	4.05777	3.98832	4.51449	3.52179	3.76967	3.74771	4.60301	3.84465	4.36225	3.63579	4.88992	3.8407	4.81874	3.62138	3.6618	3.52479	3.99318	3.80304	3.49339	3.75174	3.86077	3.84491	3.55585	3.71924	3.91142	4.35113	3.77169	3.91142	4.36363	3.86498	4.01104
Olfr805	3.94928	3.73489	3.68351	3.68675	3.77359	3.58222	3.60869	3.88837	3.86676	3.96206	3.76328	4.18129	3.71221	3.89038	3.73653	3.72445	3.61852	3.78069	3.88237	4.02343	3.80809	4.01743	3.66064	3.49828	3.46313	4.12954	3.495	3.88817	3.82646	3.86624	3.5229	3.79597	3.57824	4.09892	3.55167	3.98532	3.95331	3.62655	3.6747	3.68333
Olfr806	2.85013	2.6652	2.78699	2.57051	2.8151	2.71614	3.22062	3.02656	4.03234	3.35713	3.43454	4.84392	3.16863	2.82565	2.98554	3.23455	2.72347	3.16294	2.85977	3.17574	3.10252	3.66389	2.84001	2.5445	2.68681	2.6767	2.90675	2.67272	3.33106	3.05894	2.93888	2.78925	2.61961	2.90581	2.92966	2.58188	2.98048	2.71299	2.70546	2.86954
Olfr807	5.54815	5.60823	5.67347	5.76383	5.50662	5.21025	5.87449	5.60358	5.36102	5.60859	5.22537	6.05768	5.40959	5.5495	5.44992	5.33107	5.30752	5.57185	5.7641	5.67758	5.53366	6.11517	5.60069	5.59541	5.59046	5.7132	5.66564	5.63231	5.63467	5.72004	5.64685	5.59619	5.36309	5.74352	5.57294	5.39707	5.77742	5.69566	5.78269	5.7138
Olfr808	4.4592	4.25353	4.35093	4.22359	4.20155	4.17072	3.81321	4.23227	4.00657	4.35709	4.46276	4.34168	4.15663	4.42131	3.82396	4.4451	5.06039	4.25352	4.49838	4.37122	4.4284	4.62061	4.03699	4.16444	3.93766	4.04607	3.76124	4.02952	4.37914	4.14776	4.01301	4.38428	3.88575	4.21982	3.9397	4.35661	4.26887	3.86839	4.53604	3.83196
Olfr809	3.2618	2.97932	3.18368	3.2842	3.20029	3.25342	3.27279	3.33248	3.81445	3.62798	3.34239	3.54842	3.38161	3.37549	3.29134	3.36525	3.40623	3.76304	3.62784	3.62308	3.48941	3.73903	3.32	3.1059	3.15248	3.3446	3.54494	3.54801	3.65898	3.36515	3.25827	3.39972	3.19607	4.09701	3.75215	3.44038	3.50479	3.70239	3.40029	3.59691
Olfr810	4.84208	4.71142	4.83224	4.60947	4.65499	4.83445	4.84927	5.32361	5.26764	4.95462	5.10437	5.42047	4.81479	4.83802	4.44859	4.79541	4.77185	4.87286	4.65391	4.9494	4.74671	4.82125	4.79387	4.70229	4.68699	5.36591	4.90497	4.94722	5.2856	5.06974	4.76978	4.91087	4.69576	5.12287	5.11951	5.19532	5.29483	4.86682	5.24464	5.07083
Olfr811	4.34146	4.26994	4.05512	4.23708	4.34706	4.62866	4.61047	4.60296	4.65068	4.51203	4.59935	4.79341	4.47204	4.7878	4.7556	5.24856	4.39092	4.95718	4.53037	4.97066	4.66579	4.99738	4.31605	4.31857	4.23137	4.27308	4.49785	4.41558	4.4895	4.30779	4.23217	4.31261	4.31488	4.61143	4.72661	4.6193	4.38407	4.69374	4.43223	4.49186
Olfr812	4.48704	4.4374	4.19801	4.34779	4.19972	4.26673	4.63249	4.96474	4.52087	4.94131	5.11939	4.68529	4.50538	4.24263	4.47905	4.406	4.43926	4.58918	4.28823	4.37747	4.27443	4.46224	4.20141	4.04067	4.04772	4.42335	4.03951	4.2666	4.58452	4.20188	4.37041	4.12303	4.28541	4.22213	4.11567	4.5528	4.34917	4.60453	4.23657	4.13484
Olfr813	3.53639	3.64505	3.64505	3.62944	3.63071	3.71096	3.79165	3.87622	3.80307	3.66043	4.24385	4.05778	3.71096	3.8821	3.77087	3.81807	3.92176	4.20851	4.01129	3.53682	3.47303	3.54785	3.54176	3.55849	3.61089	3.88996	3.78511	3.84817	3.81477	4.04435	3.58865	3.65612	3.47162	4.28218	3.99409	3.74296	3.86474	3.69572	3.90821	3.76351
Olfr814	2.99261	3.05273	2.90964	3.0726	2.81905	2.92925	3.27909	3.11718	3.24013	3.19296	3.0781	4.15984	3.49457	3.44617	3.5157	3.31347	3.3531	3.34736	3.49149	3.73044	3.86902	4.51744	2.93307	2.9887	2.92937	3.23593	3.0443	3.08813	3.75885	3.0291	3.07043	3.06119	2.98088	3.70209	3.63031	3.06163	2.89838	3.0643	3.07516	3.21787
Olfr815	2.92743	3.13119	3.07076	2.89034	3.02604	2.86777	3.2589	3.26457	3.68465	3.27007	3.08151	4.11095	3.19471	3.05761	3.24315	3.15275	3.31494	3.72476	3.14308	3.5111	3.33988	3.92225	2.93704	3.01409	2.99931	3.08309	3.08401	2.98791	3.59703	3.17509	2.98109	3.08618	2.95576	3.50205	3.46514	3.082	3.38039	3.18819	3.16362	3.2223
Olfr816	3.47326	3.35008	3.27984	3.48496	3.45042	3.29889	3.43362	3.66875	3.5617	3.93144	3.57865	4.06565	3.43881	4.04912	3.28484	3.75727	3.47138	3.56042	3.37434	3.5691	3.62602	4.17839	3.39571	3.39123	3.19087	3.54508	3.34377	3.44453	3.47138	3.71176	3.15509	3.24427	3.31456	3.98752	3.4965	3.49431	3.59591	3.62183	3.44785	3.65096
Olfr818	3.73625	3.98502	3.90877	3.78779	3.94555	3.78224	4.35045	4.58607	4.18191	4.87482	4.33398	5.66977	3.96632	3.94555	4.27949	4.16521	4.04341	3.94555	3.94555	4.12204	4.16076	4.38792	3.7026	3.88966	3.50168	3.82934	3.4846	3.80782	3.77161	3.91514	3.77078	3.88443	3.7194	4.02791	3.9146	3.73969	4.01626	3.86647	3.94946	3.93259
Olfr819	5.69493	5.67123	5.58799	5.47757	5.53389	5.33861	5.72835	6.278	6.27675	6.38948	5.84675	6.30976	5.36485	5.61593	5.07586	5.29652	5.42966	5.47731	5.37211	5.35684	5.30511	5.4539	5.12043	4.91428	4.9582	5.69211	5.09894	4.99959	5.35684	5.2497	5.05104	5.38733	5.03178	5.41028	5.27804	5.69845	5.6161	5.64884	5.27146	5.26685
Olfr820	3.49172	3.45902	3.50273	3.6872	3.48029	3.32252	3.50879	3.76562	3.70188	3.87521	3.75813	4.0934	3.70713	4.1271	4.08608	4.00772	3.60956	3.96167	3.54706	3.91672	3.53225	3.88162	3.53836	3.46452	3.34871	3.3787	3.60099	3.45105	3.72015	3.45043	3.27402	3.71421	3.48572	3.49411	3.73306	3.74035	3.4974	3.83317	3.45876	3.82757
Olfr821	4.24566	4.07149	4.13535	3.91747	3.83253	4.03859	3.94827	4.07521	3.85163	3.74626	4.21222	3.87373	4.11874	4.06437	3.79272	3.8156	4.15392	3.55912	3.87819	3.75541	4.14696	4.14684	3.65222	3.8907	3.82755	4.07687	3.88761	3.71069	3.9617	3.97136	3.96431	3.91248	4.08718	3.87864	4.45033	4.33381	4.13198	4.20574	3.94946	4.38083
Olfr822	3.67168	3.62176	3.69925	3.83359	3.55289	3.64698	3.99073	3.82694	3.92405	3.71565	3.62526	4.36859	3.86724	3.9352	3.89647	3.86639	4.07535	3.98962	4.00979	4.03066	3.58844	3.83792	3.49389	3.3636	3.48738	3.8072	3.8026	3.53194	3.90161	3.77886	3.89994	3.52715	3.4949	4.42281	3.78681	3.66177	3.79067	3.78203	3.52765	3.73695
Olfr823	3.58034	3.84286	3.66375	3.54272	3.29354	3.44474	3.51863	3.91364	3.6415	3.93865	3.92108	4.78555	3.07526	3.70749	3.38172	3.47147	3.4747	3.9388	3.58659	3.5752	3.52348	3.6688	3.36216	3.38339	3.13829	3.40492	3.28085	3.42031	3.7241	3.52885	3.39094	3.37338	3.41039	3.96293	3.9155	3.2442	3.40661	3.59014	3.33521	3.41373
Olfr824	3.58034	3.84286	3.66375	3.54272	3.29354	3.44474	3.51863	3.91364	3.6415	3.93865	3.92108	4.78555	3.07526	3.70749	3.38172	3.47147	3.4747	3.9388	3.58659	3.5752	3.52348	3.6688	3.36216	3.38339	3.13829	3.40492	3.28085	3.42031	3.7241	3.52885	3.39094	3.37338	3.41039	3.96293	3.9155	3.2442	3.40661	3.59014	3.33521	3.41373
Olfr825	4.02432	4.30217	4.34866	3.8856	4.25433	4.03238	4.29906	4.60171	4.57481	4.50831	4.60553	4.79955	4.06254	4.4187	4.03878	4.3348	4.25328	4.36488	4.51838	4.64616	4.40637	4.83362	4.09979	4.13266	3.95206	4.42612	4.44362	4.03215	4.16362	4.26236	4.08136	4.15458	3.98227	4.73898	5.15752	4.19615	4.16785	4.15852	4.10406	4.39045
Olfr826	3.20488	3.25615	2.84575	2.86404	2.95105	3.14417	3.05417	3.28132	4.06027	3.23628	3.44808	4.48973	3.38691	3.89259	3.35525	3.3306	3.32363	3.2853	3.86947	3.63704	3.25052	3.90768	3.11063	2.92429	3.01795	3.00283	3.26102	3.01241	3.64814	3.0985	3.04431	3.36848	3.01979	3.77403	4.01287	3.06963	3.21	3.48762	3.18277	3.87925
Olfr827	3.7782	3.6173	3.64584	3.68936	3.51124	3.49004	3.68723	3.74362	4.22705	3.77016	3.49278	4.31307	3.602	3.45878	3.37751	3.70683	3.6343	3.7976	3.29531	3.87227	3.74636	4.1556	3.30348	3.50247	3.49439	3.48677	3.44395	3.44391	3.80488	3.68254	3.30121	3.33741	3.42932	3.76873	3.55651	3.55584	3.69919	3.54111	3.62108	3.40909
Olfr828	3.65356	3.60424	3.69032	3.62602	3.65249	3.75205	3.83126	4.10497	3.70786	3.99956	3.8859	4.48816	3.49349	3.67418	3.92257	3.83126	4.29843	4.00736	3.96772	3.91436	3.7859	4.34096	3.64701	3.81549	3.63134	3.78988	3.75885	3.63813	3.87575	4.23161	3.81455	3.91476	3.83126	4.24084	4.06312	3.52866	3.73285	4.38622	3.77632	3.85552
Olfr829	4.03236	4.06838	4.06838	4.06838	3.71195	3.91424	3.76314	4.22647	3.59852	3.94349	4.02665	4.35953	3.83252	3.95768	4.1262	4.14354	4.19717	4.06838	3.79778	4.44534	3.90178	4.82317	3.7467	3.77073	3.84563	4.39099	3.99092	4.03998	3.76769	4.27685	3.79092	4.16009	4.06838	4.49452	4.14864	4.11853	4.26109	4.17966	3.76769	4.44188
Olfr830	4.00929	4.13598	4.49691	4.01032	3.93862	3.96256	4.08829	4.59424	4.78711	4.25276	4.32723	4.39998	4.09878	3.56821	3.96971	4.31835	4.57158	4.25808	3.92446	4.27828	4.19252	4.75219	3.8745	3.89356	3.79904	4.09309	3.84273	4.12703	4.35502	4.36794	3.93289	4.32984	3.81506	4.11535	3.90739	4.22087	4.36871	3.88659	3.85351	3.77974
Olfr832	3.20286	3.14395	3.27414	3.29279	3.18214	3.13135	3.19357	3.28111	3.26031	3.28178	3.21982	3.37429	3.27291	3.26719	3.25728	3.65645	3.75066	3.50104	3.34893	3.28942	3.49308	3.73058	3.15236	3.19361	3.18525	3.66065	3.17658	3.35474	3.33248	3.33857	3.29695	3.29375	3.12678	4.11451	3.72127	3.23903	3.51402	3.59135	3.32714	3.4174
Olfr834	2.94297	2.97958	2.95252	2.95582	2.91528	2.76052	3.15587	2.78567	3.11641	3.13209	2.72917	2.86632	3.24996	3.28834	3.0459	3.51464	3.25056	3.11149	3.25613	3.97233	3.57934	4.21768	2.94564	2.93702	2.73288	3.13662	2.93721	3.08459	3.09953	2.82974	3.19095	3.15731	2.97464	3.75331	3.52658	3.08114	3.10679	3.42666	3.00808	3.05971
Olfr835	4.6398	4.35936	4.39552	4.14257	4.408	4.07754	4.55071	4.70431	4.50489	4.37617	4.49664	5.5446	4.21126	4.57051	4.33958	4.87075	4.47974	4.30167	4.49582	4.86189	4.89264	5.20527	4.63351	4.49397	4.25926	4.24977	4.10775	4.2365	4.11747	4.65116	4.53035	4.54628	4.59924	4.35449	4.65636	5.05432	4.47345	3.86594	4.43473	4.47808
Olfr836	3.15651	3.23734	3.36797	3.09811	3.14074	3.1457	3.82126	4.02657	3.74185	3.57021	4.00445	6.04137	3.271	3.72856	3.18985	3.89316	3.34057	3.63567	3.1867	3.5752	3.18426	3.56336	3.06791	3.23229	2.97636	3.25806	3.66877	3.33532	3.7935	3.70817	3.11726	3.43081	2.96811	4.35783	3.70267	3.39045	3.49205	3.48105	2.91976	3.08025
Olfr837	3.04245	3.20768	3.2993	2.97909	2.9864	2.98884	3.14131	3.04007	3.08764	3.13696	3.24643	3.29228	3.06796	3.5312	2.97981	3.13433	3.20026	3.04211	3.42835	3.44286	4.01324	3.53322	3.02061	3.04583	2.92395	3.17909	3.24154	3.07437	3.81541	3.19527	3.0072	2.9116	2.94536	4.18863	4.12971	3.08831	3.26085	3.49539	3.18008	3.1753
Olfr843	4.31925	4.63995	4.91029	4.68166	4.51039	4.10742	4.16158	4.18837	4.15687	4.16158	4.11447	4.40516	4.14626	3.73346	4.48701	4.47102	4.06749	4.57024	4.24256	4.02772	3.95318	4.40035	3.94854	3.71236	3.76085	4.3695	3.97461	4.15569	4.25884	4.37375	4.08618	4.38117	4.03707	4.40486	4.00477	4.08211	4.26944	4.13048	4.30564	4.2777
Olfr845	4.32794	4.15562	4.47193	4.16565	4.13226	3.98887	4.22281	4.34731	4.39635	4.32609	4.20169	4.48972	4.54526	4.86504	4.79488	4.31728	4.3404	4.45978	4.78168	4.78686	4.27508	4.60396	4.09976	4.0741	4.34419	4.63512	4.34075	4.3851	4.04262	4.29337	4.14127	4.21208	4.3327	4.20941	4.5751	4.24481	4.1588	4.23848	4.41689	3.94497
Olfr846	3.04668	3.12902	3.15238	2.94735	3.04337	2.99311	2.94936	3.06917	2.96943	3.00545	3.07788	3.306	3.23262	2.98139	3.27006	3.46351	3.51459	2.92856	3.0347	3.34824	3.33275	3.55311	3.10437	3.08817	2.93493	3.2211	3.32666	3.08546	3.43095	3.27797	2.97412	3.21273	3.16375	3.82091	3.58628	3.11697	3.43653	3.23097	3.1866	3.4678
Olfr847	3.46589	3.21124	3.08686	3.33671	3.23946	3.1666	3.38008	4.0471	3.72401	3.72037	3.86084	4.23415	3.08529	3.38096	2.96921	3.97845	3.86322	3.71041	3.53001	4.09002	3.8332	3.69192	3.34167	3.02183	3.03396	3.21086	3.08471	3.46016	3.42164	3.49462	2.98977	3.25999	3.11959	3.39828	4.26828	3.55584	3.42947	4.17004	3.25604	2.85571
Olfr849	3.11062	3.15922	3.01802	3.08024	3.09667	3.05648	3.45453	3.56557	3.59106	3.25964	3.62364	4.36389	3.32642	3.37029	3.4303	3.30798	3.31577	3.33907	3.19554	3.37203	3.17492	3.48264	3.0369	3.01279	2.97523	3.25534	3.33442	3.10748	3.15922	3.05659	2.88737	3.17492	2.83807	3.36638	3.13126	3.36458	3.49121	3.17492	3.29133	3.17492
Olfr850	4.58732	4.543	4.76492	4.35931	4.31504	4.43603	4.96675	4.87548	4.92253	5.49249	4.92353	5.32728	4.60736	4.68338	4.42489	4.81291	4.55858	4.42326	4.81852	4.53309	4.42321	4.8511	4.47514	4.46438	4.38676	4.55119	4.33179	4.56393	4.61583	4.67252	4.68601	4.97663	4.77032	4.2055	4.32089	4.60114	4.65285	4.45446	4.51599	4.43336
Olfr851	3.80863	3.75002	3.78135	3.96875	3.74173	3.61514	4.11359	4.01235	4.23668	4.2921	3.95992	4.60357	3.89702	4.1842	3.99301	3.69551	4.06465	3.93582	4.50961	4.23025	4.16916	4.52157	3.86386	3.68763	3.83391	3.85115	3.79509	3.7884	3.88062	3.67628	3.6384	3.71975	3.63513	4.22412	4.01522	3.75885	4.12282	4.06488	4.02227	4.02975
Olfr853	3.54074	3.70149	3.69631	3.69631	3.53202	3.58375	3.65068	3.62669	3.93707	3.7993	3.89791	4.14407	3.35514	3.89521	3.76345	4.4444	3.87382	3.74345	3.90326	3.84397	3.6211	4.1013	3.45469	3.54173	3.3987	3.66771	3.67641	3.5516	3.8754	3.80696	3.58597	3.50592	3.54228	4.16608	3.85559	3.69631	3.68379	3.68305	3.77151	3.82076
Olfr854	3.50125	3.5527	3.26793	3.61039	3.56058	3.41083	3.63468	3.92375	3.46352	3.8002	3.76551	4.1346	3.55666	3.45002	3.55035	3.91556	3.51038	3.79923	3.75711	3.99012	3.57303	3.83614	3.68611	3.45412	3.4823	3.75712	3.49755	3.32687	3.77756	3.82483	3.49833	3.445	3.62251	3.93407	3.54638	3.55189	3.91598	3.79963	3.46526	3.55578
Olfr855	3.9683	3.8377	3.62655	3.78559	3.71195	3.96875	3.89588	3.48585	3.48814	3.83047	3.77545	4.27039	3.43255	3.70887	3.62501	3.69433	3.59132	3.95703	3.79827	4.06016	3.87814	4.49091	3.45951	3.72404	3.58712	3.67364	3.48032	3.73365	4.00652	3.84973	3.77649	3.97202	3.70237	4.39913	4.3177	3.93115	4.02278	3.86897	3.45594	3.89325
Olfr856-ps1	4.37845	4.42058	4.34109	4.33154	4.12478	4.00082	4.86421	4.70171	4.78261	4.49604	4.83137	4.61879	4.18397	4.66516	4.46391	4.62671	4.65675	4.71485	4.36855	4.44145	4.43209	5.00345	4.21141	4.04328	3.93145	4.34546	4.06956	4.16963	3.89867	3.93478	4.14908	4.24817	4.15391	5.11192	3.9809	4.45438	4.46351	3.99097	4.3005	4.03994
Olfr857	3.93472	3.62587	3.59555	3.55227	3.60286	3.8487	3.93832	3.65819	3.6578	3.50792	4.20374	3.95592	3.69606	4.26307	3.72236	3.60343	4.20426	4.90764	4.03124	4.49059	3.88381	4.16731	3.32309	3.24271	3.21702	3.52062	3.26867	3.35613	3.8461	3.63991	3.43477	3.31483	3.38418	3.69911	3.60203	3.61398	3.84283	4.1087	3.67711	3.83587
Olfr859	3.51898	3.2609	3.20441	3.53553	3.23285	3.18003	3.25745	3.39315	3.2793	3.4275	3.0851	3.30864	2.99176	3.03783	3.18078	4.4968	3.79577	3.68568	3.48105	4.05916	3.15584	3.32564	3.08169	2.9241	3.00224	2.77624	2.97573	3.18521	3.50063	3.3416	3.01666	2.9929	2.91406	3.80854	5.03053	3.08697	3.64222	3.27459	3.32906	3.67358
Olfr860	3.47836	3.43347	3.48473	3.52109	3.35925	3.32564	3.11036	3.11115	3.3268	3.36577	3.39073	3.36728	3.17579	3.42418	4.20384	3.73648	3.5014	3.45008	3.47056	3.84287	3.7471	3.56801	3.50662	3.39125	3.48473	3.41053	3.24549	3.24372	4.01792	3.52946	3.54985	3.55535	3.16176	3.677	4.14481	3.48473	3.31622	3.71562	3.3114	3.49253
Olfr862	3.91387	4.19651	3.7535	3.79885	3.63704	3.90898	3.53756	3.91339	3.89719	3.51999	3.79335	4.30636	3.95649	4.09071	4.01475	4.36309	3.93175	4.20963	3.90898	4.67217	4.22286	5.03836	3.8058	3.66247	3.68846	3.47404	3.35117	3.81148	3.59449	3.98958	3.88892	3.63979	3.81127	4.07167	4.19521	3.80297	3.7852	3.98532	4.14262	4.05437
Olfr866	3.72722	3.59459	3.55638	3.52721	3.44776	3.74312	3.60838	3.6296	3.56015	3.66514	4.09828	3.87445	3.90773	4.063	3.88737	4.03078	3.96337	3.85512	3.7879	3.74312	3.74312	3.95919	3.59208	3.46841	3.48927	3.70885	3.56448	3.66874	3.73702	3.94174	3.93658	3.69967	3.72259	3.58323	3.91433	3.91897	3.60334	3.73615	3.50607	3.56075
Olfr867	4.96575	4.65444	4.69142	4.64774	4.71909	4.56002	4.93953	4.65776	4.61932	4.68336	4.72411	5.04306	4.52898	4.48894	4.79813	4.96592	4.19252	4.16635	4.29852	4.74047	4.44245	4.71502	4.57563	4.72411	4.63328	4.9887	4.6891	4.7633	4.47185	4.78602	4.537	4.55606	4.53051	4.78527	4.91827	5.01349	5.10194	4.33609	4.96078	4.87538
Olfr868	3.31631	3.22232	3.35514	3.14571	3.27598	3.13108	3.35514	3.32027	3.1693	3.24832	3.53928	3.35514	3.30618	3.42647	3.44961	3.52438	3.53639	3.66615	3.32019	3.45779	3.43067	3.6948	3.19012	3.04904	3.13682	3.39998	3.40809	3.0828	3.20891	3.71691	3.12988	3.12641	3.15431	3.74322	3.43456	3.38485	3.61052	3.54805	3.24679	3.19686
Olfr869	3.29529	3.37915	3.25884	3.37053	3.29405	3.31489	3.04559	3.24548	3.30365	3.1731	3.28569	3.52858	3.3775	3.37203	3.08689	3.91971	3.17793	3.3577	3.23177	3.5752	3.4678	4.06131	3.16917	3.23352	3.0508	3.54849	3.71705	3.29984	3.63609	3.21335	3.33099	3.12472	2.98237	4.46058	3.71108	3.30365	3.25136	3.45161	3.09101	3.33932
Olfr870	4.41185	4.19746	4.40975	4.31368	4.22209	4.33771	4.57578	4.78181	4.65799	4.47233	4.38354	4.97254	3.77939	4.28694	4.3727	4.42473	4.57006	4.21856	4.31879	4.95252	4.47937	4.17929	4.35733	4.16666	4.03534	4.50987	3.87279	4.52027	4.20958	4.04321	4.11049	4.32088	4.1887	4.35679	4.96408	4.45185	4.40153	5.15814	4.44514	4.42788
Olfr871	4.31782	4.47531	4.31751	4.36078	4.22737	4.17285	4.3307	4.54751	4.73769	4.47606	4.36623	5.12993	4.44897	4.67529	4.64141	4.60309	4.6698	4.63356	4.501	5.00958	4.38358	5.28856	4.2911	4.11809	4.06881	4.36368	4.32042	4.27417	4.40527	4.52496	4.42585	4.42847	4.08722	4.8503	4.46734	4.2517	4.44101	4.49687	4.30413	4.32877
Olfr872	3.04896	3.12636	3.1498	3.06667	3.13883	3.02882	3.20575	3.72939	3.83245	3.49799	3.22712	4.29049	3.07155	3.26809	3.21292	3.13427	3.21482	3.24211	3.17052	4.11212	3.43858	3.5752	2.97648	2.93631	2.93529	3.14257	3.13857	3.09067	3.58534	3.25789	3.23239	3.08741	3.04189	4.27237	3.45416	3.2376	3.24636	3.26091	3.12189	3.53355
Olfr873	3.57407	3.64872	3.46711	3.67287	3.30957	3.56634	4.45345	4.29784	4.31015	4.62582	3.7158	4.93428	3.7203	3.55752	3.21117	3.90179	3.60428	3.94456	3.87368	3.55102	3.42477	3.74508	3.67786	3.74579	3.52509	3.72225	3.68224	3.56457	3.74613	3.62909	3.52552	3.4985	3.60993	4.0869	3.79521	3.71103	3.81749	4.10648	3.69378	3.57645
Olfr874	5.1991	5.2154	4.94471	5.27322	5.04517	4.9775	5.24305	5.28721	4.96876	5.25901	5.43961	5.64784	4.91125	5.24306	4.69226	5.04675	5.05816	5.13616	5.10043	5.05059	4.83992	4.84657	5.1099	5.15123	4.86528	5.21654	5.06086	4.83143	5.31455	5.15592	5.05795	5.15234	5.15828	5.45213	5.18268	5.44444	5.09458	5.51072	5.22281	5.57831
Olfr875	4.57943	4.18729	4.31577	4.52614	4.30216	4.33529	4.56121	4.74639	4.9778	5.2361	4.81179	5.32432	4.46633	4.11188	4.31173	4.25733	4.30078	4.50217	4.38517	5.00045	4.55266	4.98902	4.39081	4.33165	4.41425	4.52971	3.88794	4.14562	4.48701	4.81214	4.45372	4.48129	4.27328	4.17952	4.48701	4.47738	4.57159	4.62769	4.49143	4.2233
Olfr876	4.13035	4.50012	4.53514	4.45035	4.24554	4.20397	4.5643	4.34782	4.16395	4.55775	4.51601	4.5354	4.57378	4.57554	4.39377	4.21674	4.60937	4.40453	4.47198	4.93316	4.44026	4.40922	4.24353	4.37493	4.33227	4.7873	4.16332	4.32103	4.3737	4.3288	4.24324	4.17896	4.1753	4.27334	4.19071	4.40328	4.68888	5.06184	4.42088	4.67187
Olfr877	4.08349	4.10564	4.35054	3.82165	3.96931	3.76439	3.98725	4.4834	4.10347	4.4689	4.20711	4.87441	3.79458	3.85377	3.91214	4.50452	4.04037	3.80826	4.27939	4.0126	4.20334	3.99043	3.71435	3.67964	3.60573	3.9194	3.88801	3.66776	3.77349	4.09061	3.46268	3.72197	3.70148	4.16505	4.31155	4.08903	4.09483	4.35223	3.92696	4.11512
Olfr878	4.68661	4.73695	4.63902	4.723	4.64679	4.62207	4.65108	4.71615	4.64679	4.64679	4.78901	5.06654	4.82626	4.79279	4.45983	5.1732	4.68594	4.7855	4.71339	4.76591	4.40982	4.63798	4.5715	4.4802	4.57826	4.51887	4.72669	4.64679	4.84196	4.98574	4.48782	4.61523	4.64576	4.66976	4.50752	4.67533	4.68863	4.87921	4.69238	4.56261
Olfr881	4.07525	3.99845	3.61688	3.83233	3.77356	3.714	3.79679	3.94545	4.11285	3.8309	3.76582	3.69347	3.53478	3.36663	3.65165	3.59736	3.59505	3.61656	3.52633	3.82808	3.9557	3.74415	3.33501	3.3372	3.43577	3.93016	3.45318	3.46636	4.06239	3.48457	3.51446	3.47072	3.4111	3.85451	3.53087	3.62233	3.6915	3.61715	3.62287	3.73651
Olfr883	3.81696	3.8717	3.51486	3.67652	3.557	3.5538	3.60332	3.98832	3.80082	3.70714	3.6506	4.12592	3.38303	3.30085	3.67309	3.38389	3.97676	3.73862	3.43651	3.89531	3.85478	4.03851	3.16385	3.22369	3.30439	3.79625	3.35893	3.32519	3.40753	3.25807	3.29412	3.30787	3.27991	3.66982	3.42645	3.45333	3.40668	3.60459	3.59848	3.69426
Olfr884	3.81696	3.8717	3.51486	3.67652	3.557	3.5538	3.60332	3.98832	3.80082	3.70714	3.6506	4.12592	3.38303	3.30085	3.67309	3.38389	3.97676	3.73862	3.43651	3.89531	3.85478	4.03851	3.16385	3.22369	3.30439	3.79625	3.35893	3.32519	3.40753	3.25807	3.29412	3.30787	3.27991	3.66982	3.42645	3.45333	3.40668	3.60459	3.59848	3.69426
Olfr885	3.81696	3.8717	3.51486	3.67652	3.557	3.5538	3.60332	3.98832	3.80082	3.70714	3.6506	4.12592	3.38303	3.30085	3.67309	3.38389	3.97676	3.73862	3.43651	3.89531	3.85478	4.03851	3.16385	3.22369	3.30439	3.79625	3.35893	3.32519	3.40753	3.25807	3.29412	3.30787	3.27991	3.66982	3.42645	3.45333	3.40668	3.60459	3.59848	3.69426
Olfr887	3.81696	3.8717	3.51486	3.67652	3.557	3.5538	3.60332	3.98832	3.80082	3.70714	3.6506	4.12592	3.38303	3.30085	3.67309	3.38389	3.97676	3.73862	3.43651	3.89531	3.85478	4.03851	3.16385	3.22369	3.30439	3.79625	3.35893	3.32519	3.40753	3.25807	3.29412	3.30787	3.27991	3.66982	3.42645	3.45333	3.40668	3.60459	3.59848	3.69426
Olfr888	3.77861	3.3925	3.45738	3.50451	3.37812	3.44427	3.91686	3.43044	3.65538	3.67125	3.79624	3.49076	3.29329	3.42807	3.47164	3.5723	3.28565	3.83186	3.50097	3.54957	3.34378	3.53736	3.66171	3.42033	3.28162	3.28395	3.69211	3.47991	3.77253	3.47379	3.62511	3.6204	3.50451	3.59355	3.64235	3.94451	3.8877	3.66499	3.51523	3.55112
Olfr889	3.28931	3.36276	3.26242	3.43265	3.2753	3.30148	3.45703	3.35033	3.48102	3.37484	3.32281	3.94506	3.11156	3.40412	3.30457	3.70622	3.54547	3.45224	3.35358	4.14396	3.69072	4.13002	3.26725	3.13644	3.10244	3.29367	3.39574	3.24167	3.37297	3.49153	3.47934	3.25389	3.17706	3.95435	3.67521	3.07573	3.414	3.51694	3.37724	3.52007
Olfr890	3.34425	3.31383	3.2951	3.45646	3.36938	3.38996	3.19813	3.23741	3.12584	3.27089	3.23446	3.38904	3.24361	3.52596	3.22021	3.30225	3.51815	3.35609	3.6896	3.68893	3.43251	3.47325	3.2647	3.46515	3.27098	3.23052	3.5818	3.49152	3.67729	3.62816	3.48797	3.37078	3.3249	3.67852	3.66526	3.43086	3.63	3.18921	3.40897	3.31452
Olfr891	4.32432	3.96135	3.72893	4.04858	3.76227	3.65303	4.24521	4.01816	4.01136	4.08496	3.95461	4.47547	4.02682	3.90633	4.49681	4.11218	3.79081	3.95596	3.701	4.13221	3.6114	4.07211	3.63773	3.5414	3.68339	3.85324	3.86641	3.70846	3.79952	3.9085	3.88397	3.85059	3.74363	4.4964	4.03342	3.72415	3.81605	4.0732	3.77183	3.92905
Olfr893	3.83477	3.62037	3.52538	3.69384	3.48532	3.35247	3.3729	3.82336	3.47338	3.58882	3.66173	3.66947	3.3756	3.79843	3.51545	3.31724	3.09529	3.4865	3.52956	3.57026	3.22857	4.15436	3.61668	3.49039	3.43903	3.32314	3.51948	3.52583	3.50162	3.45731	3.42567	3.27182	3.44649	3.99438	3.56894	3.50586	3.69304	3.32036	3.56709	3.47151
Olfr894	3.33188	3.56342	3.73642	3.55896	3.39203	3.58546	3.79485	3.56703	3.56456	3.50613	3.40892	3.32053	3.1846	3.28294	3.73637	3.85552	3.28785	3.41656	3.51142	3.50328	3.79128	3.88797	3.42767	3.36506	3.45668	3.50328	3.50328	3.64364	3.65397	3.46678	3.43299	3.33862	3.40459	4.05511	3.5488	3.56211	3.58439	3.5163	3.70593	3.37755
Olfr895	3.40579	3.21592	3.40276	3.36473	3.33743	3.5423	3.23538	3.42235	3.40692	3.29002	3.88286	4.09906	3.25177	3.60733	3.29159	3.58568	3.33075	3.94387	3.69032	3.44464	3.55971	3.64242	2.94587	3.23267	3.08877	3.23656	3.14372	3.22757	3.70547	3.11613	3.28022	3.20309	3.16121	3.72209	3.71257	3.20155	3.39085	3.83163	3.45622	3.43835
Olfr898	4.69163	4.81461	4.78259	4.82029	4.63363	4.69376	5.07182	4.90058	5.53098	5.2282	5.23346	5.3874	4.26277	4.50068	4.55786	4.54222	4.5212	4.56679	4.52918	4.34526	4.4101	4.69228	4.50169	4.18435	4.29604	4.95171	4.57245	4.45647	4.91995	4.69721	4.7703	4.83831	4.30125	4.50416	4.44313	4.60995	4.9699	4.56068	4.5843	4.55994
Olfr899	4.32653	4.23595	4.16702	4.21935	4.05343	3.85738	4.12987	4.19347	4.32065	4.41508	4.1178	5.1608	4.43761	3.98681	3.81801	4.4518	4.19144	4.40641	4.30102	4.18393	4.17295	3.98154	3.92421	4.01263	4.01823	4.2345	4.28338	4.29224	4.62493	4.12951	4.17263	4.15521	4.11796	4.12285	4.24041	4.64483	4.19087	4.04652	4.43544	4.275
Olfr9	3.83952	3.84819	3.88628	4.03294	4.00418	3.76834	4.44877	4.2864	4.95968	4.64728	4.33804	5.25373	3.8838	3.68644	3.92724	3.98178	3.81275	4.14277	4.00497	4.48986	3.78143	4.40046	3.81662	3.72366	3.91414	4.10318	3.84302	4.15922	3.86476	4.07908	4.11239	4.62281	3.86196	4.18146	4.1986	3.95725	4.43084	4.65192	4.13678	3.88214
Olfr90	4.49217	4.68315	4.73837	4.74532	4.28976	4.50272	4.78125	5.2047	5.05617	4.80992	5.11167	5.24773	4.71051	4.70907	4.7122	4.9028	4.71007	5.15256	4.84994	4.39602	4.23159	4.42638	4.22868	4.30362	4.5588	4.862	4.52085	4.67929	4.73283	4.77631	4.54076	4.79467	4.64119	5.14351	5.12092	4.96338	4.97655	4.75392	4.5834	4.78334
Olfr900	4.48033	4.08531	4.20136	4.14733	4.06901	3.94299	4.10685	4.35037	4.06191	4.28116	4.45437	4.24093	4.08334	4.16782	3.92186	4.31267	4.41196	4.03485	4.25127	4.48093	4.21466	4.80799	4.14388	3.93099	3.97354	4.27299	4.0987	4.39056	3.95573	4.37327	4.00843	4.22261	3.98181	4.16705	3.87555	4.2736	4.37938	4.27213	4.62507	4.04937
Olfr901	5.08	4.6637	4.61089	4.55923	4.56582	4.61295	5.17491	4.88594	5.02367	4.77721	5.21965	4.40698	4.69193	4.51698	5.21567	4.62956	4.55928	5.16518	4.92029	4.6258	4.74333	4.82633	4.47376	4.50627	4.39357	4.43378	4.27186	4.71754	4.26119	4.98266	4.58901	4.82786	4.6766	5.68659	4.2523	4.52475	5.23769	4.57869	4.66093	5.01534
Olfr902	4.30371	4.4552	4.29728	4.27179	4.42383	4.32541	4.34725	4.44977	4.61588	4.80834	4.59158	4.67686	4.18098	4.74108	4.76537	4.83829	4.22242	4.70747	4.49939	4.62192	4.87411	5.1896	4.1862	4.30401	4.08488	4.26086	3.99989	4.34236	5.08018	4.28313	4.37579	4.20408	4.35231	4.95829	4.79818	4.80719	4.79292	4.29801	4.64716	4.55432
Olfr904	3.40766	3.28363	3.23347	3.29947	3.22368	3.0022	3.78715	3.83996	3.36678	3.67935	3.49632	4.48271	3.83576	3.31218	3.19883	3.42947	3.59795	3.70376	3.34767	4.04319	3.42947	3.58679	3.06399	3.18052	3.25909	3.33991	3.15364	3.21519	3.80138	3.52638	3.26159	3.50101	3.22446	3.97136	3.40191	3.42597	3.78865	3.5968	3.38858	3.46621
Olfr905	3.3505	3.24187	3.35015	3.30726	3.13127	3.1751	3.50578	3.90945	4.62323	3.76901	3.76393	5.19468	3.04544	3.16388	2.96188	3.5251	3.53142	3.70876	3.11841	3.56853	3.86682	3.77301	3.02484	3.1765	3.1651	3.66203	3.11405	3.55597	3.66227	3.69698	3.53654	3.37831	3.31054	3.66493	4.06943	3.4206	3.36258	3.37303	3.17061	3.38634
Olfr906	3.80441	4.00296	3.89415	3.81678	3.88915	3.72106	3.79115	3.86241	4.19019	4.15428	4.21594	4.79235	3.59214	3.77627	4.16433	3.97989	3.98934	3.71728	4.06576	4.04315	3.94977	4.00953	3.58614	3.57263	3.51732	3.83713	4.01399	3.98608	4.02726	3.80301	4.02026	3.87035	3.81787	3.95154	4.30428	3.89049	4.04336	3.85236	3.67901	3.72325
Olfr907	3.67936	3.90334	3.76138	3.62534	3.70167	3.57676	3.99715	3.42841	3.78116	3.6913	3.85027	3.67045	3.78978	3.55495	3.65165	3.63534	4.25964	3.91679	3.80114	3.94607	3.63702	3.45612	3.63745	3.61826	3.72505	3.70905	3.3291	3.6029	3.89685	3.72027	3.46158	3.56275	3.85284	3.64256	3.82372	4.01625	3.61927	4.1239	3.49287	3.63342
Olfr908	3.58596	3.48746	3.83695	3.64541	3.61884	3.40041	3.7087	3.77519	3.91328	3.73082	3.58405	4.6949	3.26538	3.6169	3.33719	3.18725	3.49324	3.74312	3.43645	4.33408	3.65675	4.31625	3.6072	3.61426	3.55633	4.01308	4.08931	3.84544	3.86135	3.72438	3.91768	3.40244	3.58261	4.17504	3.99668	3.79237	4.04799	4.57303	3.53051	4.06965
Olfr91	6.68766	6.53257	6.45075	6.72015	6.56052	6.62501	7.29332	7.13048	7.3666	6.90804	7.25643	7.29576	6.54382	6.65452	6.3004	6.49869	6.44045	6.41565	6.83968	6.63331	6.41468	6.39494	6.6141	6.58274	6.72305	7.11495	6.79594	6.77631	6.5731	6.9585	6.62924	6.65806	6.68964	7.23805	7.27755	7.26086	6.77316	7.05587	7.22644	6.78634
Olfr910	2.9292	3.29423	3.22845	2.92144	3.42084	3.2624	3.32658	3.16384	3.1417	3.22707	3.69025	3.09892	3.27993	3.20768	3.439	3.44507	3.22113	3.87658	3.8931	3.35152	3.19059	3.09016	2.89857	3.20768	3.01994	3.15748	3.15763	3.07823	3.38492	3.03757	3.04799	3.18358	3.03656	3.25451	3.28654	3.41665	3.05995	3.38452	3.47194	2.70213
Olfr911-ps1	3.66674	3.5032	3.40655	3.42801	3.36658	3.45589	3.45691	3.57954	3.60554	3.47277	3.72901	4.18324	3.22365	3.66379	3.71941	3.32362	3.92602	3.60751	3.60128	3.55464	3.36397	3.69338	3.28237	3.45106	3.29235	3.30653	3.47277	3.37815	3.58967	3.47277	3.38954	3.51892	3.21444	3.67204	3.96948	3.39869	3.33255	3.51072	3.46036	3.34791
Olfr912	3.26709	3.11949	3.28272	3.15969	3.2864	3.15488	3.41351	3.25186	4.0983	3.97004	3.39761	4.90818	3.23803	3.36211	3.75375	3.6388	3.5443	3.74895	3.40235	4.3065	3.4415	3.97517	3.27842	3.17555	3.20912	3.28969	3.02684	3.30499	3.49659	3.41467	3.41311	3.36933	3.01297	3.62856	3.60271	3.29784	3.19094	3.70044	3.26751	3.55485
Olfr913	3.90649	3.75384	3.88743	3.57464	3.69838	3.68649	4.04767	4.44639	4.41097	4.30295	3.88743	5.12333	3.60286	3.63168	3.86578	4.03226	3.86322	3.95537	4.09773	4.62592	4.2956	4.26613	3.63439	3.50013	3.56165	3.82246	3.81869	4.00665	3.72885	3.95859	3.6527	3.78137	3.65434	4.5599	3.74122	3.77123	3.84555	3.71195	3.78319	3.96813
Olfr914	4.1276	3.91072	3.89825	3.9751	4.08672	4.06533	4.29102	3.78556	4.49992	4.32822	4.79666	4.48143	3.85324	3.77044	3.83188	4.02554	4.28041	3.92444	3.96473	4.32116	4.38275	4.63319	4.16841	4.08229	3.84254	4.229	3.86094	4.00608	4.32665	4.44526	4.28817	4.29717	4.05419	5.31067	3.89903	4.28528	4.22356	4.03619	4.23152	4.41364
Olfr915	4.0856	4.18853	4.04673	4.2805	4.0877	4.18955	4.3137	4.33698	4.16595	4.34082	4.35432	4.54396	4.27614	4.09118	3.99371	4.16665	4.08175	4.20925	4.07079	4.52732	4.27806	4.52165	3.91831	3.96088	3.93425	4.20237	3.89491	4.16352	4.02043	4.14651	4.19259	4.13339	4.13875	4.35254	4.40789	3.93213	4.08978	4.3049	4.18259	4.19337
Olfr916	3.56773	3.50218	3.49079	3.22141	3.54765	3.33404	4.4157	4.62127	4.11366	4.92	4.41429	5.26767	3.56316	3.52576	3.68812	4.08299	3.87151	3.98011	3.80998	3.57045	3.45829	3.90003	3.32007	3.38062	3.22943	3.34337	3.83364	3.69617	3.57894	3.34924	3.28061	3.63104	3.29912	3.62159	3.52314	3.65898	3.39974	3.29968	3.46579	3.46738
Olfr917	4.15958	4.2911	4.15565	3.83093	3.8452	3.98579	3.97827	4.24187	4.16364	3.85883	4.0405	4.04118	4.20956	4.13138	4.13138	4.68449	4.42331	3.90531	4.45434	3.92511	4.13261	4.01133	4.04646	4.21223	3.94251	4.73423	4.0623	4.08133	4.31482	4.06753	3.89275	4.08977	3.93332	4.16634	4.07341	4.30648	4.21935	4.33602	4.51349	4.45551
Olfr918	3.74827	3.47749	3.70472	3.56124	3.52029	3.48281	3.47915	4.24386	4.29921	3.57033	3.62641	3.69778	3.75147	3.47272	3.74869	3.69316	3.82833	3.91323	3.69478	3.95951	3.60913	3.81498	3.59049	3.69316	3.66085	3.64884	3.69415	3.80003	3.64021	3.84676	3.65818	3.60855	3.81537	4.59802	3.86558	3.84899	3.62917	3.7749	3.62172	3.69316
Olfr919	4.81844	4.62122	4.81473	5.05826	4.74969	4.6236	4.65224	4.74563	4.65951	5.01111	4.58614	4.7733	4.55962	4.3207	4.92756	4.75397	4.74338	5.15994	4.95295	4.89135	4.56186	5.17473	4.54836	4.28124	4.43564	5.17742	4.92021	4.75795	5.02725	4.80981	4.45791	5.11881	4.7712	4.89944	5.18761	5.08558	5.137	5.06608	4.8078	4.35386
Olfr92	5.4197	5.66829	5.46507	5.44977	5.37672	5.22789	6.2075	5.97498	6.39973	6.27216	6.2176	6.13037	5.63591	5.63753	5.31016	5.81865	5.73276	5.86727	5.76337	5.94047	5.39635	5.77472	5.43843	4.94261	5.33203	6.43102	5.8364	5.5584	5.7666	5.65678	5.62536	5.19155	5.47603	5.44184	5.9818	5.58317	6.32663	6.06046	5.81038	5.8778
Olfr920	4.8453	5.01796	5.17759	5.52242	5.53892	5.74198	7.41975	6.88125	7.13606	6.5576	6.59865	7.23086	5.85946	6.10352	6.57064	7.13948	7.26145	7.37063	7.22793	5.88405	5.51301	5.7796	5.50446	5.48166	6.15678	5.24454	5.26393	5.3307	5.32859	5.77534	5.71284	5.97361	6.19663	5.00217	5.31458	4.81685	4.83094	4.29597	5.50218	4.77091
Olfr921	3.21851	3.64817	3.75521	3.54371	3.50891	3.42559	4.14793	3.88463	3.83738	3.52591	3.62391	4.3978	3.34521	3.5686	3.83971	3.898	3.66473	4.28679	3.75744	3.51773	3.80801	4.20905	3.20633	3.37757	3.58179	3.50188	3.73637	3.50699	3.81225	3.64596	3.40566	3.58991	3.45423	3.94947	3.53307	3.35825	3.4256	3.83253	3.55686	3.62942
Olfr922	4.31272	4.44757	4.27385	4.32054	4.28243	4.39743	4.58992	4.7015	4.52583	4.53509	4.79172	4.88103	4.66821	4.77802	4.5549	4.56991	4.41554	4.46639	4.37526	4.35328	4.29313	4.75733	4.58561	4.3934	4.57767	4.41298	4.3728	4.15132	4.19317	5.27204	4.62578	4.40198	4.31497	4.51913	4.4142	4.71649	4.46595	4.33538	4.66437	4.10453
Olfr923	4.71432	4.537	4.6522	4.56152	4.35458	4.27995	4.38262	4.58213	5.22253	4.71799	4.48015	5.27159	4.25073	4.85767	4.63245	4.54327	4.61965	4.50599	4.31794	4.99188	4.64195	4.73303	4.56491	4.40013	4.28874	4.58767	3.98987	4.37708	4.38657	4.65994	4.25621	4.50194	4.46282	5.11066	4.44179	4.45171	4.36991	4.57013	4.42425	4.23302
Olfr924	2.92234	2.94769	3.1184	3.00548	2.98118	2.9352	3.05118	3.22502	3.11822	3.46724	3.16006	3.61472	3.34462	3.05003	3.60334	3.35263	3.35151	3.18527	3.36666	3.59721	3.11949	3.19189	2.83047	2.83195	2.87127	2.85854	3.04334	2.81314	3.58533	3.17847	2.96928	2.961	3.29407	3.10678	3.11878	2.97016	3.09721	3.03161	2.88318	3.18349
Olfr926	3.11334	3.16081	3.12762	3.13006	3.07411	3.09437	3.40374	3.32038	3.37236	3.19524	3.0707	3.71915	3.24959	3.33858	3.21822	3.37992	3.18735	3.52842	3.16958	3.37897	3.46176	3.40459	3.0066	3.01969	2.91928	3.23868	3.03446	3.03543	3.25525	3.30053	3.18172	3.04072	3.01036	3.60607	3.86125	3.05896	3.53549	3.34069	3.28724	3.54203
Olfr93	4.90439	4.5256	4.77672	4.88955	4.7099	4.69592	4.96668	5.205	5.46553	5.35446	4.90045	5.25677	4.68855	4.67643	4.73395	4.44017	4.63735	5.1125	4.32167	5.39356	5.25133	5.21854	4.81709	4.78789	4.88678	5.39194	4.98999	5.07791	4.66971	4.73693	4.7969	4.85797	4.80953	4.74827	4.91725	5.28834	5.11423	5.2503	5.24172	4.94045
Olfr930	3.96403	3.739	3.84562	3.79079	3.753	3.61126	3.97905	4.44678	4.40991	3.9286	4.18953	5.05383	3.60545	3.71133	3.83293	4.06108	4.20804	4.32936	4.00914	3.91299	3.74697	3.80403	3.55136	3.49853	3.62115	3.77972	3.76831	3.60457	3.50435	3.8738	3.69629	3.66085	3.5235	4.16398	3.69152	3.79182	4.14663	3.68136	3.68661	3.63532
Olfr933	4.49768	4.4633	4.34684	4.34134	4.26766	4.49783	4.61433	4.72124	4.62703	4.65389	4.22493	4.6261	4.24772	4.61726	4.52768	4.94224	4.46864	4.49035	4.38502	4.94028	4.87968	5.05023	4.17419	4.3954	4.38944	4.59016	4.45415	4.54403	4.86685	4.66368	4.58364	4.32013	4.48382	5.22316	4.67693	4.56092	4.75892	4.98292	4.51196	4.56689
Olfr934	3.85861	3.97521	3.90723	3.54642	3.73367	3.88828	3.69221	4.06524	4.12608	3.87021	3.86193	4.1254	3.88758	3.51416	3.28465	3.79791	3.89064	3.63654	3.55187	3.86537	3.91459	3.92398	3.54582	3.66665	3.46534	3.9039	3.47857	3.82136	3.85852	4.13002	3.56909	3.75815	3.56537	3.86354	3.91599	3.80215	3.71964	3.74818	4.16259	3.73367
Olfr935	3.93263	3.8021	3.99775	3.83099	3.94606	3.70064	4.28247	4.28699	4.10262	4.5518	4.3908	4.64202	4.19482	4.10079	4.03237	4.31926	4.57361	4.47515	4.06242	4.33775	4.09412	4.794	3.96408	4.01472	3.87244	4.05248	3.92457	3.84446	4.23553	4.33291	3.91536	3.97129	3.9712	4.1984	4.72158	3.96425	3.99216	4.16837	4.10262	4.0225
Olfr936	2.94803	2.85506	3.02856	3.02851	2.95168	2.87787	3.19741	3.99213	3.46679	3.24991	3.26743	5.09502	3.3636	3.02086	3.21184	3.152	3.11657	3.86921	3.53786	3.54122	3.06133	3.35967	2.9755	3.03693	2.97302	3.30213	3.08099	3.13743	3.16552	2.92202	3.3266	2.98882	3.02858	3.58665	3.3234	2.94372	2.9916	3.29731	2.87997	3.27377
Olfr937	3.8928	3.77977	3.9278	4.03947	3.59726	3.66122	3.71707	3.82946	4.26596	3.80126	3.68457	4.07091	3.42161	3.66373	3.6088	3.92372	4.06879	4.18605	4.21572	3.75714	4.0202	4.04283	3.59124	3.54457	3.61464	3.7687	3.34214	3.55001	3.72124	3.4519	3.41311	3.51587	3.54333	3.95446	3.49578	3.7489	3.95408	3.84393	3.68457	3.55332
Olfr938	3.90466	3.92395	4.12464	3.92751	3.89313	3.85473	4.16746	4.62773	4.46055	4.14637	3.92752	5.26645	3.73953	4.11749	4.61382	4.18044	4.36755	4.18633	4.20743	4.10236	3.70267	3.94075	3.83846	3.90518	3.80606	4.16774	4.09706	4.02483	4.08613	3.97462	3.76769	4.09951	4.27173	4.04123	4.38518	4.50053	4.22985	4.20156	4.21337	4.09858
Olfr94	5.29863	5.30996	5.33142	5.37329	5.01713	4.87594	4.40227	4.42891	4.60519	4.42972	4.68043	4.38959	4.91475	4.95604	4.80627	5.17836	4.58662	4.9312	4.55785	4.63899	4.9087	5.11717	5.14554	5.174	5.23243	5.35567	5.006	5.22146	5.20079	5.53655	5.11737	5.15903	5.06102	5.47266	4.88737	4.86875	5.51102	5.59259	5.50305	5.58813
Olfr943	3.76178	3.80144	3.64222	3.60505	3.46154	3.57986	3.31498	3.83834	3.55019	3.87812	3.49303	4.22181	3.60703	3.68893	3.27864	3.53425	3.86322	3.75171	3.49234	3.61472	3.71455	4.04493	3.3153	3.3645	3.46064	3.69651	3.47605	3.54679	3.81365	3.43681	3.42349	3.48647	3.51666	3.93868	3.4872	3.6282	3.74645	3.83273	3.24517	3.36687
Olfr944	3.42366	3.44088	3.74068	3.30918	3.70737	3.36468	3.54017	3.77476	3.59611	3.46182	3.52153	4.03502	3.1564	3.21393	3.40051	3.43059	3.32627	3.7416	3.53295	3.85005	3.3238	3.57363	3.17984	3.15118	3.2541	3.63096	3.35619	3.42947	3.13538	3.64485	3.4046	3.39668	3.34473	3.5517	3.5421	3.61169	3.31449	3.48517	3.42947	3.41587
Olfr945	3.45496	3.26105	3.38269	3.38942	3.32439	3.26899	3.32746	3.46752	3.59979	3.27271	3.22888	3.517	3.46377	3.35952	3.61295	3.47346	3.56506	3.65895	3.45941	3.6024	3.35952	3.45975	3.31223	3.35952	3.09621	3.3387	3.41435	3.10351	3.07236	3.37198	3.24156	3.30742	3.24741	3.7529	3.09132	3.27846	3.5184	3.26595	3.29291	3.40861
Olfr947-ps1	3.51734	3.47865	3.64028	3.40035	3.56279	3.61108	3.78748	3.52157	3.61044	3.58261	3.60338	3.4848	3.77694	3.61158	3.78632	3.83963	3.51911	3.96222	3.9245	4.27106	3.86733	3.91575	3.38339	3.44307	3.59623	3.55899	3.61648	3.6596	3.65898	3.59996	3.58335	3.54625	3.56566	3.98895	3.66176	3.75207	3.80503	3.59654	3.33173	3.52748
Olfr948	3.12959	3.14359	3.26026	3.13846	3.23321	3.3324	3.09346	3.35132	3.42283	3.52082	2.73933	4.19411	2.90767	3.70683	3.37335	3.46777	3.16717	2.76584	3.26077	3.98919	3.58126	3.07635	3.10537	2.91549	2.88327	3.14121	2.94144	2.97045	3.0086	3.09703	3.09647	3.04456	3.04584	4.25657	3.12715	3.02802	2.88996	4.08588	3.00777	2.90921
Olfr95	5.67477	5.68582	5.94721	5.65092	5.6044	5.68398	5.86863	5.76504	5.27772	5.22682	5.2136	5.8364	5.42436	5.43004	5.45508	5.09252	5.34319	5.18914	5.41286	5.71582	5.75744	5.90655	6.10488	5.58634	5.81149	6.28848	5.45339	5.8364	6.12448	6.38679	5.79011	5.91198	5.49182	5.86491	5.97708	6.19314	6.61825	6.36414	6.59671	6.13652
Olfr951	4.0314	3.91715	3.86188	3.75466	3.96637	3.82351	3.68744	3.94237	3.74527	3.85722	3.5737	3.58035	3.76557	3.77714	4.00103	3.68714	3.90444	3.77886	3.76034	4.11543	4.20914	3.82367	3.64207	3.44836	3.8197	3.69272	3.71856	3.78792	3.6274	3.75103	3.59816	3.63137	3.63536	3.90908	3.7897	3.87994	3.78813	3.69691	3.68457	3.78643
Olfr952	3.51825	3.10942	3.11263	3.12698	3.17318	3.04642	3.27014	3.91318	4.16799	4.17619	3.49607	3.87313	3.67126	2.98992	3.618	4.34661	3.3289	3.27454	3.24679	3.63324	2.9286	3.48997	3.19926	3.10049	3.28024	3.29386	3.13857	3.22957	3.59333	3.01274	3.30232	3.13152	3.11183	3.83051	3.24679	3.56759	3.10428	3.43857	3.06474	3.18947
Olfr954	4.0314	3.91715	3.86188	3.75466	3.96637	3.82351	3.68744	3.94237	3.74527	3.85722	3.5737	3.58035	3.76557	3.77714	4.00103	3.68714	3.90444	3.77886	3.76034	4.11543	4.20914	3.82367	3.64207	3.44836	3.8197	3.69272	3.71856	3.78792	3.6274	3.75103	3.59816	3.63137	3.63536	3.90908	3.7897	3.87994	3.78813	3.69691	3.68457	3.78643
Olfr955	4.02383	4.06702	3.91351	3.94336	3.85506	3.82025	4.04182	4.08598	4.46737	4.17845	3.9935	4.56926	3.9935	4.05805	4.07465	3.92183	3.87005	3.69503	3.9488	3.92692	3.69805	4.28062	3.67882	3.9136	3.67172	3.86554	3.73587	3.64687	3.94075	3.9245	3.82991	3.97272	3.70355	4.54088	3.99224	4.02829	3.98782	3.8958	3.92185	3.5514
Olfr957	4.16959	3.88103	4.10861	4.10161	4.09638	3.90675	4.15734	4.4271	4.07595	4.18106	4.0192	4.61256	4.26262	4.06986	3.58972	3.91007	4.19566	4.03936	3.8209	4.61315	4.14165	4.31208	3.86465	4.03381	3.76138	4.00914	3.95301	4.22087	3.93314	3.97024	3.70642	3.74578	3.95407	4.1426	3.97154	4.03381	4.09738	4.34567	3.76054	4.20794
Olfr958	5.34861	5.4991	5.22294	5.38091	5.19243	5.03149	5.47975	5.34485	4.94572	5.15836	5.11698	5.75523	4.90348	4.93829	4.98667	5.15066	4.86037	4.64336	5.31213	5.51844	5.4801	5.6895	5.12407	5.00253	5.16868	4.8311	5.13354	4.85634	5.20091	5.15836	5.16511	5.2624	4.91623	4.88393	4.96812	5.44356	5.22513	5.30481	5.02656	4.67192
Olfr959	5.13688	5.18736	5.31594	5.06437	5.12825	4.87569	5.26588	5.11397	5.51784	5.01701	5.1021	5.331	5.49186	4.9702	5.62048	5.14228	4.97534	5.33113	5.40058	5.4672	5.0968	5.15656	5.321	5.07231	5.01377	5.48242	5.20855	5.20816	5.19913	5.41335	5.13751	5.36346	5.15761	5.43457	5.01592	5.46503	5.2211	5.482	5.55196	5.31267
Olfr96	4.99434	4.9015	5.18938	5.02698	4.93119	4.86631	4.87162	4.92406	5.21205	5.10879	5.09729	5.02091	4.7624	4.92045	5.38018	5.35637	5.02843	5.05378	4.96995	4.76529	4.69907	4.66063	5.15294	4.94049	5.02843	5.46222	5.11325	5.40543	5.14873	5.02843	4.96286	5.1206	5.00995	5.61106	4.92153	5.46669	5.56946	5.25051	5.31196	5.19666
Olfr960	3.9842	3.80739	3.92145	3.79163	3.84737	3.48089	4.41424	4.97731	4.43799	4.45391	3.80539	5.38866	4.41024	4.4134	4.32486	3.88039	3.59471	4.06901	4.68974	4.22461	3.99612	5.08459	4.07004	4.25729	3.97171	4.20485	3.67006	4.06313	4.08355	4.7862	3.79459	4.25583	3.68876	4.19143	4.65887	4.23351	4.4923	4.35184	4.06901	3.99981
Olfr961	3.67988	3.84875	3.77442	3.69542	3.65853	3.41234	3.8193	3.69948	4.07449	3.91206	3.81116	4.05681	3.77442	3.72816	3.81257	4.35044	4.23647	3.48277	4.06871	4.06218	3.75937	3.9951	3.71056	3.49263	3.35368	4.03873	3.67952	3.70451	3.84972	3.88533	3.50648	3.61124	3.54679	4.45648	4.0277	3.73727	4.05471	3.84761	3.97614	3.6303
Olfr963	4.38012	4.50268	4.22668	4.0725	4.25105	3.843	3.83786	3.61111	3.70526	4.33538	3.53277	4.80771	4.05927	3.96716	4.29163	3.57111	3.33488	4.81247	3.71268	4.62026	3.87964	4.02081	4.5805	3.95701	4.06486	4.21569	3.43395	4.17262	4.12036	3.5031	4.66553	4.2643	3.98853	3.71855	3.65663	4.05929	4.06486	3.65512	4.7741	4.1405
Olfr965	4.75644	4.31699	4.73496	4.66969	4.19978	4.4576	4.02602	4.15086	3.94711	4.08503	4.23285	4.44896	4.50526	4.30996	4.5666	4.20344	4.39434	4.53441	4.43061	4.45507	4.13159	4.32322	4.33176	4.14391	4.15248	4.24736	3.9748	4.26856	3.97518	4.31924	4.35872	4.34347	4.35377	4.85344	4.00527	4.5015	4.41825	4.07574	4.35028	3.9088
Olfr967	4.66628	4.84187	4.64669	4.20634	4.52961	4.41785	4.49415	3.98306	3.74689	4.26379	4.60287	3.90783	4.66517	3.90005	4.99961	4.60283	4.55767	4.62657	4.19434	4.24211	4.99542	4.99298	4.2298	4.2575	4.31385	4.16083	4.3878	4.36249	4.01974	4.40632	4.19773	4.21008	4.27722	4.3878	4.44896	4.48571	4.4152	4.46212	4.29818	4.51317
Olfr968	3.355	3.3546	3.34975	3.46526	3.24207	3.21725	3.40424	3.33852	3.58601	3.39959	3.6589	3.93859	3.22957	3.33297	3.40935	3.55508	3.22116	3.55987	3.30904	3.5341	2.98858	3.26233	3.00058	3.06593	2.95423	3.40665	3.09317	3.26392	3.17243	3.35052	3.01995	3.37356	3.29135	3.36136	3.52702	3.23455	3.24742	2.94874	3.19479	2.96035
Olfr969	3.86387	3.6559	3.5777	3.60503	3.59605	3.51475	3.61183	3.85514	3.9501	3.63892	3.51196	4.28794	3.78421	3.59077	3.65165	3.27509	3.55448	3.644	3.59084	3.75491	3.99285	3.85699	3.48088	3.254	3.21221	3.2475	3.59799	3.3324	3.5299	3.26594	3.5973	3.4593	3.36502	3.70302	3.67672	3.6444	3.56768	3.68103	3.65938	3.6765
Olfr97	3.54597	3.62374	3.79488	3.94844	3.42118	3.56737	3.4766	3.59763	4.34898	3.89151	3.91781	4.67831	3.7097	4.26635	4.33143	3.81664	4.4634	4.55332	3.81236	4.70411	4.33434	4.55281	3.61939	3.51903	3.63074	4.6266	4.25207	4.23881	3.98803	3.9067	3.8625	3.9054	3.60219	4.36541	4.11474	3.84344	3.85314	3.85658	4.37893	3.83181
Olfr970	3.22618	3.34775	3.46964	3.28647	3.33102	3.32077	3.59986	3.38252	3.76855	3.54739	3.57227	4.18853	3.4473	3.30059	3.14468	3.59755	3.47667	3.67936	3.88873	3.66532	3.23992	4.04674	3.17981	3.00611	3.12752	3.40242	3.3775	3.3775	3.37386	3.40507	3.16946	3.42023	3.04589	3.56892	3.42007	3.40587	3.3775	3.60768	3.4981	3.41315
Olfr971	3.8187	3.89983	3.87107	4.09233	3.60596	3.75063	4.14996	4.06721	3.86614	3.62694	3.80735	4.68456	3.91375	3.84787	4.02082	4.05431	3.85646	3.56042	3.80019	4.06399	3.87513	4.20099	3.75586	3.77987	3.74563	4.03203	3.83877	3.92507	3.84604	3.96105	3.70892	3.89043	3.57076	3.90674	3.64583	3.94133	3.76417	4.08546	3.51343	4.05756
Olfr972	3.35861	3.32401	3.55574	3.4035	3.27229	3.19016	3.5754	3.9145	3.89135	4.01787	3.5093	4.6786	3.35841	3.50489	3.84226	3.49313	3.62111	3.8225	3.61112	3.91302	3.55351	3.69943	3.18951	3.22902	3.32401	3.60619	3.38597	3.30941	3.62955	3.74132	3.31964	3.77887	3.12056	3.59234	3.53836	3.25692	3.42642	3.81269	3.59838	3.46977
Olfr974	5.27968	5.325	5.28699	5.28699	5.18066	5.1342	5.21405	5.11978	5.24659	4.88559	5.06498	5.24659	5.56992	5.00919	4.83785	5.40412	5.28699	5.42129	5.22056	5.86885	5.05821	5.61314	5.22661	5.03326	5.15335	5.38754	5.39255	4.84845	5.58549	5.35151	5.0229	5.22221	5.16321	5.15065	5.8061	5.21388	5.52964	5.63741	5.6211	5.52433
Olfr975	5.73955	5.63141	5.71325	5.56643	5.71152	5.4983	5.68786	5.33858	5.64457	5.85832	5.63132	5.89569	5.60479	5.41733	5.40112	5.70438	5.57416	5.37898	5.35157	5.91524	5.54035	6.10085	5.43722	5.46018	5.47203	5.74963	5.47263	5.56768	5.62104	5.75086	5.64847	5.62819	5.64277	5.81676	5.83949	5.6521	5.74654	6.08309	5.78088	5.56302
Olfr976	4.52924	4.57099	4.33636	4.65402	4.50093	4.57722	4.73318	4.52768	4.43512	4.69538	4.56716	4.44864	4.4563	4.23428	4.63443	4.49365	4.26515	5.03966	4.48157	4.60464	4.27089	4.82309	4.26877	4.56793	4.50561	4.73032	4.27119	4.63237	4.73471	4.96206	4.64562	4.61054	4.43383	5.49617	4.73971	5.01579	4.94446	4.64423	4.71613	4.56191
Olfr978	5.24031	5.24411	5.31937	5.04228	5.21007	5.0577	5.37611	5.31586	5.82738	5.53731	5.27316	5.63022	5.32305	4.89579	4.77342	5.23916	5.08918	5.42323	5.03072	5.25202	5.25495	5.29567	5.23483	5.21965	5.19741	5.84215	5.01816	5.38714	5.17277	5.36483	5.4052	5.33709	5.10888	5.27812	5.24714	5.40569	5.29567	6.05333	5.54348	5.71116
Olfr979	4.71784	4.57706	4.57528	4.43077	4.54324	4.45869	4.25801	4.5709	4.70094	4.42951	4.55328	4.65779	4.59513	4.55328	4.28867	4.47088	4.99835	4.61952	4.16482	4.27647	3.84306	4.22724	4.60488	4.34389	4.79822	5.01354	4.66429	4.74463	4.40352	5.13069	4.5551	4.68865	4.59427	4.99045	4.84187	4.80873	4.75976	5.15696	4.94798	4.27188
Olfr98	3.54597	3.62374	3.79488	3.94844	3.42118	3.56737	3.4766	3.59763	4.34898	3.89151	3.91781	4.67831	3.7097	4.26635	4.33143	3.81664	4.4634	4.55332	3.81236	4.70411	4.33434	4.55281	3.61939	3.51903	3.63074	4.6266	4.25207	4.23881	3.98803	3.9067	3.8625	3.9054	3.60219	4.36541	4.11474	3.84344	3.85314	3.85658	4.37893	3.83181
Olfr980	4.7289	4.52933	4.90497	4.8194	4.71196	4.762	4.68893	4.93741	4.95716	4.63283	4.62715	4.7452	4.8369	4.90994	4.64293	5.17639	4.86079	4.67555	4.69274	4.90949	4.7907	5.4355	4.50659	4.64476	4.33076	4.77186	4.42335	4.60953	4.79652	4.83119	4.88746	5.10625	4.34456	4.79345	5.03003	4.72242	5.15875	4.96346	4.68497	5.04331
Olfr981	5.22299	5.02815	5.07186	5.1014	4.88637	4.95046	4.72623	5.19243	4.51359	4.7564	4.78309	4.54229	4.76169	4.98558	5.24093	4.6894	5.41398	4.72605	4.85696	4.8218	4.52022	5.03314	5.18183	4.90676	4.99189	5.24711	5.0198	4.91242	4.91465	5.01581	4.63251	5.13804	5.19693	5.55761	5.15138	5.2272	4.99486	5.97602	5.59176	5.31292
Olfr982	6.05207	6.26413	6.20816	6.28956	6.02932	6.27986	6.00361	6.33251	5.98116	6.2372	6.31524	5.92491	6.35256	6.05162	6.33586	6.39941	6.42389	6.15139	6.3663	6.28171	5.99412	6.37579	6.61584	6.11235	6.00823	6.68612	6.08244	6.33576	6.29687	6.18361	5.94458	6.13679	6.00203	6.77191	6.61277	6.78334	6.86139	6.67901	6.92443	6.4358
Olfr983	3.81696	3.8717	3.51486	3.67652	3.557	3.5538	3.60332	3.98832	3.80082	3.70714	3.6506	4.12592	3.38303	3.30085	3.67309	3.38389	3.97676	3.73862	3.43651	3.89531	3.85478	4.03851	3.16385	3.22369	3.30439	3.79625	3.35893	3.32519	3.40753	3.25807	3.29412	3.30787	3.27991	3.66982	3.42645	3.45333	3.40668	3.60459	3.59848	3.69426
Olfr984	5.74584	5.94079	5.91027	5.8093	5.70408	5.56835	5.53105	5.65056	5.39041	5.50773	5.57765	5.82071	5.37427	5.8093	5.36936	5.66521	5.66826	5.47415	5.5834	5.99563	5.88473	6.0974	5.80482	5.58062	5.57346	6.00684	5.55272	5.74017	6.15237	6.10128	5.85357	5.84419	5.80291	6.18529	5.65772	6.2107	6.05829	5.75883	6.03775	6.12776
Olfr985	4.82371	4.77338	4.93989	4.89663	4.78467	4.51805	4.69317	4.90188	4.74197	4.54773	4.38018	5.07885	4.59366	4.5162	4.72948	4.37857	4.53031	4.27423	4.2827	4.77409	4.51447	4.42287	4.54246	4.38565	4.53154	5.01741	4.41702	4.5826	4.99415	4.58226	4.42577	4.61704	4.78841	4.87593	4.74299	5.08853	5.2402	4.45372	4.93542	4.65169
Olfr986	5.26341	5.33367	4.71634	4.90347	5.00689	5.01507	5.14401	4.94675	4.90347	5.07438	4.82589	5.20225	5.09058	5.01854	4.68578	4.94567	5.02369	4.89028	5.14478	4.90736	4.6588	4.94061	4.93707	4.63867	4.63592	4.84099	4.62648	4.86114	4.79814	4.74785	4.70841	4.70101	4.70601	5.3037	5.27213	4.8144	4.87172	5.00256	4.90185	5.10096
Olfr987	3.83042	3.64916	4.01717	3.69313	3.71195	3.65829	3.7545	3.84497	3.5811	4.00281	3.58719	3.93579	3.8238	4.02903	3.98324	4.06036	3.76314	3.8862	3.74668	3.74586	3.7756	4.28062	3.70432	3.4737	3.56539	3.66175	3.36807	3.9484	3.8773	3.806	3.8077	4.02927	3.73659	3.8455	3.52695	4.13894	3.69559	3.49449	3.95677	3.57068
Olfr988	4.17152	4.03343	4.40775	4.2563	4.08576	4.08544	4.54333	4.72585	4.56122	4.8333	4.55099	4.70949	4.13989	4.18924	4.29419	4.32206	4.517	4.87048	4.88534	4.02637	4.07072	4.67877	4.05323	3.77176	3.89147	4.01636	4.07186	4.01633	4.17152	3.91918	4.13819	4.10798	4.04686	4.3973	4.27385	4.06946	4.234	4.21461	4.22526	4.01465
Olfr99	4.77152	4.536	4.75998	4.49406	4.54583	4.49692	7.5267	6.9656	7.5619	7.08265	6.82731	7.54115	6.12912	6.19331	6.7461	6.73332	6.81671	6.34207	6.77067	6.2201	6.1618	6.20394	4.28975	4.20095	4.51071	5.68967	5.53792	5.38	5.87535	5.28035	4.50771	4.95428	4.68713	5.43223	5.63524	5.57535	5.47529	5.18539	5.40982	4.92594
Olfr992	4.15287	3.90231	4.01139	3.85476	3.67743	3.9405	3.8009	3.76867	3.90052	3.93432	3.47206	3.84994	3.80156	3.82823	4.11796	4.46603	4.81338	4.26834	4.19693	3.87652	3.56124	3.82407	3.83596	3.65658	3.82289	3.93664	3.87991	3.8934	4.2113	4.72822	4.10354	3.92518	3.77501	4.39973	3.80578	4.24698	4.48621	3.98973	4.11261	3.75143
Olfr993	3.21453	3.33328	3.17873	3.43801	3.14274	3.33434	3.65123	4.29303	4.52527	3.84005	3.61926	3.4691	3.16335	4.99151	3.4069	3.95059	3.64807	4.26956	3.54401	4.89234	3.81675	4.23186	3.14915	3.20942	3.17736	3.47432	3.49333	3.25123	3.42066	3.58707	3.28999	3.48075	3.12046	3.73733	4.04518	3.40864	3.7019	3.45337	3.60992	3.14857
Olfr994	3.78362	3.57324	3.73125	3.77693	3.81501	3.52936	3.61883	3.37525	3.58286	3.63277	3.63925	4.00646	3.47154	3.57122	3.77736	3.86386	3.95126	3.88354	3.71453	3.49968	3.51555	3.66135	3.62413	3.56557	3.47341	3.73386	3.44845	3.25534	3.35075	3.35467	3.49489	3.60636	3.25851	4.12234	4.19292	3.58806	3.5417	3.70721	3.61933	3.88918
Olfr995	3.26467	3.23053	3.15056	3.27325	3.17388	3.03658	3.18758	3.56971	4.00112	3.33795	3.23976	4.06622	3.35537	3.32519	3.15242	3.4259	3.24414	3.59297	3.47572	3.47611	3.54693	3.35545	3.04223	2.98244	3.12539	3.23702	3.05057	3.27596	3.28264	3.08253	3.23133	3.26105	3.12379	3.77682	3.78681	3.33777	3.41585	3.28912	3.54337	3.31401
Olfr996	3.42654	3.42566	3.5298	3.29436	3.44272	3.31367	3.13146	3.28088	3.17606	3.35871	3.53716	3.3893	3.17697	3.44579	3.45504	3.45344	3.71474	3.20232	3.41351	3.73593	3.7539	4.40169	3.45248	3.30233	3.36066	3.43778	3.18556	3.22217	3.50944	3.67551	3.65833	3.33943	3.28779	3.94758	4.25331	3.24661	3.47646	3.40653	3.33521	3.32221
Olfr998	4.8259	4.89838	4.71062	4.63384	4.53189	4.82176	4.81982	5.2232	5.62205	5.1208	4.76941	6.3941	4.88107	4.67948	4.1322	4.7156	4.2393	4.55384	4.35212	4.54079	4.86979	4.64609	4.44578	4.51889	4.73891	4.48253	4.65102	4.88612	4.57508	4.81302	4.56224	4.83567	4.73349	4.95486	4.81146	4.7624	4.41968	4.8496	4.63452	4.47944

## Sheet:  Supplementary table 1b
Supplementary table 1b: OR genes Gapdh ranked expression.
	IP Mø LPS	IP Mø Naive	Vascular Mø Naïve	Vascular Mø Sepsis	BMDM Naive	BMDM LPS	SI Mø	Lung Mø	Spleen (RP) Mø	Mo.6C+II+.Bl	Mo.6C+II-.Bl	Mo.6C-II+.Bl	Mo.6C-II-.Bl	Microglia
Olfr1	0.214326	0.197536	0.225591	0.247707	0.218101	0.249451	0.223107	0.185488	0.241629	0.211223	0.209897	0.294743	0.283384	0.187037
Olfr1006	0.206276	0.165752	0.220591	0.227244	0.206573	0.216728	0.248742	0.152921	0.197737	0.181914	0.175475	0.233772	0.209911	0.221805
Olfr1008	0.0837018	0.0811249	0.115632	0.167501	0.131349	0.138392	0.18351	0.0718689	0.10732	0.0684313	0.0965484	0.152742	0.11967	0.10055
Olfr101	0.169039	0.158755	0.259859	0.258418	0.214277	0.258705	0.237466	0.152721	0.179516	0.20061	0.180391	0.19335	0.204418	0.185982
Olfr1013	0.0868991	0.0872128	0.0821986	0.105292	0.0859577	0.120367	0.119449	0.0484446	0.0784746	0.0616213	0.072724	0.0695992	0.0923654	0.0743994
Olfr1014	0.0847558	0.0876217	0.110491	0.156895	0.0682165	0.0920195	0.125212	0.0522764	0.0749025	0.079007	0.0642438	0.0985196	0.0863019	0.0642305
Olfr1015	0.201399	0.202913	0.262573	0.296402	0.21511	0.25676	0.267275	0.18392	0.230561	0.249315	0.221572	0.251424	0.252439	0.231159
Olfr1016	0.24253	0.212909	0.309154	0.303819	0.215118	0.265138	0.275402	0.195776	0.244395	0.232384	0.225031	0.235381	0.248604	0.261227
Olfr1019	0.19866	0.174544	0.184977	0.223429	0.185875	0.221081	0.210549	0.173228	0.191377	0.206976	0.187017	0.177738	0.211499	0.196472
Olfr102	0.157026	0.14275	0.279882	0.255387	0.179145	0.164727	0.143789	0.127079	0.150405	0.208783	0.147682	0.186182	0.178865	0.196511
Olfr1020	0.0937808	0.0656438	0.103432	0.147631	0.0960762	0.0946577	0.092692	0.0502555	0.0622615	0.0497311	0.0597682	0.106966	0.0744714	0.070455
Olfr1022	0.0863978	0.0829153	0.170655	0.187327	0.116448	0.0835687	0.145902	0.0636681	0.0879023	0.0886307	0.0752478	0.130002	0.106981	0.108356
Olfr1023	0.118463	0.100901	0.132721	0.165049	0.126138	0.142244	0.147895	0.0952509	0.103219	0.129701	0.101276	0.183945	0.152396	0.125137
Olfr1028	0.0772791	0.0830398	0.239449	0.313353	0.15971	0.170209	0.193652	0.0800731	0.0851003	0.103398	0.0907488	0.197537	0.127755	0.12097
Olfr1029	0.153949	0.175014	0.580197	0.589089	0.236662	0.251448	0.268664	0.120773	0.177667	0.239429	0.180088	0.253507	0.201267	0.232893
Olfr103	0.152668	0.123278	0.220525	0.199988	0.170521	0.204998	0.151619	0.140457	0.142193	0.119255	0.121325	0.145631	0.163199	0.144256
Olfr1031	0.0837158	0.0930812	0.123183	0.129874	0.110625	0.107848	0.0867163	0.0799291	0.0841094	0.0749063	0.0825632	0.115205	0.114031	0.0922718
Olfr1032	0.132541	0.128754	0.236917	0.224825	0.164174	0.160164	0.163202	0.117364	0.141134	0.156484	0.131541	0.190128	0.152706	0.145732
Olfr1033	0.0284244	0.0491957	0.0718748	0.0881763	0.0611381	0.0611776	0.0664488	0.0321211	0.0308709	0.0296966	0.0304969	0.0817978	0.0515391	0.0371583
Olfr1034	0.193062	0.16571	0.201586	0.17584	0.155125	0.161227	0.212765	0.13913	0.202266	0.166534	0.16177	0.164071	0.170119	0.163661
Olfr1036	0.193062	0.16571	0.201586	0.17584	0.155125	0.161227	0.212765	0.13913	0.202266	0.166534	0.16177	0.164071	0.170119	0.163661
Olfr1038-ps	0.0716096	0.0576218	0.156332	0.268246	0.108858	0.11177	0.124142	0.059346	0.10486	0.0884242	0.0704694	0.113522	0.106186	0.0933637
Olfr1045	0.134726	0.108025	0.204566	0.245724	0.103488	0.0922203	0.167345	0.103698	0.116996	0.150239	0.123266	0.164614	0.126863	0.131033
Olfr1046	0.0339235	0.0116811	0.0217255	0.0292883	0.0301028	0.0562777	0.063849	NA	0.0229213	0.0292904	0.00138747	0.043815	0.0155497	0.0210095
Olfr1047	NA	NA	0.00168268	0.00351243	NA	NA	0.0088334	NA	NA	7.92066e-05	NA	0.0298007	NA	-0.00557785
Olfr1049	0.000421641	NA	NA	NA	0.0354741	0.051742	0.0184447	NA	NA	0.0338394	NA	0.119083	0.0142644	-0.0160888
Olfr1051	NA	NA	NA	NA	NA	0.0741523	0.0233082	NA	NA	NA	NA	0.0693316	0.00901733	-0.0158313
Olfr1052	0.0816135	0.0624581	0.0658041	0.0795828	0.106908	0.0890689	0.124053	0.0686199	0.0813654	0.116225	0.0785209	0.144968	0.0808863	0.10912
Olfr1053	0.164091	0.12327	0.162969	0.211016	0.17673	0.196612	0.240309	0.132058	0.184784	0.17299	0.16906	0.275607	0.173429	0.178821
Olfr1054	0.151335	0.144027	0.236097	0.275217	0.172641	0.181631	0.212656	0.151114	0.201203	0.172823	0.146837	0.226912	0.196394	0.173037
Olfr1057	0.127391	0.118998	0.220922	0.24343	0.182507	0.19603	0.189597	0.121312	0.139352	0.162041	0.124756	0.18265	0.165458	0.153937
Olfr1058	0.0838366	0.0651729	0.1205	0.175969	0.0959341	0.0957152	0.118737	0.0464551	0.0700574	0.0788171	0.0530369	0.0627501	0.0616541	0.0759676
Olfr106-ps	0.0215619	0.0117398	0.0189906	0.0171925	0.0159121	0.1331	0.0550395	0.00670425	0.0310673	0.0638195	0.00785055	0.0576295	0.0367061	0.0198637
Olfr1061	NA	0.000942859	NA	0.00868702	0.01	0.0224694	0.0259982	NA	NA	0.0298972	NA	0.085769	NA	0.0105329
Olfr1062	0.155929	0.141031	0.169905	0.157955	0.128892	0.178707	0.18902	0.10932	0.149482	0.0884778	0.114615	0.179103	0.109641	0.131498
Olfr1065	0.0838366	0.0651729	0.1205	0.175969	0.0959341	0.0957152	0.118737	0.0464551	0.0700574	0.0788171	0.0530369	0.0627501	0.0616541	0.0759676
Olfr1066	0.010177	0.00196569	0.0708356	0.102667	0.0207869	0.0440258	0.0317461	NA	NA	0.00762252	NA	0.0310293	0.00303825	0.0101627
Olfr1076	0.0605193	0.0613766	0.355456	0.388977	0.0927622	0.139622	0.178388	0.0590908	0.087217	0.0767296	0.0581601	0.0726364	0.0838811	0.0830199
Olfr1077-ps1	0.184413	0.178357	0.283054	0.317087	0.210912	0.215744	0.304886	0.181119	0.199269	0.19764	0.190754	0.272697	0.209383	0.212479
Olfr1079	0.0489696	0.0463632	0.0876495	0.127216	0.0561372	0.0897109	0.0796407	0.0316349	0.0603696	0.0812689	0.0586833	0.0720056	0.0796263	0.0694416
Olfr1080	0.00205232	NA	0.00776513	0.0303611	0.0338182	0.0487198	0.087171	NA	0.00748988	0.0414466	0.00986641	0.0783331	0.00580496	0.0282922
Olfr1082	0.00467843	NA	0.0212498	0.0588656	NA	0.0206683	0.046938	NA	NA	0.0355003	NA	0.0176241	0.0125035	-0.000964432
Olfr1084	NA	NA	0.0283548	0.100796	0.017916	0.0209644	NA	NA	NA	NA	NA	0.0944281	NA	0.00272054
Olfr1085	0.175974	0.15033	0.185455	0.278106	0.165586	0.231588	0.309419	0.130501	0.154567	0.188389	0.16122	0.248255	0.230356	0.192347
Olfr1086	0.206417	0.197181	0.270548	0.238445	0.258492	0.292008	0.276273	0.171594	0.21601	0.235582	0.203051	0.218886	0.239769	0.186094
Olfr1087	0.0815143	0.0844144	0.137256	0.174427	0.106793	0.139477	0.162233	0.0895091	0.113739	0.10717	0.0964331	0.119276	0.111059	0.125222
Olfr1089	0.117715	0.0917063	0.166247	0.183704	0.120416	0.155466	0.131928	0.0795809	0.123644	0.148845	0.0887761	0.129137	0.119311	0.0810731
Olfr109	0.255648	0.247466	0.307556	0.275859	0.269288	0.476852	0.24894	0.225423	0.278328	0.282968	0.241358	0.252187	0.281015	0.252805
Olfr1090	0.0806266	0.0756597	0.109928	0.130467	0.122027	0.0987328	0.139124	0.0637694	0.0888106	0.073206	0.0856336	0.100076	0.0896183	0.0850182
Olfr1093	0.157268	0.146565	0.195081	0.195468	0.20968	0.19708	0.232963	0.169827	0.167454	0.19703	0.17169	0.243616	0.195414	0.168595
Olfr1095	0.0433964	0.0230098	0.00347262	0.0236718	0.0129447	0.123813	0.0964725	0.00410342	0.0326008	0.0388738	0.0386467	0.0817293	0.0865401	0.0474848
Olfr1097	0.0953128	0.0709952	0.151017	0.174291	0.0755336	0.0988086	0.132854	0.0430358	0.078043	0.0996747	0.0562005	0.0648927	0.0880891	0.0749778
Olfr1098	0.0826932	0.0679905	0.0929739	0.119201	0.100352	0.0945297	0.115101	0.0637839	0.0664371	0.0722359	0.060992	0.117778	0.0714518	0.0733096
Olfr1099	0.171437	0.132847	0.264707	0.310233	0.211374	0.212559	0.24582	0.124284	0.178873	0.173554	0.179793	0.142432	0.179459	0.191942
Olfr11	0.225355	0.202176	0.31463	0.299699	0.230726	0.295572	0.32735	0.208566	0.247301	0.238442	0.242976	0.318891	0.274617	0.240946
Olfr110	0.165615	0.150183	0.219311	0.23744	0.515638	0.453588	0.225757	0.152761	0.189328	0.175848	0.158508	0.181114	0.185099	0.246164
Olfr1100	0.0292323	0.0270992	0.103467	0.115586	0.0458226	0.108983	0.124701	0.0215742	0.0398909	0.053959	0.0314413	0.0593733	0.0484884	0.0352728
Olfr1101	0.0895388	0.0891982	0.168805	0.172281	0.136543	0.129028	0.158953	0.0767161	0.113995	0.135312	0.0952041	0.17232	0.169011	0.105485
Olfr1104	0.131233	0.11669	0.236213	0.238302	0.156385	0.166667	0.186355	0.127509	0.154017	0.180975	0.122524	0.129991	0.174022	0.146571
Olfr111	0.195936	0.208187	0.263544	0.268068	0.720537	0.677481	0.229209	0.179285	0.214921	0.148286	0.104999	0.159821	0.135033	0.368595
Olfr1111	0.120183	0.101801	0.198961	0.195098	0.154407	0.160128	0.152573	0.109477	0.116759	0.132857	0.112682	0.14488	0.116578	0.127296
Olfr1116	0.0357838	0.0379377	0.079023	0.162263	0.0507133	0.0464097	0.058385	0.00586753	0.0201301	0.0344219	0.0227006	0.0786706	0.0202725	0.0189065
Olfr1118	0.128414	0.119268	0.265826	0.278229	0.145242	0.201458	0.156533	0.111205	0.155524	0.146865	0.139587	0.19543	0.16144	0.153545
Olfr1122	0.166324	0.155049	0.248965	0.251966	0.209099	0.242374	0.277164	0.156931	0.189516	0.177713	0.154329	0.197069	0.182638	0.177785
Olfr1123	0.0756756	0.0561063	0.0323787	0.0466723	0.0500716	0.0722118	0.0269539	0.0524498	0.0712752	0.0697364	0.0483634	0.0613181	0.0691112	0.0774371
Olfr1135	0.0669551	0.0596351	0.0821345	0.115509	0.063415	0.139199	0.191624	0.0341193	0.0592571	0.07211	0.0599475	0.0711163	0.0517473	0.0629725
Olfr1136	0.139763	0.111134	0.238506	0.222381	0.145825	0.192728	0.143874	0.107798	0.127609	0.148521	0.121102	0.164757	0.154136	0.140402
Olfr1137	0.157252	0.144663	0.278544	0.290218	0.19414	0.183026	0.220751	0.133374	0.142503	0.177764	0.147878	0.234877	0.165772	0.189488
Olfr1138	0.128835	0.124774	0.173367	0.186465	0.149234	0.131598	0.157582	0.109891	0.143442	0.131786	0.128294	0.15837	0.147223	0.149627
Olfr1140	0.095888	0.0982042	0.177612	0.231365	0.0989448	0.11349	0.17398	0.0950006	0.114146	0.125406	0.0944812	0.127948	0.137336	0.123417
Olfr1141	0.0765801	0.0781803	0.12357	0.148849	0.0743234	0.103055	0.126496	0.0496337	0.0900113	0.0755575	0.0590602	0.0927751	0.0698423	0.083554
Olfr1152	0.317604	0.333729	0.479593	0.492432	0.367333	0.418978	0.498656	0.30766	0.382988	0.305573	0.365842	0.35499	0.394441	0.34942
Olfr1153	0.159404	0.143769	0.209472	0.230982	0.181481	0.159308	0.19107	0.128197	0.149496	0.188592	0.136959	0.17078	0.165397	0.182559
Olfr1155	0.266246	0.252191	0.348822	0.37935	0.295787	0.320919	0.343656	0.247359	0.28624	0.296148	0.268198	0.328296	0.305709	0.289255
Olfr1156	0.182294	0.177771	0.277047	0.252304	0.224838	0.265851	0.274837	0.173598	0.202721	0.215602	0.207596	0.203512	0.226558	0.222515
Olfr1157	0.138999	0.118744	0.1246	0.135058	0.133495	0.149571	0.151559	0.135139	0.155662	0.149305	0.11985	0.172816	0.16835	0.159986
Olfr1161	0.113056	0.0966812	0.0996021	0.12613	0.112693	0.12007	0.17725	0.088386	0.106266	0.100702	0.080159	0.156593	0.0975541	0.114982
Olfr1162	0.255927	0.235089	0.259248	0.290112	0.21624	0.228687	0.26598	0.202773	0.233359	0.260665	0.210581	0.254279	0.245567	0.222755
Olfr1163	0.255927	0.235089	0.259248	0.290112	0.21624	0.228687	0.26598	0.202773	0.233359	0.260665	0.210581	0.254279	0.245567	0.222755
Olfr1164	0.0834557	0.0827874	0.085473	0.0788785	0.102608	0.111511	0.175297	0.0936499	0.0742531	0.0857481	0.0873028	0.148877	0.127744	0.0733361
Olfr1166	0.120153	0.116168	0.223159	0.285784	0.118466	0.0809217	0.13725	0.0711604	0.10962	0.095803	0.0787612	0.14805	0.11898	0.103982
Olfr1167	0.0580798	0.0248626	0.0582744	0.106562	0.00910952	0.0494783	0.0810152	0.0208507	0.0114017	0.0419718	0.03365	0.0415904	0.0366254	0.0293482
Olfr1168	0.119938	0.127361	0.136971	0.141968	0.149111	0.147807	0.183636	0.0897345	0.121945	0.130586	0.11345	0.197897	0.137248	0.128559
Olfr1170	0.147261	0.118133	0.12974	0.149427	0.104404	0.118883	0.138315	0.0841692	0.115033	0.0813034	0.0947008	0.108798	0.0999762	0.116095
Olfr1173	0.0756669	0.0855574	0.106025	0.118935	0.094907	0.0921162	0.146587	0.0508541	0.0825541	0.0908165	0.0635683	0.107262	0.0773436	0.0595785
Olfr1174-ps	0.565672	0.519482	0.794925	0.803036	0.619498	0.671704	0.626339	0.565991	0.68911	0.611403	0.608046	0.585055	0.670342	0.777963
Olfr1176	0.0850478	0.0744724	0.091122	0.0867676	0.069528	0.110992	0.131061	0.0470314	0.0657235	0.0946695	0.0657302	0.125408	0.0839316	0.0770277
Olfr1189	0.0770874	0.0736037	0.0989693	0.101601	0.0735442	0.105151	0.15818	0.0561888	0.0736642	0.072859	0.0700341	0.0962547	0.10028	0.0976024
Olfr1193	0.078154	0.0794501	0.23381	0.252409	0.154615	0.112907	0.121286	0.0751523	0.097025	0.0518562	0.106113	0.109171	0.121387	0.101974
Olfr1195	0.048602	0.033779	0.0627598	0.0366341	0.0406081	0.0819436	0.106838	0.0272197	0.0374706	0.0654971	0.0391823	0.037654	0.0754086	0.0727362
Olfr1199	0.0204377	0.00679897	0.103943	0.183679	0.0468524	0.0655662	0.124246	0.010725	NA	0.0173394	0.0191988	0.0799021	0.0188259	0.0119041
Olfr1201	0.180611	0.160726	0.179196	0.23514	0.143843	0.153975	0.176586	0.116916	0.125341	0.147691	0.127987	0.189703	0.119641	0.161692
Olfr1202	0.0672584	0.0716894	0.145895	0.175741	0.0770568	0.111659	0.0909097	0.0534376	0.0750257	0.0703734	0.0468132	0.109861	0.087601	0.086359
Olfr1204	0.0661205	0.0515868	0.0666698	0.0754183	0.0734864	0.124378	0.103722	0.068527	0.0583971	0.0869138	0.0576967	0.149874	0.0600843	0.0554053
Olfr1205	0.180611	0.160726	0.179196	0.23514	0.143843	0.153975	0.176586	0.116916	0.125341	0.147691	0.127987	0.189703	0.119641	0.161692
Olfr1206	0.180611	0.160726	0.179196	0.23514	0.143843	0.153975	0.176586	0.116916	0.125341	0.147691	0.127987	0.189703	0.119641	0.161692
Olfr1209	0.153417	0.159367	0.208665	0.261625	0.154434	0.165622	0.18837	0.144557	0.173106	0.187162	0.148603	0.175377	0.20217	0.162539
Olfr1211	0.0776863	0.0750202	0.162755	0.182287	0.105323	0.104341	0.100908	0.079568	0.0901102	0.0984213	0.0755373	0.112908	0.109698	0.0924116
Olfr1212	0.0219347	0.0176921	0.0383486	0.0593479	0.0329926	0.0108794	0.0523375	0.00497382	0.022053	0.0525162	0.0229299	0.0469537	0.0358144	0.0365044
Olfr1214	0.024354	0.0357122	0.0418623	0.0954466	0.0485725	0.0594802	0.120823	0.0355265	0.057892	0.0452413	0.0364454	0.115157	0.0427634	0.0465362
Olfr1215	0.0910112	0.0748132	0.0901732	0.107652	0.0981846	0.126225	0.163697	0.04769	0.0971775	0.0971322	0.0662665	0.146583	0.120207	0.0941813
Olfr1216	0.0419455	0.0415073	0.0596467	0.0687551	0.065035	0.080155	0.0349504	0.0465304	0.0571625	0.0977996	0.0409037	0.0906812	0.0381867	0.0335598
Olfr1217	0.0123659	0.0160573	0.285478	0.276772	0.0696679	0.0549482	0.0723519	0.0048149	0.0256478	0.0292303	0.00996218	0.061994	0.0186096	0.0359797
Olfr1218	0.0626403	0.0455973	0.0699413	0.0855279	0.0790655	0.0773271	0.128611	0.0461163	0.0727833	0.0841889	0.0518475	0.121772	0.0650058	0.0799333
Olfr1219	0.0930174	0.0827016	0.167173	0.181445	0.102986	0.126571	0.108356	0.0714225	0.0941622	0.114701	0.0890923	0.116246	0.097018	0.12864
Olfr1220	0.0772811	0.0571706	0.1271	0.160308	0.0737939	0.0714794	0.122327	0.0612919	0.0578608	0.0892145	0.0471143	0.0939502	0.0884064	0.0813496
Olfr1221	NA	0.00298089	0.0294442	0.0638229	0.0371736	0.0800477	0.0597425	NA	0.0179115	0.0210064	NA	0.0382575	0.0033494	0.0040394
Olfr1222	0.263767	0.236821	0.314963	0.344867	0.226951	0.260131	0.324641	0.188942	0.233515	0.269488	0.220355	0.219849	0.254877	0.295392
Olfr1223	0.0860185	0.0786736	0.135607	0.13679	0.106054	0.12321	0.124611	0.0651069	0.104211	0.070843	0.0832928	0.131499	0.113483	0.0896402
Olfr1225	0.128582	0.117374	0.183249	0.195167	0.148032	0.161578	0.178651	0.10496	0.153888	0.147252	0.131761	0.199273	0.157256	0.124964
Olfr1226	0.184661	0.142252	0.294247	0.324028	0.181392	0.182101	0.198506	0.130114	0.191663	0.194717	0.154399	0.195765	0.159318	0.180976
Olfr1228	0.0392738	0.0420401	0.0936196	0.113408	0.0455535	0.0839752	0.0612864	0.0145463	0.0376004	0.0480537	0.0373821	0.0629277	0.0375006	0.049543
Olfr1229	0.309082	0.279632	0.427478	0.442161	0.375135	0.396153	0.392603	0.295114	0.334451	0.324899	0.296538	0.383079	0.349387	0.368737
Olfr1230	0.179876	0.155478	0.194592	0.218838	0.21315	0.232834	0.214974	0.148801	0.20466	0.161612	0.185861	0.19338	0.215324	0.168304
Olfr1232	0.0266493	0.0348999	0.0599068	0.0491516	0.0767802	0.0782274	0.0716724	0.0294144	0.0398283	0.0755922	0.0199231	0.107951	0.0393678	0.0309501
Olfr1234	0.110438	0.0916741	0.148285	0.152554	0.106999	0.133044	0.168469	0.0893534	0.0996519	0.101264	0.0956247	0.148714	0.141828	0.117735
Olfr1238	0.146167	0.135915	0.270405	0.322329	0.210507	0.179633	0.242479	0.134726	0.142356	0.126744	0.138432	0.181	0.161128	0.187607
Olfr1240	0.102135	0.10306	0.133744	0.133807	0.0830041	0.12554	0.153846	0.09155	0.0874393	0.117646	0.0911699	0.155328	0.121706	0.100452
Olfr1241	0.0858215	0.0764365	0.13842	0.196524	0.0980774	0.102816	0.157265	0.0833457	0.122515	0.0992032	0.0847578	0.13832	0.12252	0.11479
Olfr1242	0.170661	0.148426	0.214072	0.262177	0.138916	0.183138	0.193192	0.114772	0.132248	0.154153	0.144049	0.170834	0.156203	0.131535
Olfr1243	0.0680195	0.0730363	0.132602	0.135422	0.0686708	0.0935558	0.0839884	0.0609066	0.0707977	0.073003	0.0664283	0.0921871	0.0738444	0.0565599
Olfr1245	0.0657763	0.0359729	0.0440721	0.0808632	0.0410946	0.070576	0.0736483	0.0142141	0.0454365	0.0593236	0.0578329	0.164308	0.0862945	0.0617059
Olfr1246	0.0102174	0.00430283	0.0550565	0.0306151	0.0175101	0.0882393	0.0413724	NA	0.0198351	0.010091	0.00544173	0.0386073	0.0188014	0.0233416
Olfr1247	0.0453561	0.0357558	0.0602466	0.0980233	0.0842606	0.0767996	0.102825	0.0465218	0.0668474	0.0768798	0.0552678	0.132889	0.0729955	0.0734714
Olfr1248	0.024966	0.00151848	0.0152208	0.0285971	0.0215306	0.0575895	0.100193	NA	NA	NA	0.00528789	0.0239461	0.00113045	-0.019529
Olfr1249	0.142193	0.130783	0.177299	0.264992	0.195176	0.221463	0.217896	0.0912593	0.130788	0.14721	0.122056	0.182336	0.125199	0.163521
Olfr125	0.0502928	0.0329183	0.0322329	0.0282075	0.0578639	0.0646617	0.116271	0.0290699	0.0470831	0.039931	0.0523667	0.0840975	0.049598	0.0525235
Olfr1250	0.072057	0.0488705	0.0194797	0.0279586	0.0444125	0.0413713	0.0712221	0.0124952	0.0501223	0.0408944	0.0294948	0.0662556	0.0425332	0.0431045
Olfr1251	0.000515315	0.00597612	NA	NA	NA	0.00845779	NA	NA	NA	NA	NA	0.0181561	0.019654	-0.0231168
Olfr1252	0.14369	0.0971281	0.343306	0.298307	0.10278	0.190404	0.134333	0.100893	0.136273	0.139977	0.106533	0.139894	0.146062	0.150721
Olfr1253	0.0325776	0.0167378	0.00199869	0.0043734	0.0334981	0.0736798	0.0738015	0.0161818	0.0467504	0.0480114	NA	0.0893866	0.0327891	0.037956
Olfr1254	NA	NA	0.0142946	0.0010074	0.0147669	0.0306051	0.0810463	NA	NA	0.00151668	NA	0.0578194	0.00680916	0.00491059
Olfr1255	0.117296	0.109176	0.228539	0.224255	0.149572	0.173857	0.185562	0.108594	0.136087	0.160361	0.136995	0.193347	0.154784	0.14571
Olfr1256	0.175267	0.148937	0.198302	0.17182	0.167669	0.191374	0.204936	0.128566	0.168672	0.175714	0.150992	0.169753	0.173821	0.167933
Olfr1258	0.149448	0.145683	0.21643	0.289255	0.165704	0.200318	0.171491	0.143898	0.164094	0.165889	0.153673	0.191564	0.179395	0.170836
Olfr1259	0.133614	0.123731	0.265938	0.292743	0.176346	0.176984	0.202403	0.134663	0.148943	0.148485	0.152536	0.160333	0.173215	0.151268
Olfr1260	0.21158	0.20163	0.385794	0.423692	0.252716	0.271479	0.284736	0.184431	0.22625	0.247567	0.210904	0.212611	0.249851	0.218469
Olfr1261	0.0314679	0.0226704	0.122546	0.103804	0.0662006	0.0791554	0.0371076	0.0232314	0.0336699	0.0657469	0.0237865	0.114702	0.0470304	0.0421031
Olfr1263	0.144235	0.137814	0.199237	0.233225	0.144287	0.174343	0.200428	0.112667	0.149481	0.171901	0.120899	0.120001	0.142915	0.150389
Olfr1264	0.15942	0.138679	0.229534	0.301295	0.165259	0.208804	0.193431	0.129926	0.162206	0.167433	0.131752	0.161799	0.174458	0.169575
Olfr1265	0.101177	0.102776	0.131111	0.127073	0.116192	0.135807	0.168282	0.0802917	0.113242	0.127368	0.0745858	0.104023	0.104858	0.135974
Olfr1269	0.101177	0.102776	0.131111	0.127073	0.116192	0.135807	0.168282	0.0802917	0.113242	0.127368	0.0745858	0.104023	0.104858	0.135974
Olfr1270	0.0939955	0.100494	0.144681	0.182627	0.0927348	0.104566	0.116719	0.0771831	0.0952458	0.132072	0.0836471	0.160596	0.115291	0.115853
Olfr1271	0.130583	0.0993837	0.128843	0.137844	0.139144	0.167665	0.228653	0.0851149	0.120467	0.115073	0.0936835	0.167444	0.115114	0.090472
Olfr1272	0.241138	0.222972	0.415006	0.409665	0.238208	0.244161	0.302705	0.24242	0.286029	0.264362	0.243233	0.296776	0.281054	0.301433
Olfr1273-ps	0.0309126	0.0433676	0.095085	0.145112	0.031534	0.0648222	0.113301	NA	0.0103445	0.0159025	0.0143136	0.0789757	0.0145876	0.0259587
Olfr1274-ps	0.201709	0.176613	0.31178	0.221961	0.201196	0.232304	0.19388	0.141441	0.183122	0.188947	0.201201	0.194414	0.139586	0.150435
Olfr1289	0.0545577	0.049037	0.127393	0.165932	0.0815683	0.104685	0.133644	0.0408596	0.0679377	0.0734879	0.0504925	0.111183	0.0620814	0.0551238
Olfr13	0.270331	0.251122	0.39186	0.398997	0.290405	0.327608	0.338535	0.241351	0.311227	0.296908	0.24614	0.274504	0.275778	0.294401
Olfr1303	0.0730777	0.0674638	0.177586	0.219111	0.0805571	0.109413	0.0990466	0.0740572	0.102986	0.0838487	0.072522	0.129396	0.1217	0.105089
Olfr1309	0.162099	0.139735	0.192673	0.222314	0.180215	0.228	0.178899	0.13863	0.165684	0.171325	0.166598	0.141684	0.170237	0.165282
Olfr1310	0.114407	0.102703	0.156414	0.185891	0.126376	0.150842	0.183013	0.094396	0.1195	0.127088	0.0998571	0.160439	0.132497	0.126146
Olfr1325	0.0704146	0.069044	0.113532	0.135596	0.0836166	0.128195	0.0877873	0.0736609	0.094832	0.0857561	0.0793847	0.126721	0.107626	0.0876382
Olfr1351	0.125859	0.125149	0.178408	0.202758	0.150651	0.174324	0.237111	0.134733	0.149917	0.179551	0.168101	0.165809	0.156806	0.148328
Olfr1352	0.100304	0.0992497	0.149833	0.175171	0.112198	0.0979165	0.108822	0.103586	0.11579	0.135156	0.103283	0.160247	0.113355	0.119863
Olfr1353	0.0911019	0.0771096	0.231583	0.245674	0.128487	0.142049	0.156926	0.0920669	0.112687	0.117679	0.102455	0.140827	0.129588	0.10887
Olfr1354	0.188576	0.168737	0.259877	0.3036	0.173071	0.204297	0.231827	0.15642	0.188938	0.194341	0.182291	0.244454	0.213158	0.21253
Olfr1355	0.188576	0.168737	0.259877	0.3036	0.173071	0.204297	0.231827	0.15642	0.188938	0.194341	0.182291	0.244454	0.213158	0.21253
Olfr1356	0.105414	0.0789442	0.159535	0.209565	0.116595	0.107304	0.177116	0.0767856	0.09882	0.0928138	0.0941391	0.136672	0.121041	0.110539
Olfr1357	0.204817	0.190714	0.272905	0.295859	0.218384	0.239796	0.262361	0.196438	0.225191	0.201556	0.195638	0.288283	0.237453	0.234327
Olfr137	0.233689	0.221555	0.283844	0.337726	0.255354	0.236293	0.309225	0.219253	0.236657	0.214122	0.215375	0.253835	0.246627	0.24871
Olfr1387	0.145048	0.153916	0.219731	0.215097	0.152079	0.170014	0.219151	0.145088	0.193921	0.140813	0.146142	0.168767	0.199576	0.167053
Olfr1388	0.274662	0.262837	0.436446	0.441539	0.285082	0.338385	0.360875	0.247794	0.320602	0.294159	0.276375	0.350871	0.303943	0.313786
Olfr1389	0.223294	0.233878	0.33579	0.307133	0.256443	0.276418	0.324777	0.214771	0.260173	0.267466	0.255272	0.265095	0.298672	0.246077
Olfr1404	0.106483	0.0924794	0.176434	0.165608	0.126238	0.108491	0.147023	0.077631	0.114041	0.123698	0.0920035	0.10526	0.101543	0.120664
Olfr141	0.133446	0.112091	0.14726	0.149858	0.145541	0.151974	0.158809	0.0915977	0.102891	0.117437	0.106471	0.131331	0.105578	0.104831
Olfr1414	0.37412	0.326883	0.366614	0.381318	0.331109	0.354983	0.348405	0.318485	0.372332	0.371093	0.358867	0.354538	0.400472	0.386625
Olfr1415	0.37412	0.326883	0.366614	0.381318	0.331109	0.354983	0.348405	0.318485	0.372332	0.371093	0.358867	0.354538	0.400472	0.386625
Olfr1416	0.37412	0.326883	0.366614	0.381318	0.331109	0.354983	0.348405	0.318485	0.372332	0.371093	0.358867	0.354538	0.400472	0.386625
Olfr142	0.0992905	0.0866379	0.196503	0.192507	0.08957	0.12482	0.142765	0.063989	0.105676	0.114395	0.10293	0.145262	0.13178	0.121264
Olfr1420	0.201763	0.191391	0.259752	0.254153	0.276556	0.272009	0.253806	0.19569	0.225143	0.229051	0.209607	0.257094	0.223653	0.206707
Olfr1423	0.181362	0.1769	0.244974	0.262747	0.235317	0.209341	0.195296	0.166778	0.217801	0.224918	0.190112	0.217461	0.224156	0.22831
Olfr1424	0.0588398	0.048717	0.0805007	0.0873401	0.109431	0.107579	0.148429	0.0353445	0.0916897	0.0926363	0.0488457	0.100814	0.0895278	0.0758217
Olfr1425	0.234783	0.213051	0.248183	0.281998	0.233691	0.281561	0.275033	0.192446	0.251855	0.239017	0.218686	0.246784	0.254415	0.224634
Olfr1426	0.209336	0.19433	0.437997	0.433605	0.254508	0.294658	0.28252	0.191553	0.237669	0.191235	0.201978	0.28045	0.218485	0.20507
Olfr1427	0.158151	0.166474	0.23467	0.264455	0.216925	0.191819	0.245992	0.170853	0.19282	0.168727	0.15966	0.236115	0.213776	0.191745
Olfr1428	0.238663	0.225116	0.340507	0.411544	0.259823	0.292631	0.271905	0.252705	0.301348	0.259725	0.254402	0.271894	0.275763	0.284248
Olfr1431	0.114721	0.0682004	0.204486	0.250019	0.144108	0.146456	0.217091	0.0731155	0.0959682	0.076965	0.0965073	0.12362	0.114255	0.0956642
Olfr1434	0.00249023	0.00306262	0.0519636	0.0773532	0.0447603	0.0386618	0.0595031	NA	NA	0.0622987	0.0197851	0.116018	0.0294506	0.0441413
Olfr1436	0.0308864	0.0390349	0.143796	0.181139	0.0724095	0.0588781	0.163601	0.00385234	0.0495475	0.0515649	NA	0.027605	0.0326391	0.0311801
Olfr1437	0.146806	0.133823	0.226264	0.198869	0.170568	0.177337	0.132791	0.0932443	0.151878	0.170099	0.138628	0.166917	0.133815	0.114222
Olfr1442	0.0955265	0.100619	0.168815	0.213614	0.123311	0.141793	0.19646	0.0958923	0.111065	0.118472	0.106229	0.127651	0.138046	0.124449
Olfr1443	0.0288219	0.01765	0.0845621	0.0836363	0.0514336	0.0681607	0.0802208	0.020539	0.0428344	0.0456586	0.0357365	0.0554754	0.0704037	0.0532613
Olfr1444	0.130705	0.123172	0.275479	0.295582	0.196238	0.196724	0.156388	0.121109	0.143117	0.14847	0.151253	0.15545	0.158602	0.147282
Olfr1445	0.146289	0.12821	0.201602	0.189027	0.178043	0.201498	0.184944	0.104978	0.150071	0.143361	0.136102	0.132181	0.162277	0.15378
Olfr1446	0.0781873	0.0637124	0.11135	0.102692	0.100121	0.108534	0.115575	0.0463287	0.0651675	0.0575705	0.0727526	0.100127	0.0792895	0.100384
Olfr1447	0.0708488	0.0617087	0.111921	0.144077	0.127448	0.178495	0.18483	0.0582165	0.0695222	0.113836	0.0659141	0.12381	0.0942422	0.0941636
Olfr1448	0.0536313	0.0433172	0.0564005	0.060406	0.0632294	0.0734076	0.0855516	0.018294	0.0398055	0.0715014	0.033493	0.0796498	0.0498484	0.0694262
Olfr145	0.186003	0.175574	0.337527	0.363249	0.194549	0.206923	0.226271	0.164851	0.19704	0.204011	0.184582	0.185734	0.224411	0.214854
Olfr1451	0.0710612	0.0703761	0.104875	0.168469	0.100329	0.119417	0.113042	0.0472022	0.0777652	0.0592708	0.0599375	0.0797966	0.0662577	0.0722838
Olfr1453	0.10381	0.0956885	0.138508	0.17976	0.129168	0.173973	0.187374	0.0760582	0.126443	0.12581	0.101742	0.195346	0.120836	0.128081
Olfr1454	0.0594003	0.0445195	0.124499	0.152826	0.0801364	0.0826796	0.100373	0.0321257	0.0576483	0.0458808	0.0390702	0.0591037	0.0367456	0.0454796
Olfr1457	0.0178565	0.00911826	0.0470405	0.102125	0.0713029	0.0955386	0.100869	0.0105597	0.0296586	0.0172296	0.02049	0.0458223	0.00646059	0.0254478
Olfr1459	0.0655196	0.0575133	0.11022	0.0934397	0.125932	0.0972706	0.103116	0.0466506	0.0649188	0.0531158	0.077227	0.0999611	0.0753965	0.0726739
Olfr146	0.102044	0.0882678	0.105827	0.150201	0.152662	0.152157	0.128302	0.0691896	0.10171	0.0898362	0.0690072	0.123204	0.098633	0.077968
Olfr1461	0.125834	0.130664	0.320646	0.423698	0.163114	0.173546	0.202073	0.116127	0.148269	0.166771	0.133471	0.147089	0.171084	0.123868
Olfr1462	0.0250686	0.0268239	0.0677467	0.0624255	0.0540178	0.0723393	0.068527	0.0290372	0.0492038	0.0846715	0.0440396	0.0843034	0.0430905	0.0809248
Olfr1463	0.232842	0.197743	0.263048	0.223831	0.191288	0.202115	0.189561	0.2199	0.212402	0.225134	0.230025	0.22422	0.215146	0.239056
Olfr1465	0.187114	0.187397	0.322373	0.344937	0.246382	0.27884	0.308992	0.187838	0.214969	0.187799	0.208472	0.286195	0.22108	0.206209
Olfr1466	0.0797673	0.0806774	0.179096	0.183621	0.138094	0.143311	0.117661	0.0735337	0.107146	0.146386	0.0935106	0.110766	0.131083	0.0861085
Olfr1467	0.0994976	0.0933651	0.202453	0.197732	0.119204	0.0991091	0.122557	0.0726955	0.103653	0.0997802	0.0827765	0.171313	0.100872	0.111074
Olfr1469	0.0822556	0.0881263	0.177542	0.214547	0.104719	0.115669	0.11657	0.063634	0.102006	0.10226	0.0810899	0.10113	0.110342	0.0978018
Olfr147	0.289203	0.283114	0.437129	0.485031	0.345261	0.361617	0.341928	0.271651	0.329392	0.306332	0.296758	0.357834	0.335439	0.308265
Olfr1490	0.188215	0.192997	0.292432	0.277057	0.200687	0.253605	0.244526	0.179347	0.229087	0.203117	0.198966	0.220566	0.240032	0.202382
Olfr1491	0.237962	0.218057	0.300224	0.332508	0.267189	0.271647	0.316857	0.216546	0.264675	0.261285	0.247933	0.207653	0.306895	0.302805
Olfr1494	0.066634	0.0566556	0.100595	0.139143	0.0813725	0.0957735	0.186769	0.0789693	0.0813226	0.100708	0.0709371	0.111718	0.0846963	0.0922594
Olfr1495	0.203076	0.212968	0.286813	0.339442	0.225821	0.260625	0.261335	0.199923	0.258974	0.253279	0.213394	0.328591	0.272044	0.275519
Olfr1496	0.0517619	0.0430195	0.0648832	0.072867	0.0701038	0.0464904	0.0644751	0.0261314	0.0293068	0.0459323	0.0298732	0.0546726	0.036394	0.0510292
Olfr1497	0.324477	0.295134	0.400241	0.425189	0.330634	0.387481	0.436239	0.30934	0.328046	0.333513	0.3103	0.393495	0.357831	0.343938
Olfr1499	0.116013	0.0915694	0.184443	0.253547	0.11279	0.142186	0.156335	0.102074	0.111184	0.138613	0.106004	0.156275	0.117633	0.11037
Olfr15	0.147235	0.14042	0.203195	0.166951	0.178737	0.166788	0.158876	0.125936	0.166301	0.177524	0.131605	0.227997	0.192473	0.167278
Olfr1500	0.210862	0.203165	0.291355	0.303823	0.230853	0.260924	0.25798	0.193774	0.253306	0.222037	0.213108	0.304094	0.251575	0.229158
Olfr1502	0.226305	0.222528	0.390595	0.478779	0.292922	0.305761	0.350533	0.223268	0.270743	0.273138	0.239457	0.284957	0.258334	0.257295
Olfr1505	0.136343	0.114339	0.273852	0.267345	0.191451	0.231501	0.250665	0.158525	0.186812	0.194038	0.15822	0.182383	0.244901	0.218894
Olfr1506	0.246021	0.239121	0.298968	0.309492	0.214819	0.238976	0.28362	0.171881	0.229158	0.214863	0.225544	0.230187	0.251948	0.229673
Olfr1507	0.0988971	0.0695233	0.220875	0.228208	0.0893299	0.0961178	0.134065	0.0743231	0.100522	0.125942	0.08343	0.12634	0.113687	0.126173
Olfr1508	0.207103	0.188231	0.273796	0.341006	0.205135	0.239773	0.209632	0.184981	0.221676	0.205386	0.183781	0.183089	0.267363	0.224087
[truncated: 365 more rows]
